# Supplementary material for: Temporary adhesion of the proseriate flatworm Minona ileanae
Source: Philos Trans R Soc Lond B Biol Sci. 2019 Sep 9;374(1784):20190194. doi: 10.1098/rstb.2019.0194 (PMC6745481; doi:10.1098/rstb.2019.0194)
Supplement: Datasheets on Mass Spectrometry [file rstb20190194supp3.xlsx]

## Sheet: Mass Spec Overview
Transcript number	footprints of tail amp animals1	footprints of tail amp animals2	footprints of tail amp animals3	footprints of tail amp animals4	footprints of amp tails 1	footprints of amp tails 2	additional information
Mii73416_c0_g1_i1	û	û	û	û	ü	û	Adhesion candidate
Mii73416_c0_g1_i2	û	û	û	û	ü	û	Adhesion candidate
Mii73416_c0_g2_i1	û	û	û	û	ü	ü	Adhesion candidate
Mii73416_c0_g2_i2	û	û	û	û	ü	ü	Adhesion candidate
Mii73416_c1_g1_i1	û	û	û	û	ü	ü	Adhesion candidate
Mii73416_c1_g1_i2	û	û	û	û	ü	ü	Adhesion candidate
Mii73416_c1_g1_i3	û	û	û	û	ü	ü	Adhesion candidate
Mii73416_c1_g1_i4	û	û	û	û	ü	ü	Adhesion candidate
Mii73416_c1_g1_i5	û	û	û	û	ü	ü	Adhesion candidate
Mii73416_c1_g1_i6	û	û	û	û	ü	ü	Adhesion candidate
Mii79253_c2_g1_i1	û	û	û	û	ü	û	Adhesion candidate
Mii102341_c0_g1_i1	û	û	û	û	ü	ü
Mii102888_c0_g1_i1	ü	û	û	û	ü	û
Mii103221_c0_g1_i1	ü	û	û	û	ü	û
Mii107732_c0_g1_i1	û	û	û	û	û	ü
Mii108644_c0_g1_i1	û	û	û	û	ü	ü
Mii118150_c0_g1_i1	û	û	û	û	ü	û
Mii15957_c0_g1_i1	ü	û	û	û	û	ü
Mii16738_c0_g1_i1	û	û	û	ü	û	û
Mii20712_c0_g1_i1	û	û	û	û	ü	û
Mii20712_c0_g2_i1	û	û	û	û	ü	û
Mii21001_c0_g1_i1	û	û	û	û	ü	ü
Mii23973_c0_g1_i1	ü	û	û	û	ü	û
Mii24072_c0_g1_i1	ü	û	û	û	û	ü
Mii24311_c0_g1_i1	ü	û	û	û	ü	û
Mii26357_c0_g2_i1	û	û	û	û	ü	û
Mii27308_c0_g1_i1	ü	û	û	û	ü	û
Mii27308_c0_g2_i1	ü	û	û	û	ü	û
Mii27853_c0_g1_i1	ü	û	û	û	û	û
Mii29770_c0_g1_i1	ü	û	û	û	û	û
Mii33875_c0_g1_i1	û	û	û	û	ü	û
Mii34086_c0_g1_i1	û	û	û	ü	û	û
Mii37321_c0_g1_i1	û	û	û	û	ü	û
Mii37816_c0_g1_i1	û	û	û	û	ü	û
Mii3789_c0_g1_i1	ü	û	û	û	ü	û
Mii3798_c0_g1_i1	û	û	û	û	ü	û
Mii3798_c0_g2_i1	û	û	û	û	ü	û
Mii3798_c0_g3_i1	ü	û	û	û	ü	û
Mii38423_c0_g1_i1	û	û	û	û	ü	û
Mii39740_c0_g1_i1	û	û	û	û	ü	û
Mii40167_c0_g1_i1	ü	û	û	û	û	ü
Mii40648_c0_g1_i1	û	û	û	û	ü	û
Mii40648_c0_g1_i2	û	û	û	û	ü	û
Mii40849_c0_g1_i1	û	û	û	û	û	ü
Mii40867_c0_g1_i1	û	ü	û	û	û	û
Mii41466_c0_g1_i1	ü	û	û	û	ü	û
Mii41932_c0_g1_i1	ü	û	û	û	û	û
Mii41932_c0_g1_i2	ü	û	û	û	û	û
Mii43256_c0_g1_i1	û	û	û	û	ü	û
Mii44253_c0_g1_i1	û	û	û	û	ü	û
Mii44253_c0_g2_i1	û	û	û	û	ü	û
Mii44253_c0_g3_i1	û	û	û	û	ü	û
Mii44253_c0_g4_i1	û	û	û	û	ü	û
Mii44253_c0_g5_i1	û	û	û	û	ü	û
Mii44253_c0_g6_i1	û	û	û	û	ü	û
Mii45655_c0_g1_i1	û	û	û	û	ü	ü
Mii46106_c0_g1_i1	û	û	û	û	ü	û
Mii46234_c0_g1_i1	ü	û	û	û	û	ü
Mii46547_c0_g1_i1	ü	û	û	û	ü	û
Mii46547_c0_g1_i2	ü	û	û	û	ü	û
Mii46632_c0_g1_i1	ü	û	û	û	û	ü
Mii46632_c0_g1_i2	ü	û	û	û	û	ü
Mii46879_c0_g1_i1	û	û	û	û	ü	ü
Mii46879_c0_g1_i2	û	û	û	û	ü	ü
Mii47890_c0_g1_i1	ü	û	û	û	ü	û
Mii47890_c0_g3_i1	ü	û	û	û	ü	û
Mii48937_c0_g1_i1	ü	û	û	û	ü	û
Mii50851_c1_g1_i1	û	û	û	û	ü	û
Mii50925_c0_g1_i1	ü	û	û	û	ü	û
Mii50925_c0_g1_i2	ü	û	û	û	ü	û
Mii51784_c0_g1_i1	ü	û	û	û	ü	û
Mii51784_c0_g2_i1	ü	û	û	û	ü	û
Mii52200_c0_g1_i1	û	û	û	û	ü	ü
Mii54610_c0_g2_i1	û	û	û	û	û	ü
Mii55144_c0_g1_i1	û	û	û	û	û	ü
Mii55690_c0_g1_i1	ü	û	û	û	ü	û
Mii55690_c0_g2_i1	ü	û	û	û	ü	û
Mii55980_c0_g1_i1	ü	û	û	û	ü	û
Mii56068_c0_g1_i1	û	û	û	û	ü	û
Mii56121_c0_g1_i1	ü	û	û	û	û	ü
Mii56615_c0_g1_i3	û	û	û	û	ü	û
Mii57421_c0_g1_i1	ü	û	û	û	û	ü
Mii57421_c0_g1_i2	ü	û	û	û	û	ü
Mii57421_c0_g1_i3	ü	û	û	û	û	ü
Mii58359_c0_g1_i1	û	û	û	û	ü	û
Mii58597_c0_g1_i1	ü	û	û	û	ü	û
Mii58905_c0_g2_i1	û	û	ü	û	û	û
Mii58905_c0_g2_i3	û	û	ü	û	û	û
Mii59191_c0_g1_i1	ü	ü	ü	û	û	ü
Mii59191_c0_g2_i1	ü	ü	ü	û	û	ü
Mii59610_c0_g1_i1	û	û	û	û	ü	û
Mii59610_c0_g1_i3	û	û	û	û	ü	û
Mii5966_c0_g1_i1	û	û	û	û	ü	û
Mii59862_c0_g2_i1	û	û	û	û	ü	û
Mii60781_c0_g1_i1	û	û	û	û	û	ü
Mii60785_c0_g1_i1	û	û	û	û	ü	û
Mii60785_c0_g1_i2	ü	û	û	û	û	ü
Mii61349_c0_g1_i1	û	û	û	û	ü	û
Mii61349_c0_g1_i2	û	û	û	û	ü	û
Mii61472_c0_g1_i1	ü	û	û	û	ü	ü
Mii61537_c0_g1_i1	û	û	û	û	ü	û
Mii61805_c3_g1_i1	ü	ü	ü	ü	ü	ü
Mii61805_c3_g10_i1	ü	ü	ü	ü	ü	ü
Mii61805_c3_g11_i1	ü	ü	ü	ü	ü	ü
Mii61805_c3_g12_i1	ü	ü	ü	ü	ü	ü
Mii61805_c3_g13_i1	ü	ü	ü	ü	ü	ü
Mii61805_c3_g14_i1	ü	ü	ü	ü	ü	ü
Mii61805_c3_g15_i1	û	û	û	ü	ü	û
Mii61805_c3_g16_i1	ü	ü	ü	ü	ü	ü
Mii61805_c3_g17_i1	ü	ü	ü	ü	ü	ü
Mii61805_c3_g18_i1	û	û	û	ü	ü	û
Mii61805_c3_g19_i1	ü	ü	ü	ü	ü	ü
Mii61805_c3_g2_i1	ü	ü	ü	ü	ü	ü
Mii61805_c3_g20_i1	ü	ü	ü	ü	ü	ü
Mii61805_c3_g21_i1	ü	ü	ü	ü	ü	ü
Mii61805_c3_g22_i1	ü	ü	ü	ü	ü	ü
Mii61805_c3_g23_i1	ü	ü	ü	ü	ü	ü
Mii61805_c3_g24_i1	ü	ü	ü	ü	ü	ü
Mii61805_c3_g25_i1	û	û	û	ü	ü	û
Mii61805_c3_g26_i1	û	û	û	ü	ü	û
Mii61805_c3_g27_i1	ü	ü	ü	ü	ü	ü
Mii61805_c3_g28_i1	û	û	û	ü	ü	û
Mii61805_c3_g29_i1	ü	ü	ü	ü	ü	ü
Mii61805_c3_g3_i1	ü	ü	ü	ü	ü	ü
Mii61805_c3_g30_i1	û	û	û	ü	ü	û
Mii61805_c3_g31_i1	ü	ü	ü	ü	ü	ü
Mii61805_c3_g32_i1	ü	ü	ü	ü	ü	ü
Mii61805_c3_g33_i1	ü	ü	ü	ü	ü	ü
Mii61805_c3_g34_i1	û	û	û	ü	ü	û
Mii61805_c3_g35_i1	û	û	û	ü	ü	û
Mii61805_c3_g36_i1	ü	ü	ü	ü	ü	ü
Mii61805_c3_g37_i1	ü	ü	ü	ü	ü	ü
Mii61805_c3_g38_i1	ü	ü	ü	ü	ü	ü
Mii61805_c3_g39_i1	ü	ü	ü	ü	ü	ü
Mii61805_c3_g4_i1	ü	ü	ü	ü	ü	ü
Mii61805_c3_g40_i1	û	û	û	ü	ü	û
Mii61805_c3_g41_i1	û	û	û	ü	ü	û
Mii61805_c3_g42_i1	û	û	û	ü	ü	û
Mii61805_c3_g43_i1	û	û	û	ü	ü	û
Mii61805_c3_g44_i1	û	û	û	ü	ü	û
Mii61805_c3_g45_i1	ü	ü	ü	ü	ü	ü
Mii61805_c3_g46_i1	ü	ü	ü	ü	ü	ü
Mii61805_c3_g47_i1	û	û	û	ü	ü	û
Mii61805_c3_g5_i1	ü	ü	ü	ü	ü	ü
Mii61805_c3_g6_i1	ü	ü	ü	ü	ü	ü
Mii61805_c3_g7_i1	ü	ü	ü	ü	ü	ü
Mii61805_c3_g8_i1	ü	ü	ü	ü	ü	ü
Mii61805_c3_g9_i1	ü	ü	ü	ü	ü	ü
Mii62667_c1_g1_i1	û	û	û	û	ü	û
Mii62774_c0_g1_i1	û	û	û	ü	ü	û
Mii62904_c0_g1_i3	û	û	û	û	ü	û
Mii62904_c0_g1_i4	û	û	û	û	ü	û
Mii62904_c0_g1_i5	û	û	û	û	ü	û
Mii63177_c1_g1_i1	û	û	û	ü	ü	û
Mii63177_c3_g1_i1	û	û	û	û	ü	û
Mii63360_c1_g1_i2	û	û	û	û	ü	û
Mii63442_c0_g1_i1	û	û	û	û	ü	û
Mii63442_c0_g1_i2	û	û	û	û	ü	û
Mii63563_c0_g1_i2	û	û	û	û	ü	û
Mii63563_c0_g1_i4	û	û	û	û	ü	û
Mii63563_c1_g2_i1	û	û	û	û	ü	û
Mii63563_c1_g2_i2	û	û	û	û	ü	û
Mii64514_c0_g1_i1	ü	û	û	û	ü	û
Mii64514_c0_g1_i2	ü	û	û	û	ü	û
Mii64514_c0_g1_i3	ü	û	û	û	ü	û
Mii64848_c0_g1_i1	û	û	û	ü	ü	û
Mii64875_c0_g2_i1	ü	ü	û	û	û	û
Mii64875_c0_g2_i2	ü	ü	û	û	û	û
Mii64881_c0_g1_i1	û	û	û	ü	û	û
Mii65083_c0_g1_i1	û	û	û	û	ü	û
Mii65146_c0_g1_i1	ü	û	û	û	û	ü
Mii65436_c1_g1_i1	ü	ü	ü	ü	ü	ü
Mii65815_c0_g1_i1	û	û	û	û	ü	ü
Mii65815_c0_g1_i2	û	û	û	û	ü	ü
Mii65893_c1_g1_i1	û	ü	û	ü	û	û
Mii65987_c0_g1_i1	ü	û	û	û	û	ü
Mii65987_c0_g1_i2	ü	û	û	û	û	ü
Mii65987_c1_g1_i1	ü	û	û	û	û	ü
Mii65987_c1_g1_i2	ü	û	û	û	û	ü
Mii66880_c1_g1_i1	û	û	û	û	ü	ü
Mii66880_c1_g1_i2	û	û	û	û	ü	ü
Mii66880_c1_g1_i3	û	û	û	û	ü	ü
Mii66880_c1_g1_i5	û	û	û	û	ü	ü
Mii66880_c1_g1_i6	û	û	û	û	ü	û
Mii66880_c2_g1_i1	û	û	û	û	ü	ü
Mii66880_c2_g1_i2	û	û	û	û	ü	ü
Mii66880_c2_g1_i3	û	û	û	û	ü	ü
Mii66880_c2_g1_i4	û	û	û	û	ü	ü
Mii66946_c0_g2_i1	ü	ü	ü	ü	û	ü
Mii66946_c0_g2_i2	ü	ü	ü	ü	û	ü
Mii67005_c0_g1_i5	û	û	û	û	ü	û
Mii67005_c0_g1_i6	û	û	û	û	ü	û
Mii67606_c0_g2_i1	û	û	û	û	ü	û
Mii67859_c2_g1_i1	û	û	û	û	ü	û
Mii68344_c0_g2_i1	ü	û	û	û	û	ü
Mii68344_c0_g2_i2	ü	û	û	û	û	ü
Mii68344_c0_g2_i3	ü	û	û	û	û	ü
Mii68682_c0_g1_i2	û	û	û	û	ü	û
Mii68875_c0_g1_i1	ü	û	û	û	ü	û
Mii68875_c0_g2_i1	û	û	û	û	ü	û
Mii68875_c0_g3_i1	û	û	û	û	ü	û
Mii68875_c0_g4_i1	û	û	û	û	ü	û
Mii68875_c0_g5_i1	û	û	û	û	ü	û
Mii6910_c0_g1_i1	û	û	û	û	ü	û
Mii69442_c0_g1_i1	û	û	û	û	ü	û
Mii69442_c0_g1_i3	û	û	û	û	û	ü
Mii69442_c0_g1_i4	û	û	û	û	û	ü
Mii69476_c1_g1_i1	û	û	û	ü	ü	û
Mii69476_c1_g1_i2	û	û	û	ü	ü	û
Mii69476_c1_g2_i1	û	û	û	ü	ü	û
Mii69666_c0_g1_i1	û	û	û	û	ü	û
Mii69743_c0_g1_i1	û	û	û	ü	ü	û
Mii69942_c3_g1_i4	û	û	û	û	ü	û
Mii69942_c3_g1_i5	û	û	û	û	ü	û
Mii69942_c3_g1_i6	û	û	û	û	ü	û
Mii70140_c0_g1_i1	ü	û	û	û	û	ü
Mii70376_c0_g1_i1	ü	ü	ü	û	û	ü
Mii70376_c0_g1_i2	ü	ü	ü	û	û	ü
Mii70512_c1_g1_i1	ü	û	û	û	û	ü
Mii70512_c1_g2_i1	ü	û	û	û	û	ü
Mii70627_c0_g1_i1	ü	û	û	û	û	ü
Mii70735_c0_g1_i1	ü	ü	ü	û	û	ü
Mii70827_c0_g1_i1	û	û	û	ü	ü	û
Mii70827_c0_g1_i2	û	û	û	ü	ü	û
Mii70827_c0_g1_i3	û	û	û	ü	ü	û
Mii70920_c0_g1_i1	û	û	û	û	û	ü
Mii70920_c0_g1_i2	û	û	û	û	û	ü
Mii70920_c0_g1_i3	û	û	û	û	û	ü
Mii70920_c0_g1_i4	û	û	û	û	û	ü
Mii70920_c2_g1_i1	ü	û	û	û	û	ü
Mii70920_c2_g1_i2	û	û	û	û	û	ü
Mii71061_c1_g1_i4	û	ü	û	û	û	û
Mii71061_c1_g1_i5	û	ü	û	û	û	û
Mii71385_c1_g1_i2	û	û	û	û	ü	û
Mii71385_c1_g1_i3	û	û	û	û	ü	û
Mii71385_c1_g1_i6	û	û	û	û	ü	û
Mii71524_c0_g1_i1	ü	ü	ü	û	û	ü
Mii72132_c0_g1_i1	û	û	û	ü	ü	û
Mii72132_c0_g1_i2	û	û	û	ü	ü	û
Mii72132_c0_g1_i3	û	û	û	ü	ü	û
Mii72132_c0_g1_i4	û	û	û	ü	û	û
Mii72254_c0_g1_i1	ü	û	û	û	ü	ü
Mii72254_c0_g1_i2	û	û	û	û	ü	û
Mii72538_c1_g2_i1	ü	û	û	û	û	ü
Mii72538_c1_g2_i2	û	û	û	û	û	ü
Mii72538_c1_g2_i3	û	û	û	û	û	ü
Mii72538_c2_g2_i1	ü	û	û	û	ü	ü
Mii72538_c2_g2_i2	ü	û	û	û	ü	ü
Mii72538_c2_g2_i3	û	û	û	û	ü	û
Mii72538_c2_g2_i4	ü	û	û	û	ü	ü
Mii72538_c2_g2_i5	û	û	û	û	ü	û
Mii72538_c2_g2_i6	û	û	û	û	ü	û
Mii72538_c2_g2_i7	û	û	û	û	ü	û
Mii72538_c2_g3_i1	ü	û	û	û	û	ü
Mii73053_c0_g1_i1	ü	ü	ü	û	û	ü
Mii73053_c0_g1_i3	ü	û	ü	û	û	û
Mii74023_c1_g1_i1	û	û	û	û	ü	û
Mii74023_c1_g1_i2	û	û	û	û	ü	û
Mii74023_c1_g1_i3	û	û	û	û	ü	û
Mii74023_c1_g1_i4	û	û	û	û	ü	û
Mii74023_c2_g1_i1	û	û	û	û	ü	û
Mii74023_c2_g1_i2	û	û	û	û	ü	û
Mii74023_c2_g1_i3	û	û	û	û	ü	û
Mii74023_c2_g1_i4	û	û	û	û	ü	û
Mii74023_c3_g1_i1	û	û	û	û	ü	û
Mii74023_c4_g2_i1	û	û	û	û	ü	û
Mii74023_c4_g2_i3	û	û	û	û	ü	û
Mii74023_c4_g2_i6	û	û	û	û	ü	û
Mii74023_c4_g2_i7	û	û	û	û	ü	û
Mii74043_c5_g3_i1	ü	û	û	û	û	û
Mii74043_c5_g3_i2	ü	û	û	û	û	û
Mii74043_c5_g3_i3	ü	û	û	û	û	û
Mii74105_c1_g1_i1	û	ü	û	û	û	ü
Mii74105_c1_g1_i2	û	ü	û	û	û	ü
Mii74473_c0_g1_i1	û	û	ü	û	ü	û
Mii74473_c0_g1_i2	û	û	û	û	ü	û
Mii75165_c6_g1_i1	û	û	û	û	ü	û
Mii75705_c0_g1_i2	û	û	û	ü	û	û
Mii75705_c0_g1_i3	û	û	û	ü	û	û
Mii75705_c0_g1_i8	û	û	û	ü	û	û
Mii76739_c0_g1_i2	û	û	û	û	ü	û
Mii76739_c2_g1_i2	û	û	û	û	ü	û
Mii7682_c0_g1_i1	û	û	û	û	ü	û
Mii77707_c0_g1_i1	û	û	û	û	ü	û
Mii77722_c1_g1_i2	û	û	û	û	ü	û
Mii77765_c0_g2_i11	û	ü	û	û	û	ü
Mii77765_c0_g2_i3	û	ü	û	û	û	ü
Mii77765_c0_g2_i5	û	ü	û	û	û	ü
Mii77765_c0_g2_i8	û	ü	û	û	û	ü
Mii77974_c0_g1_i1	ü	û	û	û	ü	û
Mii77974_c0_g1_i10	ü	û	û	û	ü	û
Mii77974_c0_g1_i11	ü	û	û	û	ü	û
Mii77974_c0_g1_i12	ü	û	û	û	ü	û
Mii77974_c0_g1_i13	ü	û	û	û	ü	û
Mii77974_c0_g1_i14	ü	û	û	û	ü	û
Mii77974_c0_g1_i15	ü	û	û	û	ü	û
Mii77974_c0_g1_i16	ü	û	û	û	ü	û
Mii77974_c0_g1_i19	ü	û	û	û	ü	û
Mii77974_c0_g1_i2	ü	û	û	û	ü	û
Mii77974_c0_g1_i20	ü	û	û	û	ü	û
Mii77974_c0_g1_i21	ü	û	û	û	ü	û
Mii77974_c0_g1_i22	ü	û	û	û	ü	û
Mii77974_c0_g1_i3	ü	û	û	û	ü	û
Mii77974_c0_g1_i4	ü	û	û	û	ü	û
Mii77974_c0_g1_i5	ü	û	û	û	ü	û
Mii77974_c0_g1_i8	ü	û	û	û	ü	û
Mii77974_c0_g5_i1	ü	û	û	û	ü	û
Mii78135_c0_g1_i3	ü	û	ü	û	û	ü
Mii78597_c0_g1_i2	û	û	û	ü	û	ü
Mii78597_c0_g1_i3	û	û	û	ü	û	ü
Mii78597_c0_g1_i4	û	û	û	û	û	ü
Mii78791_c0_g1_i1	û	û	ü	û	ü	û
Mii78791_c0_g1_i2	û	û	û	û	ü	û
Mii78791_c0_g1_i3	û	û	û	û	ü	û
Mii78791_c0_g1_i4	û	û	ü	û	ü	û
Mii78791_c0_g1_i5	û	û	ü	û	ü	û
Mii78791_c0_g1_i6	û	û	ü	û	ü	û
Mii78791_c0_g1_i7	û	û	ü	û	ü	û
Mii78830_c0_g1_i1	û	û	ü	û	û	û
Mii78830_c0_g1_i4	û	û	ü	û	û	û
Mii79122_c0_g1_i2	û	û	û	û	ü	û
Mii79122_c0_g1_i4	û	û	û	û	ü	û
Mii79122_c0_g1_i5	û	û	û	û	ü	û
Mii7977_c0_g1_i1	û	û	û	û	û	ü
Mii79799_c0_g3_i1	û	ü	û	û	û	ü
Mii79799_c0_g3_i4	û	ü	û	û	û	ü
Mii80234_c1_g1_i1	û	û	ü	û	û	û
Mii80474_c0_g1_i1	û	û	û	û	ü	û
					‎‎‎	‎‏

## Sheet: footprints of tail amp animals1
Accession	Description	Score	Coverage	# Proteins	# Unique Peptides	# Peptides	# PSMs	Area	# AAs	MW [kDa]	calc. pI
unk	len=309 - [Mii66946_c0_g2_i1_5]	12.2082	19.61	1	0	3	4	8.98601e+07	102	10.7264	4.61475
	A2	Sequence	# PSMs	# Proteins	# Protein Groups	Protein Group Accessions	Modifications	ΔCn	Area	XCorr	Charge	MH+ [Da]	ΔM [ppm]	RT [min]	# Missed Cleavages
	High	TDLIPKDNVDISFPNNPERK	2	2	2	unk		0	137538105	3.31932	4	2312.19	2.18265	35.6165	2
	High	TDLIPKDNVDISFPNNPER	1	2	2	unk		0	93205999	3.28566	3	2184.1	3.82553	37.6648	1
	High	DNVDISFPNNPER	1	4	4	unk		0	38836266	2.39363	2	1516.71	6.24674	33.7148	0
unk	len=229 - [Mii66946_c0_g2_i2_5]	12.2082	26.32	1	0	3	4	8.98601e+07	76	8.40621	4.61475
	A2	Sequence	# PSMs	# Proteins	# Protein Groups	Protein Group Accessions	Modifications	ΔCn	Area	XCorr	Charge	MH+ [Da]	ΔM [ppm]	RT [min]	# Missed Cleavages
	High	TDLIPKDNVDISFPNNPERK	2	2	2	unk		0	137538105	3.31932	4	2312.19	2.18265	35.6165	2
	High	TDLIPKDNVDISFPNNPER	1	2	2	unk		0	93205999	3.28566	3	2184.1	3.82553	37.6648	1
	High	DNVDISFPNNPER	1	4	4	unk		0	38836266	2.39363	2	1516.71	6.24674	33.7148	0
unk	len=1034 - [Mii61805_c3_g1_i1_5]	11.6968	13.37	1	0	3	4	4.15573e+07	344	37.1517	7.41553
	A2	Sequence	# PSMs	# Proteins	# Protein Groups	Protein Group Accessions	Modifications	ΔCn	Area	XCorr	Charge	MH+ [Da]	ΔM [ppm]	RT [min]	# Missed Cleavages
	High	AGYAAGVAcDSGTNNAEcK	2	34	34	unk	C9(Carbamidomethyl); C18(Carbamidomethyl)	0	2.68503e+07	3.33034	2	1915.79	0.420894	23.7195	0
	High	VYRDIVNAVSTK	1	34	34	unk		0	63319012	2.80683	3	1364.75	-2.05121	29.0986	1
	High	cTIEPAYTSGDAFTK	1	34	34	unk	C1(Carbamidomethyl)	0	3.45028e+07	2.29185	2	1660.75	-1.91612	32.4537	0
unk	len=1021 - [Mii61805_c3_g2_i1_4]	11.6968	13.53	1	0	3	4	4.15573e+07	340	36.5984	6.72705
	A2	Sequence	# PSMs	# Proteins	# Protein Groups	Protein Group Accessions	Modifications	ΔCn	Area	XCorr	Charge	MH+ [Da]	ΔM [ppm]	RT [min]	# Missed Cleavages
	High	AGYAAGVAcDSGTNNAEcK	2	34	34	unk	C9(Carbamidomethyl); C18(Carbamidomethyl)	0	2.68503e+07	3.33034	2	1915.79	0.420894	23.7195	0
	High	VYRDIVNAVSTK	1	34	34	unk		0	63319012	2.80683	3	1364.75	-2.05121	29.0986	1
	High	cTIEPAYTSGDAFTK	1	34	34	unk	C1(Carbamidomethyl)	0	3.45028e+07	2.29185	2	1660.75	-1.91612	32.4537	0
unk	len=1001 - [Mii61805_c3_g3_i1_5]	11.6968	13.81	1	0	3	4	4.15573e+07	333	35.752	6.96143
	A2	Sequence	# PSMs	# Proteins	# Protein Groups	Protein Group Accessions	Modifications	ΔCn	Area	XCorr	Charge	MH+ [Da]	ΔM [ppm]	RT [min]	# Missed Cleavages
	High	AGYAAGVAcDSGTNNAEcK	2	34	34	unk	C9(Carbamidomethyl); C18(Carbamidomethyl)	0	2.68503e+07	3.33034	2	1915.79	0.420894	23.7195	0
	High	VYRDIVNAVSTK	1	34	34	unk		0	63319012	2.80683	3	1364.75	-2.05121	29.0986	1
	High	cTIEPAYTSGDAFTK	1	34	34	unk	C1(Carbamidomethyl)	0	3.45028e+07	2.29185	2	1660.75	-1.91612	32.4537	0
unk	len=1021 - [Mii61805_c3_g4_i1_4]	11.6968	13.53	1	0	3	4	4.15573e+07	340	36.6985	6.96143
	A2	Sequence	# PSMs	# Proteins	# Protein Groups	Protein Group Accessions	Modifications	ΔCn	Area	XCorr	Charge	MH+ [Da]	ΔM [ppm]	RT [min]	# Missed Cleavages
	High	AGYAAGVAcDSGTNNAEcK	2	34	34	unk	C9(Carbamidomethyl); C18(Carbamidomethyl)	0	2.68503e+07	3.33034	2	1915.79	0.420894	23.7195	0
	High	VYRDIVNAVSTK	1	34	34	unk		0	63319012	2.80683	3	1364.75	-2.05121	29.0986	1
	High	cTIEPAYTSGDAFTK	1	34	34	unk	C1(Carbamidomethyl)	0	3.45028e+07	2.29185	2	1660.75	-1.91612	32.4537	0
unk	len=1024 - [Mii61805_c3_g5_i1_4]	11.6968	13.49	1	0	3	4	4.15573e+07	341	36.8096	7.1958
	A2	Sequence	# PSMs	# Proteins	# Protein Groups	Protein Group Accessions	Modifications	ΔCn	Area	XCorr	Charge	MH+ [Da]	ΔM [ppm]	RT [min]	# Missed Cleavages
	High	AGYAAGVAcDSGTNNAEcK	2	34	34	unk	C9(Carbamidomethyl); C18(Carbamidomethyl)	0	2.68503e+07	3.33034	2	1915.79	0.420894	23.7195	0
	High	VYRDIVNAVSTK	1	34	34	unk		0	63319012	2.80683	3	1364.75	-2.05121	29.0986	1
	High	cTIEPAYTSGDAFTK	1	34	34	unk	C1(Carbamidomethyl)	0	3.45028e+07	2.29185	2	1660.75	-1.91612	32.4537	0
unk	len=1024 - [Mii61805_c3_g6_i1_4]	11.6968	13.49	1	0	3	4	4.15573e+07	341	36.8676	7.1958
	A2	Sequence	# PSMs	# Proteins	# Protein Groups	Protein Group Accessions	Modifications	ΔCn	Area	XCorr	Charge	MH+ [Da]	ΔM [ppm]	RT [min]	# Missed Cleavages
	High	AGYAAGVAcDSGTNNAEcK	2	34	34	unk	C9(Carbamidomethyl); C18(Carbamidomethyl)	0	2.68503e+07	3.33034	2	1915.79	0.420894	23.7195	0
	High	VYRDIVNAVSTK	1	34	34	unk		0	63319012	2.80683	3	1364.75	-2.05121	29.0986	1
	High	cTIEPAYTSGDAFTK	1	34	34	unk	C1(Carbamidomethyl)	0	3.45028e+07	2.29185	2	1660.75	-1.91612	32.4537	0
unk	len=1024 - [Mii61805_c3_g7_i1_4]	11.6968	13.49	1	0	3	4	4.15573e+07	341	36.7955	7.1958
	A2	Sequence	# PSMs	# Proteins	# Protein Groups	Protein Group Accessions	Modifications	ΔCn	Area	XCorr	Charge	MH+ [Da]	ΔM [ppm]	RT [min]	# Missed Cleavages
	High	AGYAAGVAcDSGTNNAEcK	2	34	34	unk	C9(Carbamidomethyl); C18(Carbamidomethyl)	0	2.68503e+07	3.33034	2	1915.79	0.420894	23.7195	0
	High	VYRDIVNAVSTK	1	34	34	unk		0	63319012	2.80683	3	1364.75	-2.05121	29.0986	1
	High	cTIEPAYTSGDAFTK	1	34	34	unk	C1(Carbamidomethyl)	0	3.45028e+07	2.29185	2	1660.75	-1.91612	32.4537	0
unk	len=1021 - [Mii61805_c3_g8_i1_4]	11.6968	13.53	1	0	3	4	4.15573e+07	340	36.7005	6.96143
	A2	Sequence	# PSMs	# Proteins	# Protein Groups	Protein Group Accessions	Modifications	ΔCn	Area	XCorr	Charge	MH+ [Da]	ΔM [ppm]	RT [min]	# Missed Cleavages
	High	AGYAAGVAcDSGTNNAEcK	2	34	34	unk	C9(Carbamidomethyl); C18(Carbamidomethyl)	0	2.68503e+07	3.33034	2	1915.79	0.420894	23.7195	0
	High	VYRDIVNAVSTK	1	34	34	unk		0	63319012	2.80683	3	1364.75	-2.05121	29.0986	1
	High	cTIEPAYTSGDAFTK	1	34	34	unk	C1(Carbamidomethyl)	0	3.45028e+07	2.29185	2	1660.75	-1.91612	32.4537	0
unk	len=1021 - [Mii61805_c3_g9_i1_4]	11.6968	13.53	1	0	3	4	4.15573e+07	340	36.6014	6.72705
	A2	Sequence	# PSMs	# Proteins	# Protein Groups	Protein Group Accessions	Modifications	ΔCn	Area	XCorr	Charge	MH+ [Da]	ΔM [ppm]	RT [min]	# Missed Cleavages
	High	AGYAAGVAcDSGTNNAEcK	2	34	34	unk	C9(Carbamidomethyl); C18(Carbamidomethyl)	0	2.68503e+07	3.33034	2	1915.79	0.420894	23.7195	0
	High	VYRDIVNAVSTK	1	34	34	unk		0	63319012	2.80683	3	1364.75	-2.05121	29.0986	1
	High	cTIEPAYTSGDAFTK	1	34	34	unk	C1(Carbamidomethyl)	0	3.45028e+07	2.29185	2	1660.75	-1.91612	32.4537	0
unk	len=1024 - [Mii61805_c3_g10_i1_4]	11.6968	13.49	1	0	3	4	4.15573e+07	341	36.7965	6.96143
	A2	Sequence	# PSMs	# Proteins	# Protein Groups	Protein Group Accessions	Modifications	ΔCn	Area	XCorr	Charge	MH+ [Da]	ΔM [ppm]	RT [min]	# Missed Cleavages
	High	AGYAAGVAcDSGTNNAEcK	2	34	34	unk	C9(Carbamidomethyl); C18(Carbamidomethyl)	0	2.68503e+07	3.33034	2	1915.79	0.420894	23.7195	0
	High	VYRDIVNAVSTK	1	34	34	unk		0	63319012	2.80683	3	1364.75	-2.05121	29.0986	1
	High	cTIEPAYTSGDAFTK	1	34	34	unk	C1(Carbamidomethyl)	0	3.45028e+07	2.29185	2	1660.75	-1.91612	32.4537	0
unk	len=1039 - [Mii61805_c3_g11_i1_4]	11.6968	13.29	1	0	3	4	4.15573e+07	346	37.4088	7.1958
	A2	Sequence	# PSMs	# Proteins	# Protein Groups	Protein Group Accessions	Modifications	ΔCn	Area	XCorr	Charge	MH+ [Da]	ΔM [ppm]	RT [min]	# Missed Cleavages
	High	AGYAAGVAcDSGTNNAEcK	2	34	34	unk	C9(Carbamidomethyl); C18(Carbamidomethyl)	0	2.68503e+07	3.33034	2	1915.79	0.420894	23.7195	0
	High	VYRDIVNAVSTK	1	34	34	unk		0	63319012	2.80683	3	1364.75	-2.05121	29.0986	1
	High	cTIEPAYTSGDAFTK	1	34	34	unk	C1(Carbamidomethyl)	0	3.45028e+07	2.29185	2	1660.75	-1.91612	32.4537	0
unk	len=1021 - [Mii61805_c3_g12_i1_4]	11.6968	13.53	1	0	3	4	4.15573e+07	340	36.5974	6.96143
	A2	Sequence	# PSMs	# Proteins	# Protein Groups	Protein Group Accessions	Modifications	ΔCn	Area	XCorr	Charge	MH+ [Da]	ΔM [ppm]	RT [min]	# Missed Cleavages
	High	AGYAAGVAcDSGTNNAEcK	2	34	34	unk	C9(Carbamidomethyl); C18(Carbamidomethyl)	0	2.68503e+07	3.33034	2	1915.79	0.420894	23.7195	0
	High	VYRDIVNAVSTK	1	34	34	unk		0	63319012	2.80683	3	1364.75	-2.05121	29.0986	1
	High	cTIEPAYTSGDAFTK	1	34	34	unk	C1(Carbamidomethyl)	0	3.45028e+07	2.29185	2	1660.75	-1.91612	32.4537	0
unk	len=1015 - [Mii61805_c3_g13_i1_4]	11.6968	13.61	1	0	3	4	4.15573e+07	338	36.4674	6.96143
	A2	Sequence	# PSMs	# Proteins	# Protein Groups	Protein Group Accessions	Modifications	ΔCn	Area	XCorr	Charge	MH+ [Da]	ΔM [ppm]	RT [min]	# Missed Cleavages
	High	AGYAAGVAcDSGTNNAEcK	2	34	34	unk	C9(Carbamidomethyl); C18(Carbamidomethyl)	0	2.68503e+07	3.33034	2	1915.79	0.420894	23.7195	0
	High	VYRDIVNAVSTK	1	34	34	unk		0	63319012	2.80683	3	1364.75	-2.05121	29.0986	1
	High	cTIEPAYTSGDAFTK	1	34	34	unk	C1(Carbamidomethyl)	0	3.45028e+07	2.29185	2	1660.75	-1.91612	32.4537	0
unk	len=1024 - [Mii61805_c3_g14_i1_4]	11.6968	13.49	1	0	3	4	4.15573e+07	341	36.8376	7.1958
	A2	Sequence	# PSMs	# Proteins	# Protein Groups	Protein Group Accessions	Modifications	ΔCn	Area	XCorr	Charge	MH+ [Da]	ΔM [ppm]	RT [min]	# Missed Cleavages
	High	AGYAAGVAcDSGTNNAEcK	2	34	34	unk	C9(Carbamidomethyl); C18(Carbamidomethyl)	0	2.68503e+07	3.33034	2	1915.79	0.420894	23.7195	0
	High	VYRDIVNAVSTK	1	34	34	unk		0	63319012	2.80683	3	1364.75	-2.05121	29.0986	1
	High	cTIEPAYTSGDAFTK	1	34	34	unk	C1(Carbamidomethyl)	0	3.45028e+07	2.29185	2	1660.75	-1.91612	32.4537	0
unk	len=1021 - [Mii61805_c3_g16_i1_4]	11.6968	13.53	1	0	3	4	4.15573e+07	340	36.6294	6.72705
	A2	Sequence	# PSMs	# Proteins	# Protein Groups	Protein Group Accessions	Modifications	ΔCn	Area	XCorr	Charge	MH+ [Da]	ΔM [ppm]	RT [min]	# Missed Cleavages
	High	AGYAAGVAcDSGTNNAEcK	2	34	34	unk	C9(Carbamidomethyl); C18(Carbamidomethyl)	0	2.68503e+07	3.33034	2	1915.79	0.420894	23.7195	0
	High	VYRDIVNAVSTK	1	34	34	unk		0	63319012	2.80683	3	1364.75	-2.05121	29.0986	1
	High	cTIEPAYTSGDAFTK	1	34	34	unk	C1(Carbamidomethyl)	0	3.45028e+07	2.29185	2	1660.75	-1.91612	32.4537	0
unk	len=1021 - [Mii61805_c3_g17_i1_4]	11.6968	13.53	1	0	3	4	4.15573e+07	340	36.7015	6.96143
	A2	Sequence	# PSMs	# Proteins	# Protein Groups	Protein Group Accessions	Modifications	ΔCn	Area	XCorr	Charge	MH+ [Da]	ΔM [ppm]	RT [min]	# Missed Cleavages
	High	AGYAAGVAcDSGTNNAEcK	2	34	34	unk	C9(Carbamidomethyl); C18(Carbamidomethyl)	0	2.68503e+07	3.33034	2	1915.79	0.420894	23.7195	0
	High	VYRDIVNAVSTK	1	34	34	unk		0	63319012	2.80683	3	1364.75	-2.05121	29.0986	1
	High	cTIEPAYTSGDAFTK	1	34	34	unk	C1(Carbamidomethyl)	0	3.45028e+07	2.29185	2	1660.75	-1.91612	32.4537	0
unk	len=1021 - [Mii61805_c3_g19_i1_4]	11.6968	13.53	1	0	3	4	4.15573e+07	340	36.6254	6.96143
	A2	Sequence	# PSMs	# Proteins	# Protein Groups	Protein Group Accessions	Modifications	ΔCn	Area	XCorr	Charge	MH+ [Da]	ΔM [ppm]	RT [min]	# Missed Cleavages
	High	AGYAAGVAcDSGTNNAEcK	2	34	34	unk	C9(Carbamidomethyl); C18(Carbamidomethyl)	0	2.68503e+07	3.33034	2	1915.79	0.420894	23.7195	0
	High	VYRDIVNAVSTK	1	34	34	unk		0	63319012	2.80683	3	1364.75	-2.05121	29.0986	1
	High	cTIEPAYTSGDAFTK	1	34	34	unk	C1(Carbamidomethyl)	0	3.45028e+07	2.29185	2	1660.75	-1.91612	32.4537	0
unk	len=1021 - [Mii61805_c3_g20_i1_4]	11.6968	13.53	1	0	3	4	4.15573e+07	340	36.6714	6.72705
	A2	Sequence	# PSMs	# Proteins	# Protein Groups	Protein Group Accessions	Modifications	ΔCn	Area	XCorr	Charge	MH+ [Da]	ΔM [ppm]	RT [min]	# Missed Cleavages
	High	AGYAAGVAcDSGTNNAEcK	2	34	34	unk	C9(Carbamidomethyl); C18(Carbamidomethyl)	0	2.68503e+07	3.33034	2	1915.79	0.420894	23.7195	0
	High	VYRDIVNAVSTK	1	34	34	unk		0	63319012	2.80683	3	1364.75	-2.05121	29.0986	1
	High	cTIEPAYTSGDAFTK	1	34	34	unk	C1(Carbamidomethyl)	0	3.45028e+07	2.29185	2	1660.75	-1.91612	32.4537	0
unk	len=1024 - [Mii61805_c3_g21_i1_4]	11.6968	13.49	1	0	3	4	4.15573e+07	341	36.8396	7.1958
	A2	Sequence	# PSMs	# Proteins	# Protein Groups	Protein Group Accessions	Modifications	ΔCn	Area	XCorr	Charge	MH+ [Da]	ΔM [ppm]	RT [min]	# Missed Cleavages
	High	AGYAAGVAcDSGTNNAEcK	2	34	34	unk	C9(Carbamidomethyl); C18(Carbamidomethyl)	0	2.68503e+07	3.33034	2	1915.79	0.420894	23.7195	0
	High	VYRDIVNAVSTK	1	34	34	unk		0	63319012	2.80683	3	1364.75	-2.05121	29.0986	1
	High	cTIEPAYTSGDAFTK	1	34	34	unk	C1(Carbamidomethyl)	0	3.45028e+07	2.29185	2	1660.75	-1.91612	32.4537	0
unk	len=1021 - [Mii61805_c3_g22_i1_4]	11.6968	13.53	1	0	3	4	4.15573e+07	340	36.6705	6.96143
	A2	Sequence	# PSMs	# Proteins	# Protein Groups	Protein Group Accessions	Modifications	ΔCn	Area	XCorr	Charge	MH+ [Da]	ΔM [ppm]	RT [min]	# Missed Cleavages
	High	AGYAAGVAcDSGTNNAEcK	2	34	34	unk	C9(Carbamidomethyl); C18(Carbamidomethyl)	0	2.68503e+07	3.33034	2	1915.79	0.420894	23.7195	0
	High	VYRDIVNAVSTK	1	34	34	unk		0	63319012	2.80683	3	1364.75	-2.05121	29.0986	1
	High	cTIEPAYTSGDAFTK	1	34	34	unk	C1(Carbamidomethyl)	0	3.45028e+07	2.29185	2	1660.75	-1.91612	32.4537	0
unk	len=987 - [Mii61805_c3_g23_i1_6]	11.6968	14.02	1	0	3	4	4.15573e+07	328	35.2687	6.96143
	A2	Sequence	# PSMs	# Proteins	# Protein Groups	Protein Group Accessions	Modifications	ΔCn	Area	XCorr	Charge	MH+ [Da]	ΔM [ppm]	RT [min]	# Missed Cleavages
	High	AGYAAGVAcDSGTNNAEcK	2	34	34	unk	C9(Carbamidomethyl); C18(Carbamidomethyl)	0	2.68503e+07	3.33034	2	1915.79	0.420894	23.7195	0
	High	VYRDIVNAVSTK	1	34	34	unk		0	63319012	2.80683	3	1364.75	-2.05121	29.0986	1
	High	cTIEPAYTSGDAFTK	1	34	34	unk	C1(Carbamidomethyl)	0	3.45028e+07	2.29185	2	1660.75	-1.91612	32.4537	0
unk	len=1034 - [Mii61805_c3_g24_i1_5]	11.6968	13.37	1	0	3	4	4.15573e+07	344	37.1527	7.1958
	A2	Sequence	# PSMs	# Proteins	# Protein Groups	Protein Group Accessions	Modifications	ΔCn	Area	XCorr	Charge	MH+ [Da]	ΔM [ppm]	RT [min]	# Missed Cleavages
	High	AGYAAGVAcDSGTNNAEcK	2	34	34	unk	C9(Carbamidomethyl); C18(Carbamidomethyl)	0	2.68503e+07	3.33034	2	1915.79	0.420894	23.7195	0
	High	VYRDIVNAVSTK	1	34	34	unk		0	63319012	2.80683	3	1364.75	-2.05121	29.0986	1
	High	cTIEPAYTSGDAFTK	1	34	34	unk	C1(Carbamidomethyl)	0	3.45028e+07	2.29185	2	1660.75	-1.91612	32.4537	0
unk	len=1021 - [Mii61805_c3_g27_i1_4]	11.6968	13.53	1	0	3	4	4.15573e+07	340	36.6024	6.72705
	A2	Sequence	# PSMs	# Proteins	# Protein Groups	Protein Group Accessions	Modifications	ΔCn	Area	XCorr	Charge	MH+ [Da]	ΔM [ppm]	RT [min]	# Missed Cleavages
	High	AGYAAGVAcDSGTNNAEcK	2	34	34	unk	C9(Carbamidomethyl); C18(Carbamidomethyl)	0	2.68503e+07	3.33034	2	1915.79	0.420894	23.7195	0
	High	VYRDIVNAVSTK	1	34	34	unk		0	63319012	2.80683	3	1364.75	-2.05121	29.0986	1
	High	cTIEPAYTSGDAFTK	1	34	34	unk	C1(Carbamidomethyl)	0	3.45028e+07	2.29185	2	1660.75	-1.91612	32.4537	0
unk	len=1034 - [Mii61805_c3_g29_i1_5]	11.6968	13.37	1	0	3	4	4.15573e+07	344	37.1817	7.41553
	A2	Sequence	# PSMs	# Proteins	# Protein Groups	Protein Group Accessions	Modifications	ΔCn	Area	XCorr	Charge	MH+ [Da]	ΔM [ppm]	RT [min]	# Missed Cleavages
	High	AGYAAGVAcDSGTNNAEcK	2	34	34	unk	C9(Carbamidomethyl); C18(Carbamidomethyl)	0	2.68503e+07	3.33034	2	1915.79	0.420894	23.7195	0
	High	VYRDIVNAVSTK	1	34	34	unk		0	63319012	2.80683	3	1364.75	-2.05121	29.0986	1
	High	cTIEPAYTSGDAFTK	1	34	34	unk	C1(Carbamidomethyl)	0	3.45028e+07	2.29185	2	1660.75	-1.91612	32.4537	0
unk	len=1021 - [Mii61805_c3_g31_i1_4]	11.6968	13.53	1	0	3	4	4.15573e+07	340	36.7285	6.96143
	A2	Sequence	# PSMs	# Proteins	# Protein Groups	Protein Group Accessions	Modifications	ΔCn	Area	XCorr	Charge	MH+ [Da]	ΔM [ppm]	RT [min]	# Missed Cleavages
	High	AGYAAGVAcDSGTNNAEcK	2	34	34	unk	C9(Carbamidomethyl); C18(Carbamidomethyl)	0	2.68503e+07	3.33034	2	1915.79	0.420894	23.7195	0
	High	VYRDIVNAVSTK	1	34	34	unk		0	63319012	2.80683	3	1364.75	-2.05121	29.0986	1
	High	cTIEPAYTSGDAFTK	1	34	34	unk	C1(Carbamidomethyl)	0	3.45028e+07	2.29185	2	1660.75	-1.91612	32.4537	0
unk	len=1034 - [Mii61805_c3_g32_i1_5]	11.6968	13.37	1	0	3	4	4.15573e+07	344	37.2097	7.41553
	A2	Sequence	# PSMs	# Proteins	# Protein Groups	Protein Group Accessions	Modifications	ΔCn	Area	XCorr	Charge	MH+ [Da]	ΔM [ppm]	RT [min]	# Missed Cleavages
	High	AGYAAGVAcDSGTNNAEcK	2	34	34	unk	C9(Carbamidomethyl); C18(Carbamidomethyl)	0	2.68503e+07	3.33034	2	1915.79	0.420894	23.7195	0
	High	VYRDIVNAVSTK	1	34	34	unk		0	63319012	2.80683	3	1364.75	-2.05121	29.0986	1
	High	cTIEPAYTSGDAFTK	1	34	34	unk	C1(Carbamidomethyl)	0	3.45028e+07	2.29185	2	1660.75	-1.91612	32.4537	0
unk	len=1024 - [Mii61805_c3_g33_i1_4]	11.6968	13.49	1	0	3	4	4.15573e+07	341	36.8105	6.96143
	A2	Sequence	# PSMs	# Proteins	# Protein Groups	Protein Group Accessions	Modifications	ΔCn	Area	XCorr	Charge	MH+ [Da]	ΔM [ppm]	RT [min]	# Missed Cleavages
	High	AGYAAGVAcDSGTNNAEcK	2	34	34	unk	C9(Carbamidomethyl); C18(Carbamidomethyl)	0	2.68503e+07	3.33034	2	1915.79	0.420894	23.7195	0
	High	VYRDIVNAVSTK	1	34	34	unk		0	63319012	2.80683	3	1364.75	-2.05121	29.0986	1
	High	cTIEPAYTSGDAFTK	1	34	34	unk	C1(Carbamidomethyl)	0	3.45028e+07	2.29185	2	1660.75	-1.91612	32.4537	0
unk	len=1039 - [Mii61805_c3_g36_i1_4]	11.6968	13.29	1	0	3	4	4.15573e+07	346	37.4388	7.1958
	A2	Sequence	# PSMs	# Proteins	# Protein Groups	Protein Group Accessions	Modifications	ΔCn	Area	XCorr	Charge	MH+ [Da]	ΔM [ppm]	RT [min]	# Missed Cleavages
	High	AGYAAGVAcDSGTNNAEcK	2	34	34	unk	C9(Carbamidomethyl); C18(Carbamidomethyl)	0	2.68503e+07	3.33034	2	1915.79	0.420894	23.7195	0
	High	VYRDIVNAVSTK	1	34	34	unk		0	63319012	2.80683	3	1364.75	-2.05121	29.0986	1
	High	cTIEPAYTSGDAFTK	1	34	34	unk	C1(Carbamidomethyl)	0	3.45028e+07	2.29185	2	1660.75	-1.91612	32.4537	0
unk	len=1039 - [Mii61805_c3_g37_i1_4]	11.6968	13.29	1	0	3	4	4.15573e+07	346	37.4668	7.1958
	A2	Sequence	# PSMs	# Proteins	# Protein Groups	Protein Group Accessions	Modifications	ΔCn	Area	XCorr	Charge	MH+ [Da]	ΔM [ppm]	RT [min]	# Missed Cleavages
	High	AGYAAGVAcDSGTNNAEcK	2	34	34	unk	C9(Carbamidomethyl); C18(Carbamidomethyl)	0	2.68503e+07	3.33034	2	1915.79	0.420894	23.7195	0
	High	VYRDIVNAVSTK	1	34	34	unk		0	63319012	2.80683	3	1364.75	-2.05121	29.0986	1
	High	cTIEPAYTSGDAFTK	1	34	34	unk	C1(Carbamidomethyl)	0	3.45028e+07	2.29185	2	1660.75	-1.91612	32.4537	0
unk	len=1034 - [Mii61805_c3_g38_i1_5]	11.6968	13.37	1	0	3	4	4.15573e+07	344	37.1827	7.41553
	A2	Sequence	# PSMs	# Proteins	# Protein Groups	Protein Group Accessions	Modifications	ΔCn	Area	XCorr	Charge	MH+ [Da]	ΔM [ppm]	RT [min]	# Missed Cleavages
	High	AGYAAGVAcDSGTNNAEcK	2	34	34	unk	C9(Carbamidomethyl); C18(Carbamidomethyl)	0	2.68503e+07	3.33034	2	1915.79	0.420894	23.7195	0
	High	VYRDIVNAVSTK	1	34	34	unk		0	63319012	2.80683	3	1364.75	-2.05121	29.0986	1
	High	cTIEPAYTSGDAFTK	1	34	34	unk	C1(Carbamidomethyl)	0	3.45028e+07	2.29185	2	1660.75	-1.91612	32.4537	0
unk	len=1024 - [Mii61805_c3_g39_i1_4]	11.6968	13.49	1	0	3	4	4.15573e+07	341	36.8406	7.1958
	A2	Sequence	# PSMs	# Proteins	# Protein Groups	Protein Group Accessions	Modifications	ΔCn	Area	XCorr	Charge	MH+ [Da]	ΔM [ppm]	RT [min]	# Missed Cleavages
	High	AGYAAGVAcDSGTNNAEcK	2	34	34	unk	C9(Carbamidomethyl); C18(Carbamidomethyl)	0	2.68503e+07	3.33034	2	1915.79	0.420894	23.7195	0
	High	VYRDIVNAVSTK	1	34	34	unk		0	63319012	2.80683	3	1364.75	-2.05121	29.0986	1
	High	cTIEPAYTSGDAFTK	1	34	34	unk	C1(Carbamidomethyl)	0	3.45028e+07	2.29185	2	1660.75	-1.91612	32.4537	0
unk	len=1024 - [Mii61805_c3_g45_i1_4]	11.6968	13.49	1	0	3	4	4.15573e+07	341	36.8236	7.1958
	A2	Sequence	# PSMs	# Proteins	# Protein Groups	Protein Group Accessions	Modifications	ΔCn	Area	XCorr	Charge	MH+ [Da]	ΔM [ppm]	RT [min]	# Missed Cleavages
	High	AGYAAGVAcDSGTNNAEcK	2	34	34	unk	C9(Carbamidomethyl); C18(Carbamidomethyl)	0	2.68503e+07	3.33034	2	1915.79	0.420894	23.7195	0
	High	VYRDIVNAVSTK	1	34	34	unk		0	63319012	2.80683	3	1364.75	-2.05121	29.0986	1
	High	cTIEPAYTSGDAFTK	1	34	34	unk	C1(Carbamidomethyl)	0	3.45028e+07	2.29185	2	1660.75	-1.91612	32.4537	0
unk	len=1034 - [Mii61805_c3_g46_i1_5]	11.6968	13.37	1	0	3	4	4.15573e+07	344	37.1797	7.41553
	A2	Sequence	# PSMs	# Proteins	# Protein Groups	Protein Group Accessions	Modifications	ΔCn	Area	XCorr	Charge	MH+ [Da]	ΔM [ppm]	RT [min]	# Missed Cleavages
	High	AGYAAGVAcDSGTNNAEcK	2	34	34	unk	C9(Carbamidomethyl); C18(Carbamidomethyl)	0	2.68503e+07	3.33034	2	1915.79	0.420894	23.7195	0
	High	VYRDIVNAVSTK	1	34	34	unk		0	63319012	2.80683	3	1364.75	-2.05121	29.0986	1
	High	cTIEPAYTSGDAFTK	1	34	34	unk	C1(Carbamidomethyl)	0	3.45028e+07	2.29185	2	1660.75	-1.91612	32.4537	0
unk	len=913 - [Mii65436_c1_g1_i1_2]	11.6968	15.13	1	0	3	4	4.15573e+07	304	32.3014	7.1958
	A2	Sequence	# PSMs	# Proteins	# Protein Groups	Protein Group Accessions	Modifications	ΔCn	Area	XCorr	Charge	MH+ [Da]	ΔM [ppm]	RT [min]	# Missed Cleavages
	High	AGYAAGVAcDSGTNNAEcK	2	34	34	unk	C9(Carbamidomethyl); C18(Carbamidomethyl)	0	2.68503e+07	3.33034	2	1915.79	0.420894	23.7195	0
	High	VYRDIVNAVSTK	1	34	34	unk		0	63319012	2.80683	3	1364.75	-2.05121	29.0986	1
	High	cTIEPAYTSGDAFTK	1	34	34	unk	C1(Carbamidomethyl)	0	3.45028e+07	2.29185	2	1660.75	-1.91612	32.4537	0
unk	len=657 - [Mii70376_c0_g1_i1_2]	6.35435	9.13	1	0	2	2	71833307	219	23.3308	4.51318
	A2	Sequence	# PSMs	# Proteins	# Protein Groups	Protein Group Accessions	Modifications	ΔCn	Area	XCorr	Charge	MH+ [Da]	ΔM [ppm]	RT [min]	# Missed Cleavages
	High	TDLIPKDNIDISFPNNPERK	1	2	2	unk		0	0	3.21265	4	2326.2	-1.51458	37.0739	2
	High	TDLIPKDNIDISFPNNPER	1	2	2	unk		0	71833307	3.14171	3	2198.11	0.0412201	39.0066	1
unk	len=650 - [Mii70376_c0_g1_i2_1]	6.35435	9.22	1	0	2	2	71833307	217	23.1206	4.4624
	A2	Sequence	# PSMs	# Proteins	# Protein Groups	Protein Group Accessions	Modifications	ΔCn	Area	XCorr	Charge	MH+ [Da]	ΔM [ppm]	RT [min]	# Missed Cleavages
	High	TDLIPKDNIDISFPNNPERK	1	2	2	unk		0	0	3.21265	4	2326.2	-1.51458	37.0739	2
	High	TDLIPKDNIDISFPNNPER	1	2	2	unk		0	71833307	3.14171	3	2198.11	0.0412201	39.0066	1
unk	len=1345 - [Mii41466_c0_g1_i1_1]	5.08941	6.03	1	0	2	2	1.33699e+08	448	50.1079	5.8208
	A2	Sequence	# PSMs	# Proteins	# Protein Groups	Protein Group Accessions	Modifications	ΔCn	Area	XCorr	Charge	MH+ [Da]	ΔM [ppm]	RT [min]	# Missed Cleavages
	High	AVFPSIVGRPR	1	19	19	unk		0	2.17103e+08	2.55431	3	1198.71	0.482666	32.9138	0
	High	SYELPDGQVITIGNER	1	31	31	unk		0	50294121	2.5351	2	1790.9	3.76232	40.104	0
unk	len=1306 - [Mii48937_c0_g1_i1_6]	5.08941	6.22	1	0	2	2	1.33699e+08	434	48.6471	6.3667
	A2	Sequence	# PSMs	# Proteins	# Protein Groups	Protein Group Accessions	Modifications	ΔCn	Area	XCorr	Charge	MH+ [Da]	ΔM [ppm]	RT [min]	# Missed Cleavages
	High	AVFPSIVGRPR	1	19	19	unk		0	2.17103e+08	2.55431	3	1198.71	0.482666	32.9138	0
	High	SYELPDGQVITIGNER	1	31	31	unk		0	50294121	2.5351	2	1790.9	3.76232	40.104	0
unk	len=1531 - [Mii55690_c0_g1_i1_4]	5.08941	5.29	1	0	2	2	1.33699e+08	510	57.7905	7.26904
	A2	Sequence	# PSMs	# Proteins	# Protein Groups	Protein Group Accessions	Modifications	ΔCn	Area	XCorr	Charge	MH+ [Da]	ΔM [ppm]	RT [min]	# Missed Cleavages
	High	AVFPSIVGRPR	1	19	19	unk		0	2.17103e+08	2.55431	3	1198.71	0.482666	32.9138	0
	High	SYELPDGQVITIGNER	1	31	31	unk		0	50294121	2.5351	2	1790.9	3.76232	40.104	0
unk	len=1457 - [Mii55690_c0_g2_i1_5]	5.08941	5.57	1	0	2	2	1.33699e+08	485	54.6403	6.60986
	A2	Sequence	# PSMs	# Proteins	# Protein Groups	Protein Group Accessions	Modifications	ΔCn	Area	XCorr	Charge	MH+ [Da]	ΔM [ppm]	RT [min]	# Missed Cleavages
	High	AVFPSIVGRPR	1	19	19	unk		0	2.17103e+08	2.55431	3	1198.71	0.482666	32.9138	0
	High	SYELPDGQVITIGNER	1	31	31	unk		0	50294121	2.5351	2	1790.9	3.76232	40.104	0
unk	len=1101 - [Mii55980_c0_g1_i1_6]	5.08941	7.36	1	0	2	2	1.33699e+08	367	41.2104	5.46533
	A2	Sequence	# PSMs	# Proteins	# Protein Groups	Protein Group Accessions	Modifications	ΔCn	Area	XCorr	Charge	MH+ [Da]	ΔM [ppm]	RT [min]	# Missed Cleavages
	High	AVFPSIVGRPR	1	19	19	unk		0	2.17103e+08	2.55431	3	1198.71	0.482666	32.9138	0
	High	SYELPDGQVITIGNER	1	31	31	unk		0	50294121	2.5351	2	1790.9	3.76232	40.104	0
unk	len=946 - [Mii64514_c0_g1_i1_1]	5.08941	8.57	1	0	2	2	1.33699e+08	315	35.2403	5.18604
	A2	Sequence	# PSMs	# Proteins	# Protein Groups	Protein Group Accessions	Modifications	ΔCn	Area	XCorr	Charge	MH+ [Da]	ΔM [ppm]	RT [min]	# Missed Cleavages
	High	AVFPSIVGRPR	1	19	19	unk		0	2.17103e+08	2.55431	3	1198.71	0.482666	32.9138	0
	High	SYELPDGQVITIGNER	1	31	31	unk		0	50294121	2.5351	2	1790.9	3.76232	40.104	0
unk	len=749 - [Mii41932_c0_g1_i1_1]	4.93724	4.44	1	0	1	2	47784395	248	28.0322	7.09326
	A2	Sequence	# PSMs	# Proteins	# Protein Groups	Protein Group Accessions	Modifications	ΔCn	Area	XCorr	Charge	MH+ [Da]	ΔM [ppm]	RT [min]	# Missed Cleavages
	High	QITVNDLPVGR	2	5	5	unk		0	47784395	2.52613	2	1211.68	3.46057	33.8635	0
unk	len=982 - [Mii41932_c0_g1_i2_3]	4.93724	3.38	1	0	1	2	47784395	325	36.6965	8.26514
	A2	Sequence	# PSMs	# Proteins	# Protein Groups	Protein Group Accessions	Modifications	ΔCn	Area	XCorr	Charge	MH+ [Da]	ΔM [ppm]	RT [min]	# Missed Cleavages
	High	QITVNDLPVGR	2	5	5	unk		0	47784395	2.52613	2	1211.68	3.46057	33.8635	0
unk	len=1093 - [Mii74043_c5_g3_i1_6]	4.93724	3.03	1	0	1	2	47784395	363	41.893	8.6167
	A2	Sequence	# PSMs	# Proteins	# Protein Groups	Protein Group Accessions	Modifications	ΔCn	Area	XCorr	Charge	MH+ [Da]	ΔM [ppm]	RT [min]	# Missed Cleavages
	High	QITVNDLPVGR	2	5	5	unk		0	47784395	2.52613	2	1211.68	3.46057	33.8635	0
unk	len=1374 - [Mii74043_c5_g3_i2_6]	4.93724	2.41	1	0	1	2	47784395	457	52.2182	8.71924
	A2	Sequence	# PSMs	# Proteins	# Protein Groups	Protein Group Accessions	Modifications	ΔCn	Area	XCorr	Charge	MH+ [Da]	ΔM [ppm]	RT [min]	# Missed Cleavages
	High	QITVNDLPVGR	2	5	5	unk		0	47784395	2.52613	2	1211.68	3.46057	33.8635	0
unk	len=1211 - [Mii74043_c5_g3_i3_6]	4.93724	2.73	1	0	1	2	47784395	403	46.6465	9.0708
	A2	Sequence	# PSMs	# Proteins	# Protein Groups	Protein Group Accessions	Modifications	ΔCn	Area	XCorr	Charge	MH+ [Da]	ΔM [ppm]	RT [min]	# Missed Cleavages
	High	QITVNDLPVGR	2	5	5	unk		0	47784395	2.52613	2	1211.68	3.46057	33.8635	0
unk	len=359 - [Mii15957_c0_g1_i1_6]	3.2845	11.86	1	0	1	1	7.57072e+07	118	13.2969	5.79541
	A2	Sequence	# PSMs	# Proteins	# Protein Groups	Protein Group Accessions	Modifications	ΔCn	Area	XCorr	Charge	MH+ [Da]	ΔM [ppm]	RT [min]	# Missed Cleavages
	High	NLDIERPTYTNLNR	1	31	31	unk		0	7.57072e+07	3.2845	3	1718.89	3.92509	31.8575	0
unk	len=426 - [Mii24072_c0_g1_i1_6]	3.2845	9.93	1	0	1	1	7.57072e+07	141	15.9248	5.78271
	A2	Sequence	# PSMs	# Proteins	# Protein Groups	Protein Group Accessions	Modifications	ΔCn	Area	XCorr	Charge	MH+ [Da]	ΔM [ppm]	RT [min]	# Missed Cleavages
	High	NLDIERPTYTNLNR	1	31	31	unk		0	7.57072e+07	3.2845	3	1718.89	3.92509	31.8575	0
unk	len=922 - [Mii40167_c0_g1_i1_5]	3.2845	4.56	1	0	1	1	7.57072e+07	307	34.0829	5.47803
	A2	Sequence	# PSMs	# Proteins	# Protein Groups	Protein Group Accessions	Modifications	ΔCn	Area	XCorr	Charge	MH+ [Da]	ΔM [ppm]	RT [min]	# Missed Cleavages
	High	NLDIERPTYTNLNR	1	31	31	unk		0	7.57072e+07	3.2845	3	1718.89	3.92509	31.8575	0
unk	len=384 - [Mii46234_c0_g1_i1_4]	3.2845	10.94	1	0	1	1	7.57072e+07	128	15.1747	9.77393
	A2	Sequence	# PSMs	# Proteins	# Protein Groups	Protein Group Accessions	Modifications	ΔCn	Area	XCorr	Charge	MH+ [Da]	ΔM [ppm]	RT [min]	# Missed Cleavages
	High	NLDIERPTYTNLNR	1	31	31	unk		0	7.57072e+07	3.2845	3	1718.89	3.92509	31.8575	0
unk	len=366 - [Mii46632_c0_g1_i1_2]	3.2845	11.57	1	0	1	1	7.57072e+07	121	13.4197	6.27783
	A2	Sequence	# PSMs	# Proteins	# Protein Groups	Protein Group Accessions	Modifications	ΔCn	Area	XCorr	Charge	MH+ [Da]	ΔM [ppm]	RT [min]	# Missed Cleavages
	High	NLDIERPTYTNLNR	1	31	31	unk		0	7.57072e+07	3.2845	3	1718.89	3.92509	31.8575	0
unk	len=814 - [Mii46632_c0_g1_i2_3]	3.2845	5.19	1	0	1	1	7.57072e+07	270	29.7619	5.43994
	A2	Sequence	# PSMs	# Proteins	# Protein Groups	Protein Group Accessions	Modifications	ΔCn	Area	XCorr	Charge	MH+ [Da]	ΔM [ppm]	RT [min]	# Missed Cleavages
	High	NLDIERPTYTNLNR	1	31	31	unk		0	7.57072e+07	3.2845	3	1718.89	3.92509	31.8575	0
unk	len=680 - [Mii56121_c0_g1_i1_6]	3.2845	6.19	1	0	1	1	7.57072e+07	226	26.2769	9.62744
	A2	Sequence	# PSMs	# Proteins	# Protein Groups	Protein Group Accessions	Modifications	ΔCn	Area	XCorr	Charge	MH+ [Da]	ΔM [ppm]	RT [min]	# Missed Cleavages
	High	NLDIERPTYTNINR	1	31	31	unk		0	7.57072e+07	3.2845	3	1718.89	3.92509	31.8575	0
unk	len=786 - [Mii57421_c0_g1_i1_2]	3.2845	5.34	1	0	1	1	7.57072e+07	262	29.2168	6.41748
	A2	Sequence	# PSMs	# Proteins	# Protein Groups	Protein Group Accessions	Modifications	ΔCn	Area	XCorr	Charge	MH+ [Da]	ΔM [ppm]	RT [min]	# Missed Cleavages
	High	NLDIERPTYTNINR	1	31	31	unk		0	7.57072e+07	3.2845	3	1718.89	3.92509	31.8575	0
unk	len=894 - [Mii57421_c0_g1_i2_2]	3.2845	4.7	1	0	1	1	7.57072e+07	298	33.3729	6.97607
	A2	Sequence	# PSMs	# Proteins	# Protein Groups	Protein Group Accessions	Modifications	ΔCn	Area	XCorr	Charge	MH+ [Da]	ΔM [ppm]	RT [min]	# Missed Cleavages
	High	NLDIERPTYTNINR	1	31	31	unk		0	7.57072e+07	3.2845	3	1718.89	3.92509	31.8575	0
unk	len=1148 - [Mii57421_c0_g1_i3_1]	3.2845	3.66	1	0	1	1	7.57072e+07	383	42.7075	6.82959
	A2	Sequence	# PSMs	# Proteins	# Protein Groups	Protein Group Accessions	Modifications	ΔCn	Area	XCorr	Charge	MH+ [Da]	ΔM [ppm]	RT [min]	# Missed Cleavages
	High	NLDIERPTYTNINR	1	31	31	unk		0	7.57072e+07	3.2845	3	1718.89	3.92509	31.8575	0
unk	len=1554 - [Mii60785_c0_g1_i2_4]	3.2845	2.7	1	0	1	1	7.57072e+07	518	57.8397	6.0874
	A2	Sequence	# PSMs	# Proteins	# Protein Groups	Protein Group Accessions	Modifications	ΔCn	Area	XCorr	Charge	MH+ [Da]	ΔM [ppm]	RT [min]	# Missed Cleavages
	High	NLDIERPTYTNLNR	1	31	31	unk		0	7.57072e+07	3.2845	3	1718.89	3.92509	31.8575	0
unk	len=1387 - [Mii61472_c0_g1_i1_5]	3.2845	3.03	1	0	1	1	7.57072e+07	462	51.7669	6.75635
	A2	Sequence	# PSMs	# Proteins	# Protein Groups	Protein Group Accessions	Modifications	ΔCn	Area	XCorr	Charge	MH+ [Da]	ΔM [ppm]	RT [min]	# Missed Cleavages
	High	NLDIERPTYTNINR	1	31	31	unk		0	7.57072e+07	3.2845	3	1718.89	3.92509	31.8575	0
unk	len=1953 - [Mii65146_c0_g1_i1_6]	3.2845	2.15	1	0	1	1	7.57072e+07	651	73.7673	5.46533
	A2	Sequence	# PSMs	# Proteins	# Protein Groups	Protein Group Accessions	Modifications	ΔCn	Area	XCorr	Charge	MH+ [Da]	ΔM [ppm]	RT [min]	# Missed Cleavages
	High	NLDIERPTYTNLNR	1	31	31	unk		0	7.57072e+07	3.2845	3	1718.89	3.92509	31.8575	0
unk	len=822 - [Mii65987_c0_g1_i1_3]	3.2845	5.13	1	0	1	1	7.57072e+07	273	30.7553	6.15088
	A2	Sequence	# PSMs	# Proteins	# Protein Groups	Protein Group Accessions	Modifications	ΔCn	Area	XCorr	Charge	MH+ [Da]	ΔM [ppm]	RT [min]	# Missed Cleavages
	High	NLDIERPTYTNLNR	1	31	31	unk		0	7.57072e+07	3.2845	3	1718.89	3.92509	31.8575	0
unk	len=377 - [Mii65987_c0_g1_i2_3]	3.2845	11.2	1	0	1	1	7.57072e+07	125	14.2261	5.42725
	A2	Sequence	# PSMs	# Proteins	# Protein Groups	Protein Group Accessions	Modifications	ΔCn	Area	XCorr	Charge	MH+ [Da]	ΔM [ppm]	RT [min]	# Missed Cleavages
	High	NLDIERPTYTNLNR	1	31	31	unk		0	7.57072e+07	3.2845	3	1718.89	3.92509	31.8575	0
unk	len=1300 - [Mii65987_c1_g1_i1_4]	3.2845	3.23	1	0	1	1	7.57072e+07	433	48.2038	5.40186
	A2	Sequence	# PSMs	# Proteins	# Protein Groups	Protein Group Accessions	Modifications	ΔCn	Area	XCorr	Charge	MH+ [Da]	ΔM [ppm]	RT [min]	# Missed Cleavages
	High	NLDIERPTYTNLNR	1	31	31	unk		0	7.57072e+07	3.2845	3	1718.89	3.92509	31.8575	0
unk	len=1362 - [Mii65987_c1_g1_i2_4]	3.2845	3.08	1	0	1	1	7.57072e+07	454	51.5544	7.57666
	A2	Sequence	# PSMs	# Proteins	# Protein Groups	Protein Group Accessions	Modifications	ΔCn	Area	XCorr	Charge	MH+ [Da]	ΔM [ppm]	RT [min]	# Missed Cleavages
	High	NLDIERPTYTNLNR	1	31	31	unk		0	7.57072e+07	3.2845	3	1718.89	3.92509	31.8575	0
unk	len=1711 - [Mii68344_c0_g2_i1_5]	3.2845	2.46	1	0	1	1	7.57072e+07	570	63.9528	5.90967
	A2	Sequence	# PSMs	# Proteins	# Protein Groups	Protein Group Accessions	Modifications	ΔCn	Area	XCorr	Charge	MH+ [Da]	ΔM [ppm]	RT [min]	# Missed Cleavages
	High	NLDIERPTYTNLNR	1	31	31	unk		0	7.57072e+07	3.2845	3	1718.89	3.92509	31.8575	0
unk	len=723 - [Mii68344_c0_g2_i2_6]	3.2845	5.81	1	0	1	1	7.57072e+07	241	27.2585	5.38916
	A2	Sequence	# PSMs	# Proteins	# Protein Groups	Protein Group Accessions	Modifications	ΔCn	Area	XCorr	Charge	MH+ [Da]	ΔM [ppm]	RT [min]	# Missed Cleavages
	High	NLDIERPTYTNLNR	1	31	31	unk		0	7.57072e+07	3.2845	3	1718.89	3.92509	31.8575	0
unk	len=1812 - [Mii68344_c0_g2_i3_4]	3.2845	2.32	1	0	1	1	7.57072e+07	604	67.7432	5.35107
	A2	Sequence	# PSMs	# Proteins	# Protein Groups	Protein Group Accessions	Modifications	ΔCn	Area	XCorr	Charge	MH+ [Da]	ΔM [ppm]	RT [min]	# Missed Cleavages
	High	NLDIERPTYTNLNR	1	31	31	unk		0	7.57072e+07	3.2845	3	1718.89	3.92509	31.8575	0
unk	len=1867 - [Mii70140_c0_g1_i1_5]	3.2845	2.25	1	0	1	1	7.57072e+07	622	70.1276	5.41455
	A2	Sequence	# PSMs	# Proteins	# Protein Groups	Protein Group Accessions	Modifications	ΔCn	Area	XCorr	Charge	MH+ [Da]	ΔM [ppm]	RT [min]	# Missed Cleavages
	High	NLDIERPTYTNLNR	1	31	31	unk		0	7.57072e+07	3.2845	3	1718.89	3.92509	31.8575	0
unk	len=1018 - [Mii70512_c1_g1_i1_3]	3.2845	4.14	1	0	1	1	7.57072e+07	338	37.6759	6.52197
	A2	Sequence	# PSMs	# Proteins	# Protein Groups	Protein Group Accessions	Modifications	ΔCn	Area	XCorr	Charge	MH+ [Da]	ΔM [ppm]	RT [min]	# Missed Cleavages
	High	NLDIERPTYTNLNR	1	31	31	unk		0	7.57072e+07	3.2845	3	1718.89	3.92509	31.8575	0
unk	len=1009 - [Mii70512_c1_g2_i1_3]	3.2845	4.17	1	0	1	1	7.57072e+07	336	37.4808	5.92236
	A2	Sequence	# PSMs	# Proteins	# Protein Groups	Protein Group Accessions	Modifications	ΔCn	Area	XCorr	Charge	MH+ [Da]	ΔM [ppm]	RT [min]	# Missed Cleavages
	High	NLDIERPTYTNLNR	1	31	31	unk		0	7.57072e+07	3.2845	3	1718.89	3.92509	31.8575	0
unk	len=1764 - [Mii70627_c0_g1_i1_1]	3.2845	2.38	1	0	1	1	7.57072e+07	588	66.3606	5.2876
	A2	Sequence	# PSMs	# Proteins	# Protein Groups	Protein Group Accessions	Modifications	ΔCn	Area	XCorr	Charge	MH+ [Da]	ΔM [ppm]	RT [min]	# Missed Cleavages
	High	NLDIERPTYTNLNR	1	31	31	unk		0	7.57072e+07	3.2845	3	1718.89	3.92509	31.8575	0
unk	len=1715 - [Mii70920_c2_g1_i1_3]	3.2845	2.45	1	0	1	1	7.57072e+07	571	64.2543	5.2876
	A2	Sequence	# PSMs	# Proteins	# Protein Groups	Protein Group Accessions	Modifications	ΔCn	Area	XCorr	Charge	MH+ [Da]	ΔM [ppm]	RT [min]	# Missed Cleavages
	High	NLDIERPTYTNLNR	1	31	31	unk		0	7.57072e+07	3.2845	3	1718.89	3.92509	31.8575	0
unk	len=1125 - [Mii72254_c0_g1_i1_4]	3.2845	3.73	1	0	1	1	7.57072e+07	375	41.7443	5.96045
	A2	Sequence	# PSMs	# Proteins	# Protein Groups	Protein Group Accessions	Modifications	ΔCn	Area	XCorr	Charge	MH+ [Da]	ΔM [ppm]	RT [min]	# Missed Cleavages
	High	NLDIERPTYTNLNR	1	31	31	unk		0	7.57072e+07	3.2845	3	1718.89	3.92509	31.8575	0
unk	len=1222 - [Mii72538_c1_g2_i1_1]	3.2845	3.44	1	0	1	1	7.57072e+07	407	46.0158	6.1001
	A2	Sequence	# PSMs	# Proteins	# Protein Groups	Protein Group Accessions	Modifications	ΔCn	Area	XCorr	Charge	MH+ [Da]	ΔM [ppm]	RT [min]	# Missed Cleavages
	High	NLDIERPTYTNLNR	1	31	31	unk		0	7.57072e+07	3.2845	3	1718.89	3.92509	31.8575	0
unk	len=1442 - [Mii72538_c2_g2_i1_2]	3.2845	2.92	1	0	1	1	7.57072e+07	480	53.2771	5.26221
	A2	Sequence	# PSMs	# Proteins	# Protein Groups	Protein Group Accessions	Modifications	ΔCn	Area	XCorr	Charge	MH+ [Da]	ΔM [ppm]	RT [min]	# Missed Cleavages
	High	NLDIERPTYTNLNR	1	31	31	unk		0	7.57072e+07	3.2845	3	1718.89	3.92509	31.8575	0
unk	len=1542 - [Mii72538_c2_g2_i2_2]	3.2845	2.73	1	0	1	1	7.57072e+07	513	57.4653	5.35107
	A2	Sequence	# PSMs	# Proteins	# Protein Groups	Protein Group Accessions	Modifications	ΔCn	Area	XCorr	Charge	MH+ [Da]	ΔM [ppm]	RT [min]	# Missed Cleavages
	High	NLDIERPTYTNLNR	1	31	31	unk		0	7.57072e+07	3.2845	3	1718.89	3.92509	31.8575	0
unk	len=1550 - [Mii72538_c2_g2_i4_1]	3.2845	2.71	1	0	1	1	7.57072e+07	516	57.7604	5.33838
	A2	Sequence	# PSMs	# Proteins	# Protein Groups	Protein Group Accessions	Modifications	ΔCn	Area	XCorr	Charge	MH+ [Da]	ΔM [ppm]	RT [min]	# Missed Cleavages
	High	NLDIERPTYTNLNR	1	31	31	unk		0	7.57072e+07	3.2845	3	1718.89	3.92509	31.8575	0
unk	len=1271 - [Mii72538_c2_g3_i1_1]	3.2845	3.3	1	0	1	1	7.57072e+07	424	47.2576	6.16357
	A2	Sequence	# PSMs	# Proteins	# Protein Groups	Protein Group Accessions	Modifications	ΔCn	Area	XCorr	Charge	MH+ [Da]	ΔM [ppm]	RT [min]	# Missed Cleavages
	High	NLDIERPTYTNLNR	1	31	31	unk		0	7.57072e+07	3.2845	3	1718.89	3.92509	31.8575	0
unk	len=2631 - [Mii78135_c0_g1_i3_3]	3.21738	4.68	1	1	1	1	323672856	876	97.7382	5.08447
	A2	Sequence	# PSMs	# Proteins	# Protein Groups	Protein Group Accessions	Modifications	ΔCn	Area	XCorr	Charge	MH+ [Da]	ΔM [ppm]	RT [min]	# Missed Cleavages
	High	NERPSxTSGFNHQEVVVDRLSNDDIcYNAcIExRYmIYIDR	1	1	1	unk	X6(L); C26(Carbamidomethyl); C30(Carbamidomethyl); X33(L); M36(Oxidation)	0	323672856	3.21738	4	4991.36	1.19448	43.0153	2
unk	len=763 - [Mii64875_c0_g2_i1_5]	3.02702	7.87	1	0	1	1	1.52014e+09	254	29.6472	8.26514
	A2	Sequence	# PSMs	# Proteins	# Protein Groups	Protein Group Accessions	Modifications	ΔCn	Area	XCorr	Charge	MH+ [Da]	ΔM [ppm]	RT [min]	# Missed Cleavages
	High	SLNcIAMmLFKTIHSRCMHR	1	2	2	unk	C4(Carbamidomethyl); M8(Oxidation)	0	1.52014e+09	3.02702	4	2465.19	1.31559	36.8874	2
unk	len=774 - [Mii64875_c0_g2_i2_5]	3.02702	7.78	1	0	1	1	1.52014e+09	257	30.1336	9.48096
	A2	Sequence	# PSMs	# Proteins	# Protein Groups	Protein Group Accessions	Modifications	ΔCn	Area	XCorr	Charge	MH+ [Da]	ΔM [ppm]	RT [min]	# Missed Cleavages
	High	SLNcIAMmLFKTIHSRCMHR	1	2	2	unk	C4(Carbamidomethyl); M8(Oxidation)	0	1.52014e+09	3.02702	4	2465.19	1.31559	36.8874	2
unk	len=1134 - [Mii27853_c0_g1_i1_6]	2.68685	3.45	1	0	1	1	2.54209e+07	377	42.6093	8.42627
	A2	Sequence	# PSMs	# Proteins	# Protein Groups	Protein Group Accessions	Modifications	ΔCn	Area	XCorr	Charge	MH+ [Da]	ΔM [ppm]	RT [min]	# Missed Cleavages
	High	TAENFRALcTGEK	1	2	2	unk	C9(Carbamidomethyl)	0	2.54209e+07	2.68685	3	1496.72	1.1461	26.8928	1
unk	len=690 - [Mii29770_c0_g1_i1_1]	2.68685	5.65	1	0	1	1	2.54209e+07	230	25.3594	8.1626
	A2	Sequence	# PSMs	# Proteins	# Protein Groups	Protein Group Accessions	Modifications	ΔCn	Area	XCorr	Charge	MH+ [Da]	ΔM [ppm]	RT [min]	# Missed Cleavages
	High	TAENFRALcTGEK	1	2	2	unk	C9(Carbamidomethyl)	0	2.54209e+07	2.68685	3	1496.72	1.1461	26.8928	1
unk	len=4125 - [Mii70735_c0_g1_i1_4]	2.55752	1.24	1	0	1	1	4.9678e+07	1375	151.59	5.08447
	A2	Sequence	# PSMs	# Proteins	# Protein Groups	Protein Group Accessions	Modifications	ΔCn	Area	XCorr	Charge	MH+ [Da]	ΔM [ppm]	RT [min]	# Missed Cleavages
	High	LSQDPSQQLTASSHScR	1	3	3	unk	C16(Carbamidomethyl)	0	4.9678e+07	2.55752	3	1901.88	1.17321	24.2314	0
unk	len=4074 - [Mii73053_c0_g1_i1_3]	2.55752	1.25	1	0	1	1	4.9678e+07	1357	149.329	5.0083
	A2	Sequence	# PSMs	# Proteins	# Protein Groups	Protein Group Accessions	Modifications	ΔCn	Area	XCorr	Charge	MH+ [Da]	ΔM [ppm]	RT [min]	# Missed Cleavages
	High	LSQDPSQQLTASSHScR	1	3	3	unk	C16(Carbamidomethyl)	0	4.9678e+07	2.55752	3	1901.88	1.17321	24.2314	0
unk	len=1315 - [Mii73053_c0_g1_i3_1]	2.55752	3.88	1	0	1	1	4.9678e+07	438	48.2609	5.13525
	A2	Sequence	# PSMs	# Proteins	# Protein Groups	Protein Group Accessions	Modifications	ΔCn	Area	XCorr	Charge	MH+ [Da]	ΔM [ppm]	RT [min]	# Missed Cleavages
	High	LSQDPSQQLTASSHScR	1	3	3	unk	C16(Carbamidomethyl)	0	4.9678e+07	2.55752	3	1901.88	1.17321	24.2314	0
unk	len=581 - [Mii23973_c0_g1_i1_4]	2.55431	5.7	1	0	1	1	2.17103e+08	193	21.1593	5.36377
	A2	Sequence	# PSMs	# Proteins	# Protein Groups	Protein Group Accessions	Modifications	ΔCn	Area	XCorr	Charge	MH+ [Da]	ΔM [ppm]	RT [min]	# Missed Cleavages
	High	AVFPSIVGRPR	1	19	19	unk		0	2.17103e+08	2.55431	3	1198.71	0.482666	32.9138	0
unk	len=655 - [Mii24311_c0_g1_i1_5]	2.55431	5.05	1	0	1	1	2.17103e+08	218	24.3992	5.43994
	A2	Sequence	# PSMs	# Proteins	# Protein Groups	Protein Group Accessions	Modifications	ΔCn	Area	XCorr	Charge	MH+ [Da]	ΔM [ppm]	RT [min]	# Missed Cleavages
	High	AVFPSIVGRPR	1	19	19	unk		0	2.17103e+08	2.55431	3	1198.71	0.482666	32.9138	0
unk	len=227 - [Mii27308_c0_g1_i1_4]	2.55431	14.67	1	0	1	1	2.17103e+08	75	8.38012	7.51807
	A2	Sequence	# PSMs	# Proteins	# Protein Groups	Protein Group Accessions	Modifications	ΔCn	Area	XCorr	Charge	MH+ [Da]	ΔM [ppm]	RT [min]	# Missed Cleavages
	High	AVFPSIVGRPR	1	19	19	unk		0	2.17103e+08	2.55431	3	1198.71	0.482666	32.9138	0
unk	len=335 - [Mii27308_c0_g2_i1_4]	2.55431	9.91	1	0	1	1	2.17103e+08	111	11.9909	6.52197
	A2	Sequence	# PSMs	# Proteins	# Protein Groups	Protein Group Accessions	Modifications	ΔCn	Area	XCorr	Charge	MH+ [Da]	ΔM [ppm]	RT [min]	# Missed Cleavages
	High	AVFPSIVGRPR	1	19	19	unk		0	2.17103e+08	2.55431	3	1198.71	0.482666	32.9138	0
unk	len=348 - [Mii46547_c0_g1_i1_3]	2.55431	9.57	1	0	1	1	2.17103e+08	115	12.483	6.52197
	A2	Sequence	# PSMs	# Proteins	# Protein Groups	Protein Group Accessions	Modifications	ΔCn	Area	XCorr	Charge	MH+ [Da]	ΔM [ppm]	RT [min]	# Missed Cleavages
	High	AVFPSIVGRPR	1	19	19	unk		0	2.17103e+08	2.55431	3	1198.71	0.482666	32.9138	0
unk	len=341 - [Mii46547_c0_g1_i2_3]	2.55431	9.73	1	0	1	1	2.17103e+08	113	12.314	8.03076
	A2	Sequence	# PSMs	# Proteins	# Protein Groups	Protein Group Accessions	Modifications	ΔCn	Area	XCorr	Charge	MH+ [Da]	ΔM [ppm]	RT [min]	# Missed Cleavages
	High	AVFPSIVGRPR	1	19	19	unk		0	2.17103e+08	2.55431	3	1198.71	0.482666	32.9138	0
unk	len=384 - [Mii50925_c0_g1_i1_2]	2.55431	8.66	1	0	1	1	2.17103e+08	127	14.126	6.16357
	A2	Sequence	# PSMs	# Proteins	# Protein Groups	Protein Group Accessions	Modifications	ΔCn	Area	XCorr	Charge	MH+ [Da]	ΔM [ppm]	RT [min]	# Missed Cleavages
	High	AVFPSIVGRPR	1	19	19	unk		0	2.17103e+08	2.55431	3	1198.71	0.482666	32.9138	0
unk	len=396 - [Mii50925_c0_g1_i2_2]	2.55431	8.4	1	0	1	1	2.17103e+08	131	14.5723	6.16357
	A2	Sequence	# PSMs	# Proteins	# Protein Groups	Protein Group Accessions	Modifications	ΔCn	Area	XCorr	Charge	MH+ [Da]	ΔM [ppm]	RT [min]	# Missed Cleavages
	High	AVFPSIVGRPR	1	19	19	unk		0	2.17103e+08	2.55431	3	1198.71	0.482666	32.9138	0
unk	len=541 - [Mii58597_c0_g1_i1_1]	2.55431	6.11	1	0	1	1	2.17103e+08	180	19.8697	5.5415
	A2	Sequence	# PSMs	# Proteins	# Protein Groups	Protein Group Accessions	Modifications	ΔCn	Area	XCorr	Charge	MH+ [Da]	ΔM [ppm]	RT [min]	# Missed Cleavages
	High	AVFPSIVGRPR	1	19	19	unk		0	2.17103e+08	2.55431	3	1198.71	0.482666	32.9138	0
unk	len=439 - [Mii64514_c0_g1_i2_1]	2.55431	7.53	1	0	1	1	2.17103e+08	146	16.3921	6.68311
	A2	Sequence	# PSMs	# Proteins	# Protein Groups	Protein Group Accessions	Modifications	ΔCn	Area	XCorr	Charge	MH+ [Da]	ΔM [ppm]	RT [min]	# Missed Cleavages
	High	AVFPSIVGRPR	1	19	19	unk		0	2.17103e+08	2.55431	3	1198.71	0.482666	32.9138	0
unk	len=235 - [Mii68875_c0_g1_i1_6]	2.55431	14.1	1	0	1	1	2.17103e+08	78	9.05261	7.04932
	A2	Sequence	# PSMs	# Proteins	# Protein Groups	Protein Group Accessions	Modifications	ΔCn	Area	XCorr	Charge	MH+ [Da]	ΔM [ppm]	RT [min]	# Missed Cleavages
	High	AVFPSIVGRPR	1	19	19	unk		0	2.17103e+08	2.55431	3	1198.71	0.482666	32.9138	0
unk	len=406 - [Mii102888_c0_g1_i1_4]	2.55431	8.15	1	0	1	1	2.17103e+08	135	14.7434	5.98584
	A2	Sequence	# PSMs	# Proteins	# Protein Groups	Protein Group Accessions	Modifications	ΔCn	Area	XCorr	Charge	MH+ [Da]	ΔM [ppm]	RT [min]	# Missed Cleavages
	High	AVFPSIVGRPR	1	19	19	unk		0	2.17103e+08	2.55431	3	1198.71	0.482666	32.9138	0
unk	len=403 - [Mii103221_c0_g1_i1_5]	2.55431	8.21	1	0	1	1	2.17103e+08	134	14.8322	7.37158
	A2	Sequence	# PSMs	# Proteins	# Protein Groups	Protein Group Accessions	Modifications	ΔCn	Area	XCorr	Charge	MH+ [Da]	ΔM [ppm]	RT [min]	# Missed Cleavages
	High	AVFPSIVGRPR	1	19	19	unk		0	2.17103e+08	2.55431	3	1198.71	0.482666	32.9138	0
unk	len=967 - [Mii3789_c0_g1_i1_6]	2.5351	4.98	1	0	1	1	50294121	321	37.0783	7.81104
	A2	Sequence	# PSMs	# Proteins	# Protein Groups	Protein Group Accessions	Modifications	ΔCn	Area	XCorr	Charge	MH+ [Da]	ΔM [ppm]	RT [min]	# Missed Cleavages
	High	SYELPDGQVITIGNER	1	31	31	unk		0	50294121	2.5351	2	1790.9	3.76232	40.104	0
unk	len=617 - [Mii3798_c0_g3_i1_2]	2.5351	7.8	1	0	1	1	50294121	205	23.2934	5.41455
	A2	Sequence	# PSMs	# Proteins	# Protein Groups	Protein Group Accessions	Modifications	ΔCn	Area	XCorr	Charge	MH+ [Da]	ΔM [ppm]	RT [min]	# Missed Cleavages
	High	SYELPDGQVITIGNER	1	31	31	unk		0	50294121	2.5351	2	1790.9	3.76232	40.104	0
unk	len=312 - [Mii47890_c0_g1_i1_6]	2.5351	15.38	1	0	1	1	50294121	104	11.3987	5.41455
	A2	Sequence	# PSMs	# Proteins	# Protein Groups	Protein Group Accessions	Modifications	ΔCn	Area	XCorr	Charge	MH+ [Da]	ΔM [ppm]	RT [min]	# Missed Cleavages
	High	SYELPDGQVITIGNER	1	31	31	unk		0	50294121	2.5351	2	1790.9	3.76232	40.104	0
unk	len=234 - [Mii47890_c0_g3_i1_6]	2.5351	20.51	1	0	1	1	50294121	78	8.57805	4.65283
	A2	Sequence	# PSMs	# Proteins	# Protein Groups	Protein Group Accessions	Modifications	ΔCn	Area	XCorr	Charge	MH+ [Da]	ΔM [ppm]	RT [min]	# Missed Cleavages
	High	SYELPDGQVITIGNER	1	31	31	unk		0	50294121	2.5351	2	1790.9	3.76232	40.104	0
unk	len=801 - [Mii51784_c0_g1_i1_3]	2.5351	6.02	1	0	1	1	50294121	266	29.859	5.26221
	A2	Sequence	# PSMs	# Proteins	# Protein Groups	Protein Group Accessions	Modifications	ΔCn	Area	XCorr	Charge	MH+ [Da]	ΔM [ppm]	RT [min]	# Missed Cleavages
	High	SYELPDGQVITIGNER	1	31	31	unk		0	50294121	2.5351	2	1790.9	3.76232	40.104	0
unk	len=639 - [Mii51784_c0_g2_i1_3]	2.5351	7.55	1	0	1	1	50294121	212	23.4817	5.43994
	A2	Sequence	# PSMs	# Proteins	# Protein Groups	Protein Group Accessions	Modifications	ΔCn	Area	XCorr	Charge	MH+ [Da]	ΔM [ppm]	RT [min]	# Missed Cleavages
	High	SYELPDGQVITIGNER	1	31	31	unk		0	50294121	2.5351	2	1790.9	3.76232	40.104	0
unk	len=585 - [Mii64514_c0_g1_i3_3]	2.5351	8.25	1	0	1	1	50294121	194	21.8208	5.14795
	A2	Sequence	# PSMs	# Proteins	# Protein Groups	Protein Group Accessions	Modifications	ΔCn	Area	XCorr	Charge	MH+ [Da]	ΔM [ppm]	RT [min]	# Missed Cleavages
	High	SYELPDGQVITIGNER	1	31	31	unk		0	50294121	2.5351	2	1790.9	3.76232	40.104	0
unk	len=585 - [Mii77974_c0_g1_i1_4]	2.5351	8.21	1	0	1	1	50294121	195	21.7689	5.41455
	A2	Sequence	# PSMs	# Proteins	# Protein Groups	Protein Group Accessions	Modifications	ΔCn	Area	XCorr	Charge	MH+ [Da]	ΔM [ppm]	RT [min]	# Missed Cleavages
	High	SYELPDGQVITIGNER	1	31	31	unk		0	50294121	2.5351	2	1790.9	3.76232	40.104	0
unk	len=828 - [Mii77974_c0_g1_i2_4]	2.5351	5.84	1	0	1	1	50294121	274	30.5193	5.65576
	A2	Sequence	# PSMs	# Proteins	# Protein Groups	Protein Group Accessions	Modifications	ΔCn	Area	XCorr	Charge	MH+ [Da]	ΔM [ppm]	RT [min]	# Missed Cleavages
	High	SYELPDGQVITIGNER	1	31	31	unk		0	50294121	2.5351	2	1790.9	3.76232	40.104	0
unk	len=264 - [Mii77974_c0_g1_i3_6]	2.5351	18.39	1	0	1	1	50294121	87	9.51662	4.61475
	A2	Sequence	# PSMs	# Proteins	# Protein Groups	Protein Group Accessions	Modifications	ΔCn	Area	XCorr	Charge	MH+ [Da]	ΔM [ppm]	RT [min]	# Missed Cleavages
	High	SYELPDGQVITIGNER	1	31	31	unk		0	50294121	2.5351	2	1790.9	3.76232	40.104	0
unk	len=735 - [Mii77974_c0_g1_i4_4]	2.5351	6.58	1	0	1	1	50294121	243	27.3459	5.88428
	A2	Sequence	# PSMs	# Proteins	# Protein Groups	Protein Group Accessions	Modifications	ΔCn	Area	XCorr	Charge	MH+ [Da]	ΔM [ppm]	RT [min]	# Missed Cleavages
	High	SYELPDGQVITIGNER	1	31	31	unk		0	50294121	2.5351	2	1790.9	3.76232	40.104	0
unk	len=786 - [Mii77974_c0_g1_i5_4]	2.5351	6.11	1	0	1	1	50294121	262	29.0576	5.35107
	A2	Sequence	# PSMs	# Proteins	# Protein Groups	Protein Group Accessions	Modifications	ΔCn	Area	XCorr	Charge	MH+ [Da]	ΔM [ppm]	RT [min]	# Missed Cleavages
	High	SYELPDGQVITIGNER	1	31	31	unk		0	50294121	2.5351	2	1790.9	3.76232	40.104	0
unk	len=780 - [Mii77974_c0_g1_i8_4]	2.5351	6.2	1	0	1	1	50294121	258	28.7624	5.49072
	A2	Sequence	# PSMs	# Proteins	# Protein Groups	Protein Group Accessions	Modifications	ΔCn	Area	XCorr	Charge	MH+ [Da]	ΔM [ppm]	RT [min]	# Missed Cleavages
	High	SYELPDGQVITIGNER	1	31	31	unk		0	50294121	2.5351	2	1790.9	3.76232	40.104	0
unk	len=681 - [Mii77974_c0_g1_i10_4]	2.5351	7.05	1	0	1	1	50294121	227	25.4379	5.46533
	A2	Sequence	# PSMs	# Proteins	# Protein Groups	Protein Group Accessions	Modifications	ΔCn	Area	XCorr	Charge	MH+ [Da]	ΔM [ppm]	RT [min]	# Missed Cleavages
	High	SYELPDGQVITIGNER	1	31	31	unk		0	50294121	2.5351	2	1790.9	3.76232	40.104	0
unk	len=639 - [Mii77974_c0_g1_i11_4]	2.5351	7.58	1	0	1	1	50294121	211	23.6789	5.89697
	A2	Sequence	# PSMs	# Proteins	# Protein Groups	Protein Group Accessions	Modifications	ΔCn	Area	XCorr	Charge	MH+ [Da]	ΔM [ppm]	RT [min]	# Missed Cleavages
	High	SYELPDGQVITIGNER	1	31	31	unk		0	50294121	2.5351	2	1790.9	3.76232	40.104	0
unk	len=615 - [Mii77974_c0_g1_i12_4]	2.5351	7.8	1	0	1	1	50294121	205	23.0895	5.30029
	A2	Sequence	# PSMs	# Proteins	# Protein Groups	Protein Group Accessions	Modifications	ΔCn	Area	XCorr	Charge	MH+ [Da]	ΔM [ppm]	RT [min]	# Missed Cleavages
	High	SYELPDGQVITIGNER	1	31	31	unk		0	50294121	2.5351	2	1790.9	3.76232	40.104	0
unk	len=971 - [Mii77974_c0_g1_i13_4]	2.5351	4.95	1	0	1	1	50294121	323	36.321	5.23682
	A2	Sequence	# PSMs	# Proteins	# Protein Groups	Protein Group Accessions	Modifications	ΔCn	Area	XCorr	Charge	MH+ [Da]	ΔM [ppm]	RT [min]	# Missed Cleavages
	High	SYELPDGQVITIGNER	1	31	31	unk		0	50294121	2.5351	2	1790.9	3.76232	40.104	0
unk	len=615 - [Mii77974_c0_g1_i14_4]	2.5351	7.8	1	0	1	1	50294121	205	23.1215	5.30029
	A2	Sequence	# PSMs	# Proteins	# Protein Groups	Protein Group Accessions	Modifications	ΔCn	Area	XCorr	Charge	MH+ [Da]	ΔM [ppm]	RT [min]	# Missed Cleavages
	High	SYELPDGQVITIGNER	1	31	31	unk		0	50294121	2.5351	2	1790.9	3.76232	40.104	0
unk	len=1025 - [Mii77974_c0_g1_i15_4]	2.5351	4.72	1	0	1	1	50294121	339	38.229	5.43994
	A2	Sequence	# PSMs	# Proteins	# Protein Groups	Protein Group Accessions	Modifications	ΔCn	Area	XCorr	Charge	MH+ [Da]	ΔM [ppm]	RT [min]	# Missed Cleavages
	High	SYELPDGQVITIGNER	1	31	31	unk		0	50294121	2.5351	2	1790.9	3.76232	40.104	0
unk	len=639 - [Mii77974_c0_g1_i16_4]	2.5351	7.58	1	0	1	1	50294121	211	23.6949	5.89697
	A2	Sequence	# PSMs	# Proteins	# Protein Groups	Protein Group Accessions	Modifications	ΔCn	Area	XCorr	Charge	MH+ [Da]	ΔM [ppm]	RT [min]	# Missed Cleavages
	High	SYELPDGQVITIGNER	1	31	31	unk		0	50294121	2.5351	2	1790.9	3.76232	40.104	0
unk	len=345 - [Mii77974_c0_g1_i19_4]	2.5351	13.91	1	0	1	1	50294121	115	12.7322	4.90674
	A2	Sequence	# PSMs	# Proteins	# Protein Groups	Protein Group Accessions	Modifications	ΔCn	Area	XCorr	Charge	MH+ [Da]	ΔM [ppm]	RT [min]	# Missed Cleavages
	High	SYELPDGQVITIGNER	1	31	31	unk		0	50294121	2.5351	2	1790.9	3.76232	40.104	0
unk	len=634 - [Mii77974_c0_g1_i20_5]	2.5351	7.58	1	0	1	1	50294121	211	23.4208	5.17334
	A2	Sequence	# PSMs	# Proteins	# Protein Groups	Protein Group Accessions	Modifications	ΔCn	Area	XCorr	Charge	MH+ [Da]	ΔM [ppm]	RT [min]	# Missed Cleavages
	High	SYELPDGQVITIGNER	1	31	31	unk		0	50294121	2.5351	2	1790.9	3.76232	40.104	0
unk	len=615 - [Mii77974_c0_g1_i21_4]	2.5351	7.8	1	0	1	1	50294121	205	23.1355	5.30029
	A2	Sequence	# PSMs	# Proteins	# Protein Groups	Protein Group Accessions	Modifications	ΔCn	Area	XCorr	Charge	MH+ [Da]	ΔM [ppm]	RT [min]	# Missed Cleavages
	High	SYELPDGQVITIGNER	1	31	31	unk		0	50294121	2.5351	2	1790.9	3.76232	40.104	0
unk	len=293 - [Mii77974_c0_g5_i1_6]	2.5351	16.33	1	0	1	1	50294121	98	10.5972	5.08447
	A2	Sequence	# PSMs	# Proteins	# Protein Groups	Protein Group Accessions	Modifications	ΔCn	Area	XCorr	Charge	MH+ [Da]	ΔM [ppm]	RT [min]	# Missed Cleavages
	High	SYELPDGQVITIGNER	1	31	31	unk		0	50294121	2.5351	2	1790.9	3.76232	40.104	0
unk	len=726 - [Mii77974_c0_g1_i22_4]	2.5351	6.61	1	0	1	1	50294121	242	26.8704	5.22412
	A2	Sequence	# PSMs	# Proteins	# Protein Groups	Protein Group Accessions	Modifications	ΔCn	Area	XCorr	Charge	MH+ [Da]	ΔM [ppm]	RT [min]	# Missed Cleavages
	High	SYELPDGQVITIGNER	1	31	31	unk		0	50294121	2.5351	2	1790.9	3.76232	40.104	0
unk	len=2379 - [Mii71524_c0_g1_i1_1]	2.46596	1.39	1	1	1	1	1.4307e+08	793	89.5334	9.70068
	A2	Sequence	# PSMs	# Proteins	# Protein Groups	Protein Group Accessions	Modifications	ΔCn	Area	XCorr	Charge	MH+ [Da]	ΔM [ppm]	RT [min]	# Missed Cleavages
	High	NKSIEIDTNIR	1	1	1	unk		0	1.4307e+08	2.46596	2	1302.71	2.96646	27.5362	1
unk	len=722 - [Mii59191_c0_g1_i1_4]	2.39363	5.42	1	0	1	1	38836266	240	27.4797	8.35303
	A2	Sequence	# PSMs	# Proteins	# Protein Groups	Protein Group Accessions	Modifications	ΔCn	Area	XCorr	Charge	MH+ [Da]	ΔM [ppm]	RT [min]	# Missed Cleavages
	High	DNVDISFPNNPER	1	4	4	unk		0	38836266	2.39363	2	1516.71	6.24674	33.7148	0
unk	len=804 - [Mii59191_c0_g2_i1_4]	2.39363	4.85	1	0	1	1	38836266	268	31.3165	8.67529
	A2	Sequence	# PSMs	# Proteins	# Protein Groups	Protein Group Accessions	Modifications	ΔCn	Area	XCorr	Charge	MH+ [Da]	ΔM [ppm]	RT [min]	# Missed Cleavages
	High	DNVDISFPNNPER	1	4	4	unk		0	38836266	2.39363	2	1516.71	6.24674	33.7148	0

## Sheet: footprints of tail amp animals2
Accession	Description	Score	Coverage	# Proteins	# Unique Peptides	# Peptides	# PSMs	Area	# AAs	MW [kDa]	calc. pI
unk	len=309 - [Mii66946_c0_g2_i1_5]	16.7291	19.61	1	0	3	5	1.01076e+08	102	10.7264	4.61475
	A2	Sequence	# PSMs	# Proteins	# Protein Groups	Protein Group Accessions	Modifications	ΔCn	Area	XCorr	Charge	MH+ [Da]	ΔM [ppm]	RT [min]	# Missed Cleavages
	High	TDLIPKDNVDISFPNNPERK	2	2	2	unk		0	1.49925e+08	3.62325	4	2312.19	1.86589	35.8552	2
	High	TDLIPKDNVDISFPNNPER	2	2	2	unk		0	116457749	3.39735	3	2184.1	1.3943	37.877	1
	High	DNVDISFPNNPER	1	4	4	unk		0	3.68445e+07	2.98262	2	1516.71	3.42982	33.9235	0
unk	len=229 - [Mii66946_c0_g2_i2_5]	16.7291	26.32	1	0	3	5	1.01076e+08	76	8.40621	4.61475
	A2	Sequence	# PSMs	# Proteins	# Protein Groups	Protein Group Accessions	Modifications	ΔCn	Area	XCorr	Charge	MH+ [Da]	ΔM [ppm]	RT [min]	# Missed Cleavages
	High	TDLIPKDNVDISFPNNPERK	2	2	2	unk		0	1.49925e+08	3.62325	4	2312.19	1.86589	35.8552	2
	High	TDLIPKDNVDISFPNNPER	2	2	2	unk		0	116457749	3.39735	3	2184.1	1.3943	37.877	1
	High	DNVDISFPNNPER	1	4	4	unk		0	3.68445e+07	2.98262	2	1516.71	3.42982	33.9235	0
unk	len=1034 - [Mii61805_c3_g1_i1_5]	15.3305	17.44	1	0	4	5	5.95262e+07	344	37.1517	7.41553
	A2	Sequence	# PSMs	# Proteins	# Protein Groups	Protein Group Accessions	Modifications	ΔCn	Area	XCorr	Charge	MH+ [Da]	ΔM [ppm]	RT [min]	# Missed Cleavages
	High	TcQDGSSTAHQVIK	1	34	34	unk	C2(Carbamidomethyl)	0	3.75188e+07	3.42464	3	1531.72	0.516918	19.6865	0
	High	VYRDIVNAVSTK	2	34	34	unk		0	8.18907e+07	3.28806	3	1364.75	-0.508276	29.3593	1
	High	AGYAAGVAcDSGTNNAEcK	1	34	34	unk	C9(Carbamidomethyl); C18(Carbamidomethyl)	0	2.36936e+07	3.11266	2	1915.79	2.01384	23.9223	0
	High	cTIEPAYTSGDAFTK	1	34	34	unk	C1(Carbamidomethyl)	0	5.9169e+07	2.33041	2	1660.75	0.876998	32.6159	0
unk	len=1021 - [Mii61805_c3_g2_i1_4]	15.3305	17.65	1	0	4	5	5.95262e+07	340	36.5984	6.72705
	A2	Sequence	# PSMs	# Proteins	# Protein Groups	Protein Group Accessions	Modifications	ΔCn	Area	XCorr	Charge	MH+ [Da]	ΔM [ppm]	RT [min]	# Missed Cleavages
	High	TcQDGSSTAHQVIK	1	34	34	unk	C2(Carbamidomethyl)	0	3.75188e+07	3.42464	3	1531.72	0.516918	19.6865	0
	High	VYRDIVNAVSTK	2	34	34	unk		0	8.18907e+07	3.28806	3	1364.75	-0.508276	29.3593	1
	High	AGYAAGVAcDSGTNNAEcK	1	34	34	unk	C9(Carbamidomethyl); C18(Carbamidomethyl)	0	2.36936e+07	3.11266	2	1915.79	2.01384	23.9223	0
	High	cTIEPAYTSGDAFTK	1	34	34	unk	C1(Carbamidomethyl)	0	5.9169e+07	2.33041	2	1660.75	0.876998	32.6159	0
unk	len=1001 - [Mii61805_c3_g3_i1_5]	15.3305	18.02	1	0	4	5	5.95262e+07	333	35.752	6.96143
	A2	Sequence	# PSMs	# Proteins	# Protein Groups	Protein Group Accessions	Modifications	ΔCn	Area	XCorr	Charge	MH+ [Da]	ΔM [ppm]	RT [min]	# Missed Cleavages
	High	TcQDGSSTAHQVIK	1	34	34	unk	C2(Carbamidomethyl)	0	3.75188e+07	3.42464	3	1531.72	0.516918	19.6865	0
	High	VYRDIVNAVSTK	2	34	34	unk		0	8.18907e+07	3.28806	3	1364.75	-0.508276	29.3593	1
	High	AGYAAGVAcDSGTNNAEcK	1	34	34	unk	C9(Carbamidomethyl); C18(Carbamidomethyl)	0	2.36936e+07	3.11266	2	1915.79	2.01384	23.9223	0
	High	cTIEPAYTSGDAFTK	1	34	34	unk	C1(Carbamidomethyl)	0	5.9169e+07	2.33041	2	1660.75	0.876998	32.6159	0
unk	len=1021 - [Mii61805_c3_g4_i1_4]	15.3305	17.65	1	0	4	5	5.95262e+07	340	36.6985	6.96143
	A2	Sequence	# PSMs	# Proteins	# Protein Groups	Protein Group Accessions	Modifications	ΔCn	Area	XCorr	Charge	MH+ [Da]	ΔM [ppm]	RT [min]	# Missed Cleavages
	High	TcQDGSSTAHQVIK	1	34	34	unk	C2(Carbamidomethyl)	0	3.75188e+07	3.42464	3	1531.72	0.516918	19.6865	0
	High	VYRDIVNAVSTK	2	34	34	unk		0	8.18907e+07	3.28806	3	1364.75	-0.508276	29.3593	1
	High	AGYAAGVAcDSGTNNAEcK	1	34	34	unk	C9(Carbamidomethyl); C18(Carbamidomethyl)	0	2.36936e+07	3.11266	2	1915.79	2.01384	23.9223	0
	High	cTIEPAYTSGDAFTK	1	34	34	unk	C1(Carbamidomethyl)	0	5.9169e+07	2.33041	2	1660.75	0.876998	32.6159	0
unk	len=1024 - [Mii61805_c3_g5_i1_4]	15.3305	17.6	1	0	4	5	5.95262e+07	341	36.8096	7.1958
	A2	Sequence	# PSMs	# Proteins	# Protein Groups	Protein Group Accessions	Modifications	ΔCn	Area	XCorr	Charge	MH+ [Da]	ΔM [ppm]	RT [min]	# Missed Cleavages
	High	TcQDGSSTAHQVIK	1	34	34	unk	C2(Carbamidomethyl)	0	3.75188e+07	3.42464	3	1531.72	0.516918	19.6865	0
	High	VYRDIVNAVSTK	2	34	34	unk		0	8.18907e+07	3.28806	3	1364.75	-0.508276	29.3593	1
	High	AGYAAGVAcDSGTNNAEcK	1	34	34	unk	C9(Carbamidomethyl); C18(Carbamidomethyl)	0	2.36936e+07	3.11266	2	1915.79	2.01384	23.9223	0
	High	cTIEPAYTSGDAFTK	1	34	34	unk	C1(Carbamidomethyl)	0	5.9169e+07	2.33041	2	1660.75	0.876998	32.6159	0
unk	len=1024 - [Mii61805_c3_g6_i1_4]	15.3305	17.6	1	0	4	5	5.95262e+07	341	36.8676	7.1958
	A2	Sequence	# PSMs	# Proteins	# Protein Groups	Protein Group Accessions	Modifications	ΔCn	Area	XCorr	Charge	MH+ [Da]	ΔM [ppm]	RT [min]	# Missed Cleavages
	High	TcQDGSSTAHQVIK	1	34	34	unk	C2(Carbamidomethyl)	0	3.75188e+07	3.42464	3	1531.72	0.516918	19.6865	0
	High	VYRDIVNAVSTK	2	34	34	unk		0	8.18907e+07	3.28806	3	1364.75	-0.508276	29.3593	1
	High	AGYAAGVAcDSGTNNAEcK	1	34	34	unk	C9(Carbamidomethyl); C18(Carbamidomethyl)	0	2.36936e+07	3.11266	2	1915.79	2.01384	23.9223	0
	High	cTIEPAYTSGDAFTK	1	34	34	unk	C1(Carbamidomethyl)	0	5.9169e+07	2.33041	2	1660.75	0.876998	32.6159	0
unk	len=1024 - [Mii61805_c3_g7_i1_4]	15.3305	17.6	1	0	4	5	5.95262e+07	341	36.7955	7.1958
	A2	Sequence	# PSMs	# Proteins	# Protein Groups	Protein Group Accessions	Modifications	ΔCn	Area	XCorr	Charge	MH+ [Da]	ΔM [ppm]	RT [min]	# Missed Cleavages
	High	TcQDGSSTAHQVIK	1	34	34	unk	C2(Carbamidomethyl)	0	3.75188e+07	3.42464	3	1531.72	0.516918	19.6865	0
	High	VYRDIVNAVSTK	2	34	34	unk		0	8.18907e+07	3.28806	3	1364.75	-0.508276	29.3593	1
	High	AGYAAGVAcDSGTNNAEcK	1	34	34	unk	C9(Carbamidomethyl); C18(Carbamidomethyl)	0	2.36936e+07	3.11266	2	1915.79	2.01384	23.9223	0
	High	cTIEPAYTSGDAFTK	1	34	34	unk	C1(Carbamidomethyl)	0	5.9169e+07	2.33041	2	1660.75	0.876998	32.6159	0
unk	len=1021 - [Mii61805_c3_g8_i1_4]	15.3305	17.65	1	0	4	5	5.95262e+07	340	36.7005	6.96143
	A2	Sequence	# PSMs	# Proteins	# Protein Groups	Protein Group Accessions	Modifications	ΔCn	Area	XCorr	Charge	MH+ [Da]	ΔM [ppm]	RT [min]	# Missed Cleavages
	High	TcQDGSSTAHQVIK	1	34	34	unk	C2(Carbamidomethyl)	0	3.75188e+07	3.42464	3	1531.72	0.516918	19.6865	0
	High	VYRDIVNAVSTK	2	34	34	unk		0	8.18907e+07	3.28806	3	1364.75	-0.508276	29.3593	1
	High	AGYAAGVAcDSGTNNAEcK	1	34	34	unk	C9(Carbamidomethyl); C18(Carbamidomethyl)	0	2.36936e+07	3.11266	2	1915.79	2.01384	23.9223	0
	High	cTIEPAYTSGDAFTK	1	34	34	unk	C1(Carbamidomethyl)	0	5.9169e+07	2.33041	2	1660.75	0.876998	32.6159	0
unk	len=1021 - [Mii61805_c3_g9_i1_4]	15.3305	17.65	1	0	4	5	5.95262e+07	340	36.6014	6.72705
	A2	Sequence	# PSMs	# Proteins	# Protein Groups	Protein Group Accessions	Modifications	ΔCn	Area	XCorr	Charge	MH+ [Da]	ΔM [ppm]	RT [min]	# Missed Cleavages
	High	TcQDGSSTAHQVIK	1	34	34	unk	C2(Carbamidomethyl)	0	3.75188e+07	3.42464	3	1531.72	0.516918	19.6865	0
	High	VYRDIVNAVSTK	2	34	34	unk		0	8.18907e+07	3.28806	3	1364.75	-0.508276	29.3593	1
	High	AGYAAGVAcDSGTNNAEcK	1	34	34	unk	C9(Carbamidomethyl); C18(Carbamidomethyl)	0	2.36936e+07	3.11266	2	1915.79	2.01384	23.9223	0
	High	cTIEPAYTSGDAFTK	1	34	34	unk	C1(Carbamidomethyl)	0	5.9169e+07	2.33041	2	1660.75	0.876998	32.6159	0
unk	len=1024 - [Mii61805_c3_g10_i1_4]	15.3305	17.6	1	0	4	5	5.95262e+07	341	36.7965	6.96143
	A2	Sequence	# PSMs	# Proteins	# Protein Groups	Protein Group Accessions	Modifications	ΔCn	Area	XCorr	Charge	MH+ [Da]	ΔM [ppm]	RT [min]	# Missed Cleavages
	High	TcQDGSSTAHQVIK	1	34	34	unk	C2(Carbamidomethyl)	0	3.75188e+07	3.42464	3	1531.72	0.516918	19.6865	0
	High	VYRDIVNAVSTK	2	34	34	unk		0	8.18907e+07	3.28806	3	1364.75	-0.508276	29.3593	1
	High	AGYAAGVAcDSGTNNAEcK	1	34	34	unk	C9(Carbamidomethyl); C18(Carbamidomethyl)	0	2.36936e+07	3.11266	2	1915.79	2.01384	23.9223	0
	High	cTIEPAYTSGDAFTK	1	34	34	unk	C1(Carbamidomethyl)	0	5.9169e+07	2.33041	2	1660.75	0.876998	32.6159	0
unk	len=1039 - [Mii61805_c3_g11_i1_4]	15.3305	17.34	1	0	4	5	5.95262e+07	346	37.4088	7.1958
	A2	Sequence	# PSMs	# Proteins	# Protein Groups	Protein Group Accessions	Modifications	ΔCn	Area	XCorr	Charge	MH+ [Da]	ΔM [ppm]	RT [min]	# Missed Cleavages
	High	TcQDGSSTAHQVIK	1	34	34	unk	C2(Carbamidomethyl)	0	3.75188e+07	3.42464	3	1531.72	0.516918	19.6865	0
	High	VYRDIVNAVSTK	2	34	34	unk		0	8.18907e+07	3.28806	3	1364.75	-0.508276	29.3593	1
	High	AGYAAGVAcDSGTNNAEcK	1	34	34	unk	C9(Carbamidomethyl); C18(Carbamidomethyl)	0	2.36936e+07	3.11266	2	1915.79	2.01384	23.9223	0
	High	cTIEPAYTSGDAFTK	1	34	34	unk	C1(Carbamidomethyl)	0	5.9169e+07	2.33041	2	1660.75	0.876998	32.6159	0
unk	len=1021 - [Mii61805_c3_g12_i1_4]	15.3305	17.65	1	0	4	5	5.95262e+07	340	36.5974	6.96143
	A2	Sequence	# PSMs	# Proteins	# Protein Groups	Protein Group Accessions	Modifications	ΔCn	Area	XCorr	Charge	MH+ [Da]	ΔM [ppm]	RT [min]	# Missed Cleavages
	High	TcQDGSSTAHQVIK	1	34	34	unk	C2(Carbamidomethyl)	0	3.75188e+07	3.42464	3	1531.72	0.516918	19.6865	0
	High	VYRDIVNAVSTK	2	34	34	unk		0	8.18907e+07	3.28806	3	1364.75	-0.508276	29.3593	1
	High	AGYAAGVAcDSGTNNAEcK	1	34	34	unk	C9(Carbamidomethyl); C18(Carbamidomethyl)	0	2.36936e+07	3.11266	2	1915.79	2.01384	23.9223	0
	High	cTIEPAYTSGDAFTK	1	34	34	unk	C1(Carbamidomethyl)	0	5.9169e+07	2.33041	2	1660.75	0.876998	32.6159	0
unk	len=1015 - [Mii61805_c3_g13_i1_4]	15.3305	17.75	1	0	4	5	5.95262e+07	338	36.4674	6.96143
	A2	Sequence	# PSMs	# Proteins	# Protein Groups	Protein Group Accessions	Modifications	ΔCn	Area	XCorr	Charge	MH+ [Da]	ΔM [ppm]	RT [min]	# Missed Cleavages
	High	TcQDGSSTAHQVIK	1	34	34	unk	C2(Carbamidomethyl)	0	3.75188e+07	3.42464	3	1531.72	0.516918	19.6865	0
	High	VYRDIVNAVSTK	2	34	34	unk		0	8.18907e+07	3.28806	3	1364.75	-0.508276	29.3593	1
	High	AGYAAGVAcDSGTNNAEcK	1	34	34	unk	C9(Carbamidomethyl); C18(Carbamidomethyl)	0	2.36936e+07	3.11266	2	1915.79	2.01384	23.9223	0
	High	cTIEPAYTSGDAFTK	1	34	34	unk	C1(Carbamidomethyl)	0	5.9169e+07	2.33041	2	1660.75	0.876998	32.6159	0
unk	len=1024 - [Mii61805_c3_g14_i1_4]	15.3305	17.6	1	0	4	5	5.95262e+07	341	36.8376	7.1958
	A2	Sequence	# PSMs	# Proteins	# Protein Groups	Protein Group Accessions	Modifications	ΔCn	Area	XCorr	Charge	MH+ [Da]	ΔM [ppm]	RT [min]	# Missed Cleavages
	High	TcQDGSSTAHQVIK	1	34	34	unk	C2(Carbamidomethyl)	0	3.75188e+07	3.42464	3	1531.72	0.516918	19.6865	0
	High	VYRDIVNAVSTK	2	34	34	unk		0	8.18907e+07	3.28806	3	1364.75	-0.508276	29.3593	1
	High	AGYAAGVAcDSGTNNAEcK	1	34	34	unk	C9(Carbamidomethyl); C18(Carbamidomethyl)	0	2.36936e+07	3.11266	2	1915.79	2.01384	23.9223	0
	High	cTIEPAYTSGDAFTK	1	34	34	unk	C1(Carbamidomethyl)	0	5.9169e+07	2.33041	2	1660.75	0.876998	32.6159	0
unk	len=1021 - [Mii61805_c3_g16_i1_4]	15.3305	17.65	1	0	4	5	5.95262e+07	340	36.6294	6.72705
	A2	Sequence	# PSMs	# Proteins	# Protein Groups	Protein Group Accessions	Modifications	ΔCn	Area	XCorr	Charge	MH+ [Da]	ΔM [ppm]	RT [min]	# Missed Cleavages
	High	TcQDGSSTAHQVIK	1	34	34	unk	C2(Carbamidomethyl)	0	3.75188e+07	3.42464	3	1531.72	0.516918	19.6865	0
	High	VYRDIVNAVSTK	2	34	34	unk		0	8.18907e+07	3.28806	3	1364.75	-0.508276	29.3593	1
	High	AGYAAGVAcDSGTNNAEcK	1	34	34	unk	C9(Carbamidomethyl); C18(Carbamidomethyl)	0	2.36936e+07	3.11266	2	1915.79	2.01384	23.9223	0
	High	cTIEPAYTSGDAFTK	1	34	34	unk	C1(Carbamidomethyl)	0	5.9169e+07	2.33041	2	1660.75	0.876998	32.6159	0
unk	len=1021 - [Mii61805_c3_g17_i1_4]	15.3305	17.65	1	0	4	5	5.95262e+07	340	36.7015	6.96143
	A2	Sequence	# PSMs	# Proteins	# Protein Groups	Protein Group Accessions	Modifications	ΔCn	Area	XCorr	Charge	MH+ [Da]	ΔM [ppm]	RT [min]	# Missed Cleavages
	High	TcQDGSSTAHQVIK	1	34	34	unk	C2(Carbamidomethyl)	0	3.75188e+07	3.42464	3	1531.72	0.516918	19.6865	0
	High	VYRDIVNAVSTK	2	34	34	unk		0	8.18907e+07	3.28806	3	1364.75	-0.508276	29.3593	1
	High	AGYAAGVAcDSGTNNAEcK	1	34	34	unk	C9(Carbamidomethyl); C18(Carbamidomethyl)	0	2.36936e+07	3.11266	2	1915.79	2.01384	23.9223	0
	High	cTIEPAYTSGDAFTK	1	34	34	unk	C1(Carbamidomethyl)	0	5.9169e+07	2.33041	2	1660.75	0.876998	32.6159	0
unk	len=1021 - [Mii61805_c3_g19_i1_4]	15.3305	17.65	1	0	4	5	5.95262e+07	340	36.6254	6.96143
	A2	Sequence	# PSMs	# Proteins	# Protein Groups	Protein Group Accessions	Modifications	ΔCn	Area	XCorr	Charge	MH+ [Da]	ΔM [ppm]	RT [min]	# Missed Cleavages
	High	TcQDGSSTAHQVIK	1	34	34	unk	C2(Carbamidomethyl)	0	3.75188e+07	3.42464	3	1531.72	0.516918	19.6865	0
	High	VYRDIVNAVSTK	2	34	34	unk		0	8.18907e+07	3.28806	3	1364.75	-0.508276	29.3593	1
	High	AGYAAGVAcDSGTNNAEcK	1	34	34	unk	C9(Carbamidomethyl); C18(Carbamidomethyl)	0	2.36936e+07	3.11266	2	1915.79	2.01384	23.9223	0
	High	cTIEPAYTSGDAFTK	1	34	34	unk	C1(Carbamidomethyl)	0	5.9169e+07	2.33041	2	1660.75	0.876998	32.6159	0
unk	len=1021 - [Mii61805_c3_g20_i1_4]	15.3305	17.65	1	0	4	5	5.95262e+07	340	36.6714	6.72705
	A2	Sequence	# PSMs	# Proteins	# Protein Groups	Protein Group Accessions	Modifications	ΔCn	Area	XCorr	Charge	MH+ [Da]	ΔM [ppm]	RT [min]	# Missed Cleavages
	High	TcQDGSSTAHQVIK	1	34	34	unk	C2(Carbamidomethyl)	0	3.75188e+07	3.42464	3	1531.72	0.516918	19.6865	0
	High	VYRDIVNAVSTK	2	34	34	unk		0	8.18907e+07	3.28806	3	1364.75	-0.508276	29.3593	1
	High	AGYAAGVAcDSGTNNAEcK	1	34	34	unk	C9(Carbamidomethyl); C18(Carbamidomethyl)	0	2.36936e+07	3.11266	2	1915.79	2.01384	23.9223	0
	High	cTIEPAYTSGDAFTK	1	34	34	unk	C1(Carbamidomethyl)	0	5.9169e+07	2.33041	2	1660.75	0.876998	32.6159	0
unk	len=1024 - [Mii61805_c3_g21_i1_4]	15.3305	17.6	1	0	4	5	5.95262e+07	341	36.8396	7.1958
	A2	Sequence	# PSMs	# Proteins	# Protein Groups	Protein Group Accessions	Modifications	ΔCn	Area	XCorr	Charge	MH+ [Da]	ΔM [ppm]	RT [min]	# Missed Cleavages
	High	TcQDGSSTAHQVIK	1	34	34	unk	C2(Carbamidomethyl)	0	3.75188e+07	3.42464	3	1531.72	0.516918	19.6865	0
	High	VYRDIVNAVSTK	2	34	34	unk		0	8.18907e+07	3.28806	3	1364.75	-0.508276	29.3593	1
	High	AGYAAGVAcDSGTNNAEcK	1	34	34	unk	C9(Carbamidomethyl); C18(Carbamidomethyl)	0	2.36936e+07	3.11266	2	1915.79	2.01384	23.9223	0
	High	cTIEPAYTSGDAFTK	1	34	34	unk	C1(Carbamidomethyl)	0	5.9169e+07	2.33041	2	1660.75	0.876998	32.6159	0
unk	len=1021 - [Mii61805_c3_g22_i1_4]	15.3305	17.65	1	0	4	5	5.95262e+07	340	36.6705	6.96143
	A2	Sequence	# PSMs	# Proteins	# Protein Groups	Protein Group Accessions	Modifications	ΔCn	Area	XCorr	Charge	MH+ [Da]	ΔM [ppm]	RT [min]	# Missed Cleavages
	High	TcQDGSSTAHQVIK	1	34	34	unk	C2(Carbamidomethyl)	0	3.75188e+07	3.42464	3	1531.72	0.516918	19.6865	0
	High	VYRDIVNAVSTK	2	34	34	unk		0	8.18907e+07	3.28806	3	1364.75	-0.508276	29.3593	1
	High	AGYAAGVAcDSGTNNAEcK	1	34	34	unk	C9(Carbamidomethyl); C18(Carbamidomethyl)	0	2.36936e+07	3.11266	2	1915.79	2.01384	23.9223	0
	High	cTIEPAYTSGDAFTK	1	34	34	unk	C1(Carbamidomethyl)	0	5.9169e+07	2.33041	2	1660.75	0.876998	32.6159	0
unk	len=987 - [Mii61805_c3_g23_i1_6]	15.3305	18.29	1	0	4	5	5.95262e+07	328	35.2687	6.96143
	A2	Sequence	# PSMs	# Proteins	# Protein Groups	Protein Group Accessions	Modifications	ΔCn	Area	XCorr	Charge	MH+ [Da]	ΔM [ppm]	RT [min]	# Missed Cleavages
	High	TcQDGSSTAHQVIK	1	34	34	unk	C2(Carbamidomethyl)	0	3.75188e+07	3.42464	3	1531.72	0.516918	19.6865	0
	High	VYRDIVNAVSTK	2	34	34	unk		0	8.18907e+07	3.28806	3	1364.75	-0.508276	29.3593	1
	High	AGYAAGVAcDSGTNNAEcK	1	34	34	unk	C9(Carbamidomethyl); C18(Carbamidomethyl)	0	2.36936e+07	3.11266	2	1915.79	2.01384	23.9223	0
	High	cTIEPAYTSGDAFTK	1	34	34	unk	C1(Carbamidomethyl)	0	5.9169e+07	2.33041	2	1660.75	0.876998	32.6159	0
unk	len=1034 - [Mii61805_c3_g24_i1_5]	15.3305	17.44	1	0	4	5	5.95262e+07	344	37.1527	7.1958
	A2	Sequence	# PSMs	# Proteins	# Protein Groups	Protein Group Accessions	Modifications	ΔCn	Area	XCorr	Charge	MH+ [Da]	ΔM [ppm]	RT [min]	# Missed Cleavages
	High	TcQDGSSTAHQVIK	1	34	34	unk	C2(Carbamidomethyl)	0	3.75188e+07	3.42464	3	1531.72	0.516918	19.6865	0
	High	VYRDIVNAVSTK	2	34	34	unk		0	8.18907e+07	3.28806	3	1364.75	-0.508276	29.3593	1
	High	AGYAAGVAcDSGTNNAEcK	1	34	34	unk	C9(Carbamidomethyl); C18(Carbamidomethyl)	0	2.36936e+07	3.11266	2	1915.79	2.01384	23.9223	0
	High	cTIEPAYTSGDAFTK	1	34	34	unk	C1(Carbamidomethyl)	0	5.9169e+07	2.33041	2	1660.75	0.876998	32.6159	0
unk	len=1021 - [Mii61805_c3_g27_i1_4]	15.3305	17.65	1	0	4	5	5.95262e+07	340	36.6024	6.72705
	A2	Sequence	# PSMs	# Proteins	# Protein Groups	Protein Group Accessions	Modifications	ΔCn	Area	XCorr	Charge	MH+ [Da]	ΔM [ppm]	RT [min]	# Missed Cleavages
	High	TcQDGSSTAHQVIK	1	34	34	unk	C2(Carbamidomethyl)	0	3.75188e+07	3.42464	3	1531.72	0.516918	19.6865	0
	High	VYRDIVNAVSTK	2	34	34	unk		0	8.18907e+07	3.28806	3	1364.75	-0.508276	29.3593	1
	High	AGYAAGVAcDSGTNNAEcK	1	34	34	unk	C9(Carbamidomethyl); C18(Carbamidomethyl)	0	2.36936e+07	3.11266	2	1915.79	2.01384	23.9223	0
	High	cTIEPAYTSGDAFTK	1	34	34	unk	C1(Carbamidomethyl)	0	5.9169e+07	2.33041	2	1660.75	0.876998	32.6159	0
unk	len=1034 - [Mii61805_c3_g29_i1_5]	15.3305	17.44	1	0	4	5	5.95262e+07	344	37.1817	7.41553
	A2	Sequence	# PSMs	# Proteins	# Protein Groups	Protein Group Accessions	Modifications	ΔCn	Area	XCorr	Charge	MH+ [Da]	ΔM [ppm]	RT [min]	# Missed Cleavages
	High	TcQDGSSTAHQVIK	1	34	34	unk	C2(Carbamidomethyl)	0	3.75188e+07	3.42464	3	1531.72	0.516918	19.6865	0
	High	VYRDIVNAVSTK	2	34	34	unk		0	8.18907e+07	3.28806	3	1364.75	-0.508276	29.3593	1
	High	AGYAAGVAcDSGTNNAEcK	1	34	34	unk	C9(Carbamidomethyl); C18(Carbamidomethyl)	0	2.36936e+07	3.11266	2	1915.79	2.01384	23.9223	0
	High	cTIEPAYTSGDAFTK	1	34	34	unk	C1(Carbamidomethyl)	0	5.9169e+07	2.33041	2	1660.75	0.876998	32.6159	0
unk	len=1021 - [Mii61805_c3_g31_i1_4]	15.3305	17.65	1	0	4	5	5.95262e+07	340	36.7285	6.96143
	A2	Sequence	# PSMs	# Proteins	# Protein Groups	Protein Group Accessions	Modifications	ΔCn	Area	XCorr	Charge	MH+ [Da]	ΔM [ppm]	RT [min]	# Missed Cleavages
	High	TcQDGSSTAHQVIK	1	34	34	unk	C2(Carbamidomethyl)	0	3.75188e+07	3.42464	3	1531.72	0.516918	19.6865	0
	High	VYRDIVNAVSTK	2	34	34	unk		0	8.18907e+07	3.28806	3	1364.75	-0.508276	29.3593	1
	High	AGYAAGVAcDSGTNNAEcK	1	34	34	unk	C9(Carbamidomethyl); C18(Carbamidomethyl)	0	2.36936e+07	3.11266	2	1915.79	2.01384	23.9223	0
	High	cTIEPAYTSGDAFTK	1	34	34	unk	C1(Carbamidomethyl)	0	5.9169e+07	2.33041	2	1660.75	0.876998	32.6159	0
unk	len=1034 - [Mii61805_c3_g32_i1_5]	15.3305	17.44	1	0	4	5	5.95262e+07	344	37.2097	7.41553
	A2	Sequence	# PSMs	# Proteins	# Protein Groups	Protein Group Accessions	Modifications	ΔCn	Area	XCorr	Charge	MH+ [Da]	ΔM [ppm]	RT [min]	# Missed Cleavages
	High	TcQDGSSTAHQVIK	1	34	34	unk	C2(Carbamidomethyl)	0	3.75188e+07	3.42464	3	1531.72	0.516918	19.6865	0
	High	VYRDIVNAVSTK	2	34	34	unk		0	8.18907e+07	3.28806	3	1364.75	-0.508276	29.3593	1
	High	AGYAAGVAcDSGTNNAEcK	1	34	34	unk	C9(Carbamidomethyl); C18(Carbamidomethyl)	0	2.36936e+07	3.11266	2	1915.79	2.01384	23.9223	0
	High	cTIEPAYTSGDAFTK	1	34	34	unk	C1(Carbamidomethyl)	0	5.9169e+07	2.33041	2	1660.75	0.876998	32.6159	0
unk	len=1024 - [Mii61805_c3_g33_i1_4]	15.3305	17.6	1	0	4	5	5.95262e+07	341	36.8105	6.96143
	A2	Sequence	# PSMs	# Proteins	# Protein Groups	Protein Group Accessions	Modifications	ΔCn	Area	XCorr	Charge	MH+ [Da]	ΔM [ppm]	RT [min]	# Missed Cleavages
	High	TcQDGSSTAHQVIK	1	34	34	unk	C2(Carbamidomethyl)	0	3.75188e+07	3.42464	3	1531.72	0.516918	19.6865	0
	High	VYRDIVNAVSTK	2	34	34	unk		0	8.18907e+07	3.28806	3	1364.75	-0.508276	29.3593	1
	High	AGYAAGVAcDSGTNNAEcK	1	34	34	unk	C9(Carbamidomethyl); C18(Carbamidomethyl)	0	2.36936e+07	3.11266	2	1915.79	2.01384	23.9223	0
	High	cTIEPAYTSGDAFTK	1	34	34	unk	C1(Carbamidomethyl)	0	5.9169e+07	2.33041	2	1660.75	0.876998	32.6159	0
unk	len=1039 - [Mii61805_c3_g36_i1_4]	15.3305	17.34	1	0	4	5	5.95262e+07	346	37.4388	7.1958
	A2	Sequence	# PSMs	# Proteins	# Protein Groups	Protein Group Accessions	Modifications	ΔCn	Area	XCorr	Charge	MH+ [Da]	ΔM [ppm]	RT [min]	# Missed Cleavages
	High	TcQDGSSTAHQVIK	1	34	34	unk	C2(Carbamidomethyl)	0	3.75188e+07	3.42464	3	1531.72	0.516918	19.6865	0
	High	VYRDIVNAVSTK	2	34	34	unk		0	8.18907e+07	3.28806	3	1364.75	-0.508276	29.3593	1
	High	AGYAAGVAcDSGTNNAEcK	1	34	34	unk	C9(Carbamidomethyl); C18(Carbamidomethyl)	0	2.36936e+07	3.11266	2	1915.79	2.01384	23.9223	0
	High	cTIEPAYTSGDAFTK	1	34	34	unk	C1(Carbamidomethyl)	0	5.9169e+07	2.33041	2	1660.75	0.876998	32.6159	0
unk	len=1039 - [Mii61805_c3_g37_i1_4]	15.3305	17.34	1	0	4	5	5.95262e+07	346	37.4668	7.1958
	A2	Sequence	# PSMs	# Proteins	# Protein Groups	Protein Group Accessions	Modifications	ΔCn	Area	XCorr	Charge	MH+ [Da]	ΔM [ppm]	RT [min]	# Missed Cleavages
	High	TcQDGSSTAHQVIK	1	34	34	unk	C2(Carbamidomethyl)	0	3.75188e+07	3.42464	3	1531.72	0.516918	19.6865	0
	High	VYRDIVNAVSTK	2	34	34	unk		0	8.18907e+07	3.28806	3	1364.75	-0.508276	29.3593	1
	High	AGYAAGVAcDSGTNNAEcK	1	34	34	unk	C9(Carbamidomethyl); C18(Carbamidomethyl)	0	2.36936e+07	3.11266	2	1915.79	2.01384	23.9223	0
	High	cTIEPAYTSGDAFTK	1	34	34	unk	C1(Carbamidomethyl)	0	5.9169e+07	2.33041	2	1660.75	0.876998	32.6159	0
unk	len=1034 - [Mii61805_c3_g38_i1_5]	15.3305	17.44	1	0	4	5	5.95262e+07	344	37.1827	7.41553
	A2	Sequence	# PSMs	# Proteins	# Protein Groups	Protein Group Accessions	Modifications	ΔCn	Area	XCorr	Charge	MH+ [Da]	ΔM [ppm]	RT [min]	# Missed Cleavages
	High	TcQDGSSTAHQVIK	1	34	34	unk	C2(Carbamidomethyl)	0	3.75188e+07	3.42464	3	1531.72	0.516918	19.6865	0
	High	VYRDIVNAVSTK	2	34	34	unk		0	8.18907e+07	3.28806	3	1364.75	-0.508276	29.3593	1
	High	AGYAAGVAcDSGTNNAEcK	1	34	34	unk	C9(Carbamidomethyl); C18(Carbamidomethyl)	0	2.36936e+07	3.11266	2	1915.79	2.01384	23.9223	0
	High	cTIEPAYTSGDAFTK	1	34	34	unk	C1(Carbamidomethyl)	0	5.9169e+07	2.33041	2	1660.75	0.876998	32.6159	0
unk	len=1024 - [Mii61805_c3_g39_i1_4]	15.3305	17.6	1	0	4	5	5.95262e+07	341	36.8406	7.1958
	A2	Sequence	# PSMs	# Proteins	# Protein Groups	Protein Group Accessions	Modifications	ΔCn	Area	XCorr	Charge	MH+ [Da]	ΔM [ppm]	RT [min]	# Missed Cleavages
	High	TcQDGSSTAHQVIK	1	34	34	unk	C2(Carbamidomethyl)	0	3.75188e+07	3.42464	3	1531.72	0.516918	19.6865	0
	High	VYRDIVNAVSTK	2	34	34	unk		0	8.18907e+07	3.28806	3	1364.75	-0.508276	29.3593	1
	High	AGYAAGVAcDSGTNNAEcK	1	34	34	unk	C9(Carbamidomethyl); C18(Carbamidomethyl)	0	2.36936e+07	3.11266	2	1915.79	2.01384	23.9223	0
	High	cTIEPAYTSGDAFTK	1	34	34	unk	C1(Carbamidomethyl)	0	5.9169e+07	2.33041	2	1660.75	0.876998	32.6159	0
unk	len=1024 - [Mii61805_c3_g45_i1_4]	15.3305	17.6	1	0	4	5	5.95262e+07	341	36.8236	7.1958
	A2	Sequence	# PSMs	# Proteins	# Protein Groups	Protein Group Accessions	Modifications	ΔCn	Area	XCorr	Charge	MH+ [Da]	ΔM [ppm]	RT [min]	# Missed Cleavages
	High	TcQDGSSTAHQVIK	1	34	34	unk	C2(Carbamidomethyl)	0	3.75188e+07	3.42464	3	1531.72	0.516918	19.6865	0
	High	VYRDIVNAVSTK	2	34	34	unk		0	8.18907e+07	3.28806	3	1364.75	-0.508276	29.3593	1
	High	AGYAAGVAcDSGTNNAEcK	1	34	34	unk	C9(Carbamidomethyl); C18(Carbamidomethyl)	0	2.36936e+07	3.11266	2	1915.79	2.01384	23.9223	0
	High	cTIEPAYTSGDAFTK	1	34	34	unk	C1(Carbamidomethyl)	0	5.9169e+07	2.33041	2	1660.75	0.876998	32.6159	0
unk	len=1034 - [Mii61805_c3_g46_i1_5]	15.3305	17.44	1	0	4	5	5.95262e+07	344	37.1797	7.41553
	A2	Sequence	# PSMs	# Proteins	# Protein Groups	Protein Group Accessions	Modifications	ΔCn	Area	XCorr	Charge	MH+ [Da]	ΔM [ppm]	RT [min]	# Missed Cleavages
	High	TcQDGSSTAHQVIK	1	34	34	unk	C2(Carbamidomethyl)	0	3.75188e+07	3.42464	3	1531.72	0.516918	19.6865	0
	High	VYRDIVNAVSTK	2	34	34	unk		0	8.18907e+07	3.28806	3	1364.75	-0.508276	29.3593	1
	High	AGYAAGVAcDSGTNNAEcK	1	34	34	unk	C9(Carbamidomethyl); C18(Carbamidomethyl)	0	2.36936e+07	3.11266	2	1915.79	2.01384	23.9223	0
	High	cTIEPAYTSGDAFTK	1	34	34	unk	C1(Carbamidomethyl)	0	5.9169e+07	2.33041	2	1660.75	0.876998	32.6159	0
unk	len=913 - [Mii65436_c1_g1_i1_2]	15.3305	19.74	1	0	4	5	5.95262e+07	304	32.3014	7.1958
	A2	Sequence	# PSMs	# Proteins	# Protein Groups	Protein Group Accessions	Modifications	ΔCn	Area	XCorr	Charge	MH+ [Da]	ΔM [ppm]	RT [min]	# Missed Cleavages
	High	TcQDGSSTAHQVIK	1	34	34	unk	C2(Carbamidomethyl)	0	3.75188e+07	3.42464	3	1531.72	0.516918	19.6865	0
	High	VYRDIVNAVSTK	2	34	34	unk		0	8.18907e+07	3.28806	3	1364.75	-0.508276	29.3593	1
	High	AGYAAGVAcDSGTNNAEcK	1	34	34	unk	C9(Carbamidomethyl); C18(Carbamidomethyl)	0	2.36936e+07	3.11266	2	1915.79	2.01384	23.9223	0
	High	cTIEPAYTSGDAFTK	1	34	34	unk	C1(Carbamidomethyl)	0	5.9169e+07	2.33041	2	1660.75	0.876998	32.6159	0
unk	len=657 - [Mii70376_c0_g1_i1_2]	13.6703	9.13	1	0	3	4	8.06517e+07	219	23.3308	4.51318
	A2	Sequence	# PSMs	# Proteins	# Protein Groups	Protein Group Accessions	Modifications	ΔCn	Area	XCorr	Charge	MH+ [Da]	ΔM [ppm]	RT [min]	# Missed Cleavages
	High	TDLIPKDNIDISFPNNPERK	2	2	2	unk		0	100834484	3.87882	3	2326.2	0.327871	37.3711	2
	High	TDLIPKDNIDISFPNNPER	1	2	2	unk		0	79280585	3.64894	3	2198.11	2.20705	39.3039	1
	High	DNIDISFPNNPERK	1	2	2	unk		0	61839978	2.79197	3	1658.82	1.34711	33.2887	1
unk	len=650 - [Mii70376_c0_g1_i2_1]	13.6703	9.22	1	0	3	4	8.06517e+07	217	23.1206	4.4624
	A2	Sequence	# PSMs	# Proteins	# Protein Groups	Protein Group Accessions	Modifications	ΔCn	Area	XCorr	Charge	MH+ [Da]	ΔM [ppm]	RT [min]	# Missed Cleavages
	High	TDLIPKDNIDISFPNNPERK	2	2	2	unk		0	100834484	3.87882	3	2326.2	0.327871	37.3711	2
	High	TDLIPKDNIDISFPNNPER	1	2	2	unk		0	79280585	3.64894	3	2198.11	2.20705	39.3039	1
	High	DNIDISFPNNPERK	1	2	2	unk		0	61839978	2.79197	3	1658.82	1.34711	33.2887	1
unk	len=4125 - [Mii70735_c0_g1_i1_4]	6.05441	1.6	1	0	1	2	2.44833e+07	1375	151.59	5.08447
	A2	Sequence	# PSMs	# Proteins	# Protein Groups	Protein Group Accessions	Modifications	ΔCn	Area	XCorr	Charge	MH+ [Da]	ΔM [ppm]	RT [min]	# Missed Cleavages
	High	TVKNPASFGGRPcTDQNVQSER	2	2	2	unk	C13(Carbamidomethyl)	0	2.44833e+07	3.25651	4	2448.17	1.8132	24.4264	1
unk	len=4074 - [Mii73053_c0_g1_i1_3]	6.05441	1.62	1	0	1	2	2.44833e+07	1357	149.329	5.0083
	A2	Sequence	# PSMs	# Proteins	# Protein Groups	Protein Group Accessions	Modifications	ΔCn	Area	XCorr	Charge	MH+ [Da]	ΔM [ppm]	RT [min]	# Missed Cleavages
	High	TVKNPASFGGRPcTDQNVQSER	2	2	2	unk	C13(Carbamidomethyl)	0	2.44833e+07	3.25651	4	2448.17	1.8132	24.4264	1
unk	len=648 - [Mii40867_c0_g1_i1_4]	5.52922	16.67	1	1	1	2	1.49333e+07	216	23.9395	5.87158
	A2	Sequence	# PSMs	# Proteins	# Protein Groups	Protein Group Accessions	Modifications	ΔCn	Area	XCorr	Charge	MH+ [Da]	ΔM [ppm]	RT [min]	# Missed Cleavages
	High	LRPTNDKGLDITGDSSVR	2	1	1	unk		0	1.49333e+07	3.01942	3	1944.02	3.21799	27.0269	1
unk	len=2379 - [Mii71524_c0_g1_i1_1]	4.68151	1.39	1	1	1	2	1.2773e+08	793	89.5334	9.70068
	A2	Sequence	# PSMs	# Proteins	# Protein Groups	Protein Group Accessions	Modifications	ΔCn	Area	XCorr	Charge	MH+ [Da]	ΔM [ppm]	RT [min]	# Missed Cleavages
	High	NKSIEIDTNIR	2	1	1	unk		0	1.2773e+08	2.55046	3	1302.7	1.12889	27.7384	1
unk	len=722 - [Mii59191_c0_g1_i1_4]	2.98262	5.42	1	0	1	1	3.68445e+07	240	27.4797	8.35303
	A2	Sequence	# PSMs	# Proteins	# Protein Groups	Protein Group Accessions	Modifications	ΔCn	Area	XCorr	Charge	MH+ [Da]	ΔM [ppm]	RT [min]	# Missed Cleavages
	High	DNVDISFPNNPER	1	4	4	unk		0	3.68445e+07	2.98262	2	1516.71	3.42982	33.9235	0
unk	len=804 - [Mii59191_c0_g2_i1_4]	2.98262	4.85	1	0	1	1	3.68445e+07	268	31.3165	8.67529
	A2	Sequence	# PSMs	# Proteins	# Protein Groups	Protein Group Accessions	Modifications	ΔCn	Area	XCorr	Charge	MH+ [Da]	ΔM [ppm]	RT [min]	# Missed Cleavages
	High	DNVDISFPNNPER	1	4	4	unk		0	3.68445e+07	2.98262	2	1516.71	3.42982	33.9235	0
unk	len=763 - [Mii64875_c0_g2_i1_5]	2.81036	7.87	1	0	1	1	2579105024	254	29.6472	8.26514
	A2	Sequence	# PSMs	# Proteins	# Protein Groups	Protein Group Accessions	Modifications	ΔCn	Area	XCorr	Charge	MH+ [Da]	ΔM [ppm]	RT [min]	# Missed Cleavages
	High	SLNcIAMmLFKTIHSRCMHR	1	2	2	unk	C4(Carbamidomethyl); M8(Oxidation)	0	2579105024	2.81036	4	2465.19	0.424274	37.2976	2
unk	len=774 - [Mii64875_c0_g2_i2_5]	2.81036	7.78	1	0	1	1	2579105024	257	30.1336	9.48096
	A2	Sequence	# PSMs	# Proteins	# Protein Groups	Protein Group Accessions	Modifications	ΔCn	Area	XCorr	Charge	MH+ [Da]	ΔM [ppm]	RT [min]	# Missed Cleavages
	High	SLNcIAMmLFKTIHSRCMHR	1	2	2	unk	C4(Carbamidomethyl); M8(Oxidation)	0	2579105024	2.81036	4	2465.19	0.424274	37.2976	2
unk	len=3528 - [Mii77765_c0_g2_i3_3]	2.66198	3.83	1	0	1	1		1175	134.976	9.27588
	A2	Sequence	# PSMs	# Proteins	# Protein Groups	Protein Group Accessions	Modifications	ΔCn	Area	XCorr	Charge	MH+ [Da]	ΔM [ppm]	RT [min]	# Missed Cleavages
	High	RNDSLSmxPFFVASTVIPSAAYccRSSFGTSFPLMTITGGIcSPR	1	6	6	unk	M7(Oxidation); X8(L); C23(Carbamidomethyl); C24(Carbamidomethyl); C42(Carbamidomethyl)	0	0	2.66198	4	4975.35	-4.66887	42.0198	2
unk	len=2573 - [Mii77765_c0_g2_i5_3]	2.66198	5.25	1	0	1	1		857	98.1442	9.02686
	A2	Sequence	# PSMs	# Proteins	# Protein Groups	Protein Group Accessions	Modifications	ΔCn	Area	XCorr	Charge	MH+ [Da]	ΔM [ppm]	RT [min]	# Missed Cleavages
	High	RNDSLSmxPFFVASTVIPSAAYccRSSFGTSFPLMTITGGIcSPR	1	6	6	unk	M7(Oxidation); X8(L); C23(Carbamidomethyl); C24(Carbamidomethyl); C42(Carbamidomethyl)	0	0	2.66198	4	4975.35	-4.66887	42.0198	2
unk	len=3775 - [Mii77765_c0_g2_i8_3]	2.66198	3.58	1	0	1	1		1257	144.465	9.34912
	A2	Sequence	# PSMs	# Proteins	# Protein Groups	Protein Group Accessions	Modifications	ΔCn	Area	XCorr	Charge	MH+ [Da]	ΔM [ppm]	RT [min]	# Missed Cleavages
	High	RNDSLSmxPFFVASTVIPSAAYccRSSFGTSFPLMTITGGIcSPR	1	6	6	unk	M7(Oxidation); X8(L); C23(Carbamidomethyl); C24(Carbamidomethyl); C42(Carbamidomethyl)	0	0	2.66198	4	4975.35	-4.66887	42.0198	2
unk	len=2567 - [Mii77765_c0_g2_i11_1]	2.66198	5.26	1	0	1	1		855	97.9643	9.01221
	A2	Sequence	# PSMs	# Proteins	# Protein Groups	Protein Group Accessions	Modifications	ΔCn	Area	XCorr	Charge	MH+ [Da]	ΔM [ppm]	RT [min]	# Missed Cleavages
	High	RNDSLSmxPFFVASTVIPSAAYccRSSFGTSFPLMTITGGIcSPR	1	6	6	unk	M7(Oxidation); X8(L); C23(Carbamidomethyl); C24(Carbamidomethyl); C42(Carbamidomethyl)	0	0	2.66198	4	4975.35	-4.66887	42.0198	2
unk	len=3063 - [Mii79799_c0_g3_i1_5]	2.66198	4.41	1	0	1	1		1020	117.132	9.34912
	A2	Sequence	# PSMs	# Proteins	# Protein Groups	Protein Group Accessions	Modifications	ΔCn	Area	XCorr	Charge	MH+ [Da]	ΔM [ppm]	RT [min]	# Missed Cleavages
	High	RNDSLSmxPFFVASTVIPSAAYccRSSFGTSFPLMTITGGIcSPR	1	6	6	unk	M7(Oxidation); X8(L); C23(Carbamidomethyl); C24(Carbamidomethyl); C42(Carbamidomethyl)	0	0	2.66198	4	4975.35	-4.66887	42.0198	2
unk	len=3204 - [Mii79799_c0_g3_i4_6]	2.66198	4.21	1	0	1	1		1068	122.423	9.36377
	A2	Sequence	# PSMs	# Proteins	# Protein Groups	Protein Group Accessions	Modifications	ΔCn	Area	XCorr	Charge	MH+ [Da]	ΔM [ppm]	RT [min]	# Missed Cleavages
	High	RNDSLSmxPFFVASTVIPSAAYccRSSFGTSFPLMTITGGIcSPR	1	6	6	unk	M7(Oxidation); X8(L); C23(Carbamidomethyl); C24(Carbamidomethyl); C42(Carbamidomethyl)	0	0	2.66198	4	4975.35	-4.66887	42.0198	2
unk	len=2355 - [Mii74105_c1_g1_i1_6]	2.55915	1.53	1	0	1	1	3.33852e+07	785	85.1678	4.66553
	A2	Sequence	# PSMs	# Proteins	# Protein Groups	Protein Group Accessions	Modifications	ΔCn	Area	XCorr	Charge	MH+ [Da]	ΔM [ppm]	RT [min]	# Missed Cleavages
	High	LRPSANQGLQLK	1	2	2	unk		0	3.33852e+07	2.55915	3	1324.77	2.39963	26.4099	0
unk	len=2382 - [Mii74105_c1_g1_i2_6]	2.55915	1.51	1	0	1	1	3.33852e+07	794	85.9632	4.66553
	A2	Sequence	# PSMs	# Proteins	# Protein Groups	Protein Group Accessions	Modifications	ΔCn	Area	XCorr	Charge	MH+ [Da]	ΔM [ppm]	RT [min]	# Missed Cleavages
	High	LRPSANQGLQLK	1	2	2	unk		0	3.33852e+07	2.55915	3	1324.77	2.39963	26.4099	0
unk	len=658 - [Mii71061_c1_g1_i4_6]	2.47615	9.17	1	0	1	1		218	26.0726	10.0229
	A2	Sequence	# PSMs	# Proteins	# Protein Groups	Protein Group Accessions	Modifications	ΔCn	Area	XCorr	Charge	MH+ [Da]	ΔM [ppm]	RT [min]	# Missed Cleavages
	High	NcSIxCFNLYISYRKPNmSK	1	2	2	unk	C2(Carbamidomethyl); X5(L); M18(Oxidation)	0	0	2.47615	3	2467.19	-0.0251089	37.1611	1
unk	len=700 - [Mii71061_c1_g1_i5_6]	2.47615	8.62	1	0	1	1		232	27.6195	9.86182
	A2	Sequence	# PSMs	# Proteins	# Protein Groups	Protein Group Accessions	Modifications	ΔCn	Area	XCorr	Charge	MH+ [Da]	ΔM [ppm]	RT [min]	# Missed Cleavages
	High	NcSIxCFNLYISYRKPNmSK	1	2	2	unk	C2(Carbamidomethyl); X5(L); M18(Oxidation)	0	0	2.47615	3	2467.19	-0.0251089	37.1611	1
unk	len=1173 - [Mii65893_c1_g1_i1_4]	2.39736	2.56	1	1	1	1	3.09547e+07	391	45.8064	9.45166
	A2	Sequence	# PSMs	# Proteins	# Protein Groups	Protein Group Accessions	Modifications	ΔCn	Area	XCorr	Charge	MH+ [Da]	ΔM [ppm]	RT [min]	# Missed Cleavages
	High	DYTENLNTLR	1	1	1	unk		0	3.09547e+07	2.39736	2	1238.61	3.68898	32.15	0

## Sheet: footprints of tail amp animals3
Accession	Description	Score	Coverage	# Proteins	# Unique Peptides	# Peptides	# PSMs	Area	# AAs	MW [kDa]	calc. pI
unk	len=1034 - [Mii61805_c3_g1_i1_5]	19.8029	17.44	1	0	4	6	7.27528e+07	344	37.1517	7.41553
	A2	Sequence	# PSMs	# Proteins	# Protein Groups	Protein Group Accessions	Modifications	ΔCn	Area	XCorr	Charge	MH+ [Da]	ΔM [ppm]	RT [min]	# Missed Cleavages
	High	AGYAAGVAcDSGTNNAEcK	2	34	34	unk	C9(Carbamidomethyl); C18(Carbamidomethyl)	0	2.86083e+07	4.10071	2	1915.8	2.20499	23.8671	0
	High	TcQDGSSTAHQVIK	1	34	34	unk	C2(Carbamidomethyl)	0	5.35694e+07	3.61331	3	1531.72	1.47326	19.7507	0
	High	VYRDIVNAVSTK	2	34	34	unk		0	9.44251e+07	3.40518	3	1364.75	0.430896	29.266	1
	High	cTIEPAYTSGDAFTK	1	34	34	unk	C1(Carbamidomethyl)	0	70263842	2.58973	2	1660.75	0.876998	32.5119	0
unk	len=1021 - [Mii61805_c3_g2_i1_4]	19.8029	17.65	1	0	4	6	7.27528e+07	340	36.5984	6.72705
	A2	Sequence	# PSMs	# Proteins	# Protein Groups	Protein Group Accessions	Modifications	ΔCn	Area	XCorr	Charge	MH+ [Da]	ΔM [ppm]	RT [min]	# Missed Cleavages
	High	AGYAAGVAcDSGTNNAEcK	2	34	34	unk	C9(Carbamidomethyl); C18(Carbamidomethyl)	0	2.86083e+07	4.10071	2	1915.8	2.20499	23.8671	0
	High	TcQDGSSTAHQVIK	1	34	34	unk	C2(Carbamidomethyl)	0	5.35694e+07	3.61331	3	1531.72	1.47326	19.7507	0
	High	VYRDIVNAVSTK	2	34	34	unk		0	9.44251e+07	3.40518	3	1364.75	0.430896	29.266	1
	High	cTIEPAYTSGDAFTK	1	34	34	unk	C1(Carbamidomethyl)	0	70263842	2.58973	2	1660.75	0.876998	32.5119	0
unk	len=1001 - [Mii61805_c3_g3_i1_5]	19.8029	18.02	1	0	4	6	7.27528e+07	333	35.752	6.96143
	A2	Sequence	# PSMs	# Proteins	# Protein Groups	Protein Group Accessions	Modifications	ΔCn	Area	XCorr	Charge	MH+ [Da]	ΔM [ppm]	RT [min]	# Missed Cleavages
	High	AGYAAGVAcDSGTNNAEcK	2	34	34	unk	C9(Carbamidomethyl); C18(Carbamidomethyl)	0	2.86083e+07	4.10071	2	1915.8	2.20499	23.8671	0
	High	TcQDGSSTAHQVIK	1	34	34	unk	C2(Carbamidomethyl)	0	5.35694e+07	3.61331	3	1531.72	1.47326	19.7507	0
	High	VYRDIVNAVSTK	2	34	34	unk		0	9.44251e+07	3.40518	3	1364.75	0.430896	29.266	1
	High	cTIEPAYTSGDAFTK	1	34	34	unk	C1(Carbamidomethyl)	0	70263842	2.58973	2	1660.75	0.876998	32.5119	0
unk	len=1021 - [Mii61805_c3_g4_i1_4]	19.8029	17.65	1	0	4	6	7.27528e+07	340	36.6985	6.96143
	A2	Sequence	# PSMs	# Proteins	# Protein Groups	Protein Group Accessions	Modifications	ΔCn	Area	XCorr	Charge	MH+ [Da]	ΔM [ppm]	RT [min]	# Missed Cleavages
	High	AGYAAGVAcDSGTNNAEcK	2	34	34	unk	C9(Carbamidomethyl); C18(Carbamidomethyl)	0	2.86083e+07	4.10071	2	1915.8	2.20499	23.8671	0
	High	TcQDGSSTAHQVIK	1	34	34	unk	C2(Carbamidomethyl)	0	5.35694e+07	3.61331	3	1531.72	1.47326	19.7507	0
	High	VYRDIVNAVSTK	2	34	34	unk		0	9.44251e+07	3.40518	3	1364.75	0.430896	29.266	1
	High	cTIEPAYTSGDAFTK	1	34	34	unk	C1(Carbamidomethyl)	0	70263842	2.58973	2	1660.75	0.876998	32.5119	0
unk	len=1024 - [Mii61805_c3_g5_i1_4]	19.8029	17.6	1	0	4	6	7.27528e+07	341	36.8096	7.1958
	A2	Sequence	# PSMs	# Proteins	# Protein Groups	Protein Group Accessions	Modifications	ΔCn	Area	XCorr	Charge	MH+ [Da]	ΔM [ppm]	RT [min]	# Missed Cleavages
	High	AGYAAGVAcDSGTNNAEcK	2	34	34	unk	C9(Carbamidomethyl); C18(Carbamidomethyl)	0	2.86083e+07	4.10071	2	1915.8	2.20499	23.8671	0
	High	TcQDGSSTAHQVIK	1	34	34	unk	C2(Carbamidomethyl)	0	5.35694e+07	3.61331	3	1531.72	1.47326	19.7507	0
	High	VYRDIVNAVSTK	2	34	34	unk		0	9.44251e+07	3.40518	3	1364.75	0.430896	29.266	1
	High	cTIEPAYTSGDAFTK	1	34	34	unk	C1(Carbamidomethyl)	0	70263842	2.58973	2	1660.75	0.876998	32.5119	0
unk	len=1024 - [Mii61805_c3_g6_i1_4]	19.8029	17.6	1	0	4	6	7.27528e+07	341	36.8676	7.1958
	A2	Sequence	# PSMs	# Proteins	# Protein Groups	Protein Group Accessions	Modifications	ΔCn	Area	XCorr	Charge	MH+ [Da]	ΔM [ppm]	RT [min]	# Missed Cleavages
	High	AGYAAGVAcDSGTNNAEcK	2	34	34	unk	C9(Carbamidomethyl); C18(Carbamidomethyl)	0	2.86083e+07	4.10071	2	1915.8	2.20499	23.8671	0
	High	TcQDGSSTAHQVIK	1	34	34	unk	C2(Carbamidomethyl)	0	5.35694e+07	3.61331	3	1531.72	1.47326	19.7507	0
	High	VYRDIVNAVSTK	2	34	34	unk		0	9.44251e+07	3.40518	3	1364.75	0.430896	29.266	1
	High	cTIEPAYTSGDAFTK	1	34	34	unk	C1(Carbamidomethyl)	0	70263842	2.58973	2	1660.75	0.876998	32.5119	0
unk	len=1024 - [Mii61805_c3_g7_i1_4]	19.8029	17.6	1	0	4	6	7.27528e+07	341	36.7955	7.1958
	A2	Sequence	# PSMs	# Proteins	# Protein Groups	Protein Group Accessions	Modifications	ΔCn	Area	XCorr	Charge	MH+ [Da]	ΔM [ppm]	RT [min]	# Missed Cleavages
	High	AGYAAGVAcDSGTNNAEcK	2	34	34	unk	C9(Carbamidomethyl); C18(Carbamidomethyl)	0	2.86083e+07	4.10071	2	1915.8	2.20499	23.8671	0
	High	TcQDGSSTAHQVIK	1	34	34	unk	C2(Carbamidomethyl)	0	5.35694e+07	3.61331	3	1531.72	1.47326	19.7507	0
	High	VYRDIVNAVSTK	2	34	34	unk		0	9.44251e+07	3.40518	3	1364.75	0.430896	29.266	1
	High	cTIEPAYTSGDAFTK	1	34	34	unk	C1(Carbamidomethyl)	0	70263842	2.58973	2	1660.75	0.876998	32.5119	0
unk	len=1021 - [Mii61805_c3_g8_i1_4]	19.8029	17.65	1	0	4	6	7.27528e+07	340	36.7005	6.96143
	A2	Sequence	# PSMs	# Proteins	# Protein Groups	Protein Group Accessions	Modifications	ΔCn	Area	XCorr	Charge	MH+ [Da]	ΔM [ppm]	RT [min]	# Missed Cleavages
	High	AGYAAGVAcDSGTNNAEcK	2	34	34	unk	C9(Carbamidomethyl); C18(Carbamidomethyl)	0	2.86083e+07	4.10071	2	1915.8	2.20499	23.8671	0
	High	TcQDGSSTAHQVIK	1	34	34	unk	C2(Carbamidomethyl)	0	5.35694e+07	3.61331	3	1531.72	1.47326	19.7507	0
	High	VYRDIVNAVSTK	2	34	34	unk		0	9.44251e+07	3.40518	3	1364.75	0.430896	29.266	1
	High	cTIEPAYTSGDAFTK	1	34	34	unk	C1(Carbamidomethyl)	0	70263842	2.58973	2	1660.75	0.876998	32.5119	0
unk	len=1021 - [Mii61805_c3_g9_i1_4]	19.8029	17.65	1	0	4	6	7.27528e+07	340	36.6014	6.72705
	A2	Sequence	# PSMs	# Proteins	# Protein Groups	Protein Group Accessions	Modifications	ΔCn	Area	XCorr	Charge	MH+ [Da]	ΔM [ppm]	RT [min]	# Missed Cleavages
	High	AGYAAGVAcDSGTNNAEcK	2	34	34	unk	C9(Carbamidomethyl); C18(Carbamidomethyl)	0	2.86083e+07	4.10071	2	1915.8	2.20499	23.8671	0
	High	TcQDGSSTAHQVIK	1	34	34	unk	C2(Carbamidomethyl)	0	5.35694e+07	3.61331	3	1531.72	1.47326	19.7507	0
	High	VYRDIVNAVSTK	2	34	34	unk		0	9.44251e+07	3.40518	3	1364.75	0.430896	29.266	1
	High	cTIEPAYTSGDAFTK	1	34	34	unk	C1(Carbamidomethyl)	0	70263842	2.58973	2	1660.75	0.876998	32.5119	0
unk	len=1024 - [Mii61805_c3_g10_i1_4]	19.8029	17.6	1	0	4	6	7.27528e+07	341	36.7965	6.96143
	A2	Sequence	# PSMs	# Proteins	# Protein Groups	Protein Group Accessions	Modifications	ΔCn	Area	XCorr	Charge	MH+ [Da]	ΔM [ppm]	RT [min]	# Missed Cleavages
	High	AGYAAGVAcDSGTNNAEcK	2	34	34	unk	C9(Carbamidomethyl); C18(Carbamidomethyl)	0	2.86083e+07	4.10071	2	1915.8	2.20499	23.8671	0
	High	TcQDGSSTAHQVIK	1	34	34	unk	C2(Carbamidomethyl)	0	5.35694e+07	3.61331	3	1531.72	1.47326	19.7507	0
	High	VYRDIVNAVSTK	2	34	34	unk		0	9.44251e+07	3.40518	3	1364.75	0.430896	29.266	1
	High	cTIEPAYTSGDAFTK	1	34	34	unk	C1(Carbamidomethyl)	0	70263842	2.58973	2	1660.75	0.876998	32.5119	0
unk	len=1039 - [Mii61805_c3_g11_i1_4]	19.8029	17.34	1	0	4	6	7.27528e+07	346	37.4088	7.1958
	A2	Sequence	# PSMs	# Proteins	# Protein Groups	Protein Group Accessions	Modifications	ΔCn	Area	XCorr	Charge	MH+ [Da]	ΔM [ppm]	RT [min]	# Missed Cleavages
	High	AGYAAGVAcDSGTNNAEcK	2	34	34	unk	C9(Carbamidomethyl); C18(Carbamidomethyl)	0	2.86083e+07	4.10071	2	1915.8	2.20499	23.8671	0
	High	TcQDGSSTAHQVIK	1	34	34	unk	C2(Carbamidomethyl)	0	5.35694e+07	3.61331	3	1531.72	1.47326	19.7507	0
	High	VYRDIVNAVSTK	2	34	34	unk		0	9.44251e+07	3.40518	3	1364.75	0.430896	29.266	1
	High	cTIEPAYTSGDAFTK	1	34	34	unk	C1(Carbamidomethyl)	0	70263842	2.58973	2	1660.75	0.876998	32.5119	0
unk	len=1021 - [Mii61805_c3_g12_i1_4]	19.8029	17.65	1	0	4	6	7.27528e+07	340	36.5974	6.96143
	A2	Sequence	# PSMs	# Proteins	# Protein Groups	Protein Group Accessions	Modifications	ΔCn	Area	XCorr	Charge	MH+ [Da]	ΔM [ppm]	RT [min]	# Missed Cleavages
	High	AGYAAGVAcDSGTNNAEcK	2	34	34	unk	C9(Carbamidomethyl); C18(Carbamidomethyl)	0	2.86083e+07	4.10071	2	1915.8	2.20499	23.8671	0
	High	TcQDGSSTAHQVIK	1	34	34	unk	C2(Carbamidomethyl)	0	5.35694e+07	3.61331	3	1531.72	1.47326	19.7507	0
	High	VYRDIVNAVSTK	2	34	34	unk		0	9.44251e+07	3.40518	3	1364.75	0.430896	29.266	1
	High	cTIEPAYTSGDAFTK	1	34	34	unk	C1(Carbamidomethyl)	0	70263842	2.58973	2	1660.75	0.876998	32.5119	0
unk	len=1015 - [Mii61805_c3_g13_i1_4]	19.8029	17.75	1	0	4	6	7.27528e+07	338	36.4674	6.96143
	A2	Sequence	# PSMs	# Proteins	# Protein Groups	Protein Group Accessions	Modifications	ΔCn	Area	XCorr	Charge	MH+ [Da]	ΔM [ppm]	RT [min]	# Missed Cleavages
	High	AGYAAGVAcDSGTNNAEcK	2	34	34	unk	C9(Carbamidomethyl); C18(Carbamidomethyl)	0	2.86083e+07	4.10071	2	1915.8	2.20499	23.8671	0
	High	TcQDGSSTAHQVIK	1	34	34	unk	C2(Carbamidomethyl)	0	5.35694e+07	3.61331	3	1531.72	1.47326	19.7507	0
	High	VYRDIVNAVSTK	2	34	34	unk		0	9.44251e+07	3.40518	3	1364.75	0.430896	29.266	1
	High	cTIEPAYTSGDAFTK	1	34	34	unk	C1(Carbamidomethyl)	0	70263842	2.58973	2	1660.75	0.876998	32.5119	0
unk	len=1024 - [Mii61805_c3_g14_i1_4]	19.8029	17.6	1	0	4	6	7.27528e+07	341	36.8376	7.1958
	A2	Sequence	# PSMs	# Proteins	# Protein Groups	Protein Group Accessions	Modifications	ΔCn	Area	XCorr	Charge	MH+ [Da]	ΔM [ppm]	RT [min]	# Missed Cleavages
	High	AGYAAGVAcDSGTNNAEcK	2	34	34	unk	C9(Carbamidomethyl); C18(Carbamidomethyl)	0	2.86083e+07	4.10071	2	1915.8	2.20499	23.8671	0
	High	TcQDGSSTAHQVIK	1	34	34	unk	C2(Carbamidomethyl)	0	5.35694e+07	3.61331	3	1531.72	1.47326	19.7507	0
	High	VYRDIVNAVSTK	2	34	34	unk		0	9.44251e+07	3.40518	3	1364.75	0.430896	29.266	1
	High	cTIEPAYTSGDAFTK	1	34	34	unk	C1(Carbamidomethyl)	0	70263842	2.58973	2	1660.75	0.876998	32.5119	0
unk	len=1021 - [Mii61805_c3_g16_i1_4]	19.8029	17.65	1	0	4	6	7.27528e+07	340	36.6294	6.72705
	A2	Sequence	# PSMs	# Proteins	# Protein Groups	Protein Group Accessions	Modifications	ΔCn	Area	XCorr	Charge	MH+ [Da]	ΔM [ppm]	RT [min]	# Missed Cleavages
	High	AGYAAGVAcDSGTNNAEcK	2	34	34	unk	C9(Carbamidomethyl); C18(Carbamidomethyl)	0	2.86083e+07	4.10071	2	1915.8	2.20499	23.8671	0
	High	TcQDGSSTAHQVIK	1	34	34	unk	C2(Carbamidomethyl)	0	5.35694e+07	3.61331	3	1531.72	1.47326	19.7507	0
	High	VYRDIVNAVSTK	2	34	34	unk		0	9.44251e+07	3.40518	3	1364.75	0.430896	29.266	1
	High	cTIEPAYTSGDAFTK	1	34	34	unk	C1(Carbamidomethyl)	0	70263842	2.58973	2	1660.75	0.876998	32.5119	0
unk	len=1021 - [Mii61805_c3_g17_i1_4]	19.8029	17.65	1	0	4	6	7.27528e+07	340	36.7015	6.96143
	A2	Sequence	# PSMs	# Proteins	# Protein Groups	Protein Group Accessions	Modifications	ΔCn	Area	XCorr	Charge	MH+ [Da]	ΔM [ppm]	RT [min]	# Missed Cleavages
	High	AGYAAGVAcDSGTNNAEcK	2	34	34	unk	C9(Carbamidomethyl); C18(Carbamidomethyl)	0	2.86083e+07	4.10071	2	1915.8	2.20499	23.8671	0
	High	TcQDGSSTAHQVIK	1	34	34	unk	C2(Carbamidomethyl)	0	5.35694e+07	3.61331	3	1531.72	1.47326	19.7507	0
	High	VYRDIVNAVSTK	2	34	34	unk		0	9.44251e+07	3.40518	3	1364.75	0.430896	29.266	1
	High	cTIEPAYTSGDAFTK	1	34	34	unk	C1(Carbamidomethyl)	0	70263842	2.58973	2	1660.75	0.876998	32.5119	0
unk	len=1021 - [Mii61805_c3_g19_i1_4]	19.8029	17.65	1	0	4	6	7.27528e+07	340	36.6254	6.96143
	A2	Sequence	# PSMs	# Proteins	# Protein Groups	Protein Group Accessions	Modifications	ΔCn	Area	XCorr	Charge	MH+ [Da]	ΔM [ppm]	RT [min]	# Missed Cleavages
	High	AGYAAGVAcDSGTNNAEcK	2	34	34	unk	C9(Carbamidomethyl); C18(Carbamidomethyl)	0	2.86083e+07	4.10071	2	1915.8	2.20499	23.8671	0
	High	TcQDGSSTAHQVIK	1	34	34	unk	C2(Carbamidomethyl)	0	5.35694e+07	3.61331	3	1531.72	1.47326	19.7507	0
	High	VYRDIVNAVSTK	2	34	34	unk		0	9.44251e+07	3.40518	3	1364.75	0.430896	29.266	1
	High	cTIEPAYTSGDAFTK	1	34	34	unk	C1(Carbamidomethyl)	0	70263842	2.58973	2	1660.75	0.876998	32.5119	0
unk	len=1021 - [Mii61805_c3_g20_i1_4]	19.8029	17.65	1	0	4	6	7.27528e+07	340	36.6714	6.72705
	A2	Sequence	# PSMs	# Proteins	# Protein Groups	Protein Group Accessions	Modifications	ΔCn	Area	XCorr	Charge	MH+ [Da]	ΔM [ppm]	RT [min]	# Missed Cleavages
	High	AGYAAGVAcDSGTNNAEcK	2	34	34	unk	C9(Carbamidomethyl); C18(Carbamidomethyl)	0	2.86083e+07	4.10071	2	1915.8	2.20499	23.8671	0
	High	TcQDGSSTAHQVIK	1	34	34	unk	C2(Carbamidomethyl)	0	5.35694e+07	3.61331	3	1531.72	1.47326	19.7507	0
	High	VYRDIVNAVSTK	2	34	34	unk		0	9.44251e+07	3.40518	3	1364.75	0.430896	29.266	1
	High	cTIEPAYTSGDAFTK	1	34	34	unk	C1(Carbamidomethyl)	0	70263842	2.58973	2	1660.75	0.876998	32.5119	0
unk	len=1024 - [Mii61805_c3_g21_i1_4]	19.8029	17.6	1	0	4	6	7.27528e+07	341	36.8396	7.1958
	A2	Sequence	# PSMs	# Proteins	# Protein Groups	Protein Group Accessions	Modifications	ΔCn	Area	XCorr	Charge	MH+ [Da]	ΔM [ppm]	RT [min]	# Missed Cleavages
	High	AGYAAGVAcDSGTNNAEcK	2	34	34	unk	C9(Carbamidomethyl); C18(Carbamidomethyl)	0	2.86083e+07	4.10071	2	1915.8	2.20499	23.8671	0
	High	TcQDGSSTAHQVIK	1	34	34	unk	C2(Carbamidomethyl)	0	5.35694e+07	3.61331	3	1531.72	1.47326	19.7507	0
	High	VYRDIVNAVSTK	2	34	34	unk		0	9.44251e+07	3.40518	3	1364.75	0.430896	29.266	1
	High	cTIEPAYTSGDAFTK	1	34	34	unk	C1(Carbamidomethyl)	0	70263842	2.58973	2	1660.75	0.876998	32.5119	0
unk	len=1021 - [Mii61805_c3_g22_i1_4]	19.8029	17.65	1	0	4	6	7.27528e+07	340	36.6705	6.96143
	A2	Sequence	# PSMs	# Proteins	# Protein Groups	Protein Group Accessions	Modifications	ΔCn	Area	XCorr	Charge	MH+ [Da]	ΔM [ppm]	RT [min]	# Missed Cleavages
	High	AGYAAGVAcDSGTNNAEcK	2	34	34	unk	C9(Carbamidomethyl); C18(Carbamidomethyl)	0	2.86083e+07	4.10071	2	1915.8	2.20499	23.8671	0
	High	TcQDGSSTAHQVIK	1	34	34	unk	C2(Carbamidomethyl)	0	5.35694e+07	3.61331	3	1531.72	1.47326	19.7507	0
	High	VYRDIVNAVSTK	2	34	34	unk		0	9.44251e+07	3.40518	3	1364.75	0.430896	29.266	1
	High	cTIEPAYTSGDAFTK	1	34	34	unk	C1(Carbamidomethyl)	0	70263842	2.58973	2	1660.75	0.876998	32.5119	0
unk	len=987 - [Mii61805_c3_g23_i1_6]	19.8029	18.29	1	0	4	6	7.27528e+07	328	35.2687	6.96143
	A2	Sequence	# PSMs	# Proteins	# Protein Groups	Protein Group Accessions	Modifications	ΔCn	Area	XCorr	Charge	MH+ [Da]	ΔM [ppm]	RT [min]	# Missed Cleavages
	High	AGYAAGVAcDSGTNNAEcK	2	34	34	unk	C9(Carbamidomethyl); C18(Carbamidomethyl)	0	2.86083e+07	4.10071	2	1915.8	2.20499	23.8671	0
	High	TcQDGSSTAHQVIK	1	34	34	unk	C2(Carbamidomethyl)	0	5.35694e+07	3.61331	3	1531.72	1.47326	19.7507	0
	High	VYRDIVNAVSTK	2	34	34	unk		0	9.44251e+07	3.40518	3	1364.75	0.430896	29.266	1
	High	cTIEPAYTSGDAFTK	1	34	34	unk	C1(Carbamidomethyl)	0	70263842	2.58973	2	1660.75	0.876998	32.5119	0
unk	len=1034 - [Mii61805_c3_g24_i1_5]	19.8029	17.44	1	0	4	6	7.27528e+07	344	37.1527	7.1958
	A2	Sequence	# PSMs	# Proteins	# Protein Groups	Protein Group Accessions	Modifications	ΔCn	Area	XCorr	Charge	MH+ [Da]	ΔM [ppm]	RT [min]	# Missed Cleavages
	High	AGYAAGVAcDSGTNNAEcK	2	34	34	unk	C9(Carbamidomethyl); C18(Carbamidomethyl)	0	2.86083e+07	4.10071	2	1915.8	2.20499	23.8671	0
	High	TcQDGSSTAHQVIK	1	34	34	unk	C2(Carbamidomethyl)	0	5.35694e+07	3.61331	3	1531.72	1.47326	19.7507	0
	High	VYRDIVNAVSTK	2	34	34	unk		0	9.44251e+07	3.40518	3	1364.75	0.430896	29.266	1
	High	cTIEPAYTSGDAFTK	1	34	34	unk	C1(Carbamidomethyl)	0	70263842	2.58973	2	1660.75	0.876998	32.5119	0
unk	len=1021 - [Mii61805_c3_g27_i1_4]	19.8029	17.65	1	0	4	6	7.27528e+07	340	36.6024	6.72705
	A2	Sequence	# PSMs	# Proteins	# Protein Groups	Protein Group Accessions	Modifications	ΔCn	Area	XCorr	Charge	MH+ [Da]	ΔM [ppm]	RT [min]	# Missed Cleavages
	High	AGYAAGVAcDSGTNNAEcK	2	34	34	unk	C9(Carbamidomethyl); C18(Carbamidomethyl)	0	2.86083e+07	4.10071	2	1915.8	2.20499	23.8671	0
	High	TcQDGSSTAHQVIK	1	34	34	unk	C2(Carbamidomethyl)	0	5.35694e+07	3.61331	3	1531.72	1.47326	19.7507	0
	High	VYRDIVNAVSTK	2	34	34	unk		0	9.44251e+07	3.40518	3	1364.75	0.430896	29.266	1
	High	cTIEPAYTSGDAFTK	1	34	34	unk	C1(Carbamidomethyl)	0	70263842	2.58973	2	1660.75	0.876998	32.5119	0
unk	len=1034 - [Mii61805_c3_g29_i1_5]	19.8029	17.44	1	0	4	6	7.27528e+07	344	37.1817	7.41553
	A2	Sequence	# PSMs	# Proteins	# Protein Groups	Protein Group Accessions	Modifications	ΔCn	Area	XCorr	Charge	MH+ [Da]	ΔM [ppm]	RT [min]	# Missed Cleavages
	High	AGYAAGVAcDSGTNNAEcK	2	34	34	unk	C9(Carbamidomethyl); C18(Carbamidomethyl)	0	2.86083e+07	4.10071	2	1915.8	2.20499	23.8671	0
	High	TcQDGSSTAHQVIK	1	34	34	unk	C2(Carbamidomethyl)	0	5.35694e+07	3.61331	3	1531.72	1.47326	19.7507	0
	High	VYRDIVNAVSTK	2	34	34	unk		0	9.44251e+07	3.40518	3	1364.75	0.430896	29.266	1
	High	cTIEPAYTSGDAFTK	1	34	34	unk	C1(Carbamidomethyl)	0	70263842	2.58973	2	1660.75	0.876998	32.5119	0
unk	len=1021 - [Mii61805_c3_g31_i1_4]	19.8029	17.65	1	0	4	6	7.27528e+07	340	36.7285	6.96143
	A2	Sequence	# PSMs	# Proteins	# Protein Groups	Protein Group Accessions	Modifications	ΔCn	Area	XCorr	Charge	MH+ [Da]	ΔM [ppm]	RT [min]	# Missed Cleavages
	High	AGYAAGVAcDSGTNNAEcK	2	34	34	unk	C9(Carbamidomethyl); C18(Carbamidomethyl)	0	2.86083e+07	4.10071	2	1915.8	2.20499	23.8671	0
	High	TcQDGSSTAHQVIK	1	34	34	unk	C2(Carbamidomethyl)	0	5.35694e+07	3.61331	3	1531.72	1.47326	19.7507	0
	High	VYRDIVNAVSTK	2	34	34	unk		0	9.44251e+07	3.40518	3	1364.75	0.430896	29.266	1
	High	cTIEPAYTSGDAFTK	1	34	34	unk	C1(Carbamidomethyl)	0	70263842	2.58973	2	1660.75	0.876998	32.5119	0
unk	len=1034 - [Mii61805_c3_g32_i1_5]	19.8029	17.44	1	0	4	6	7.27528e+07	344	37.2097	7.41553
	A2	Sequence	# PSMs	# Proteins	# Protein Groups	Protein Group Accessions	Modifications	ΔCn	Area	XCorr	Charge	MH+ [Da]	ΔM [ppm]	RT [min]	# Missed Cleavages
	High	AGYAAGVAcDSGTNNAEcK	2	34	34	unk	C9(Carbamidomethyl); C18(Carbamidomethyl)	0	2.86083e+07	4.10071	2	1915.8	2.20499	23.8671	0
	High	TcQDGSSTAHQVIK	1	34	34	unk	C2(Carbamidomethyl)	0	5.35694e+07	3.61331	3	1531.72	1.47326	19.7507	0
	High	VYRDIVNAVSTK	2	34	34	unk		0	9.44251e+07	3.40518	3	1364.75	0.430896	29.266	1
	High	cTIEPAYTSGDAFTK	1	34	34	unk	C1(Carbamidomethyl)	0	70263842	2.58973	2	1660.75	0.876998	32.5119	0
unk	len=1024 - [Mii61805_c3_g33_i1_4]	19.8029	17.6	1	0	4	6	7.27528e+07	341	36.8105	6.96143
	A2	Sequence	# PSMs	# Proteins	# Protein Groups	Protein Group Accessions	Modifications	ΔCn	Area	XCorr	Charge	MH+ [Da]	ΔM [ppm]	RT [min]	# Missed Cleavages
	High	AGYAAGVAcDSGTNNAEcK	2	34	34	unk	C9(Carbamidomethyl); C18(Carbamidomethyl)	0	2.86083e+07	4.10071	2	1915.8	2.20499	23.8671	0
	High	TcQDGSSTAHQVIK	1	34	34	unk	C2(Carbamidomethyl)	0	5.35694e+07	3.61331	3	1531.72	1.47326	19.7507	0
	High	VYRDIVNAVSTK	2	34	34	unk		0	9.44251e+07	3.40518	3	1364.75	0.430896	29.266	1
	High	cTIEPAYTSGDAFTK	1	34	34	unk	C1(Carbamidomethyl)	0	70263842	2.58973	2	1660.75	0.876998	32.5119	0
unk	len=1039 - [Mii61805_c3_g36_i1_4]	19.8029	17.34	1	0	4	6	7.27528e+07	346	37.4388	7.1958
	A2	Sequence	# PSMs	# Proteins	# Protein Groups	Protein Group Accessions	Modifications	ΔCn	Area	XCorr	Charge	MH+ [Da]	ΔM [ppm]	RT [min]	# Missed Cleavages
	High	AGYAAGVAcDSGTNNAEcK	2	34	34	unk	C9(Carbamidomethyl); C18(Carbamidomethyl)	0	2.86083e+07	4.10071	2	1915.8	2.20499	23.8671	0
	High	TcQDGSSTAHQVIK	1	34	34	unk	C2(Carbamidomethyl)	0	5.35694e+07	3.61331	3	1531.72	1.47326	19.7507	0
	High	VYRDIVNAVSTK	2	34	34	unk		0	9.44251e+07	3.40518	3	1364.75	0.430896	29.266	1
	High	cTIEPAYTSGDAFTK	1	34	34	unk	C1(Carbamidomethyl)	0	70263842	2.58973	2	1660.75	0.876998	32.5119	0
unk	len=1039 - [Mii61805_c3_g37_i1_4]	19.8029	17.34	1	0	4	6	7.27528e+07	346	37.4668	7.1958
	A2	Sequence	# PSMs	# Proteins	# Protein Groups	Protein Group Accessions	Modifications	ΔCn	Area	XCorr	Charge	MH+ [Da]	ΔM [ppm]	RT [min]	# Missed Cleavages
	High	AGYAAGVAcDSGTNNAEcK	2	34	34	unk	C9(Carbamidomethyl); C18(Carbamidomethyl)	0	2.86083e+07	4.10071	2	1915.8	2.20499	23.8671	0
	High	TcQDGSSTAHQVIK	1	34	34	unk	C2(Carbamidomethyl)	0	5.35694e+07	3.61331	3	1531.72	1.47326	19.7507	0
	High	VYRDIVNAVSTK	2	34	34	unk		0	9.44251e+07	3.40518	3	1364.75	0.430896	29.266	1
	High	cTIEPAYTSGDAFTK	1	34	34	unk	C1(Carbamidomethyl)	0	70263842	2.58973	2	1660.75	0.876998	32.5119	0
unk	len=1034 - [Mii61805_c3_g38_i1_5]	19.8029	17.44	1	0	4	6	7.27528e+07	344	37.1827	7.41553
	A2	Sequence	# PSMs	# Proteins	# Protein Groups	Protein Group Accessions	Modifications	ΔCn	Area	XCorr	Charge	MH+ [Da]	ΔM [ppm]	RT [min]	# Missed Cleavages
	High	AGYAAGVAcDSGTNNAEcK	2	34	34	unk	C9(Carbamidomethyl); C18(Carbamidomethyl)	0	2.86083e+07	4.10071	2	1915.8	2.20499	23.8671	0
	High	TcQDGSSTAHQVIK	1	34	34	unk	C2(Carbamidomethyl)	0	5.35694e+07	3.61331	3	1531.72	1.47326	19.7507	0
	High	VYRDIVNAVSTK	2	34	34	unk		0	9.44251e+07	3.40518	3	1364.75	0.430896	29.266	1
	High	cTIEPAYTSGDAFTK	1	34	34	unk	C1(Carbamidomethyl)	0	70263842	2.58973	2	1660.75	0.876998	32.5119	0
unk	len=1024 - [Mii61805_c3_g39_i1_4]	19.8029	17.6	1	0	4	6	7.27528e+07	341	36.8406	7.1958
	A2	Sequence	# PSMs	# Proteins	# Protein Groups	Protein Group Accessions	Modifications	ΔCn	Area	XCorr	Charge	MH+ [Da]	ΔM [ppm]	RT [min]	# Missed Cleavages
	High	AGYAAGVAcDSGTNNAEcK	2	34	34	unk	C9(Carbamidomethyl); C18(Carbamidomethyl)	0	2.86083e+07	4.10071	2	1915.8	2.20499	23.8671	0
	High	TcQDGSSTAHQVIK	1	34	34	unk	C2(Carbamidomethyl)	0	5.35694e+07	3.61331	3	1531.72	1.47326	19.7507	0
	High	VYRDIVNAVSTK	2	34	34	unk		0	9.44251e+07	3.40518	3	1364.75	0.430896	29.266	1
	High	cTIEPAYTSGDAFTK	1	34	34	unk	C1(Carbamidomethyl)	0	70263842	2.58973	2	1660.75	0.876998	32.5119	0
unk	len=1024 - [Mii61805_c3_g45_i1_4]	19.8029	17.6	1	0	4	6	7.27528e+07	341	36.8236	7.1958
	A2	Sequence	# PSMs	# Proteins	# Protein Groups	Protein Group Accessions	Modifications	ΔCn	Area	XCorr	Charge	MH+ [Da]	ΔM [ppm]	RT [min]	# Missed Cleavages
	High	AGYAAGVAcDSGTNNAEcK	2	34	34	unk	C9(Carbamidomethyl); C18(Carbamidomethyl)	0	2.86083e+07	4.10071	2	1915.8	2.20499	23.8671	0
	High	TcQDGSSTAHQVIK	1	34	34	unk	C2(Carbamidomethyl)	0	5.35694e+07	3.61331	3	1531.72	1.47326	19.7507	0
	High	VYRDIVNAVSTK	2	34	34	unk		0	9.44251e+07	3.40518	3	1364.75	0.430896	29.266	1
	High	cTIEPAYTSGDAFTK	1	34	34	unk	C1(Carbamidomethyl)	0	70263842	2.58973	2	1660.75	0.876998	32.5119	0
unk	len=1034 - [Mii61805_c3_g46_i1_5]	19.8029	17.44	1	0	4	6	7.27528e+07	344	37.1797	7.41553
	A2	Sequence	# PSMs	# Proteins	# Protein Groups	Protein Group Accessions	Modifications	ΔCn	Area	XCorr	Charge	MH+ [Da]	ΔM [ppm]	RT [min]	# Missed Cleavages
	High	AGYAAGVAcDSGTNNAEcK	2	34	34	unk	C9(Carbamidomethyl); C18(Carbamidomethyl)	0	2.86083e+07	4.10071	2	1915.8	2.20499	23.8671	0
	High	TcQDGSSTAHQVIK	1	34	34	unk	C2(Carbamidomethyl)	0	5.35694e+07	3.61331	3	1531.72	1.47326	19.7507	0
	High	VYRDIVNAVSTK	2	34	34	unk		0	9.44251e+07	3.40518	3	1364.75	0.430896	29.266	1
	High	cTIEPAYTSGDAFTK	1	34	34	unk	C1(Carbamidomethyl)	0	70263842	2.58973	2	1660.75	0.876998	32.5119	0
unk	len=913 - [Mii65436_c1_g1_i1_2]	19.8029	19.74	1	0	4	6	7.27528e+07	304	32.3014	7.1958
	A2	Sequence	# PSMs	# Proteins	# Protein Groups	Protein Group Accessions	Modifications	ΔCn	Area	XCorr	Charge	MH+ [Da]	ΔM [ppm]	RT [min]	# Missed Cleavages
	High	AGYAAGVAcDSGTNNAEcK	2	34	34	unk	C9(Carbamidomethyl); C18(Carbamidomethyl)	0	2.86083e+07	4.10071	2	1915.8	2.20499	23.8671	0
	High	TcQDGSSTAHQVIK	1	34	34	unk	C2(Carbamidomethyl)	0	5.35694e+07	3.61331	3	1531.72	1.47326	19.7507	0
	High	VYRDIVNAVSTK	2	34	34	unk		0	9.44251e+07	3.40518	3	1364.75	0.430896	29.266	1
	High	cTIEPAYTSGDAFTK	1	34	34	unk	C1(Carbamidomethyl)	0	70263842	2.58973	2	1660.75	0.876998	32.5119	0
unk	len=309 - [Mii66946_c0_g2_i1_5]	16.0914	19.61	1	0	3	5	1.50295e+08	102	10.7264	4.61475
	A2	Sequence	# PSMs	# Proteins	# Protein Groups	Protein Group Accessions	Modifications	ΔCn	Area	XCorr	Charge	MH+ [Da]	ΔM [ppm]	RT [min]	# Missed Cleavages
	High	TDLIPKDNVDISFPNNPERK	3	2	2	unk		0	194353855	3.52513	3	2312.19	1.44935	35.7124	2
	High	TDLIPKDNVDISFPNNPER	1	2	2	unk		0	1.61239e+08	3.44695	3	2184.1	1.47814	37.53	1
	High	DNVDISFPNNPER	1	4	4	unk		0	9.52933e+07	2.76246	2	1516.71	3.18837	33.8393	0
unk	len=229 - [Mii66946_c0_g2_i2_5]	16.0914	26.32	1	0	3	5	1.50295e+08	76	8.40621	4.61475
	A2	Sequence	# PSMs	# Proteins	# Protein Groups	Protein Group Accessions	Modifications	ΔCn	Area	XCorr	Charge	MH+ [Da]	ΔM [ppm]	RT [min]	# Missed Cleavages
	High	TDLIPKDNVDISFPNNPERK	3	2	2	unk		0	194353855	3.52513	3	2312.19	1.44935	35.7124	2
	High	TDLIPKDNVDISFPNNPER	1	2	2	unk		0	1.61239e+08	3.44695	3	2184.1	1.47814	37.53	1
	High	DNVDISFPNNPER	1	4	4	unk		0	9.52933e+07	2.76246	2	1516.71	3.18837	33.8393	0
unk	len=4125 - [Mii70735_c0_g1_i1_4]	7.57698	2.84	1	0	2	2	6.11533e+07	1375	151.59	5.08447
	A2	Sequence	# PSMs	# Proteins	# Protein Groups	Protein Group Accessions	Modifications	ΔCn	Area	XCorr	Charge	MH+ [Da]	ΔM [ppm]	RT [min]	# Missed Cleavages
	High	LSQDPSQQLTASSHScR	1	3	3	unk	C16(Carbamidomethyl)	0	7.35223e+07	4.35257	3	1901.88	2.52108	24.3242	0
	High	TVKNPASFGGRPcTDQNVQSER	1	2	2	unk	C13(Carbamidomethyl)	0	4.87844e+07	3.22441	4	2448.17	1.8132	24.387	1
unk	len=4074 - [Mii73053_c0_g1_i1_3]	7.57698	2.87	1	0	2	2	6.11533e+07	1357	149.329	5.0083
	A2	Sequence	# PSMs	# Proteins	# Protein Groups	Protein Group Accessions	Modifications	ΔCn	Area	XCorr	Charge	MH+ [Da]	ΔM [ppm]	RT [min]	# Missed Cleavages
	High	LSQDPSQQLTASSHScR	1	3	3	unk	C16(Carbamidomethyl)	0	7.35223e+07	4.35257	3	1901.88	2.52108	24.3242	0
	High	TVKNPASFGGRPcTDQNVQSER	1	2	2	unk	C13(Carbamidomethyl)	0	4.87844e+07	3.22441	4	2448.17	1.8132	24.387	1
unk	len=657 - [Mii70376_c0_g1_i1_2]	7.24195	9.13	1	0	2	2	1.62148e+08	219	23.3308	4.51318
	A2	Sequence	# PSMs	# Proteins	# Protein Groups	Protein Group Accessions	Modifications	ΔCn	Area	XCorr	Charge	MH+ [Da]	ΔM [ppm]	RT [min]	# Missed Cleavages
	High	TDLIPKDNIDISFPNNPER	1	2	2	unk		0	1.29911e+08	3.75629	3	2198.11	2.54025	39.0857	1
	High	TDLIPKDNIDISFPNNPERK	1	2	2	unk		0	194384633	3.48566	4	2326.21	1.94885	37.0585	2
unk	len=650 - [Mii70376_c0_g1_i2_1]	7.24195	9.22	1	0	2	2	1.62148e+08	217	23.1206	4.4624
	A2	Sequence	# PSMs	# Proteins	# Protein Groups	Protein Group Accessions	Modifications	ΔCn	Area	XCorr	Charge	MH+ [Da]	ΔM [ppm]	RT [min]	# Missed Cleavages
	High	TDLIPKDNIDISFPNNPER	1	2	2	unk		0	1.29911e+08	3.75629	3	2198.11	2.54025	39.0857	1
	High	TDLIPKDNIDISFPNNPERK	1	2	2	unk		0	194384633	3.48566	4	2326.21	1.94885	37.0585	2
unk	len=2508 - [Mii78791_c0_g1_i1_1]	5.6745	4.07	1	0	2	2	1.37501e+07	836	94.4816	6.771
	A2	Sequence	# PSMs	# Proteins	# Protein Groups	Protein Group Accessions	Modifications	ΔCn	Area	XCorr	Charge	MH+ [Da]	ΔM [ppm]	RT [min]	# Missed Cleavages
	High	SGQPDNAGRNEHcAGLNWGTR	1	4	4	unk	C13(Carbamidomethyl)	0	1.26757e+07	3.09087	4	2297.03	2.99707	26.4	1
	High	SDIAVIcEAESSK	1	4	4	unk	C7(Carbamidomethyl)	0	1.48246e+07	2.58363	2	1408.67	2.0058	32.4074	0
unk	len=2593 - [Mii78791_c0_g1_i6_1]	5.6745	3.94	1	0	2	2	1.37501e+07	864	98.2252	7.35693
	A2	Sequence	# PSMs	# Proteins	# Protein Groups	Protein Group Accessions	Modifications	ΔCn	Area	XCorr	Charge	MH+ [Da]	ΔM [ppm]	RT [min]	# Missed Cleavages
	High	SGQPDNAGRNEHcAGLNWGTR	1	4	4	unk	C13(Carbamidomethyl)	0	1.26757e+07	3.09087	4	2297.03	2.99707	26.4	1
	High	SDIAVIcEAESSK	1	4	4	unk	C7(Carbamidomethyl)	0	1.48246e+07	2.58363	2	1408.67	2.0058	32.4074	0
unk	len=1315 - [Mii73053_c0_g1_i3_1]	4.35257	3.88	1	0	1	1	7.35223e+07	438	48.2609	5.13525
	A2	Sequence	# PSMs	# Proteins	# Protein Groups	Protein Group Accessions	Modifications	ΔCn	Area	XCorr	Charge	MH+ [Da]	ΔM [ppm]	RT [min]	# Missed Cleavages
	High	LSQDPSQQLTASSHScR	1	3	3	unk	C16(Carbamidomethyl)	0	7.35223e+07	4.35257	3	1901.88	2.52108	24.3242	0
unk	len=2631 - [Mii78135_c0_g1_i3_3]	3.52606	4.68	1	1	1	1		876	97.7382	5.08447
	A2	Sequence	# PSMs	# Proteins	# Protein Groups	Protein Group Accessions	Modifications	ΔCn	Area	XCorr	Charge	MH+ [Da]	ΔM [ppm]	RT [min]	# Missed Cleavages
	High	NERPSxTSGFNHQEVVVDRLSNDDIcYNAcIExRYmIYIDR	1	1	1	unk	X6(L); C26(Carbamidomethyl); C30(Carbamidomethyl); X33(L); M36(Oxidation)	0	0	3.52606	4	4991.35	0.314051	42.8471	2
unk	len=2663 - [Mii74473_c0_g1_i1_6]	3.09087	2.37	1	0	1	1	1.26757e+07	887	100.435	7.1958
	A2	Sequence	# PSMs	# Proteins	# Protein Groups	Protein Group Accessions	Modifications	ΔCn	Area	XCorr	Charge	MH+ [Da]	ΔM [ppm]	RT [min]	# Missed Cleavages
	High	SGQPDNAGRNEHcAGLNWGTR	1	4	4	unk	C13(Carbamidomethyl)	0	1.26757e+07	3.09087	4	2297.03	2.99707	26.4	1
unk	len=2171 - [Mii78791_c0_g1_i7_1]	3.09087	2.9	1	0	1	1	1.26757e+07	724	81.5449	7.32764
	A2	Sequence	# PSMs	# Proteins	# Protein Groups	Protein Group Accessions	Modifications	ΔCn	Area	XCorr	Charge	MH+ [Da]	ΔM [ppm]	RT [min]	# Missed Cleavages
	High	SGQPDNAGRNEHcAGLNWGTR	1	4	4	unk	C13(Carbamidomethyl)	0	1.26757e+07	3.09087	4	2297.03	2.99707	26.4	1
unk	len=5634 - [Mii78830_c0_g1_i1_3]	3.07596	2.29	1	0	1	1	10183630360	1877	216.138	8.23584
	A2	Sequence	# PSMs	# Proteins	# Protein Groups	Protein Group Accessions	Modifications	ΔCn	Area	XCorr	Charge	MH+ [Da]	ΔM [ppm]	RT [min]	# Missed Cleavages
	High	QGPALSYLcLLEFADSDWTVAAcWDLIxCWGRCFxQxADQNGR	1	2	2	unk	C9(Carbamidomethyl); C23(Carbamidomethyl); X28(L); X35(L); X37(L)	0	10183630360	3.07596	4	4975.34	-0.726198	41.9555	1
unk	len=3749 - [Mii78830_c0_g1_i4_1]	3.07596	3.44	1	0	1	1	10183630360	1249	143.38	8.42627
	A2	Sequence	# PSMs	# Proteins	# Protein Groups	Protein Group Accessions	Modifications	ΔCn	Area	XCorr	Charge	MH+ [Da]	ΔM [ppm]	RT [min]	# Missed Cleavages
	High	QGPALSYLcLLEFADSDWTVAAcWDLIxCWGRCFxQxADQNGR	1	2	2	unk	C9(Carbamidomethyl); C23(Carbamidomethyl); X28(L); X35(L); X37(L)	0	10183630360	3.07596	4	4975.34	-0.726198	41.9555	1
unk	len=722 - [Mii59191_c0_g1_i1_4]	2.76246	5.42	1	0	1	1	9.52933e+07	240	27.4797	8.35303
	A2	Sequence	# PSMs	# Proteins	# Protein Groups	Protein Group Accessions	Modifications	ΔCn	Area	XCorr	Charge	MH+ [Da]	ΔM [ppm]	RT [min]	# Missed Cleavages
	High	DNVDISFPNNPER	1	4	4	unk		0	9.52933e+07	2.76246	2	1516.71	3.18837	33.8393	0
unk	len=804 - [Mii59191_c0_g2_i1_4]	2.76246	4.85	1	0	1	1	9.52933e+07	268	31.3165	8.67529
	A2	Sequence	# PSMs	# Proteins	# Protein Groups	Protein Group Accessions	Modifications	ΔCn	Area	XCorr	Charge	MH+ [Da]	ΔM [ppm]	RT [min]	# Missed Cleavages
	High	DNVDISFPNNPER	1	4	4	unk		0	9.52933e+07	2.76246	2	1516.71	3.18837	33.8393	0
unk	len=1085 - [Mii78791_c0_g1_i4_1]	2.58363	3.59	1	0	1	1	1.48246e+07	362	40.3865	6.44287
	A2	Sequence	# PSMs	# Proteins	# Protein Groups	Protein Group Accessions	Modifications	ΔCn	Area	XCorr	Charge	MH+ [Da]	ΔM [ppm]	RT [min]	# Missed Cleavages
	High	SDIAVIcEAESSK	1	4	4	unk	C7(Carbamidomethyl)	0	1.48246e+07	2.58363	2	1408.67	2.0058	32.4074	0
unk	len=2197 - [Mii78791_c0_g1_i5_1]	2.58363	1.78	1	0	1	1	1.48246e+07	732	82.7298	6.94678
	A2	Sequence	# PSMs	# Proteins	# Protein Groups	Protein Group Accessions	Modifications	ΔCn	Area	XCorr	Charge	MH+ [Da]	ΔM [ppm]	RT [min]	# Missed Cleavages
	High	SDIAVIcEAESSK	1	4	4	unk	C7(Carbamidomethyl)	0	1.48246e+07	2.58363	2	1408.67	2.0058	32.4074	0
unk	len=604 - [Mii58905_c0_g2_i1_1]	2.57745	6.47	1	0	1	1	3.24066e+07	201	22.2777	5.2876
	A2	Sequence	# PSMs	# Proteins	# Protein Groups	Protein Group Accessions	Modifications	ΔCn	Area	XCorr	Charge	MH+ [Da]	ΔM [ppm]	RT [min]	# Missed Cleavages
	High	TIcVDVNEcELGR	1	3	3	unk	C3(Carbamidomethyl); C9(Carbamidomethyl)	0	3.24066e+07	2.57745	2	1564.71	-0.285885	33.388	0
unk	len=550 - [Mii58905_c0_g2_i3_1]	2.57745	7.1	1	0	1	1	3.24066e+07	183	20.1247	4.88135
	A2	Sequence	# PSMs	# Proteins	# Protein Groups	Protein Group Accessions	Modifications	ΔCn	Area	XCorr	Charge	MH+ [Da]	ΔM [ppm]	RT [min]	# Missed Cleavages
	High	TIcVDVNEcELGR	1	3	3	unk	C3(Carbamidomethyl); C9(Carbamidomethyl)	0	3.24066e+07	2.57745	2	1564.71	-0.285885	33.388	0
unk	len=2022 - [Mii80234_c1_g1_i1_6]	2.57745	1.93	1	0	1	1	3.24066e+07	674	73.508	5.13525
	A2	Sequence	# PSMs	# Proteins	# Protein Groups	Protein Group Accessions	Modifications	ΔCn	Area	XCorr	Charge	MH+ [Da]	ΔM [ppm]	RT [min]	# Missed Cleavages
	High	TIcVDVNEcELGR	1	3	3	unk	C3(Carbamidomethyl); C9(Carbamidomethyl)	0	3.24066e+07	2.57745	2	1564.71	-0.285885	33.388	0
unk	len=2379 - [Mii71524_c0_g1_i1_1]	2.46389	1.39	1	1	1	1	8.3059e+07	793	89.5334	9.70068
	A2	Sequence	# PSMs	# Proteins	# Protein Groups	Protein Group Accessions	Modifications	ΔCn	Area	XCorr	Charge	MH+ [Da]	ΔM [ppm]	RT [min]	# Missed Cleavages
	High	NKSIEIDTNIR	1	1	1	unk		0	8.3059e+07	2.46389	2	1302.7	2.59164	27.4667	1

## Sheet: tail amputated animals 4
Protein FDR Confidence	Accession	Description	FASTA Title Lines	Exp. q-value	Sum PEP Score	Coverage	# Peptides	# PSMs	# Unique Peptides	# Protein Groups	# AAs	MW [kDa]	calc. pI	Area: F2: Sample	emPAI	Score Sequest HT	# Peptides Sequest HT
	unk	len=1034	>gnl|unk|Mii61805_c3_g24_i1_5 len=1034		2,455	8	2	4	2	1	344	37,2	7,20	4.90146e+07	0,245	9,26	2
	Confidence	Sequence	Modifications	Qvality PEP	Qvality q-value	# Protein Groups	# Proteins	# PSMs	Master Protein Accessions	# Missed Cleavages	Theo. MH+ [Da]	Area: F2: Sample	XCorr Sequest HT	Confidence Sequest HT	Percolator q-Value Sequest HT	Percolator PEP Sequest HT
	High	TCQDGSSTAHQVIK	1xCarbamidomethyl [C2]	0,103272	0	1	34	2	unk	0	1531,71693	4.94822e+07	2,57	High	0	0,0526
	High	CTIEPAYTSGDAFTK	1xCarbamidomethyl [C1]	0,122085	0	1	34	2	unk	0	1660,75231	4.85469e+07	2,47	High	0	0,06672
	unk	len=1015	>gnl|unk|Mii61805_c3_g13_i1_4 len=1015		2,455	8	2	4	2	1	338	36,5	6,96	4.90146e+07	0,259	9,26	2
	Confidence	Sequence	Modifications	Qvality PEP	Qvality q-value	# Protein Groups	# Proteins	# PSMs	Master Protein Accessions	# Missed Cleavages	Theo. MH+ [Da]	Area: F2: Sample	XCorr Sequest HT	Confidence Sequest HT	Percolator q-Value Sequest HT	Percolator PEP Sequest HT
	High	TCQDGSSTAHQVIK	1xCarbamidomethyl [C2]	0,103272	0	1	34	2	unk	0	1531,71693	4.94822e+07	2,57	High	0	0,0526
	High	CTIEPAYTSGDAFTK	1xCarbamidomethyl [C1]	0,122085	0	1	34	2	unk	0	1660,75231	4.85469e+07	2,47	High	0	0,06672
	unk	len=1024	>gnl|unk|Mii61805_c3_g39_i1_4 len=1024		2,455	8	2	4	2	1	341	36,8	7,20	4.90146e+07	0,245	9,26	2
	Confidence	Sequence	Modifications	Qvality PEP	Qvality q-value	# Protein Groups	# Proteins	# PSMs	Master Protein Accessions	# Missed Cleavages	Theo. MH+ [Da]	Area: F2: Sample	XCorr Sequest HT	Confidence Sequest HT	Percolator q-Value Sequest HT	Percolator PEP Sequest HT
	High	TCQDGSSTAHQVIK	1xCarbamidomethyl [C2]	0,103272	0	1	34	2	unk	0	1531,71693	4.94822e+07	2,57	High	0	0,0526
	High	CTIEPAYTSGDAFTK	1xCarbamidomethyl [C1]	0,122085	0	1	34	2	unk	0	1660,75231	4.85469e+07	2,47	High	0	0,06672
	unk	len=1034	>gnl|unk|Mii61805_c3_g29_i1_5 len=1034; >gnl|unk|Mii61805_c3_g44_i1_5 len=1034		2,455	8	2	4	2	1	344	37,2	7,42	4.90146e+07	0,245	9,26	2
	Confidence	Sequence	Modifications	Qvality PEP	Qvality q-value	# Protein Groups	# Proteins	# PSMs	Master Protein Accessions	# Missed Cleavages	Theo. MH+ [Da]	Area: F2: Sample	XCorr Sequest HT	Confidence Sequest HT	Percolator q-Value Sequest HT	Percolator PEP Sequest HT
	High	TCQDGSSTAHQVIK	1xCarbamidomethyl [C2]	0,103272	0	1	34	2	unk	0	1531,71693	4.94822e+07	2,57	High	0	0,0526
	High	CTIEPAYTSGDAFTK	1xCarbamidomethyl [C1]	0,122085	0	1	34	2	unk	0	1660,75231	4.85469e+07	2,47	High	0	0,06672
	unk	len=1034	>gnl|unk|Mii61805_c3_g1_i1_5 len=1034; >gnl|unk|Mii61805_c3_g30_i1_5 len=1034		2,455	8	2	4	2	1	344	37,2	7,42	4.90146e+07	0,245	9,26	2
	Confidence	Sequence	Modifications	Qvality PEP	Qvality q-value	# Protein Groups	# Proteins	# PSMs	Master Protein Accessions	# Missed Cleavages	Theo. MH+ [Da]	Area: F2: Sample	XCorr Sequest HT	Confidence Sequest HT	Percolator q-Value Sequest HT	Percolator PEP Sequest HT
	High	TCQDGSSTAHQVIK	1xCarbamidomethyl [C2]	0,103272	0	1	34	2	unk	0	1531,71693	4.94822e+07	2,57	High	0	0,0526
	High	CTIEPAYTSGDAFTK	1xCarbamidomethyl [C1]	0,122085	0	1	34	2	unk	0	1660,75231	4.85469e+07	2,47	High	0	0,06672
	unk	len=1021	>gnl|unk|Mii61805_c3_g27_i1_4 len=1021		2,455	8	2	4	2	1	340	36,6	6,73	4.90146e+07	0,259	9,26	2
	Confidence	Sequence	Modifications	Qvality PEP	Qvality q-value	# Protein Groups	# Proteins	# PSMs	Master Protein Accessions	# Missed Cleavages	Theo. MH+ [Da]	Area: F2: Sample	XCorr Sequest HT	Confidence Sequest HT	Percolator q-Value Sequest HT	Percolator PEP Sequest HT
	High	TCQDGSSTAHQVIK	1xCarbamidomethyl [C2]	0,103272	0	1	34	2	unk	0	1531,71693	4.94822e+07	2,57	High	0	0,0526
	High	CTIEPAYTSGDAFTK	1xCarbamidomethyl [C1]	0,122085	0	1	34	2	unk	0	1660,75231	4.85469e+07	2,47	High	0	0,06672
	unk	len=1024	>gnl|unk|Mii61805_c3_g18_i1_4 len=1024; >gnl|unk|Mii61805_c3_g5_i1_4 len=1024		2,455	8	2	4	2	1	341	36,8	7,20	4.90146e+07	0,245	9,26	2
	Confidence	Sequence	Modifications	Qvality PEP	Qvality q-value	# Protein Groups	# Proteins	# PSMs	Master Protein Accessions	# Missed Cleavages	Theo. MH+ [Da]	Area: F2: Sample	XCorr Sequest HT	Confidence Sequest HT	Percolator q-Value Sequest HT	Percolator PEP Sequest HT
	High	TCQDGSSTAHQVIK	1xCarbamidomethyl [C2]	0,103272	0	1	34	2	unk	0	1531,71693	4.94822e+07	2,57	High	0	0,0526
	High	CTIEPAYTSGDAFTK	1xCarbamidomethyl [C1]	0,122085	0	1	34	2	unk	0	1660,75231	4.85469e+07	2,47	High	0	0,06672
	unk	len=1024	>gnl|unk|Mii61805_c3_g42_i1_4 len=1024; >gnl|unk|Mii61805_c3_g10_i1_4 len=1024		2,455	8	2	4	2	1	341	36,8	6,96	4.90146e+07	0,245	9,26	2
	Confidence	Sequence	Modifications	Qvality PEP	Qvality q-value	# Protein Groups	# Proteins	# PSMs	Master Protein Accessions	# Missed Cleavages	Theo. MH+ [Da]	Area: F2: Sample	XCorr Sequest HT	Confidence Sequest HT	Percolator q-Value Sequest HT	Percolator PEP Sequest HT
	High	TCQDGSSTAHQVIK	1xCarbamidomethyl [C2]	0,103272	0	1	34	2	unk	0	1531,71693	4.94822e+07	2,57	High	0	0,0526
	High	CTIEPAYTSGDAFTK	1xCarbamidomethyl [C1]	0,122085	0	1	34	2	unk	0	1660,75231	4.85469e+07	2,47	High	0	0,06672
	unk	len=1039	>gnl|unk|Mii61805_c3_g37_i1_4 len=1039		2,455	8	2	4	2	1	346	37,5	7,20	4.90146e+07	0,245	9,26	2
	Confidence	Sequence	Modifications	Qvality PEP	Qvality q-value	# Protein Groups	# Proteins	# PSMs	Master Protein Accessions	# Missed Cleavages	Theo. MH+ [Da]	Area: F2: Sample	XCorr Sequest HT	Confidence Sequest HT	Percolator q-Value Sequest HT	Percolator PEP Sequest HT
	High	TCQDGSSTAHQVIK	1xCarbamidomethyl [C2]	0,103272	0	1	34	2	unk	0	1531,71693	4.94822e+07	2,57	High	0	0,0526
	High	CTIEPAYTSGDAFTK	1xCarbamidomethyl [C1]	0,122085	0	1	34	2	unk	0	1660,75231	4.85469e+07	2,47	High	0	0,06672
	unk	len=1021	>gnl|unk|Mii61805_c3_g9_i1_4 len=1021; >gnl|unk|Mii61805_c3_g15_i1_4 len=1021		2,455	8	2	4	2	1	340	36,6	6,73	4.90146e+07	0,259	9,26	2
	Confidence	Sequence	Modifications	Qvality PEP	Qvality q-value	# Protein Groups	# Proteins	# PSMs	Master Protein Accessions	# Missed Cleavages	Theo. MH+ [Da]	Area: F2: Sample	XCorr Sequest HT	Confidence Sequest HT	Percolator q-Value Sequest HT	Percolator PEP Sequest HT
	High	TCQDGSSTAHQVIK	1xCarbamidomethyl [C2]	0,103272	0	1	34	2	unk	0	1531,71693	4.94822e+07	2,57	High	0	0,0526
	High	CTIEPAYTSGDAFTK	1xCarbamidomethyl [C1]	0,122085	0	1	34	2	unk	0	1660,75231	4.85469e+07	2,47	High	0	0,06672
	unk	len=1021	>gnl|unk|Mii61805_c3_g31_i1_4 len=1021		2,455	8	2	4	2	1	340	36,7	6,96	4.90146e+07	0,245	9,26	2
	Confidence	Sequence	Modifications	Qvality PEP	Qvality q-value	# Protein Groups	# Proteins	# PSMs	Master Protein Accessions	# Missed Cleavages	Theo. MH+ [Da]	Area: F2: Sample	XCorr Sequest HT	Confidence Sequest HT	Percolator q-Value Sequest HT	Percolator PEP Sequest HT
	High	TCQDGSSTAHQVIK	1xCarbamidomethyl [C2]	0,103272	0	1	34	2	unk	0	1531,71693	4.94822e+07	2,57	High	0	0,0526
	High	CTIEPAYTSGDAFTK	1xCarbamidomethyl [C1]	0,122085	0	1	34	2	unk	0	1660,75231	4.85469e+07	2,47	High	0	0,06672
	unk	len=1021	>gnl|unk|Mii61805_c3_g22_i1_4 len=1021; >gnl|unk|Mii61805_c3_g26_i1_4 len=1021		2,455	8	2	4	2	1	340	36,7	6,96	4.90146e+07	0,245	9,26	2
	Confidence	Sequence	Modifications	Qvality PEP	Qvality q-value	# Protein Groups	# Proteins	# PSMs	Master Protein Accessions	# Missed Cleavages	Theo. MH+ [Da]	Area: F2: Sample	XCorr Sequest HT	Confidence Sequest HT	Percolator q-Value Sequest HT	Percolator PEP Sequest HT
	High	TCQDGSSTAHQVIK	1xCarbamidomethyl [C2]	0,103272	0	1	34	2	unk	0	1531,71693	4.94822e+07	2,57	High	0	0,0526
	High	CTIEPAYTSGDAFTK	1xCarbamidomethyl [C1]	0,122085	0	1	34	2	unk	0	1660,75231	4.85469e+07	2,47	High	0	0,06672
	unk	len=1034	>gnl|unk|Mii61805_c3_g32_i1_5 len=1034		2,455	8	2	4	2	1	344	37,2	7,42	4.90146e+07	0,245	9,26	2
	Confidence	Sequence	Modifications	Qvality PEP	Qvality q-value	# Protein Groups	# Proteins	# PSMs	Master Protein Accessions	# Missed Cleavages	Theo. MH+ [Da]	Area: F2: Sample	XCorr Sequest HT	Confidence Sequest HT	Percolator q-Value Sequest HT	Percolator PEP Sequest HT
	High	TCQDGSSTAHQVIK	1xCarbamidomethyl [C2]	0,103272	0	1	34	2	unk	0	1531,71693	4.94822e+07	2,57	High	0	0,0526
	High	CTIEPAYTSGDAFTK	1xCarbamidomethyl [C1]	0,122085	0	1	34	2	unk	0	1660,75231	4.85469e+07	2,47	High	0	0,06672
	unk	len=1021	>gnl|unk|Mii61805_c3_g16_i1_4 len=1021		2,455	8	2	4	2	1	340	36,6	6,73	4.90146e+07	0,259	9,26	2
	Confidence	Sequence	Modifications	Qvality PEP	Qvality q-value	# Protein Groups	# Proteins	# PSMs	Master Protein Accessions	# Missed Cleavages	Theo. MH+ [Da]	Area: F2: Sample	XCorr Sequest HT	Confidence Sequest HT	Percolator q-Value Sequest HT	Percolator PEP Sequest HT
	High	TCQDGSSTAHQVIK	1xCarbamidomethyl [C2]	0,103272	0	1	34	2	unk	0	1531,71693	4.94822e+07	2,57	High	0	0,0526
	High	CTIEPAYTSGDAFTK	1xCarbamidomethyl [C1]	0,122085	0	1	34	2	unk	0	1660,75231	4.85469e+07	2,47	High	0	0,06672
	unk	len=1034	>gnl|unk|Mii61805_c3_g38_i1_5 len=1034		2,455	8	2	4	2	1	344	37,2	7,42	4.90146e+07	0,245	9,26	2
	Confidence	Sequence	Modifications	Qvality PEP	Qvality q-value	# Protein Groups	# Proteins	# PSMs	Master Protein Accessions	# Missed Cleavages	Theo. MH+ [Da]	Area: F2: Sample	XCorr Sequest HT	Confidence Sequest HT	Percolator q-Value Sequest HT	Percolator PEP Sequest HT
	High	TCQDGSSTAHQVIK	1xCarbamidomethyl [C2]	0,103272	0	1	34	2	unk	0	1531,71693	4.94822e+07	2,57	High	0	0,0526
	High	CTIEPAYTSGDAFTK	1xCarbamidomethyl [C1]	0,122085	0	1	34	2	unk	0	1660,75231	4.85469e+07	2,47	High	0	0,06672
	unk	len=1039	>gnl|unk|Mii61805_c3_g36_i1_4 len=1039		2,455	8	2	4	2	1	346	37,4	7,20	4.90146e+07	0,245	9,26	2
	Confidence	Sequence	Modifications	Qvality PEP	Qvality q-value	# Protein Groups	# Proteins	# PSMs	Master Protein Accessions	# Missed Cleavages	Theo. MH+ [Da]	Area: F2: Sample	XCorr Sequest HT	Confidence Sequest HT	Percolator q-Value Sequest HT	Percolator PEP Sequest HT
	High	TCQDGSSTAHQVIK	1xCarbamidomethyl [C2]	0,103272	0	1	34	2	unk	0	1531,71693	4.94822e+07	2,57	High	0	0,0526
	High	CTIEPAYTSGDAFTK	1xCarbamidomethyl [C1]	0,122085	0	1	34	2	unk	0	1660,75231	4.85469e+07	2,47	High	0	0,06672
	unk	len=1021	>gnl|unk|Mii61805_c3_g19_i1_4 len=1021		2,455	8	2	4	2	1	340	36,6	6,96	4.90146e+07	0,259	9,26	2
	Confidence	Sequence	Modifications	Qvality PEP	Qvality q-value	# Protein Groups	# Proteins	# PSMs	Master Protein Accessions	# Missed Cleavages	Theo. MH+ [Da]	Area: F2: Sample	XCorr Sequest HT	Confidence Sequest HT	Percolator q-Value Sequest HT	Percolator PEP Sequest HT
	High	TCQDGSSTAHQVIK	1xCarbamidomethyl [C2]	0,103272	0	1	34	2	unk	0	1531,71693	4.94822e+07	2,57	High	0	0,0526
	High	CTIEPAYTSGDAFTK	1xCarbamidomethyl [C1]	0,122085	0	1	34	2	unk	0	1660,75231	4.85469e+07	2,47	High	0	0,06672
	unk	len=1001	>gnl|unk|Mii61805_c3_g3_i1_5 len=1001		2,455	8	2	4	2	1	333	35,8	6,96	4.90146e+07	0,259	9,26	2
	Confidence	Sequence	Modifications	Qvality PEP	Qvality q-value	# Protein Groups	# Proteins	# PSMs	Master Protein Accessions	# Missed Cleavages	Theo. MH+ [Da]	Area: F2: Sample	XCorr Sequest HT	Confidence Sequest HT	Percolator q-Value Sequest HT	Percolator PEP Sequest HT
	High	TCQDGSSTAHQVIK	1xCarbamidomethyl [C2]	0,103272	0	1	34	2	unk	0	1531,71693	4.94822e+07	2,57	High	0	0,0526
	High	CTIEPAYTSGDAFTK	1xCarbamidomethyl [C1]	0,122085	0	1	34	2	unk	0	1660,75231	4.85469e+07	2,47	High	0	0,06672
	unk	len=987	>gnl|unk|Mii61805_c3_g28_i1_6 len=987; >gnl|unk|Mii61805_c3_g23_i1_6 len=987		2,455	8	2	4	2	1	328	35,3	6,96	4.90146e+07	0,259	9,26	2
	Confidence	Sequence	Modifications	Qvality PEP	Qvality q-value	# Protein Groups	# Proteins	# PSMs	Master Protein Accessions	# Missed Cleavages	Theo. MH+ [Da]	Area: F2: Sample	XCorr Sequest HT	Confidence Sequest HT	Percolator q-Value Sequest HT	Percolator PEP Sequest HT
	High	TCQDGSSTAHQVIK	1xCarbamidomethyl [C2]	0,103272	0	1	34	2	unk	0	1531,71693	4.94822e+07	2,57	High	0	0,0526
	High	CTIEPAYTSGDAFTK	1xCarbamidomethyl [C1]	0,122085	0	1	34	2	unk	0	1660,75231	4.85469e+07	2,47	High	0	0,06672
	unk	len=1021	>gnl|unk|Mii61805_c3_g17_i1_4 len=1021		2,455	8	2	4	2	1	340	36,7	6,96	4.90146e+07	0,245	9,26	2
	Confidence	Sequence	Modifications	Qvality PEP	Qvality q-value	# Protein Groups	# Proteins	# PSMs	Master Protein Accessions	# Missed Cleavages	Theo. MH+ [Da]	Area: F2: Sample	XCorr Sequest HT	Confidence Sequest HT	Percolator q-Value Sequest HT	Percolator PEP Sequest HT
	High	TCQDGSSTAHQVIK	1xCarbamidomethyl [C2]	0,103272	0	1	34	2	unk	0	1531,71693	4.94822e+07	2,57	High	0	0,0526
	High	CTIEPAYTSGDAFTK	1xCarbamidomethyl [C1]	0,122085	0	1	34	2	unk	0	1660,75231	4.85469e+07	2,47	High	0	0,06672
	unk	len=1021	>gnl|unk|Mii61805_c3_g4_i1_4 len=1021		2,455	8	2	4	2	1	340	36,7	6,96	4.90146e+07	0,245	9,26	2
	Confidence	Sequence	Modifications	Qvality PEP	Qvality q-value	# Protein Groups	# Proteins	# PSMs	Master Protein Accessions	# Missed Cleavages	Theo. MH+ [Da]	Area: F2: Sample	XCorr Sequest HT	Confidence Sequest HT	Percolator q-Value Sequest HT	Percolator PEP Sequest HT
	High	TCQDGSSTAHQVIK	1xCarbamidomethyl [C2]	0,103272	0	1	34	2	unk	0	1531,71693	4.94822e+07	2,57	High	0	0,0526
	High	CTIEPAYTSGDAFTK	1xCarbamidomethyl [C1]	0,122085	0	1	34	2	unk	0	1660,75231	4.85469e+07	2,47	High	0	0,06672
	unk	len=1021	>gnl|unk|Mii61805_c3_g12_i1_4 len=1021; >gnl|unk|Mii61805_c3_g35_i1_4 len=1021		2,455	8	2	4	2	1	340	36,6	6,96	4.90146e+07	0,259	9,26	2
	Confidence	Sequence	Modifications	Qvality PEP	Qvality q-value	# Protein Groups	# Proteins	# PSMs	Master Protein Accessions	# Missed Cleavages	Theo. MH+ [Da]	Area: F2: Sample	XCorr Sequest HT	Confidence Sequest HT	Percolator q-Value Sequest HT	Percolator PEP Sequest HT
	High	TCQDGSSTAHQVIK	1xCarbamidomethyl [C2]	0,103272	0	1	34	2	unk	0	1531,71693	4.94822e+07	2,57	High	0	0,0526
	High	CTIEPAYTSGDAFTK	1xCarbamidomethyl [C1]	0,122085	0	1	34	2	unk	0	1660,75231	4.85469e+07	2,47	High	0	0,06672
	unk	len=1024	>gnl|unk|Mii61805_c3_g14_i1_4 len=1024		2,455	8	2	4	2	1	341	36,8	7,20	4.90146e+07	0,245	9,26	2
	Confidence	Sequence	Modifications	Qvality PEP	Qvality q-value	# Protein Groups	# Proteins	# PSMs	Master Protein Accessions	# Missed Cleavages	Theo. MH+ [Da]	Area: F2: Sample	XCorr Sequest HT	Confidence Sequest HT	Percolator q-Value Sequest HT	Percolator PEP Sequest HT
	High	TCQDGSSTAHQVIK	1xCarbamidomethyl [C2]	0,103272	0	1	34	2	unk	0	1531,71693	4.94822e+07	2,57	High	0	0,0526
	High	CTIEPAYTSGDAFTK	1xCarbamidomethyl [C1]	0,122085	0	1	34	2	unk	0	1660,75231	4.85469e+07	2,47	High	0	0,06672
	unk	len=1024	>gnl|unk|Mii61805_c3_g43_i1_4 len=1024; >gnl|unk|Mii61805_c3_g7_i1_4 len=1024		2,455	8	2	4	2	1	341	36,8	7,20	4.90146e+07	0,245	9,26	2
	Confidence	Sequence	Modifications	Qvality PEP	Qvality q-value	# Protein Groups	# Proteins	# PSMs	Master Protein Accessions	# Missed Cleavages	Theo. MH+ [Da]	Area: F2: Sample	XCorr Sequest HT	Confidence Sequest HT	Percolator q-Value Sequest HT	Percolator PEP Sequest HT
	High	TCQDGSSTAHQVIK	1xCarbamidomethyl [C2]	0,103272	0	1	34	2	unk	0	1531,71693	4.94822e+07	2,57	High	0	0,0526
	High	CTIEPAYTSGDAFTK	1xCarbamidomethyl [C1]	0,122085	0	1	34	2	unk	0	1660,75231	4.85469e+07	2,47	High	0	0,06672
	unk	len=913	>gnl|unk|Mii65436_c1_g1_i1_2 len=913		2,455	9	2	4	2	1	304	32,3	7,20	4.90146e+07	0,311	9,26	2
	Confidence	Sequence	Modifications	Qvality PEP	Qvality q-value	# Protein Groups	# Proteins	# PSMs	Master Protein Accessions	# Missed Cleavages	Theo. MH+ [Da]	Area: F2: Sample	XCorr Sequest HT	Confidence Sequest HT	Percolator q-Value Sequest HT	Percolator PEP Sequest HT
	High	TCQDGSSTAHQVIK	1xCarbamidomethyl [C2]	0,103272	0	1	34	2	unk	0	1531,71693	4.94822e+07	2,57	High	0	0,0526
	High	CTIEPAYTSGDAFTK	1xCarbamidomethyl [C1]	0,122085	0	1	34	2	unk	0	1660,75231	4.85469e+07	2,47	High	0	0,06672
	unk	len=1024	>gnl|unk|Mii61805_c3_g33_i1_4 len=1024		2,455	8	2	4	2	1	341	36,8	6,96	4.90146e+07	0,245	9,26	2
	Confidence	Sequence	Modifications	Qvality PEP	Qvality q-value	# Protein Groups	# Proteins	# PSMs	Master Protein Accessions	# Missed Cleavages	Theo. MH+ [Da]	Area: F2: Sample	XCorr Sequest HT	Confidence Sequest HT	Percolator q-Value Sequest HT	Percolator PEP Sequest HT
	High	TCQDGSSTAHQVIK	1xCarbamidomethyl [C2]	0,103272	0	1	34	2	unk	0	1531,71693	4.94822e+07	2,57	High	0	0,0526
	High	CTIEPAYTSGDAFTK	1xCarbamidomethyl [C1]	0,122085	0	1	34	2	unk	0	1660,75231	4.85469e+07	2,47	High	0	0,06672
	unk	len=1021	>gnl|unk|Mii61805_c3_g25_i1_4 len=1021; >gnl|unk|Mii61805_c3_g8_i1_4 len=1021		2,455	8	2	4	2	1	340	36,7	6,96	4.90146e+07	0,245	9,26	2
	Confidence	Sequence	Modifications	Qvality PEP	Qvality q-value	# Protein Groups	# Proteins	# PSMs	Master Protein Accessions	# Missed Cleavages	Theo. MH+ [Da]	Area: F2: Sample	XCorr Sequest HT	Confidence Sequest HT	Percolator q-Value Sequest HT	Percolator PEP Sequest HT
	High	TCQDGSSTAHQVIK	1xCarbamidomethyl [C2]	0,103272	0	1	34	2	unk	0	1531,71693	4.94822e+07	2,57	High	0	0,0526
	High	CTIEPAYTSGDAFTK	1xCarbamidomethyl [C1]	0,122085	0	1	34	2	unk	0	1660,75231	4.85469e+07	2,47	High	0	0,06672
	unk	len=1021	>gnl|unk|Mii61805_c3_g40_i1_4 len=1021; >gnl|unk|Mii61805_c3_g20_i1_4 len=1021		2,455	8	2	4	2	1	340	36,7	6,73	4.90146e+07	0,245	9,26	2
	Confidence	Sequence	Modifications	Qvality PEP	Qvality q-value	# Protein Groups	# Proteins	# PSMs	Master Protein Accessions	# Missed Cleavages	Theo. MH+ [Da]	Area: F2: Sample	XCorr Sequest HT	Confidence Sequest HT	Percolator q-Value Sequest HT	Percolator PEP Sequest HT
	High	TCQDGSSTAHQVIK	1xCarbamidomethyl [C2]	0,103272	0	1	34	2	unk	0	1531,71693	4.94822e+07	2,57	High	0	0,0526
	High	CTIEPAYTSGDAFTK	1xCarbamidomethyl [C1]	0,122085	0	1	34	2	unk	0	1660,75231	4.85469e+07	2,47	High	0	0,06672
	unk	len=1021	>gnl|unk|Mii61805_c3_g41_i1_4 len=1021; >gnl|unk|Mii61805_c3_g2_i1_4 len=1021		2,455	8	2	4	2	1	340	36,6	6,73	4.90146e+07	0,259	9,26	2
	Confidence	Sequence	Modifications	Qvality PEP	Qvality q-value	# Protein Groups	# Proteins	# PSMs	Master Protein Accessions	# Missed Cleavages	Theo. MH+ [Da]	Area: F2: Sample	XCorr Sequest HT	Confidence Sequest HT	Percolator q-Value Sequest HT	Percolator PEP Sequest HT
	High	TCQDGSSTAHQVIK	1xCarbamidomethyl [C2]	0,103272	0	1	34	2	unk	0	1531,71693	4.94822e+07	2,57	High	0	0,0526
	High	CTIEPAYTSGDAFTK	1xCarbamidomethyl [C1]	0,122085	0	1	34	2	unk	0	1660,75231	4.85469e+07	2,47	High	0	0,06672
	unk	len=1039	>gnl|unk|Mii61805_c3_g47_i1_4 len=1039; >gnl|unk|Mii61805_c3_g11_i1_4 len=1039		2,455	8	2	4	2	1	346	37,4	7,20	4.90146e+07	0,245	9,26	2
	Confidence	Sequence	Modifications	Qvality PEP	Qvality q-value	# Protein Groups	# Proteins	# PSMs	Master Protein Accessions	# Missed Cleavages	Theo. MH+ [Da]	Area: F2: Sample	XCorr Sequest HT	Confidence Sequest HT	Percolator q-Value Sequest HT	Percolator PEP Sequest HT
	High	TCQDGSSTAHQVIK	1xCarbamidomethyl [C2]	0,103272	0	1	34	2	unk	0	1531,71693	4.94822e+07	2,57	High	0	0,0526
	High	CTIEPAYTSGDAFTK	1xCarbamidomethyl [C1]	0,122085	0	1	34	2	unk	0	1660,75231	4.85469e+07	2,47	High	0	0,06672
	unk	len=1024	>gnl|unk|Mii61805_c3_g6_i1_4 len=1024		2,455	8	2	4	2	1	341	36,9	7,20	4.90146e+07	0,245	9,26	2
	Confidence	Sequence	Modifications	Qvality PEP	Qvality q-value	# Protein Groups	# Proteins	# PSMs	Master Protein Accessions	# Missed Cleavages	Theo. MH+ [Da]	Area: F2: Sample	XCorr Sequest HT	Confidence Sequest HT	Percolator q-Value Sequest HT	Percolator PEP Sequest HT
	High	TCQDGSSTAHQVIK	1xCarbamidomethyl [C2]	0,103272	0	1	34	2	unk	0	1531,71693	4.94822e+07	2,57	High	0	0,0526
	High	CTIEPAYTSGDAFTK	1xCarbamidomethyl [C1]	0,122085	0	1	34	2	unk	0	1660,75231	4.85469e+07	2,47	High	0	0,06672
	unk	len=1024	>gnl|unk|Mii61805_c3_g45_i1_4 len=1024		2,455	8	2	4	2	1	341	36,8	7,20	4.90146e+07	0,245	9,26	2
	Confidence	Sequence	Modifications	Qvality PEP	Qvality q-value	# Protein Groups	# Proteins	# PSMs	Master Protein Accessions	# Missed Cleavages	Theo. MH+ [Da]	Area: F2: Sample	XCorr Sequest HT	Confidence Sequest HT	Percolator q-Value Sequest HT	Percolator PEP Sequest HT
	High	TCQDGSSTAHQVIK	1xCarbamidomethyl [C2]	0,103272	0	1	34	2	unk	0	1531,71693	4.94822e+07	2,57	High	0	0,0526
	High	CTIEPAYTSGDAFTK	1xCarbamidomethyl [C1]	0,122085	0	1	34	2	unk	0	1660,75231	4.85469e+07	2,47	High	0	0,06672
	unk	len=1024	>gnl|unk|Mii61805_c3_g21_i1_4 len=1024; >gnl|unk|Mii61805_c3_g34_i1_4 len=1024		2,455	8	2	4	2	1	341	36,8	7,20	4.90146e+07	0,245	9,26	2
	Confidence	Sequence	Modifications	Qvality PEP	Qvality q-value	# Protein Groups	# Proteins	# PSMs	Master Protein Accessions	# Missed Cleavages	Theo. MH+ [Da]	Area: F2: Sample	XCorr Sequest HT	Confidence Sequest HT	Percolator q-Value Sequest HT	Percolator PEP Sequest HT
	High	TCQDGSSTAHQVIK	1xCarbamidomethyl [C2]	0,103272	0	1	34	2	unk	0	1531,71693	4.94822e+07	2,57	High	0	0,0526
	High	CTIEPAYTSGDAFTK	1xCarbamidomethyl [C1]	0,122085	0	1	34	2	unk	0	1660,75231	4.85469e+07	2,47	High	0	0,06672
	unk	len=1034	>gnl|unk|Mii61805_c3_g46_i1_5 len=1034		2,455	8	2	4	2	1	344	37,2	7,42	4.90146e+07	0,245	9,26	2
	Confidence	Sequence	Modifications	Qvality PEP	Qvality q-value	# Protein Groups	# Proteins	# PSMs	Master Protein Accessions	# Missed Cleavages	Theo. MH+ [Da]	Area: F2: Sample	XCorr Sequest HT	Confidence Sequest HT	Percolator q-Value Sequest HT	Percolator PEP Sequest HT
	High	TCQDGSSTAHQVIK	1xCarbamidomethyl [C2]	0,103272	0	1	34	2	unk	0	1531,71693	4.94822e+07	2,57	High	0	0,0526
	High	CTIEPAYTSGDAFTK	1xCarbamidomethyl [C1]	0,122085	0	1	34	2	unk	0	1660,75231	4.85469e+07	2,47	High	0	0,06672
	unk	len=355	>gnl|unk|Mii72132_c0_g1_i3_2 len=355		2,206	30	2	2	2	1	118	14,1	7,91	1.68812e+07	0,668	6,08	2
	Confidence	Sequence	Modifications	Qvality PEP	Qvality q-value	# Protein Groups	# Proteins	# PSMs	Master Protein Accessions	# Missed Cleavages	Theo. MH+ [Da]	Area: F2: Sample	XCorr Sequest HT	Confidence Sequest HT	Percolator q-Value Sequest HT	Percolator PEP Sequest HT
	High	CGSARPWCSTDAVYEGR	2xCarbamidomethyl [C1; C8]	0,236816	0	1	6	1	unk	0	1971,84361	1.68215e+07	2,88	High	0	0,1696
	High	YGSSRPWCSTDAVYQGNWK	1xCarbamidomethyl [C8]	0,079976	0	1	6	1	unk	0	2262,00328	1.6941e+07	3,20	High	0	0,03668007
	unk	len=775	>gnl|unk|Mii72132_c0_g1_i1_1 len=775		2,206	13,953488372093	2	2	2	1	258	30,2	7,36	1.68812e+07	0,334	6,08	2
	Confidence	Sequence	Modifications	Qvality PEP	Qvality q-value	# Protein Groups	# Proteins	# PSMs	Master Protein Accessions	# Missed Cleavages	Theo. MH+ [Da]	Area: F2: Sample	XCorr Sequest HT	Confidence Sequest HT	Percolator q-Value Sequest HT	Percolator PEP Sequest HT
	High	CGSARPWCSTDAVYEGR	2xCarbamidomethyl [C1; C8]	0,236816	0	1	6	1	unk	0	1971,84361	1.68215e+07	2,88	High	0	0,1696
	High	YGSSRPWCSTDAVYQGNWK	1xCarbamidomethyl [C8]	0,079976	0	1	6	1	unk	0	2262,00328	1.6941e+07	3,20	High	0	0,03668007
	unk	len=804	>gnl|unk|Mii72132_c0_g1_i2_1 len=804		2,206	13	2	2	2	1	268	31,2	7,65	1.68812e+07	0,274	6,08	2
	Confidence	Sequence	Modifications	Qvality PEP	Qvality q-value	# Protein Groups	# Proteins	# PSMs	Master Protein Accessions	# Missed Cleavages	Theo. MH+ [Da]	Area: F2: Sample	XCorr Sequest HT	Confidence Sequest HT	Percolator q-Value Sequest HT	Percolator PEP Sequest HT
	High	CGSARPWCSTDAVYEGR	2xCarbamidomethyl [C1; C8]	0,236816	0	1	6	1	unk	0	1971,84361	1.68215e+07	2,88	High	0	0,1696
	High	YGSSRPWCSTDAVYQGNWK	1xCarbamidomethyl [C8]	0,079976	0	1	6	1	unk	0	2262,00328	1.6941e+07	3,20	High	0	0,03668007
	unk	len=809	>gnl|unk|Mii69476_c1_g1_i2_5 len=809		2,206	13	2	2	2	1	269	31,4	7,80	1.68812e+07	0,292	6,08	2
	Confidence	Sequence	Modifications	Qvality PEP	Qvality q-value	# Protein Groups	# Proteins	# PSMs	Master Protein Accessions	# Missed Cleavages	Theo. MH+ [Da]	Area: F2: Sample	XCorr Sequest HT	Confidence Sequest HT	Percolator q-Value Sequest HT	Percolator PEP Sequest HT
	High	CGSARPWCSTDAVYEGR	2xCarbamidomethyl [C1; C8]	0,236816	0	1	6	1	unk	0	1971,84361	1.68215e+07	2,88	High	0	0,1696
	High	YGSSRPWCSTDAVYQGNWK	1xCarbamidomethyl [C8]	0,079976	0	1	6	1	unk	0	2262,00328	1.6941e+07	3,20	High	0	0,03668007
	unk	len=819	>gnl|unk|Mii69476_c1_g1_i1_6 len=819		2,206	13	2	2	2	1	273	32,0	8,32	1.68812e+07	0,292	6,08	2
	Confidence	Sequence	Modifications	Qvality PEP	Qvality q-value	# Protein Groups	# Proteins	# PSMs	Master Protein Accessions	# Missed Cleavages	Theo. MH+ [Da]	Area: F2: Sample	XCorr Sequest HT	Confidence Sequest HT	Percolator q-Value Sequest HT	Percolator PEP Sequest HT
	High	CGSARPWCSTDAVYEGR	2xCarbamidomethyl [C1; C8]	0,236816	0	1	6	1	unk	0	1971,84361	1.68215e+07	2,88	High	0	0,1696
	High	YGSSRPWCSTDAVYQGNWK	1xCarbamidomethyl [C8]	0,079976	0	1	6	1	unk	0	2262,00328	1.6941e+07	3,20	High	0	0,03668007
	unk	len=261	>gnl|unk|Mii69476_c1_g2_i1_6 len=261		1,436	22,093023255814	1	1	1	1	86	9,9	7,14	1.6941e+07	0,778	3,20	1
	Confidence	Sequence	Modifications	Qvality PEP	Qvality q-value	# Protein Groups	# Proteins	# PSMs	Master Protein Accessions	# Missed Cleavages	Theo. MH+ [Da]	Area: F2: Sample	XCorr Sequest HT	Confidence Sequest HT	Percolator q-Value Sequest HT	Percolator PEP Sequest HT
	High	YGSSRPWCSTDAVYQGNWK	1xCarbamidomethyl [C8]	0,079976	0	1	6	1	unk	0	2262,00328	1.6941e+07	3,20	High	0	0,03668007
	unk	len=2361	>gnl|unk|Mii63177_c1_g1_i1_5 len=2361		0,987	2	2	2	2	1	786	89,6	6,89	12418794	0,119	1,63	2
	Confidence	Sequence	Modifications	Qvality PEP	Qvality q-value	# Protein Groups	# Proteins	# PSMs	Master Protein Accessions	# Missed Cleavages	Theo. MH+ [Da]	Area: F2: Sample	XCorr Sequest HT	Confidence Sequest HT	Percolator q-Value Sequest HT	Percolator PEP Sequest HT
	High	INVYYNEATGGK		0,480223	0	1	7	1	unk	0	1328,64811	1.19561e+07	1,63	High	0	0,4606
	High	INVYYNEATGGKYVPR		0,288203	0	1	7	1	unk	1	1843,93372	1.28815e+07	1,92	High	0	0,2238
	unk	len=1672	>gnl|unk|Mii69743_c0_g1_i1_5 len=1672		0,987	2	2	2	2	1	557	62,8	4,87	12418794	0,186	1,63	2
	Confidence	Sequence	Modifications	Qvality PEP	Qvality q-value	# Protein Groups	# Proteins	# PSMs	Master Protein Accessions	# Missed Cleavages	Theo. MH+ [Da]	Area: F2: Sample	XCorr Sequest HT	Confidence Sequest HT	Percolator q-Value Sequest HT	Percolator PEP Sequest HT
	High	INVYYNEATGGK		0,480223	0	1	7	1	unk	0	1328,64811	1.19561e+07	1,63	High	0	0,4606
	High	INVYYNEATGGKYVPR		0,288203	0	1	7	1	unk	1	1843,93372	1.28815e+07	1,92	High	0	0,2238
	unk	len=1844	>gnl|unk|Mii64848_c0_g1_i1_1 len=1844		0,987	2	2	2	2	1	614	69,8	5,73	12418794	0,155	1,63	2
	Confidence	Sequence	Modifications	Qvality PEP	Qvality q-value	# Protein Groups	# Proteins	# PSMs	Master Protein Accessions	# Missed Cleavages	Theo. MH+ [Da]	Area: F2: Sample	XCorr Sequest HT	Confidence Sequest HT	Percolator q-Value Sequest HT	Percolator PEP Sequest HT
	High	INVYYNEATGGK		0,480223	0	1	7	1	unk	0	1328,64811	1.19561e+07	1,63	High	0	0,4606
	High	INVYYNEATGGKYVPR		0,288203	0	1	7	1	unk	1	1843,93372	1.28815e+07	1,92	High	0	0,2238
	unk	len=831	>gnl|unk|Mii70827_c0_g1_i2_2 len=831		0,987	5	2	2	2	1	277	30,5	5,34	12418794	0,389	1,63	2
	Confidence	Sequence	Modifications	Qvality PEP	Qvality q-value	# Protein Groups	# Proteins	# PSMs	Master Protein Accessions	# Missed Cleavages	Theo. MH+ [Da]	Area: F2: Sample	XCorr Sequest HT	Confidence Sequest HT	Percolator q-Value Sequest HT	Percolator PEP Sequest HT
	High	INVYYNEATGGK		0,480223	0	1	7	1	unk	0	1328,64811	1.19561e+07	1,63	High	0	0,4606
	High	INVYYNEATGGKYVPR		0,288203	0	1	7	1	unk	1	1843,93372	1.28815e+07	1,92	High	0	0,2238
	unk	len=1006	>gnl|unk|Mii62774_c0_g1_i1_5 len=1006		0,987	4	2	2	2	1	335	37,3	6,23	12418794	0,274	1,63	2
	Confidence	Sequence	Modifications	Qvality PEP	Qvality q-value	# Protein Groups	# Proteins	# PSMs	Master Protein Accessions	# Missed Cleavages	Theo. MH+ [Da]	Area: F2: Sample	XCorr Sequest HT	Confidence Sequest HT	Percolator q-Value Sequest HT	Percolator PEP Sequest HT
	High	INVYYNEATGGK		0,480223	0	1	7	1	unk	0	1328,64811	1.19561e+07	1,63	High	0	0,4606
	High	INVYYNEATGGKYVPR		0,288203	0	1	7	1	unk	1	1843,93372	1.28815e+07	1,92	High	0	0,2238
	unk	len=803	>gnl|unk|Mii70827_c0_g1_i3_1 len=803		0,987	5	2	2	2	1	268	29,2	4,96	12418794	0,389	1,63	2
	Confidence	Sequence	Modifications	Qvality PEP	Qvality q-value	# Protein Groups	# Proteins	# PSMs	Master Protein Accessions	# Missed Cleavages	Theo. MH+ [Da]	Area: F2: Sample	XCorr Sequest HT	Confidence Sequest HT	Percolator q-Value Sequest HT	Percolator PEP Sequest HT
	High	INVYYNEATGGK		0,480223	0	1	7	1	unk	0	1328,64811	1.19561e+07	1,63	High	0	0,4606
	High	INVYYNEATGGKYVPR		0,288203	0	1	7	1	unk	1	1843,93372	1.28815e+07	1,92	High	0	0,2238
	unk	len=1503	>gnl|unk|Mii70827_c0_g1_i1_2 len=1503		0,987	3,2	2	2	2	1	500	56,1	5,05	12418794	0,194	1,63	2
	Confidence	Sequence	Modifications	Qvality PEP	Qvality q-value	# Protein Groups	# Proteins	# PSMs	Master Protein Accessions	# Missed Cleavages	Theo. MH+ [Da]	Area: F2: Sample	XCorr Sequest HT	Confidence Sequest HT	Percolator q-Value Sequest HT	Percolator PEP Sequest HT
	High	INVYYNEATGGK		0,480223	0	1	7	1	unk	0	1328,64811	1.19561e+07	1,63	High	0	0,4606
	High	INVYYNEATGGKYVPR		0,288203	0	1	7	1	unk	1	1843,93372	1.28815e+07	1,92	High	0	0,2238
	unk	len=661	>gnl|unk|Mii72132_c0_g1_i4_1 len=661		0,771	7	1	1	1	1	220	25,7	6,87	1.68215e+07	0,194	2,88	1
	Confidence	Sequence	Modifications	Qvality PEP	Qvality q-value	# Protein Groups	# Proteins	# PSMs	Master Protein Accessions	# Missed Cleavages	Theo. MH+ [Da]	Area: F2: Sample	XCorr Sequest HT	Confidence Sequest HT	Percolator q-Value Sequest HT	Percolator PEP Sequest HT
	High	CGSARPWCSTDAVYEGR	2xCarbamidomethyl [C1; C8]	0,236816	0	1	6	1	unk	0	1971,84361	1.68215e+07	2,88	High	0	0,1696
	unk	len=309	>gnl|unk|Mii66946_c0_g2_i1_5 len=309		0,377	19	1	1	1	1	102	10,7	4,61	2.73072e+07	0,585	0,00	1
	Confidence	Sequence	Modifications	Qvality PEP	Qvality q-value	# Protein Groups	# Proteins	# PSMs	Master Protein Accessions	# Missed Cleavages	Theo. MH+ [Da]	Area: F2: Sample	XCorr Sequest HT	Confidence Sequest HT	Percolator q-Value Sequest HT	Percolator PEP Sequest HT
	High	TDLIPKDNVDISFPNNPERK		0,449283	0	1	2	1	unk	2	2312,18810	2.73072e+07	1,75	High	0	0,4194
	unk	len=229	>gnl|unk|Mii66946_c0_g2_i2_5 len=229		0,377	26	1	1	1	1	76	8,4	4,61	2.73072e+07	0,585	0,00	1
	Confidence	Sequence	Modifications	Qvality PEP	Qvality q-value	# Protein Groups	# Proteins	# PSMs	Master Protein Accessions	# Missed Cleavages	Theo. MH+ [Da]	Area: F2: Sample	XCorr Sequest HT	Confidence Sequest HT	Percolator q-Value Sequest HT	Percolator PEP Sequest HT
	High	TDLIPKDNVDISFPNNPERK		0,449283	0	1	2	1	unk	2	2312,18810	2.73072e+07	1,75	High	0	0,4194
	unk	len=362	>gnl|unk|Mii34086_c0_g1_i1_3 len=362		0,366	6	1	3	1	1	120	13,9	9,42	3.35475e+09	0,292	0,00	1
	Confidence	Sequence	Modifications	Qvality PEP	Qvality q-value	# Protein Groups	# Proteins	# PSMs	Master Protein Accessions	# Missed Cleavages	Theo. MH+ [Da]	Area: F2: Sample	XCorr Sequest HT	Confidence Sequest HT	Percolator q-Value Sequest HT	Percolator PEP Sequest HT
	High	KAEIVSPR		0,457802	0	1	1	3	unk	1	899,53089	3.35475e+09	1,48	High	0	0,5683
	unk	len=5750	>gnl|unk|Mii78597_c0_g1_i2_6 len=5750		0,272	0,834637454355764	1	1	1	1	1917	212,3	5,19	1.52667e+07	0,018	0,00	1
	Confidence	Sequence	Modifications	Qvality PEP	Qvality q-value	# Protein Groups	# Proteins	# PSMs	Master Protein Accessions	# Missed Cleavages	Theo. MH+ [Da]	Area: F2: Sample	XCorr Sequest HT	Confidence Sequest HT	Percolator q-Value Sequest HT	Percolator PEP Sequest HT
	High	GTVWECTKNPCPATCK	3xCarbamidomethyl [C6; C11; C15]	0,532945	0	1	2	1	unk	1	1908,84010	1.52667e+07	1,68	High	0	0,5342
	unk	len=5771	>gnl|unk|Mii78597_c0_g1_i3_6 len=5771		0,272	0,831600831600832	1	1	1	1	1924	212,9	5,19	1.52667e+07	0,018	0,00	1
	Confidence	Sequence	Modifications	Qvality PEP	Qvality q-value	# Protein Groups	# Proteins	# PSMs	Master Protein Accessions	# Missed Cleavages	Theo. MH+ [Da]	Area: F2: Sample	XCorr Sequest HT	Confidence Sequest HT	Percolator q-Value Sequest HT	Percolator PEP Sequest HT
	High	GTVWECTKNPCPATCK	3xCarbamidomethyl [C6; C11; C15]	0,532945	0	1	2	1	unk	1	1908,84010	1.52667e+07	1,68	High	0	0,5342
	unk	len=2630	>gnl|unk|Mii75705_c0_g1_i2_5 len=2630		0,264	5	1	1	1	1	876	100,4	8,13	7.25764e+08	0,049	3,84	1
	Confidence	Sequence	Modifications	Qvality PEP	Qvality q-value	# Protein Groups	# Proteins	# PSMs	Master Protein Accessions	# Missed Cleavages	Theo. MH+ [Da]	Area: F2: Sample	XCorr Sequest HT	Confidence Sequest HT	Percolator q-Value Sequest HT	Percolator PEP Sequest HT
	High	FPNVAKAEMEISDYLADVSLEESGAALDLGSHHIVMRNNQENER	2xOxidation [M9; M36]	0,541199	0	1	3	1	unk	2	4931,32106	7.25764e+08	3,84	High	0	0,5451
	unk	len=2666	>gnl|unk|Mii75705_c0_g1_i3_5 len=2666		0,264	4	1	1	1	1	888	101,8	8,34	7.25764e+08	0,049	3,84	1
	Confidence	Sequence	Modifications	Qvality PEP	Qvality q-value	# Protein Groups	# Proteins	# PSMs	Master Protein Accessions	# Missed Cleavages	Theo. MH+ [Da]	Area: F2: Sample	XCorr Sequest HT	Confidence Sequest HT	Percolator q-Value Sequest HT	Percolator PEP Sequest HT
	High	FPNVAKAEMEISDYLADVSLEESGAALDLGSHHIVMRNNQENER	2xOxidation [M9; M36]	0,541199	0	1	3	1	unk	2	4931,32106	7.25764e+08	3,84	High	0	0,5451
	unk	len=2665	>gnl|unk|Mii75705_c0_g1_i8_4 len=2665		0,264	4	1	1	1	1	888	101,7	7,94	7.25764e+08	0,055	3,84	1
	Confidence	Sequence	Modifications	Qvality PEP	Qvality q-value	# Protein Groups	# Proteins	# PSMs	Master Protein Accessions	# Missed Cleavages	Theo. MH+ [Da]	Area: F2: Sample	XCorr Sequest HT	Confidence Sequest HT	Percolator q-Value Sequest HT	Percolator PEP Sequest HT
	High	FPNVAKAEMEISDYLADVSLEESGAALDLGSHHIVMRNNQENER	2xOxidation [M9; M36]	0,541199	0	1	3	1	unk	2	4931,32106	7.25764e+08	3,84	High	0	0,5451
	unk	len=350	>gnl|unk|Mii16738_c0_g1_i1_1 len=350		0,261	8	1	1	1	1	115	13,4	8,57	30315995028	0,292	0,00	1
	Confidence	Sequence	Modifications	Qvality PEP	Qvality q-value	# Protein Groups	# Proteins	# PSMs	Master Protein Accessions	# Missed Cleavages	Theo. MH+ [Da]	Area: F2: Sample	XCorr Sequest HT	Confidence Sequest HT	Percolator q-Value Sequest HT	Percolator PEP Sequest HT
	High	DRLATISGGR		0,543979	0	1	1	1	unk	1	1045,57488	30315995028	1,35	High	0	0,5488
	unk	len=1913	>gnl|unk|Mii64881_c0_g1_i1_6 len=1913		0,245	2	1	1	1	1	638	73,6	8,38	3.3533e+07	0,072	0,00	1
	Confidence	Sequence	Modifications	Qvality PEP	Qvality q-value	# Protein Groups	# Proteins	# PSMs	Master Protein Accessions	# Missed Cleavages	Theo. MH+ [Da]	Area: F2: Sample	XCorr Sequest HT	Confidence Sequest HT	Percolator q-Value Sequest HT	Percolator PEP Sequest HT
	High	VSSGCQCKTETDELLDLK	2xCarbamidomethyl [C5; C7]	0,55714	0	1	1	1	unk	1	2082,96820	3.3533e+07	1,28	High	0	0,5683
	unk	len=1173	>gnl|unk|Mii65893_c1_g1_i1_4 len=1173		0,245	2	1	1	1	1	391	45,8	9,45	1.00165e+07	0,122	0,00	1
	Confidence	Sequence	Modifications	Qvality PEP	Qvality q-value	# Protein Groups	# Proteins	# PSMs	Master Protein Accessions	# Missed Cleavages	Theo. MH+ [Da]	Area: F2: Sample	XCorr Sequest HT	Confidence Sequest HT	Percolator q-Value Sequest HT	Percolator PEP Sequest HT
	High	DYTENLNTLR		0,55714	0	1	1	1	unk	0	1238,60116	1.00165e+07	1,27	High	0	0,5683

## Sheet: footprints intact Animals 1
Accession	Description	Score	Coverage	# Proteins	# Unique Peptides	# Peptides	# PSMs	Area	# AAs	MW [kDa]	calc. pI
unk	len=309 - [Mii66946_c0_g2_i1_5]	12.4643	19.61	1	0	3	4	6.77596e+07	102	10.7264	4.61475
	A2	Sequence	# PSMs	# Proteins	# Protein Groups	Protein Group Accessions	Modifications	ΔCn	Area	XCorr	Charge	MH+ [Da]	ΔM [ppm]	RT [min]	# Missed Cleavages
	High	TDLIPKDNVDISFPNNPER	1	2	2	unk		0	9.0895e+07	4.20154	3	2184.1	1.98115	38.1173	1
	High	TDLIPKDNVDISFPNNPERK	1	2	2	unk		0	7.94922e+07	2.78516	3	2312.19	2.00369	36.1967	2
	High	DNVDISFPNNPER	2	4	4	unk		0	3.28916e+07	2.74806	2	1516.71	2.70547	34.4306	0
unk	len=229 - [Mii66946_c0_g2_i2_5]	12.4643	26.32	1	0	3	4	6.77596e+07	76	8.40621	4.61475
	A2	Sequence	# PSMs	# Proteins	# Protein Groups	Protein Group Accessions	Modifications	ΔCn	Area	XCorr	Charge	MH+ [Da]	ΔM [ppm]	RT [min]	# Missed Cleavages
	High	TDLIPKDNVDISFPNNPER	1	2	2	unk		0	9.0895e+07	4.20154	3	2184.1	1.98115	38.1173	1
	High	TDLIPKDNVDISFPNNPERK	1	2	2	unk		0	7.94922e+07	2.78516	3	2312.19	2.00369	36.1967	2
	High	DNVDISFPNNPER	2	4	4	unk		0	3.28916e+07	2.74806	2	1516.71	2.70547	34.4306	0
unk	len=1034 - [Mii61805_c3_g1_i1_5]	6.16178	3.49	1	0	1	2	3.95427e+07	344	37.1517	7.41553
	A2	Sequence	# PSMs	# Proteins	# Protein Groups	Protein Group Accessions	Modifications	ΔCn	Area	XCorr	Charge	MH+ [Da]	ΔM [ppm]	RT [min]	# Missed Cleavages
	High	VYRDIVNAVSTK	2	34	34	unk		0	3.95427e+07	3.33865	3	1364.75	-0.374109	30.0214	1
unk	len=1021 - [Mii61805_c3_g2_i1_4]	6.16178	3.53	1	0	1	2	3.95427e+07	340	36.5984	6.72705
	A2	Sequence	# PSMs	# Proteins	# Protein Groups	Protein Group Accessions	Modifications	ΔCn	Area	XCorr	Charge	MH+ [Da]	ΔM [ppm]	RT [min]	# Missed Cleavages
	High	VYRDIVNAVSTK	2	34	34	unk		0	3.95427e+07	3.33865	3	1364.75	-0.374109	30.0214	1
unk	len=1001 - [Mii61805_c3_g3_i1_5]	6.16178	3.6	1	0	1	2	3.95427e+07	333	35.752	6.96143
	A2	Sequence	# PSMs	# Proteins	# Protein Groups	Protein Group Accessions	Modifications	ΔCn	Area	XCorr	Charge	MH+ [Da]	ΔM [ppm]	RT [min]	# Missed Cleavages
	High	VYRDIVNAVSTK	2	34	34	unk		0	3.95427e+07	3.33865	3	1364.75	-0.374109	30.0214	1
unk	len=1021 - [Mii61805_c3_g4_i1_4]	6.16178	3.53	1	0	1	2	3.95427e+07	340	36.6985	6.96143
	A2	Sequence	# PSMs	# Proteins	# Protein Groups	Protein Group Accessions	Modifications	ΔCn	Area	XCorr	Charge	MH+ [Da]	ΔM [ppm]	RT [min]	# Missed Cleavages
	High	VYRDIVNAVSTK	2	34	34	unk		0	3.95427e+07	3.33865	3	1364.75	-0.374109	30.0214	1
unk	len=1024 - [Mii61805_c3_g5_i1_4]	6.16178	3.52	1	0	1	2	3.95427e+07	341	36.8096	7.1958
	A2	Sequence	# PSMs	# Proteins	# Protein Groups	Protein Group Accessions	Modifications	ΔCn	Area	XCorr	Charge	MH+ [Da]	ΔM [ppm]	RT [min]	# Missed Cleavages
	High	VYRDIVNAVSTK	2	34	34	unk		0	3.95427e+07	3.33865	3	1364.75	-0.374109	30.0214	1
unk	len=1024 - [Mii61805_c3_g6_i1_4]	6.16178	3.52	1	0	1	2	3.95427e+07	341	36.8676	7.1958
	A2	Sequence	# PSMs	# Proteins	# Protein Groups	Protein Group Accessions	Modifications	ΔCn	Area	XCorr	Charge	MH+ [Da]	ΔM [ppm]	RT [min]	# Missed Cleavages
	High	VYRDIVNAVSTK	2	34	34	unk		0	3.95427e+07	3.33865	3	1364.75	-0.374109	30.0214	1
unk	len=1024 - [Mii61805_c3_g7_i1_4]	6.16178	3.52	1	0	1	2	3.95427e+07	341	36.7955	7.1958
	A2	Sequence	# PSMs	# Proteins	# Protein Groups	Protein Group Accessions	Modifications	ΔCn	Area	XCorr	Charge	MH+ [Da]	ΔM [ppm]	RT [min]	# Missed Cleavages
	High	VYRDIVNAVSTK	2	34	34	unk		0	3.95427e+07	3.33865	3	1364.75	-0.374109	30.0214	1
unk	len=1021 - [Mii61805_c3_g8_i1_4]	6.16178	3.53	1	0	1	2	3.95427e+07	340	36.7005	6.96143
	A2	Sequence	# PSMs	# Proteins	# Protein Groups	Protein Group Accessions	Modifications	ΔCn	Area	XCorr	Charge	MH+ [Da]	ΔM [ppm]	RT [min]	# Missed Cleavages
	High	VYRDIVNAVSTK	2	34	34	unk		0	3.95427e+07	3.33865	3	1364.75	-0.374109	30.0214	1
unk	len=1021 - [Mii61805_c3_g9_i1_4]	6.16178	3.53	1	0	1	2	3.95427e+07	340	36.6014	6.72705
	A2	Sequence	# PSMs	# Proteins	# Protein Groups	Protein Group Accessions	Modifications	ΔCn	Area	XCorr	Charge	MH+ [Da]	ΔM [ppm]	RT [min]	# Missed Cleavages
	High	VYRDIVNAVSTK	2	34	34	unk		0	3.95427e+07	3.33865	3	1364.75	-0.374109	30.0214	1
unk	len=1024 - [Mii61805_c3_g10_i1_4]	6.16178	3.52	1	0	1	2	3.95427e+07	341	36.7965	6.96143
	A2	Sequence	# PSMs	# Proteins	# Protein Groups	Protein Group Accessions	Modifications	ΔCn	Area	XCorr	Charge	MH+ [Da]	ΔM [ppm]	RT [min]	# Missed Cleavages
	High	VYRDIVNAVSTK	2	34	34	unk		0	3.95427e+07	3.33865	3	1364.75	-0.374109	30.0214	1
unk	len=1039 - [Mii61805_c3_g11_i1_4]	6.16178	3.47	1	0	1	2	3.95427e+07	346	37.4088	7.1958
	A2	Sequence	# PSMs	# Proteins	# Protein Groups	Protein Group Accessions	Modifications	ΔCn	Area	XCorr	Charge	MH+ [Da]	ΔM [ppm]	RT [min]	# Missed Cleavages
	High	VYRDIVNAVSTK	2	34	34	unk		0	3.95427e+07	3.33865	3	1364.75	-0.374109	30.0214	1
unk	len=1021 - [Mii61805_c3_g12_i1_4]	6.16178	3.53	1	0	1	2	3.95427e+07	340	36.5974	6.96143
	A2	Sequence	# PSMs	# Proteins	# Protein Groups	Protein Group Accessions	Modifications	ΔCn	Area	XCorr	Charge	MH+ [Da]	ΔM [ppm]	RT [min]	# Missed Cleavages
	High	VYRDIVNAVSTK	2	34	34	unk		0	3.95427e+07	3.33865	3	1364.75	-0.374109	30.0214	1
unk	len=1015 - [Mii61805_c3_g13_i1_4]	6.16178	3.55	1	0	1	2	3.95427e+07	338	36.4674	6.96143
	A2	Sequence	# PSMs	# Proteins	# Protein Groups	Protein Group Accessions	Modifications	ΔCn	Area	XCorr	Charge	MH+ [Da]	ΔM [ppm]	RT [min]	# Missed Cleavages
	High	VYRDIVNAVSTK	2	34	34	unk		0	3.95427e+07	3.33865	3	1364.75	-0.374109	30.0214	1
unk	len=1024 - [Mii61805_c3_g14_i1_4]	6.16178	3.52	1	0	1	2	3.95427e+07	341	36.8376	7.1958
	A2	Sequence	# PSMs	# Proteins	# Protein Groups	Protein Group Accessions	Modifications	ΔCn	Area	XCorr	Charge	MH+ [Da]	ΔM [ppm]	RT [min]	# Missed Cleavages
	High	VYRDIVNAVSTK	2	34	34	unk		0	3.95427e+07	3.33865	3	1364.75	-0.374109	30.0214	1
unk	len=1021 - [Mii61805_c3_g16_i1_4]	6.16178	3.53	1	0	1	2	3.95427e+07	340	36.6294	6.72705
	A2	Sequence	# PSMs	# Proteins	# Protein Groups	Protein Group Accessions	Modifications	ΔCn	Area	XCorr	Charge	MH+ [Da]	ΔM [ppm]	RT [min]	# Missed Cleavages
	High	VYRDIVNAVSTK	2	34	34	unk		0	3.95427e+07	3.33865	3	1364.75	-0.374109	30.0214	1
unk	len=1021 - [Mii61805_c3_g17_i1_4]	6.16178	3.53	1	0	1	2	3.95427e+07	340	36.7015	6.96143
	A2	Sequence	# PSMs	# Proteins	# Protein Groups	Protein Group Accessions	Modifications	ΔCn	Area	XCorr	Charge	MH+ [Da]	ΔM [ppm]	RT [min]	# Missed Cleavages
	High	VYRDIVNAVSTK	2	34	34	unk		0	3.95427e+07	3.33865	3	1364.75	-0.374109	30.0214	1
unk	len=1021 - [Mii61805_c3_g19_i1_4]	6.16178	3.53	1	0	1	2	3.95427e+07	340	36.6254	6.96143
	A2	Sequence	# PSMs	# Proteins	# Protein Groups	Protein Group Accessions	Modifications	ΔCn	Area	XCorr	Charge	MH+ [Da]	ΔM [ppm]	RT [min]	# Missed Cleavages
	High	VYRDIVNAVSTK	2	34	34	unk		0	3.95427e+07	3.33865	3	1364.75	-0.374109	30.0214	1
unk	len=1021 - [Mii61805_c3_g20_i1_4]	6.16178	3.53	1	0	1	2	3.95427e+07	340	36.6714	6.72705
	A2	Sequence	# PSMs	# Proteins	# Protein Groups	Protein Group Accessions	Modifications	ΔCn	Area	XCorr	Charge	MH+ [Da]	ΔM [ppm]	RT [min]	# Missed Cleavages
	High	VYRDIVNAVSTK	2	34	34	unk		0	3.95427e+07	3.33865	3	1364.75	-0.374109	30.0214	1
unk	len=1024 - [Mii61805_c3_g21_i1_4]	6.16178	3.52	1	0	1	2	3.95427e+07	341	36.8396	7.1958
	A2	Sequence	# PSMs	# Proteins	# Protein Groups	Protein Group Accessions	Modifications	ΔCn	Area	XCorr	Charge	MH+ [Da]	ΔM [ppm]	RT [min]	# Missed Cleavages
	High	VYRDIVNAVSTK	2	34	34	unk		0	3.95427e+07	3.33865	3	1364.75	-0.374109	30.0214	1
unk	len=1021 - [Mii61805_c3_g22_i1_4]	6.16178	3.53	1	0	1	2	3.95427e+07	340	36.6705	6.96143
	A2	Sequence	# PSMs	# Proteins	# Protein Groups	Protein Group Accessions	Modifications	ΔCn	Area	XCorr	Charge	MH+ [Da]	ΔM [ppm]	RT [min]	# Missed Cleavages
	High	VYRDIVNAVSTK	2	34	34	unk		0	3.95427e+07	3.33865	3	1364.75	-0.374109	30.0214	1
unk	len=987 - [Mii61805_c3_g23_i1_6]	6.16178	3.66	1	0	1	2	3.95427e+07	328	35.2687	6.96143
	A2	Sequence	# PSMs	# Proteins	# Protein Groups	Protein Group Accessions	Modifications	ΔCn	Area	XCorr	Charge	MH+ [Da]	ΔM [ppm]	RT [min]	# Missed Cleavages
	High	VYRDIVNAVSTK	2	34	34	unk		0	3.95427e+07	3.33865	3	1364.75	-0.374109	30.0214	1
unk	len=1034 - [Mii61805_c3_g24_i1_5]	6.16178	3.49	1	0	1	2	3.95427e+07	344	37.1527	7.1958
	A2	Sequence	# PSMs	# Proteins	# Protein Groups	Protein Group Accessions	Modifications	ΔCn	Area	XCorr	Charge	MH+ [Da]	ΔM [ppm]	RT [min]	# Missed Cleavages
	High	VYRDIVNAVSTK	2	34	34	unk		0	3.95427e+07	3.33865	3	1364.75	-0.374109	30.0214	1
unk	len=1021 - [Mii61805_c3_g27_i1_4]	6.16178	3.53	1	0	1	2	3.95427e+07	340	36.6024	6.72705
	A2	Sequence	# PSMs	# Proteins	# Protein Groups	Protein Group Accessions	Modifications	ΔCn	Area	XCorr	Charge	MH+ [Da]	ΔM [ppm]	RT [min]	# Missed Cleavages
	High	VYRDIVNAVSTK	2	34	34	unk		0	3.95427e+07	3.33865	3	1364.75	-0.374109	30.0214	1
unk	len=1034 - [Mii61805_c3_g29_i1_5]	6.16178	3.49	1	0	1	2	3.95427e+07	344	37.1817	7.41553
	A2	Sequence	# PSMs	# Proteins	# Protein Groups	Protein Group Accessions	Modifications	ΔCn	Area	XCorr	Charge	MH+ [Da]	ΔM [ppm]	RT [min]	# Missed Cleavages
	High	VYRDIVNAVSTK	2	34	34	unk		0	3.95427e+07	3.33865	3	1364.75	-0.374109	30.0214	1
unk	len=1021 - [Mii61805_c3_g31_i1_4]	6.16178	3.53	1	0	1	2	3.95427e+07	340	36.7285	6.96143
	A2	Sequence	# PSMs	# Proteins	# Protein Groups	Protein Group Accessions	Modifications	ΔCn	Area	XCorr	Charge	MH+ [Da]	ΔM [ppm]	RT [min]	# Missed Cleavages
	High	VYRDIVNAVSTK	2	34	34	unk		0	3.95427e+07	3.33865	3	1364.75	-0.374109	30.0214	1
unk	len=1034 - [Mii61805_c3_g32_i1_5]	6.16178	3.49	1	0	1	2	3.95427e+07	344	37.2097	7.41553
	A2	Sequence	# PSMs	# Proteins	# Protein Groups	Protein Group Accessions	Modifications	ΔCn	Area	XCorr	Charge	MH+ [Da]	ΔM [ppm]	RT [min]	# Missed Cleavages
	High	VYRDIVNAVSTK	2	34	34	unk		0	3.95427e+07	3.33865	3	1364.75	-0.374109	30.0214	1
unk	len=1024 - [Mii61805_c3_g33_i1_4]	6.16178	3.52	1	0	1	2	3.95427e+07	341	36.8105	6.96143
	A2	Sequence	# PSMs	# Proteins	# Protein Groups	Protein Group Accessions	Modifications	ΔCn	Area	XCorr	Charge	MH+ [Da]	ΔM [ppm]	RT [min]	# Missed Cleavages
	High	VYRDIVNAVSTK	2	34	34	unk		0	3.95427e+07	3.33865	3	1364.75	-0.374109	30.0214	1
unk	len=1039 - [Mii61805_c3_g36_i1_4]	6.16178	3.47	1	0	1	2	3.95427e+07	346	37.4388	7.1958
	A2	Sequence	# PSMs	# Proteins	# Protein Groups	Protein Group Accessions	Modifications	ΔCn	Area	XCorr	Charge	MH+ [Da]	ΔM [ppm]	RT [min]	# Missed Cleavages
	High	VYRDIVNAVSTK	2	34	34	unk		0	3.95427e+07	3.33865	3	1364.75	-0.374109	30.0214	1
unk	len=1039 - [Mii61805_c3_g37_i1_4]	6.16178	3.47	1	0	1	2	3.95427e+07	346	37.4668	7.1958
	A2	Sequence	# PSMs	# Proteins	# Protein Groups	Protein Group Accessions	Modifications	ΔCn	Area	XCorr	Charge	MH+ [Da]	ΔM [ppm]	RT [min]	# Missed Cleavages
	High	VYRDIVNAVSTK	2	34	34	unk		0	3.95427e+07	3.33865	3	1364.75	-0.374109	30.0214	1
unk	len=1034 - [Mii61805_c3_g38_i1_5]	6.16178	3.49	1	0	1	2	3.95427e+07	344	37.1827	7.41553
	A2	Sequence	# PSMs	# Proteins	# Protein Groups	Protein Group Accessions	Modifications	ΔCn	Area	XCorr	Charge	MH+ [Da]	ΔM [ppm]	RT [min]	# Missed Cleavages
	High	VYRDIVNAVSTK	2	34	34	unk		0	3.95427e+07	3.33865	3	1364.75	-0.374109	30.0214	1
unk	len=1024 - [Mii61805_c3_g39_i1_4]	6.16178	3.52	1	0	1	2	3.95427e+07	341	36.8406	7.1958
	A2	Sequence	# PSMs	# Proteins	# Protein Groups	Protein Group Accessions	Modifications	ΔCn	Area	XCorr	Charge	MH+ [Da]	ΔM [ppm]	RT [min]	# Missed Cleavages
	High	VYRDIVNAVSTK	2	34	34	unk		0	3.95427e+07	3.33865	3	1364.75	-0.374109	30.0214	1
unk	len=1024 - [Mii61805_c3_g45_i1_4]	6.16178	3.52	1	0	1	2	3.95427e+07	341	36.8236	7.1958
	A2	Sequence	# PSMs	# Proteins	# Protein Groups	Protein Group Accessions	Modifications	ΔCn	Area	XCorr	Charge	MH+ [Da]	ΔM [ppm]	RT [min]	# Missed Cleavages
	High	VYRDIVNAVSTK	2	34	34	unk		0	3.95427e+07	3.33865	3	1364.75	-0.374109	30.0214	1
unk	len=1034 - [Mii61805_c3_g46_i1_5]	6.16178	3.49	1	0	1	2	3.95427e+07	344	37.1797	7.41553
	A2	Sequence	# PSMs	# Proteins	# Protein Groups	Protein Group Accessions	Modifications	ΔCn	Area	XCorr	Charge	MH+ [Da]	ΔM [ppm]	RT [min]	# Missed Cleavages
	High	VYRDIVNAVSTK	2	34	34	unk		0	3.95427e+07	3.33865	3	1364.75	-0.374109	30.0214	1
unk	len=913 - [Mii65436_c1_g1_i1_2]	6.16178	3.95	1	0	1	2	3.95427e+07	304	32.3014	7.1958
	A2	Sequence	# PSMs	# Proteins	# Protein Groups	Protein Group Accessions	Modifications	ΔCn	Area	XCorr	Charge	MH+ [Da]	ΔM [ppm]	RT [min]	# Missed Cleavages
	High	VYRDIVNAVSTK	2	34	34	unk		0	3.95427e+07	3.33865	3	1364.75	-0.374109	30.0214	1
unk	len=722 - [Mii59191_c0_g1_i1_4]	5.47756	5.42	1	0	1	2	3.28916e+07	240	27.4797	8.35303
	A2	Sequence	# PSMs	# Proteins	# Protein Groups	Protein Group Accessions	Modifications	ΔCn	Area	XCorr	Charge	MH+ [Da]	ΔM [ppm]	RT [min]	# Missed Cleavages
	High	DNVDISFPNNPER	2	4	4	unk		0	3.28916e+07	2.74806	2	1516.71	2.70547	34.4306	0
unk	len=804 - [Mii59191_c0_g2_i1_4]	5.47756	4.85	1	0	1	2	3.28916e+07	268	31.3165	8.67529
	A2	Sequence	# PSMs	# Proteins	# Protein Groups	Protein Group Accessions	Modifications	ΔCn	Area	XCorr	Charge	MH+ [Da]	ΔM [ppm]	RT [min]	# Missed Cleavages
	High	DNVDISFPNNPER	2	4	4	unk		0	3.28916e+07	2.74806	2	1516.71	2.70547	34.4306	0

## Sheet: footprints intact Animals 2
Accession	Description	Score	Coverage	# Proteins	# Unique Peptides	# Peptides	# PSMs	Area	# AAs	MW [kDa]	calc. pI
unk	len=1034 - [Mii61805_c3_g1_i1_5]	25.6963	13.37	1	0	3	8	1.55533e+08	344	37.1517	7.41553
	A2	Sequence	# PSMs	# Proteins	# Protein Groups	Protein Group Accessions	Modifications	ΔCn	Area	XCorr	Charge	MH+ [Da]	ΔM [ppm]	RT [min]	# Missed Cleavages
	High	VYRDIVNAVSTK	5	34	34	unk		0	1.35934e+08	3.90969	3	1364.75	0.766314	28.9266	1
	High	cTIEPAYTSGDAFTK	2	34	34	unk	C1(Carbamidomethyl)	0	326177167	3.23939	2	1660.75	1.31802	32.2594	0
	High	AGYAAGVAcDSGTNNAEcK	1	34	34	unk	C9(Carbamidomethyl); C18(Carbamidomethyl)	0	4.48713e+06	3.11801	2	1915.79	1.82269	23.8562	0
unk	len=1021 - [Mii61805_c3_g2_i1_4]	25.6963	13.53	1	0	3	8	1.55533e+08	340	36.5984	6.72705
	A2	Sequence	# PSMs	# Proteins	# Protein Groups	Protein Group Accessions	Modifications	ΔCn	Area	XCorr	Charge	MH+ [Da]	ΔM [ppm]	RT [min]	# Missed Cleavages
	High	VYRDIVNAVSTK	5	34	34	unk		0	1.35934e+08	3.90969	3	1364.75	0.766314	28.9266	1
	High	cTIEPAYTSGDAFTK	2	34	34	unk	C1(Carbamidomethyl)	0	326177167	3.23939	2	1660.75	1.31802	32.2594	0
	High	AGYAAGVAcDSGTNNAEcK	1	34	34	unk	C9(Carbamidomethyl); C18(Carbamidomethyl)	0	4.48713e+06	3.11801	2	1915.79	1.82269	23.8562	0
unk	len=1001 - [Mii61805_c3_g3_i1_5]	25.6963	13.81	1	0	3	8	1.55533e+08	333	35.752	6.96143
	A2	Sequence	# PSMs	# Proteins	# Protein Groups	Protein Group Accessions	Modifications	ΔCn	Area	XCorr	Charge	MH+ [Da]	ΔM [ppm]	RT [min]	# Missed Cleavages
	High	VYRDIVNAVSTK	5	34	34	unk		0	1.35934e+08	3.90969	3	1364.75	0.766314	28.9266	1
	High	cTIEPAYTSGDAFTK	2	34	34	unk	C1(Carbamidomethyl)	0	326177167	3.23939	2	1660.75	1.31802	32.2594	0
	High	AGYAAGVAcDSGTNNAEcK	1	34	34	unk	C9(Carbamidomethyl); C18(Carbamidomethyl)	0	4.48713e+06	3.11801	2	1915.79	1.82269	23.8562	0
unk	len=1021 - [Mii61805_c3_g4_i1_4]	25.6963	13.53	1	0	3	8	1.55533e+08	340	36.6985	6.96143
	A2	Sequence	# PSMs	# Proteins	# Protein Groups	Protein Group Accessions	Modifications	ΔCn	Area	XCorr	Charge	MH+ [Da]	ΔM [ppm]	RT [min]	# Missed Cleavages
	High	VYRDIVNAVSTK	5	34	34	unk		0	1.35934e+08	3.90969	3	1364.75	0.766314	28.9266	1
	High	cTIEPAYTSGDAFTK	2	34	34	unk	C1(Carbamidomethyl)	0	326177167	3.23939	2	1660.75	1.31802	32.2594	0
	High	AGYAAGVAcDSGTNNAEcK	1	34	34	unk	C9(Carbamidomethyl); C18(Carbamidomethyl)	0	4.48713e+06	3.11801	2	1915.79	1.82269	23.8562	0
unk	len=1024 - [Mii61805_c3_g5_i1_4]	25.6963	13.49	1	0	3	8	1.55533e+08	341	36.8096	7.1958
	A2	Sequence	# PSMs	# Proteins	# Protein Groups	Protein Group Accessions	Modifications	ΔCn	Area	XCorr	Charge	MH+ [Da]	ΔM [ppm]	RT [min]	# Missed Cleavages
	High	VYRDIVNAVSTK	5	34	34	unk		0	1.35934e+08	3.90969	3	1364.75	0.766314	28.9266	1
	High	cTIEPAYTSGDAFTK	2	34	34	unk	C1(Carbamidomethyl)	0	326177167	3.23939	2	1660.75	1.31802	32.2594	0
	High	AGYAAGVAcDSGTNNAEcK	1	34	34	unk	C9(Carbamidomethyl); C18(Carbamidomethyl)	0	4.48713e+06	3.11801	2	1915.79	1.82269	23.8562	0
unk	len=1024 - [Mii61805_c3_g6_i1_4]	25.6963	13.49	1	0	3	8	1.55533e+08	341	36.8676	7.1958
	A2	Sequence	# PSMs	# Proteins	# Protein Groups	Protein Group Accessions	Modifications	ΔCn	Area	XCorr	Charge	MH+ [Da]	ΔM [ppm]	RT [min]	# Missed Cleavages
	High	VYRDIVNAVSTK	5	34	34	unk		0	1.35934e+08	3.90969	3	1364.75	0.766314	28.9266	1
	High	cTIEPAYTSGDAFTK	2	34	34	unk	C1(Carbamidomethyl)	0	326177167	3.23939	2	1660.75	1.31802	32.2594	0
	High	AGYAAGVAcDSGTNNAEcK	1	34	34	unk	C9(Carbamidomethyl); C18(Carbamidomethyl)	0	4.48713e+06	3.11801	2	1915.79	1.82269	23.8562	0
unk	len=1024 - [Mii61805_c3_g7_i1_4]	25.6963	13.49	1	0	3	8	1.55533e+08	341	36.7955	7.1958
	A2	Sequence	# PSMs	# Proteins	# Protein Groups	Protein Group Accessions	Modifications	ΔCn	Area	XCorr	Charge	MH+ [Da]	ΔM [ppm]	RT [min]	# Missed Cleavages
	High	VYRDIVNAVSTK	5	34	34	unk		0	1.35934e+08	3.90969	3	1364.75	0.766314	28.9266	1
	High	cTIEPAYTSGDAFTK	2	34	34	unk	C1(Carbamidomethyl)	0	326177167	3.23939	2	1660.75	1.31802	32.2594	0
	High	AGYAAGVAcDSGTNNAEcK	1	34	34	unk	C9(Carbamidomethyl); C18(Carbamidomethyl)	0	4.48713e+06	3.11801	2	1915.79	1.82269	23.8562	0
unk	len=1021 - [Mii61805_c3_g8_i1_4]	25.6963	13.53	1	0	3	8	1.55533e+08	340	36.7005	6.96143
	A2	Sequence	# PSMs	# Proteins	# Protein Groups	Protein Group Accessions	Modifications	ΔCn	Area	XCorr	Charge	MH+ [Da]	ΔM [ppm]	RT [min]	# Missed Cleavages
	High	VYRDIVNAVSTK	5	34	34	unk		0	1.35934e+08	3.90969	3	1364.75	0.766314	28.9266	1
	High	cTIEPAYTSGDAFTK	2	34	34	unk	C1(Carbamidomethyl)	0	326177167	3.23939	2	1660.75	1.31802	32.2594	0
	High	AGYAAGVAcDSGTNNAEcK	1	34	34	unk	C9(Carbamidomethyl); C18(Carbamidomethyl)	0	4.48713e+06	3.11801	2	1915.79	1.82269	23.8562	0
unk	len=1021 - [Mii61805_c3_g9_i1_4]	25.6963	13.53	1	0	3	8	1.55533e+08	340	36.6014	6.72705
	A2	Sequence	# PSMs	# Proteins	# Protein Groups	Protein Group Accessions	Modifications	ΔCn	Area	XCorr	Charge	MH+ [Da]	ΔM [ppm]	RT [min]	# Missed Cleavages
	High	VYRDIVNAVSTK	5	34	34	unk		0	1.35934e+08	3.90969	3	1364.75	0.766314	28.9266	1
	High	cTIEPAYTSGDAFTK	2	34	34	unk	C1(Carbamidomethyl)	0	326177167	3.23939	2	1660.75	1.31802	32.2594	0
	High	AGYAAGVAcDSGTNNAEcK	1	34	34	unk	C9(Carbamidomethyl); C18(Carbamidomethyl)	0	4.48713e+06	3.11801	2	1915.79	1.82269	23.8562	0
unk	len=1024 - [Mii61805_c3_g10_i1_4]	25.6963	13.49	1	0	3	8	1.55533e+08	341	36.7965	6.96143
	A2	Sequence	# PSMs	# Proteins	# Protein Groups	Protein Group Accessions	Modifications	ΔCn	Area	XCorr	Charge	MH+ [Da]	ΔM [ppm]	RT [min]	# Missed Cleavages
	High	VYRDIVNAVSTK	5	34	34	unk		0	1.35934e+08	3.90969	3	1364.75	0.766314	28.9266	1
	High	cTIEPAYTSGDAFTK	2	34	34	unk	C1(Carbamidomethyl)	0	326177167	3.23939	2	1660.75	1.31802	32.2594	0
	High	AGYAAGVAcDSGTNNAEcK	1	34	34	unk	C9(Carbamidomethyl); C18(Carbamidomethyl)	0	4.48713e+06	3.11801	2	1915.79	1.82269	23.8562	0
unk	len=1039 - [Mii61805_c3_g11_i1_4]	25.6963	13.29	1	0	3	8	1.55533e+08	346	37.4088	7.1958
	A2	Sequence	# PSMs	# Proteins	# Protein Groups	Protein Group Accessions	Modifications	ΔCn	Area	XCorr	Charge	MH+ [Da]	ΔM [ppm]	RT [min]	# Missed Cleavages
	High	VYRDIVNAVSTK	5	34	34	unk		0	1.35934e+08	3.90969	3	1364.75	0.766314	28.9266	1
	High	cTIEPAYTSGDAFTK	2	34	34	unk	C1(Carbamidomethyl)	0	326177167	3.23939	2	1660.75	1.31802	32.2594	0
	High	AGYAAGVAcDSGTNNAEcK	1	34	34	unk	C9(Carbamidomethyl); C18(Carbamidomethyl)	0	4.48713e+06	3.11801	2	1915.79	1.82269	23.8562	0
unk	len=1021 - [Mii61805_c3_g12_i1_4]	25.6963	13.53	1	0	3	8	1.55533e+08	340	36.5974	6.96143
	A2	Sequence	# PSMs	# Proteins	# Protein Groups	Protein Group Accessions	Modifications	ΔCn	Area	XCorr	Charge	MH+ [Da]	ΔM [ppm]	RT [min]	# Missed Cleavages
	High	VYRDIVNAVSTK	5	34	34	unk		0	1.35934e+08	3.90969	3	1364.75	0.766314	28.9266	1
	High	cTIEPAYTSGDAFTK	2	34	34	unk	C1(Carbamidomethyl)	0	326177167	3.23939	2	1660.75	1.31802	32.2594	0
	High	AGYAAGVAcDSGTNNAEcK	1	34	34	unk	C9(Carbamidomethyl); C18(Carbamidomethyl)	0	4.48713e+06	3.11801	2	1915.79	1.82269	23.8562	0
unk	len=1015 - [Mii61805_c3_g13_i1_4]	25.6963	13.61	1	0	3	8	1.55533e+08	338	36.4674	6.96143
	A2	Sequence	# PSMs	# Proteins	# Protein Groups	Protein Group Accessions	Modifications	ΔCn	Area	XCorr	Charge	MH+ [Da]	ΔM [ppm]	RT [min]	# Missed Cleavages
	High	VYRDIVNAVSTK	5	34	34	unk		0	1.35934e+08	3.90969	3	1364.75	0.766314	28.9266	1
	High	cTIEPAYTSGDAFTK	2	34	34	unk	C1(Carbamidomethyl)	0	326177167	3.23939	2	1660.75	1.31802	32.2594	0
	High	AGYAAGVAcDSGTNNAEcK	1	34	34	unk	C9(Carbamidomethyl); C18(Carbamidomethyl)	0	4.48713e+06	3.11801	2	1915.79	1.82269	23.8562	0
unk	len=1024 - [Mii61805_c3_g14_i1_4]	25.6963	13.49	1	0	3	8	1.55533e+08	341	36.8376	7.1958
	A2	Sequence	# PSMs	# Proteins	# Protein Groups	Protein Group Accessions	Modifications	ΔCn	Area	XCorr	Charge	MH+ [Da]	ΔM [ppm]	RT [min]	# Missed Cleavages
	High	VYRDIVNAVSTK	5	34	34	unk		0	1.35934e+08	3.90969	3	1364.75	0.766314	28.9266	1
	High	cTIEPAYTSGDAFTK	2	34	34	unk	C1(Carbamidomethyl)	0	326177167	3.23939	2	1660.75	1.31802	32.2594	0
	High	AGYAAGVAcDSGTNNAEcK	1	34	34	unk	C9(Carbamidomethyl); C18(Carbamidomethyl)	0	4.48713e+06	3.11801	2	1915.79	1.82269	23.8562	0
unk	len=1021 - [Mii61805_c3_g16_i1_4]	25.6963	13.53	1	0	3	8	1.55533e+08	340	36.6294	6.72705
	A2	Sequence	# PSMs	# Proteins	# Protein Groups	Protein Group Accessions	Modifications	ΔCn	Area	XCorr	Charge	MH+ [Da]	ΔM [ppm]	RT [min]	# Missed Cleavages
	High	VYRDIVNAVSTK	5	34	34	unk		0	1.35934e+08	3.90969	3	1364.75	0.766314	28.9266	1
	High	cTIEPAYTSGDAFTK	2	34	34	unk	C1(Carbamidomethyl)	0	326177167	3.23939	2	1660.75	1.31802	32.2594	0
	High	AGYAAGVAcDSGTNNAEcK	1	34	34	unk	C9(Carbamidomethyl); C18(Carbamidomethyl)	0	4.48713e+06	3.11801	2	1915.79	1.82269	23.8562	0
unk	len=1021 - [Mii61805_c3_g17_i1_4]	25.6963	13.53	1	0	3	8	1.55533e+08	340	36.7015	6.96143
	A2	Sequence	# PSMs	# Proteins	# Protein Groups	Protein Group Accessions	Modifications	ΔCn	Area	XCorr	Charge	MH+ [Da]	ΔM [ppm]	RT [min]	# Missed Cleavages
	High	VYRDIVNAVSTK	5	34	34	unk		0	1.35934e+08	3.90969	3	1364.75	0.766314	28.9266	1
	High	cTIEPAYTSGDAFTK	2	34	34	unk	C1(Carbamidomethyl)	0	326177167	3.23939	2	1660.75	1.31802	32.2594	0
	High	AGYAAGVAcDSGTNNAEcK	1	34	34	unk	C9(Carbamidomethyl); C18(Carbamidomethyl)	0	4.48713e+06	3.11801	2	1915.79	1.82269	23.8562	0
unk	len=1021 - [Mii61805_c3_g19_i1_4]	25.6963	13.53	1	0	3	8	1.55533e+08	340	36.6254	6.96143
	A2	Sequence	# PSMs	# Proteins	# Protein Groups	Protein Group Accessions	Modifications	ΔCn	Area	XCorr	Charge	MH+ [Da]	ΔM [ppm]	RT [min]	# Missed Cleavages
	High	VYRDIVNAVSTK	5	34	34	unk		0	1.35934e+08	3.90969	3	1364.75	0.766314	28.9266	1
	High	cTIEPAYTSGDAFTK	2	34	34	unk	C1(Carbamidomethyl)	0	326177167	3.23939	2	1660.75	1.31802	32.2594	0
	High	AGYAAGVAcDSGTNNAEcK	1	34	34	unk	C9(Carbamidomethyl); C18(Carbamidomethyl)	0	4.48713e+06	3.11801	2	1915.79	1.82269	23.8562	0
unk	len=1021 - [Mii61805_c3_g20_i1_4]	25.6963	13.53	1	0	3	8	1.55533e+08	340	36.6714	6.72705
	A2	Sequence	# PSMs	# Proteins	# Protein Groups	Protein Group Accessions	Modifications	ΔCn	Area	XCorr	Charge	MH+ [Da]	ΔM [ppm]	RT [min]	# Missed Cleavages
	High	VYRDIVNAVSTK	5	34	34	unk		0	1.35934e+08	3.90969	3	1364.75	0.766314	28.9266	1
	High	cTIEPAYTSGDAFTK	2	34	34	unk	C1(Carbamidomethyl)	0	326177167	3.23939	2	1660.75	1.31802	32.2594	0
	High	AGYAAGVAcDSGTNNAEcK	1	34	34	unk	C9(Carbamidomethyl); C18(Carbamidomethyl)	0	4.48713e+06	3.11801	2	1915.79	1.82269	23.8562	0
unk	len=1024 - [Mii61805_c3_g21_i1_4]	25.6963	13.49	1	0	3	8	1.55533e+08	341	36.8396	7.1958
	A2	Sequence	# PSMs	# Proteins	# Protein Groups	Protein Group Accessions	Modifications	ΔCn	Area	XCorr	Charge	MH+ [Da]	ΔM [ppm]	RT [min]	# Missed Cleavages
	High	VYRDIVNAVSTK	5	34	34	unk		0	1.35934e+08	3.90969	3	1364.75	0.766314	28.9266	1
	High	cTIEPAYTSGDAFTK	2	34	34	unk	C1(Carbamidomethyl)	0	326177167	3.23939	2	1660.75	1.31802	32.2594	0
	High	AGYAAGVAcDSGTNNAEcK	1	34	34	unk	C9(Carbamidomethyl); C18(Carbamidomethyl)	0	4.48713e+06	3.11801	2	1915.79	1.82269	23.8562	0
unk	len=1021 - [Mii61805_c3_g22_i1_4]	25.6963	13.53	1	0	3	8	1.55533e+08	340	36.6705	6.96143
	A2	Sequence	# PSMs	# Proteins	# Protein Groups	Protein Group Accessions	Modifications	ΔCn	Area	XCorr	Charge	MH+ [Da]	ΔM [ppm]	RT [min]	# Missed Cleavages
	High	VYRDIVNAVSTK	5	34	34	unk		0	1.35934e+08	3.90969	3	1364.75	0.766314	28.9266	1
	High	cTIEPAYTSGDAFTK	2	34	34	unk	C1(Carbamidomethyl)	0	326177167	3.23939	2	1660.75	1.31802	32.2594	0
	High	AGYAAGVAcDSGTNNAEcK	1	34	34	unk	C9(Carbamidomethyl); C18(Carbamidomethyl)	0	4.48713e+06	3.11801	2	1915.79	1.82269	23.8562	0
unk	len=987 - [Mii61805_c3_g23_i1_6]	25.6963	14.02	1	0	3	8	1.55533e+08	328	35.2687	6.96143
	A2	Sequence	# PSMs	# Proteins	# Protein Groups	Protein Group Accessions	Modifications	ΔCn	Area	XCorr	Charge	MH+ [Da]	ΔM [ppm]	RT [min]	# Missed Cleavages
	High	VYRDIVNAVSTK	5	34	34	unk		0	1.35934e+08	3.90969	3	1364.75	0.766314	28.9266	1
	High	cTIEPAYTSGDAFTK	2	34	34	unk	C1(Carbamidomethyl)	0	326177167	3.23939	2	1660.75	1.31802	32.2594	0
	High	AGYAAGVAcDSGTNNAEcK	1	34	34	unk	C9(Carbamidomethyl); C18(Carbamidomethyl)	0	4.48713e+06	3.11801	2	1915.79	1.82269	23.8562	0
unk	len=1034 - [Mii61805_c3_g24_i1_5]	25.6963	13.37	1	0	3	8	1.55533e+08	344	37.1527	7.1958
	A2	Sequence	# PSMs	# Proteins	# Protein Groups	Protein Group Accessions	Modifications	ΔCn	Area	XCorr	Charge	MH+ [Da]	ΔM [ppm]	RT [min]	# Missed Cleavages
	High	VYRDIVNAVSTK	5	34	34	unk		0	1.35934e+08	3.90969	3	1364.75	0.766314	28.9266	1
	High	cTIEPAYTSGDAFTK	2	34	34	unk	C1(Carbamidomethyl)	0	326177167	3.23939	2	1660.75	1.31802	32.2594	0
	High	AGYAAGVAcDSGTNNAEcK	1	34	34	unk	C9(Carbamidomethyl); C18(Carbamidomethyl)	0	4.48713e+06	3.11801	2	1915.79	1.82269	23.8562	0
unk	len=1021 - [Mii61805_c3_g27_i1_4]	25.6963	13.53	1	0	3	8	1.55533e+08	340	36.6024	6.72705
	A2	Sequence	# PSMs	# Proteins	# Protein Groups	Protein Group Accessions	Modifications	ΔCn	Area	XCorr	Charge	MH+ [Da]	ΔM [ppm]	RT [min]	# Missed Cleavages
	High	VYRDIVNAVSTK	5	34	34	unk		0	1.35934e+08	3.90969	3	1364.75	0.766314	28.9266	1
	High	cTIEPAYTSGDAFTK	2	34	34	unk	C1(Carbamidomethyl)	0	326177167	3.23939	2	1660.75	1.31802	32.2594	0
	High	AGYAAGVAcDSGTNNAEcK	1	34	34	unk	C9(Carbamidomethyl); C18(Carbamidomethyl)	0	4.48713e+06	3.11801	2	1915.79	1.82269	23.8562	0
unk	len=1034 - [Mii61805_c3_g29_i1_5]	25.6963	13.37	1	0	3	8	1.55533e+08	344	37.1817	7.41553
	A2	Sequence	# PSMs	# Proteins	# Protein Groups	Protein Group Accessions	Modifications	ΔCn	Area	XCorr	Charge	MH+ [Da]	ΔM [ppm]	RT [min]	# Missed Cleavages
	High	VYRDIVNAVSTK	5	34	34	unk		0	1.35934e+08	3.90969	3	1364.75	0.766314	28.9266	1
	High	cTIEPAYTSGDAFTK	2	34	34	unk	C1(Carbamidomethyl)	0	326177167	3.23939	2	1660.75	1.31802	32.2594	0
	High	AGYAAGVAcDSGTNNAEcK	1	34	34	unk	C9(Carbamidomethyl); C18(Carbamidomethyl)	0	4.48713e+06	3.11801	2	1915.79	1.82269	23.8562	0
unk	len=1021 - [Mii61805_c3_g31_i1_4]	25.6963	13.53	1	0	3	8	1.55533e+08	340	36.7285	6.96143
	A2	Sequence	# PSMs	# Proteins	# Protein Groups	Protein Group Accessions	Modifications	ΔCn	Area	XCorr	Charge	MH+ [Da]	ΔM [ppm]	RT [min]	# Missed Cleavages
	High	VYRDIVNAVSTK	5	34	34	unk		0	1.35934e+08	3.90969	3	1364.75	0.766314	28.9266	1
	High	cTIEPAYTSGDAFTK	2	34	34	unk	C1(Carbamidomethyl)	0	326177167	3.23939	2	1660.75	1.31802	32.2594	0
	High	AGYAAGVAcDSGTNNAEcK	1	34	34	unk	C9(Carbamidomethyl); C18(Carbamidomethyl)	0	4.48713e+06	3.11801	2	1915.79	1.82269	23.8562	0
unk	len=1034 - [Mii61805_c3_g32_i1_5]	25.6963	13.37	1	0	3	8	1.55533e+08	344	37.2097	7.41553
	A2	Sequence	# PSMs	# Proteins	# Protein Groups	Protein Group Accessions	Modifications	ΔCn	Area	XCorr	Charge	MH+ [Da]	ΔM [ppm]	RT [min]	# Missed Cleavages
	High	VYRDIVNAVSTK	5	34	34	unk		0	1.35934e+08	3.90969	3	1364.75	0.766314	28.9266	1
	High	cTIEPAYTSGDAFTK	2	34	34	unk	C1(Carbamidomethyl)	0	326177167	3.23939	2	1660.75	1.31802	32.2594	0
	High	AGYAAGVAcDSGTNNAEcK	1	34	34	unk	C9(Carbamidomethyl); C18(Carbamidomethyl)	0	4.48713e+06	3.11801	2	1915.79	1.82269	23.8562	0
unk	len=1024 - [Mii61805_c3_g33_i1_4]	25.6963	13.49	1	0	3	8	1.55533e+08	341	36.8105	6.96143
	A2	Sequence	# PSMs	# Proteins	# Protein Groups	Protein Group Accessions	Modifications	ΔCn	Area	XCorr	Charge	MH+ [Da]	ΔM [ppm]	RT [min]	# Missed Cleavages
	High	VYRDIVNAVSTK	5	34	34	unk		0	1.35934e+08	3.90969	3	1364.75	0.766314	28.9266	1
	High	cTIEPAYTSGDAFTK	2	34	34	unk	C1(Carbamidomethyl)	0	326177167	3.23939	2	1660.75	1.31802	32.2594	0
	High	AGYAAGVAcDSGTNNAEcK	1	34	34	unk	C9(Carbamidomethyl); C18(Carbamidomethyl)	0	4.48713e+06	3.11801	2	1915.79	1.82269	23.8562	0
unk	len=1039 - [Mii61805_c3_g36_i1_4]	25.6963	13.29	1	0	3	8	1.55533e+08	346	37.4388	7.1958
	A2	Sequence	# PSMs	# Proteins	# Protein Groups	Protein Group Accessions	Modifications	ΔCn	Area	XCorr	Charge	MH+ [Da]	ΔM [ppm]	RT [min]	# Missed Cleavages
	High	VYRDIVNAVSTK	5	34	34	unk		0	1.35934e+08	3.90969	3	1364.75	0.766314	28.9266	1
	High	cTIEPAYTSGDAFTK	2	34	34	unk	C1(Carbamidomethyl)	0	326177167	3.23939	2	1660.75	1.31802	32.2594	0
	High	AGYAAGVAcDSGTNNAEcK	1	34	34	unk	C9(Carbamidomethyl); C18(Carbamidomethyl)	0	4.48713e+06	3.11801	2	1915.79	1.82269	23.8562	0
unk	len=1039 - [Mii61805_c3_g37_i1_4]	25.6963	13.29	1	0	3	8	1.55533e+08	346	37.4668	7.1958
	A2	Sequence	# PSMs	# Proteins	# Protein Groups	Protein Group Accessions	Modifications	ΔCn	Area	XCorr	Charge	MH+ [Da]	ΔM [ppm]	RT [min]	# Missed Cleavages
	High	VYRDIVNAVSTK	5	34	34	unk		0	1.35934e+08	3.90969	3	1364.75	0.766314	28.9266	1
	High	cTIEPAYTSGDAFTK	2	34	34	unk	C1(Carbamidomethyl)	0	326177167	3.23939	2	1660.75	1.31802	32.2594	0
	High	AGYAAGVAcDSGTNNAEcK	1	34	34	unk	C9(Carbamidomethyl); C18(Carbamidomethyl)	0	4.48713e+06	3.11801	2	1915.79	1.82269	23.8562	0
unk	len=1034 - [Mii61805_c3_g38_i1_5]	25.6963	13.37	1	0	3	8	1.55533e+08	344	37.1827	7.41553
	A2	Sequence	# PSMs	# Proteins	# Protein Groups	Protein Group Accessions	Modifications	ΔCn	Area	XCorr	Charge	MH+ [Da]	ΔM [ppm]	RT [min]	# Missed Cleavages
	High	VYRDIVNAVSTK	5	34	34	unk		0	1.35934e+08	3.90969	3	1364.75	0.766314	28.9266	1
	High	cTIEPAYTSGDAFTK	2	34	34	unk	C1(Carbamidomethyl)	0	326177167	3.23939	2	1660.75	1.31802	32.2594	0
	High	AGYAAGVAcDSGTNNAEcK	1	34	34	unk	C9(Carbamidomethyl); C18(Carbamidomethyl)	0	4.48713e+06	3.11801	2	1915.79	1.82269	23.8562	0
unk	len=1024 - [Mii61805_c3_g39_i1_4]	25.6963	13.49	1	0	3	8	1.55533e+08	341	36.8406	7.1958
	A2	Sequence	# PSMs	# Proteins	# Protein Groups	Protein Group Accessions	Modifications	ΔCn	Area	XCorr	Charge	MH+ [Da]	ΔM [ppm]	RT [min]	# Missed Cleavages
	High	VYRDIVNAVSTK	5	34	34	unk		0	1.35934e+08	3.90969	3	1364.75	0.766314	28.9266	1
	High	cTIEPAYTSGDAFTK	2	34	34	unk	C1(Carbamidomethyl)	0	326177167	3.23939	2	1660.75	1.31802	32.2594	0
	High	AGYAAGVAcDSGTNNAEcK	1	34	34	unk	C9(Carbamidomethyl); C18(Carbamidomethyl)	0	4.48713e+06	3.11801	2	1915.79	1.82269	23.8562	0
unk	len=1024 - [Mii61805_c3_g45_i1_4]	25.6963	13.49	1	0	3	8	1.55533e+08	341	36.8236	7.1958
	A2	Sequence	# PSMs	# Proteins	# Protein Groups	Protein Group Accessions	Modifications	ΔCn	Area	XCorr	Charge	MH+ [Da]	ΔM [ppm]	RT [min]	# Missed Cleavages
	High	VYRDIVNAVSTK	5	34	34	unk		0	1.35934e+08	3.90969	3	1364.75	0.766314	28.9266	1
	High	cTIEPAYTSGDAFTK	2	34	34	unk	C1(Carbamidomethyl)	0	326177167	3.23939	2	1660.75	1.31802	32.2594	0
	High	AGYAAGVAcDSGTNNAEcK	1	34	34	unk	C9(Carbamidomethyl); C18(Carbamidomethyl)	0	4.48713e+06	3.11801	2	1915.79	1.82269	23.8562	0
unk	len=1034 - [Mii61805_c3_g46_i1_5]	25.6963	13.37	1	0	3	8	1.55533e+08	344	37.1797	7.41553
	A2	Sequence	# PSMs	# Proteins	# Protein Groups	Protein Group Accessions	Modifications	ΔCn	Area	XCorr	Charge	MH+ [Da]	ΔM [ppm]	RT [min]	# Missed Cleavages
	High	VYRDIVNAVSTK	5	34	34	unk		0	1.35934e+08	3.90969	3	1364.75	0.766314	28.9266	1
	High	cTIEPAYTSGDAFTK	2	34	34	unk	C1(Carbamidomethyl)	0	326177167	3.23939	2	1660.75	1.31802	32.2594	0
	High	AGYAAGVAcDSGTNNAEcK	1	34	34	unk	C9(Carbamidomethyl); C18(Carbamidomethyl)	0	4.48713e+06	3.11801	2	1915.79	1.82269	23.8562	0
unk	len=913 - [Mii65436_c1_g1_i1_2]	25.6963	15.13	1	0	3	8	1.55533e+08	304	32.3014	7.1958
	A2	Sequence	# PSMs	# Proteins	# Protein Groups	Protein Group Accessions	Modifications	ΔCn	Area	XCorr	Charge	MH+ [Da]	ΔM [ppm]	RT [min]	# Missed Cleavages
	High	VYRDIVNAVSTK	5	34	34	unk		0	1.35934e+08	3.90969	3	1364.75	0.766314	28.9266	1
	High	cTIEPAYTSGDAFTK	2	34	34	unk	C1(Carbamidomethyl)	0	326177167	3.23939	2	1660.75	1.31802	32.2594	0
	High	AGYAAGVAcDSGTNNAEcK	1	34	34	unk	C9(Carbamidomethyl); C18(Carbamidomethyl)	0	4.48713e+06	3.11801	2	1915.79	1.82269	23.8562	0
unk	len=309 - [Mii66946_c0_g2_i1_5]	15.3887	19.61	1	0	3	5	1.49554e+08	102	10.7264	4.61475
	A2	Sequence	# PSMs	# Proteins	# Protein Groups	Protein Group Accessions	Modifications	ΔCn	Area	XCorr	Charge	MH+ [Da]	ΔM [ppm]	RT [min]	# Missed Cleavages
	High	TDLIPKDNVDISFPNNPERK	2	2	2	unk		0	2.3478e+08	3.66152	3	2312.19	2.24126	35.6669	2
	High	TDLIPKDNVDISFPNNPER	1	2	2	unk		0	161180737	3.21347	3	2184.1	3.9932	37.4654	1
	High	DNVDISFPNNPER	2	4	4	unk		0	52701553	2.93204	2	1516.71	2.0616	33.5217	0
unk	len=229 - [Mii66946_c0_g2_i2_5]	15.3887	26.32	1	0	3	5	1.49554e+08	76	8.40621	4.61475
	A2	Sequence	# PSMs	# Proteins	# Protein Groups	Protein Group Accessions	Modifications	ΔCn	Area	XCorr	Charge	MH+ [Da]	ΔM [ppm]	RT [min]	# Missed Cleavages
	High	TDLIPKDNVDISFPNNPERK	2	2	2	unk		0	2.3478e+08	3.66152	3	2312.19	2.24126	35.6669	2
	High	TDLIPKDNVDISFPNNPER	1	2	2	unk		0	161180737	3.21347	3	2184.1	3.9932	37.4654	1
	High	DNVDISFPNNPER	2	4	4	unk		0	52701553	2.93204	2	1516.71	2.0616	33.5217	0
unk	len=657 - [Mii70376_c0_g1_i1_2]	9.55606	9.13	1	0	3	3	1.05691e+08	219	23.3308	4.51318
	A2	Sequence	# PSMs	# Proteins	# Protein Groups	Protein Group Accessions	Modifications	ΔCn	Area	XCorr	Charge	MH+ [Da]	ΔM [ppm]	RT [min]	# Missed Cleavages
	High	TDLIPKDNIDISFPNNPER	1	2	2	unk		0	75166562	3.74963	3	2198.11	1.12414	39.0458	1
	High	TDLIPKDNIDISFPNNPERK	1	2	2	unk		0	143175340	2.92553	4	2326.21	1.10923	36.9914	2
	High	DNIDISFPNNPERK	1	2	2	unk		0	9.87312e+07	2.88091	3	1658.82	2.00941	32.9889	1
unk	len=650 - [Mii70376_c0_g1_i2_1]	9.55606	9.22	1	0	3	3	1.05691e+08	217	23.1206	4.4624
	A2	Sequence	# PSMs	# Proteins	# Protein Groups	Protein Group Accessions	Modifications	ΔCn	Area	XCorr	Charge	MH+ [Da]	ΔM [ppm]	RT [min]	# Missed Cleavages
	High	TDLIPKDNIDISFPNNPER	1	2	2	unk		0	75166562	3.74963	3	2198.11	1.12414	39.0458	1
	High	TDLIPKDNIDISFPNNPERK	1	2	2	unk		0	143175340	2.92553	4	2326.21	1.10923	36.9914	2
	High	DNIDISFPNNPERK	1	2	2	unk		0	9.87312e+07	2.88091	3	1658.82	2.00941	32.9889	1
unk	len=722 - [Mii59191_c0_g1_i1_4]	5.62133	5.42	1	0	1	2	52701553	240	27.4797	8.35303
	A2	Sequence	# PSMs	# Proteins	# Protein Groups	Protein Group Accessions	Modifications	ΔCn	Area	XCorr	Charge	MH+ [Da]	ΔM [ppm]	RT [min]	# Missed Cleavages
	High	DNVDISFPNNPER	2	4	4	unk		0	52701553	2.93204	2	1516.71	2.0616	33.5217	0
unk	len=804 - [Mii59191_c0_g2_i1_4]	5.62133	4.85	1	0	1	2	52701553	268	31.3165	8.67529
	A2	Sequence	# PSMs	# Proteins	# Protein Groups	Protein Group Accessions	Modifications	ΔCn	Area	XCorr	Charge	MH+ [Da]	ΔM [ppm]	RT [min]	# Missed Cleavages
	High	DNVDISFPNNPER	2	4	4	unk		0	52701553	2.93204	2	1516.71	2.0616	33.5217	0
unk	len=1554 - [Mii60785_c0_g1_i2_4]	5.57811	6.18	1	0	2	2	7.89907e+07	518	57.8397	6.0874
	A2	Sequence	# PSMs	# Proteins	# Protein Groups	Protein Group Accessions	Modifications	ΔCn	Area	XCorr	Charge	MH+ [Da]	ΔM [ppm]	RT [min]	# Missed Cleavages
	High	NLDIERPTYTNLNR	1	31	31	unk		0	1.29257e+08	3.49904	3	1718.88	1.68806	31.6432	0
	High	VGINYQPPTVVPGGDLAK	1	39	39	unk		0	28724221	2.07907	2	1824.99	1.27632	37.0929	0
unk	len=1387 - [Mii61472_c0_g1_i1_5]	5.57811	6.93	1	0	2	2	7.89907e+07	462	51.7669	6.75635
	A2	Sequence	# PSMs	# Proteins	# Protein Groups	Protein Group Accessions	Modifications	ΔCn	Area	XCorr	Charge	MH+ [Da]	ΔM [ppm]	RT [min]	# Missed Cleavages
	High	NLDIERPTYTNINR	1	31	31	unk		0	1.29257e+08	3.49904	3	1718.88	1.68806	31.6432	0
	High	VGLNYQPPTVVPGGDLAK	1	39	39	unk		0	28724221	2.07907	2	1824.99	1.27632	37.0929	0
unk	len=1953 - [Mii65146_c0_g1_i1_6]	5.57811	4.92	1	0	2	2	7.89907e+07	651	73.7673	5.46533
	A2	Sequence	# PSMs	# Proteins	# Protein Groups	Protein Group Accessions	Modifications	ΔCn	Area	XCorr	Charge	MH+ [Da]	ΔM [ppm]	RT [min]	# Missed Cleavages
	High	NLDIERPTYTNLNR	1	31	31	unk		0	1.29257e+08	3.49904	3	1718.88	1.68806	31.6432	0
	High	VGINYQPPTVVPGGDLAK	1	39	39	unk		0	28724221	2.07907	2	1824.99	1.27632	37.0929	0
unk	len=1711 - [Mii68344_c0_g2_i1_5]	5.57811	5.61	1	0	2	2	7.89907e+07	570	63.9528	5.90967
	A2	Sequence	# PSMs	# Proteins	# Protein Groups	Protein Group Accessions	Modifications	ΔCn	Area	XCorr	Charge	MH+ [Da]	ΔM [ppm]	RT [min]	# Missed Cleavages
	High	NLDIERPTYTNLNR	1	31	31	unk		0	1.29257e+08	3.49904	3	1718.88	1.68806	31.6432	0
	High	VGINYQPPTVVPGGDLAK	1	39	39	unk		0	28724221	2.07907	2	1824.99	1.27632	37.0929	0
unk	len=1867 - [Mii70140_c0_g1_i1_5]	5.57811	5.14	1	0	2	2	7.89907e+07	622	70.1276	5.41455
	A2	Sequence	# PSMs	# Proteins	# Protein Groups	Protein Group Accessions	Modifications	ΔCn	Area	XCorr	Charge	MH+ [Da]	ΔM [ppm]	RT [min]	# Missed Cleavages
	High	NLDIERPTYTNLNR	1	31	31	unk		0	1.29257e+08	3.49904	3	1718.88	1.68806	31.6432	0
	High	VGLNYQPPTVVPGGDLAK	1	39	39	unk		0	28724221	2.07907	2	1824.99	1.27632	37.0929	0
unk	len=1764 - [Mii70627_c0_g1_i1_1]	5.57811	5.44	1	0	2	2	7.89907e+07	588	66.3606	5.2876
	A2	Sequence	# PSMs	# Proteins	# Protein Groups	Protein Group Accessions	Modifications	ΔCn	Area	XCorr	Charge	MH+ [Da]	ΔM [ppm]	RT [min]	# Missed Cleavages
	High	NLDIERPTYTNLNR	1	31	31	unk		0	1.29257e+08	3.49904	3	1718.88	1.68806	31.6432	0
	High	VGLNYQPPTVVPGGDLAK	1	39	39	unk		0	28724221	2.07907	2	1824.99	1.27632	37.0929	0
unk	len=1715 - [Mii70920_c2_g1_i1_3]	5.57811	5.6	1	0	2	2	7.89907e+07	571	64.2543	5.2876
	A2	Sequence	# PSMs	# Proteins	# Protein Groups	Protein Group Accessions	Modifications	ΔCn	Area	XCorr	Charge	MH+ [Da]	ΔM [ppm]	RT [min]	# Missed Cleavages
	High	NLDIERPTYTNLNR	1	31	31	unk		0	1.29257e+08	3.49904	3	1718.88	1.68806	31.6432	0
	High	VGINYQPPTVVPGGDLAK	1	39	39	unk		0	28724221	2.07907	2	1824.99	1.27632	37.0929	0
unk	len=1222 - [Mii72538_c1_g2_i1_1]	5.57811	7.86	1	0	2	2	7.89907e+07	407	46.0158	6.1001
	A2	Sequence	# PSMs	# Proteins	# Protein Groups	Protein Group Accessions	Modifications	ΔCn	Area	XCorr	Charge	MH+ [Da]	ΔM [ppm]	RT [min]	# Missed Cleavages
	High	NLDIERPTYTNLNR	1	31	31	unk		0	1.29257e+08	3.49904	3	1718.88	1.68806	31.6432	0
	High	VGINYQPPTVVPGGDLAK	1	39	39	unk		0	28724221	2.07907	2	1824.99	1.27632	37.0929	0
unk	len=1442 - [Mii72538_c2_g2_i1_2]	5.57811	6.67	1	0	2	2	7.89907e+07	480	53.2771	5.26221
	A2	Sequence	# PSMs	# Proteins	# Protein Groups	Protein Group Accessions	Modifications	ΔCn	Area	XCorr	Charge	MH+ [Da]	ΔM [ppm]	RT [min]	# Missed Cleavages
	High	NLDIERPTYTNLNR	1	31	31	unk		0	1.29257e+08	3.49904	3	1718.88	1.68806	31.6432	0
	High	VGINYQPPTVVPGGDLAK	1	39	39	unk		0	28724221	2.07907	2	1824.99	1.27632	37.0929	0
unk	len=1542 - [Mii72538_c2_g2_i2_2]	5.57811	6.24	1	0	2	2	7.89907e+07	513	57.4653	5.35107
	A2	Sequence	# PSMs	# Proteins	# Protein Groups	Protein Group Accessions	Modifications	ΔCn	Area	XCorr	Charge	MH+ [Da]	ΔM [ppm]	RT [min]	# Missed Cleavages
	High	NLDIERPTYTNLNR	1	31	31	unk		0	1.29257e+08	3.49904	3	1718.88	1.68806	31.6432	0
	High	VGINYQPPTVVPGGDLAK	1	39	39	unk		0	28724221	2.07907	2	1824.99	1.27632	37.0929	0
unk	len=1550 - [Mii72538_c2_g2_i4_1]	5.57811	6.2	1	0	2	2	7.89907e+07	516	57.7604	5.33838
	A2	Sequence	# PSMs	# Proteins	# Protein Groups	Protein Group Accessions	Modifications	ΔCn	Area	XCorr	Charge	MH+ [Da]	ΔM [ppm]	RT [min]	# Missed Cleavages
	High	NLDIERPTYTNLNR	1	31	31	unk		0	1.29257e+08	3.49904	3	1718.88	1.68806	31.6432	0
	High	VGINYQPPTVVPGGDLAK	1	39	39	unk		0	28724221	2.07907	2	1824.99	1.27632	37.0929	0
unk	len=1271 - [Mii72538_c2_g3_i1_1]	5.57811	7.55	1	0	2	2	7.89907e+07	424	47.2576	6.16357
	A2	Sequence	# PSMs	# Proteins	# Protein Groups	Protein Group Accessions	Modifications	ΔCn	Area	XCorr	Charge	MH+ [Da]	ΔM [ppm]	RT [min]	# Missed Cleavages
	High	NLDIERPTYTNLNR	1	31	31	unk		0	1.29257e+08	3.49904	3	1718.88	1.68806	31.6432	0
	High	VGLNYQPPTVVPGGDLAK	1	39	39	unk		0	28724221	2.07907	2	1824.99	1.27632	37.0929	0
unk	len=5750 - [Mii78597_c0_g1_i2_6]	4.29056	0.52	1	0	1	2	5.70714e+07	1917	212.285	5.18604
	A2	Sequence	# PSMs	# Proteins	# Protein Groups	Protein Group Accessions	Modifications	ΔCn	Area	XCorr	Charge	MH+ [Da]	ΔM [ppm]	RT [min]	# Missed Cleavages
	High	NQVFLESVPK	2	3	3	unk		0	5.70714e+07	2.24145	2	1160.63	1.55846	33.8356	0
unk	len=5771 - [Mii78597_c0_g1_i3_6]	4.29056	0.52	1	0	1	2	5.70714e+07	1924	212.908	5.18604
	A2	Sequence	# PSMs	# Proteins	# Protein Groups	Protein Group Accessions	Modifications	ΔCn	Area	XCorr	Charge	MH+ [Da]	ΔM [ppm]	RT [min]	# Missed Cleavages
	High	NQVFLESVPK	2	3	3	unk		0	5.70714e+07	2.24145	2	1160.63	1.55846	33.8356	0
unk	len=3119 - [Mii78597_c0_g1_i4_6]	4.29056	0.96	1	0	1	2	5.70714e+07	1040	114.565	4.89404
	A2	Sequence	# PSMs	# Proteins	# Protein Groups	Protein Group Accessions	Modifications	ΔCn	Area	XCorr	Charge	MH+ [Da]	ΔM [ppm]	RT [min]	# Missed Cleavages
	High	NQVFLESVPK	2	3	3	unk		0	5.70714e+07	2.24145	2	1160.63	1.55846	33.8356	0
unk	len=2631 - [Mii78135_c0_g1_i3_3]	3.57362	4.68	1	1	1	1	630343952	876	97.7382	5.08447
	A2	Sequence	# PSMs	# Proteins	# Protein Groups	Protein Group Accessions	Modifications	ΔCn	Area	XCorr	Charge	MH+ [Da]	ΔM [ppm]	RT [min]	# Missed Cleavages
	High	NERPSxTSGFNHQEVVVDRLSNDDIcYNAcIExRYmIYIDR	1	1	1	unk	X6(L); C26(Carbamidomethyl); C30(Carbamidomethyl); X33(L); M36(Oxidation)	0	630343952	3.57362	4	4991.35	-0.76203	42.6531	2
unk	len=359 - [Mii15957_c0_g1_i1_6]	3.49904	11.86	1	0	1	1	1.29257e+08	118	13.2969	5.79541
	A2	Sequence	# PSMs	# Proteins	# Protein Groups	Protein Group Accessions	Modifications	ΔCn	Area	XCorr	Charge	MH+ [Da]	ΔM [ppm]	RT [min]	# Missed Cleavages
	High	NLDIERPTYTNLNR	1	31	31	unk		0	1.29257e+08	3.49904	3	1718.88	1.68806	31.6432	0
unk	len=426 - [Mii24072_c0_g1_i1_6]	3.49904	9.93	1	0	1	1	1.29257e+08	141	15.9248	5.78271
	A2	Sequence	# PSMs	# Proteins	# Protein Groups	Protein Group Accessions	Modifications	ΔCn	Area	XCorr	Charge	MH+ [Da]	ΔM [ppm]	RT [min]	# Missed Cleavages
	High	NLDIERPTYTNLNR	1	31	31	unk		0	1.29257e+08	3.49904	3	1718.88	1.68806	31.6432	0
unk	len=922 - [Mii40167_c0_g1_i1_5]	3.49904	4.56	1	0	1	1	1.29257e+08	307	34.0829	5.47803
	A2	Sequence	# PSMs	# Proteins	# Protein Groups	Protein Group Accessions	Modifications	ΔCn	Area	XCorr	Charge	MH+ [Da]	ΔM [ppm]	RT [min]	# Missed Cleavages
	High	NLDIERPTYTNLNR	1	31	31	unk		0	1.29257e+08	3.49904	3	1718.88	1.68806	31.6432	0
unk	len=384 - [Mii46234_c0_g1_i1_4]	3.49904	10.94	1	0	1	1	1.29257e+08	128	15.1747	9.77393
	A2	Sequence	# PSMs	# Proteins	# Protein Groups	Protein Group Accessions	Modifications	ΔCn	Area	XCorr	Charge	MH+ [Da]	ΔM [ppm]	RT [min]	# Missed Cleavages
	High	NLDIERPTYTNLNR	1	31	31	unk		0	1.29257e+08	3.49904	3	1718.88	1.68806	31.6432	0
unk	len=366 - [Mii46632_c0_g1_i1_2]	3.49904	11.57	1	0	1	1	1.29257e+08	121	13.4197	6.27783
	A2	Sequence	# PSMs	# Proteins	# Protein Groups	Protein Group Accessions	Modifications	ΔCn	Area	XCorr	Charge	MH+ [Da]	ΔM [ppm]	RT [min]	# Missed Cleavages
	High	NLDIERPTYTNLNR	1	31	31	unk		0	1.29257e+08	3.49904	3	1718.88	1.68806	31.6432	0
unk	len=814 - [Mii46632_c0_g1_i2_3]	3.49904	5.19	1	0	1	1	1.29257e+08	270	29.7619	5.43994
	A2	Sequence	# PSMs	# Proteins	# Protein Groups	Protein Group Accessions	Modifications	ΔCn	Area	XCorr	Charge	MH+ [Da]	ΔM [ppm]	RT [min]	# Missed Cleavages
	High	NLDIERPTYTNLNR	1	31	31	unk		0	1.29257e+08	3.49904	3	1718.88	1.68806	31.6432	0
unk	len=680 - [Mii56121_c0_g1_i1_6]	3.49904	6.19	1	0	1	1	1.29257e+08	226	26.2769	9.62744
	A2	Sequence	# PSMs	# Proteins	# Protein Groups	Protein Group Accessions	Modifications	ΔCn	Area	XCorr	Charge	MH+ [Da]	ΔM [ppm]	RT [min]	# Missed Cleavages
	High	NLDIERPTYTNINR	1	31	31	unk		0	1.29257e+08	3.49904	3	1718.88	1.68806	31.6432	0
unk	len=786 - [Mii57421_c0_g1_i1_2]	3.49904	5.34	1	0	1	1	1.29257e+08	262	29.2168	6.41748
	A2	Sequence	# PSMs	# Proteins	# Protein Groups	Protein Group Accessions	Modifications	ΔCn	Area	XCorr	Charge	MH+ [Da]	ΔM [ppm]	RT [min]	# Missed Cleavages
	High	NLDIERPTYTNINR	1	31	31	unk		0	1.29257e+08	3.49904	3	1718.88	1.68806	31.6432	0
unk	len=894 - [Mii57421_c0_g1_i2_2]	3.49904	4.7	1	0	1	1	1.29257e+08	298	33.3729	6.97607
	A2	Sequence	# PSMs	# Proteins	# Protein Groups	Protein Group Accessions	Modifications	ΔCn	Area	XCorr	Charge	MH+ [Da]	ΔM [ppm]	RT [min]	# Missed Cleavages
	High	NLDIERPTYTNINR	1	31	31	unk		0	1.29257e+08	3.49904	3	1718.88	1.68806	31.6432	0
unk	len=1148 - [Mii57421_c0_g1_i3_1]	3.49904	3.66	1	0	1	1	1.29257e+08	383	42.7075	6.82959
	A2	Sequence	# PSMs	# Proteins	# Protein Groups	Protein Group Accessions	Modifications	ΔCn	Area	XCorr	Charge	MH+ [Da]	ΔM [ppm]	RT [min]	# Missed Cleavages
	High	NLDIERPTYTNINR	1	31	31	unk		0	1.29257e+08	3.49904	3	1718.88	1.68806	31.6432	0
unk	len=822 - [Mii65987_c0_g1_i1_3]	3.49904	5.13	1	0	1	1	1.29257e+08	273	30.7553	6.15088
	A2	Sequence	# PSMs	# Proteins	# Protein Groups	Protein Group Accessions	Modifications	ΔCn	Area	XCorr	Charge	MH+ [Da]	ΔM [ppm]	RT [min]	# Missed Cleavages
	High	NLDIERPTYTNLNR	1	31	31	unk		0	1.29257e+08	3.49904	3	1718.88	1.68806	31.6432	0
unk	len=377 - [Mii65987_c0_g1_i2_3]	3.49904	11.2	1	0	1	1	1.29257e+08	125	14.2261	5.42725
	A2	Sequence	# PSMs	# Proteins	# Protein Groups	Protein Group Accessions	Modifications	ΔCn	Area	XCorr	Charge	MH+ [Da]	ΔM [ppm]	RT [min]	# Missed Cleavages
	High	NLDIERPTYTNLNR	1	31	31	unk		0	1.29257e+08	3.49904	3	1718.88	1.68806	31.6432	0
unk	len=1300 - [Mii65987_c1_g1_i1_4]	3.49904	3.23	1	0	1	1	1.29257e+08	433	48.2038	5.40186
	A2	Sequence	# PSMs	# Proteins	# Protein Groups	Protein Group Accessions	Modifications	ΔCn	Area	XCorr	Charge	MH+ [Da]	ΔM [ppm]	RT [min]	# Missed Cleavages
	High	NLDIERPTYTNLNR	1	31	31	unk		0	1.29257e+08	3.49904	3	1718.88	1.68806	31.6432	0
unk	len=1362 - [Mii65987_c1_g1_i2_4]	3.49904	3.08	1	0	1	1	1.29257e+08	454	51.5544	7.57666
	A2	Sequence	# PSMs	# Proteins	# Protein Groups	Protein Group Accessions	Modifications	ΔCn	Area	XCorr	Charge	MH+ [Da]	ΔM [ppm]	RT [min]	# Missed Cleavages
	High	NLDIERPTYTNLNR	1	31	31	unk		0	1.29257e+08	3.49904	3	1718.88	1.68806	31.6432	0
unk	len=723 - [Mii68344_c0_g2_i2_6]	3.49904	5.81	1	0	1	1	1.29257e+08	241	27.2585	5.38916
	A2	Sequence	# PSMs	# Proteins	# Protein Groups	Protein Group Accessions	Modifications	ΔCn	Area	XCorr	Charge	MH+ [Da]	ΔM [ppm]	RT [min]	# Missed Cleavages
	High	NLDIERPTYTNLNR	1	31	31	unk		0	1.29257e+08	3.49904	3	1718.88	1.68806	31.6432	0
unk	len=1812 - [Mii68344_c0_g2_i3_4]	3.49904	2.32	1	0	1	1	1.29257e+08	604	67.7432	5.35107
	A2	Sequence	# PSMs	# Proteins	# Protein Groups	Protein Group Accessions	Modifications	ΔCn	Area	XCorr	Charge	MH+ [Da]	ΔM [ppm]	RT [min]	# Missed Cleavages
	High	NLDIERPTYTNLNR	1	31	31	unk		0	1.29257e+08	3.49904	3	1718.88	1.68806	31.6432	0
unk	len=1018 - [Mii70512_c1_g1_i1_3]	3.49904	4.14	1	0	1	1	1.29257e+08	338	37.6759	6.52197
	A2	Sequence	# PSMs	# Proteins	# Protein Groups	Protein Group Accessions	Modifications	ΔCn	Area	XCorr	Charge	MH+ [Da]	ΔM [ppm]	RT [min]	# Missed Cleavages
	High	NLDIERPTYTNLNR	1	31	31	unk		0	1.29257e+08	3.49904	3	1718.88	1.68806	31.6432	0
unk	len=1009 - [Mii70512_c1_g2_i1_3]	3.49904	4.17	1	0	1	1	1.29257e+08	336	37.4808	5.92236
	A2	Sequence	# PSMs	# Proteins	# Protein Groups	Protein Group Accessions	Modifications	ΔCn	Area	XCorr	Charge	MH+ [Da]	ΔM [ppm]	RT [min]	# Missed Cleavages
	High	NLDIERPTYTNLNR	1	31	31	unk		0	1.29257e+08	3.49904	3	1718.88	1.68806	31.6432	0
unk	len=1125 - [Mii72254_c0_g1_i1_4]	3.49904	3.73	1	0	1	1	1.29257e+08	375	41.7443	5.96045
	A2	Sequence	# PSMs	# Proteins	# Protein Groups	Protein Group Accessions	Modifications	ΔCn	Area	XCorr	Charge	MH+ [Da]	ΔM [ppm]	RT [min]	# Missed Cleavages
	High	NLDIERPTYTNLNR	1	31	31	unk		0	1.29257e+08	3.49904	3	1718.88	1.68806	31.6432	0
unk	len=3119 - [Mii78597_c0_g1_i4_5]	3.35657	2.89	1	1	1	1	78316980	1039	116.181	10.1255
	A2	Sequence	# PSMs	# Proteins	# Protein Groups	Protein Group Accessions	Modifications	ΔCn	Area	XCorr	Charge	MH+ [Da]	ΔM [ppm]	RT [min]	# Missed Cleavages
	High	AGmLVLSTmxICRPLcLKTACRLATPAEEK	1	1	1	unk	M3(Oxidation); M9(Oxidation); X10(L); C16(Carbamidomethyl)	0	78316980	3.35657	4	3321.73	1.02885	44.7327	2
unk	len=4125 - [Mii70735_c0_g1_i1_4]	3.34497	1.6	1	0	1	1	9824776	1375	151.59	5.08447
	A2	Sequence	# PSMs	# Proteins	# Protein Groups	Protein Group Accessions	Modifications	ΔCn	Area	XCorr	Charge	MH+ [Da]	ΔM [ppm]	RT [min]	# Missed Cleavages
	High	TVKNPASFGGRPcTDQNVQSER	1	2	2	unk	C13(Carbamidomethyl)	0	9824776	3.34497	4	2448.17	1.61376	24.2492	1
unk	len=4074 - [Mii73053_c0_g1_i1_3]	3.34497	1.62	1	0	1	1	9824776	1357	149.329	5.0083
	A2	Sequence	# PSMs	# Proteins	# Protein Groups	Protein Group Accessions	Modifications	ΔCn	Area	XCorr	Charge	MH+ [Da]	ΔM [ppm]	RT [min]	# Missed Cleavages
	High	TVKNPASFGGRPcTDQNVQSER	1	2	2	unk	C13(Carbamidomethyl)	0	9824776	3.34497	4	2448.17	1.61376	24.2492	1
unk	len=723 - [Mii55144_c0_g1_i1_6]	3.03646	9.17	1	1	1	1		240	27.254	4.28467
	A2	Sequence	# PSMs	# Proteins	# Protein Groups	Protein Group Accessions	Modifications	ΔCn	Area	XCorr	Charge	MH+ [Da]	ΔM [ppm]	RT [min]	# Missed Cleavages
	High	LASPEASNTcQAFVDTVASFVR	1	1	1	unk	C10(Carbamidomethyl)	0	0	3.03646	3	2370.15	2.37557	50.3873	0
unk	len=432 - [Mii73416_c0_g2_i1_5]	3.01016	13.99	1	0	1	1	3.41885e+07	143	15.2213	9.56885
	A2	Sequence	# PSMs	# Proteins	# Protein Groups	Protein Group Accessions	Modifications	ΔCn	Area	XCorr	Charge	MH+ [Da]	ΔM [ppm]	RT [min]	# Missed Cleavages
	High	LNNLLESPLEELKSVVLIVR	1	8	8	unk		0	3.41885e+07	3.01016	3	2278.34	1.41879	54.4376	1
unk	len=396 - [Mii73416_c0_g2_i2_5]	3.01016	15.27	1	0	1	1	3.41885e+07	131	14.1217	9.0415
	A2	Sequence	# PSMs	# Proteins	# Protein Groups	Protein Group Accessions	Modifications	ΔCn	Area	XCorr	Charge	MH+ [Da]	ΔM [ppm]	RT [min]	# Missed Cleavages
	High	LNNLLESPLEELKSVVLIVR	1	8	8	unk		0	3.41885e+07	3.01016	3	2278.34	1.41879	54.4376	1
unk	len=1105 - [Mii73416_c1_g1_i1_3]	3.01016	5.43	1	0	1	1	3.41885e+07	368	40.2263	8.79248
	A2	Sequence	# PSMs	# Proteins	# Protein Groups	Protein Group Accessions	Modifications	ΔCn	Area	XCorr	Charge	MH+ [Da]	ΔM [ppm]	RT [min]	# Missed Cleavages
	High	LNNLLESPLEELKSVVLIVR	1	8	8	unk		0	3.41885e+07	3.01016	3	2278.34	1.41879	54.4376	1
unk	len=1200 - [Mii73416_c1_g1_i2_3]	3.01016	5.01	1	0	1	1	3.41885e+07	399	43.7303	8.88037
	A2	Sequence	# PSMs	# Proteins	# Protein Groups	Protein Group Accessions	Modifications	ΔCn	Area	XCorr	Charge	MH+ [Da]	ΔM [ppm]	RT [min]	# Missed Cleavages
	High	LNNLLESPLEELKSVVLIVR	1	8	8	unk		0	3.41885e+07	3.01016	3	2278.34	1.41879	54.4376	1
unk	len=1272 - [Mii73416_c1_g1_i3_3]	3.01016	4.73	1	0	1	1	3.41885e+07	423	46.4206	8.6167
	A2	Sequence	# PSMs	# Proteins	# Protein Groups	Protein Group Accessions	Modifications	ΔCn	Area	XCorr	Charge	MH+ [Da]	ΔM [ppm]	RT [min]	# Missed Cleavages
	High	LNNLLESPLEELKSVVLIVR	1	8	8	unk		0	3.41885e+07	3.01016	3	2278.34	1.41879	54.4376	1
unk	len=543 - [Mii73416_c1_g1_i4_3]	3.01016	11.11	1	0	1	1	3.41885e+07	180	19.5032	8.73389
	A2	Sequence	# PSMs	# Proteins	# Protein Groups	Protein Group Accessions	Modifications	ΔCn	Area	XCorr	Charge	MH+ [Da]	ΔM [ppm]	RT [min]	# Missed Cleavages
	High	LNNLLESPLEELKSVVLIVR	1	8	8	unk		0	3.41885e+07	3.01016	3	2278.34	1.41879	54.4376	1
unk	len=615 - [Mii73416_c1_g1_i5_3]	3.01016	9.8	1	0	1	1	3.41885e+07	204	22.3105	6.80029
	A2	Sequence	# PSMs	# Proteins	# Protein Groups	Protein Group Accessions	Modifications	ΔCn	Area	XCorr	Charge	MH+ [Da]	ΔM [ppm]	RT [min]	# Missed Cleavages
	High	LNNLLESPLEELKSVVLIVR	1	8	8	unk		0	3.41885e+07	3.01016	3	2278.34	1.41879	54.4376	1
unk	len=1000 - [Mii73416_c1_g1_i6_3]	3.01016	6.01	1	0	1	1	3.41885e+07	333	36.563	6.81494
	A2	Sequence	# PSMs	# Proteins	# Protein Groups	Protein Group Accessions	Modifications	ΔCn	Area	XCorr	Charge	MH+ [Da]	ΔM [ppm]	RT [min]	# Missed Cleavages
	High	LNNLLESPLEELKSVVLIVR	1	8	8	unk		0	3.41885e+07	3.01016	3	2278.34	1.41879	54.4376	1
unk	len=3528 - [Mii77765_c0_g2_i3_3]	2.98207	3.83	1	0	1	1		1175	134.976	9.27588
	A2	Sequence	# PSMs	# Proteins	# Protein Groups	Protein Group Accessions	Modifications	ΔCn	Area	XCorr	Charge	MH+ [Da]	ΔM [ppm]	RT [min]	# Missed Cleavages
	High	RNDSLSmxPFFVASTVIPSAAYccRSSFGTSFPLMTITGGIcSPR	1	6	6	unk	M7(Oxidation); X8(L); C23(Carbamidomethyl); C24(Carbamidomethyl); C42(Carbamidomethyl)	0	0	2.98207	4	4975.33	-7.80938	40.6961	2
unk	len=2573 - [Mii77765_c0_g2_i5_3]	2.98207	5.25	1	0	1	1		857	98.1442	9.02686
	A2	Sequence	# PSMs	# Proteins	# Protein Groups	Protein Group Accessions	Modifications	ΔCn	Area	XCorr	Charge	MH+ [Da]	ΔM [ppm]	RT [min]	# Missed Cleavages
	High	RNDSLSmxPFFVASTVIPSAAYccRSSFGTSFPLMTITGGIcSPR	1	6	6	unk	M7(Oxidation); X8(L); C23(Carbamidomethyl); C24(Carbamidomethyl); C42(Carbamidomethyl)	0	0	2.98207	4	4975.33	-7.80938	40.6961	2
unk	len=3775 - [Mii77765_c0_g2_i8_3]	2.98207	3.58	1	0	1	1		1257	144.465	9.34912
	A2	Sequence	# PSMs	# Proteins	# Protein Groups	Protein Group Accessions	Modifications	ΔCn	Area	XCorr	Charge	MH+ [Da]	ΔM [ppm]	RT [min]	# Missed Cleavages
	High	RNDSLSmxPFFVASTVIPSAAYccRSSFGTSFPLMTITGGIcSPR	1	6	6	unk	M7(Oxidation); X8(L); C23(Carbamidomethyl); C24(Carbamidomethyl); C42(Carbamidomethyl)	0	0	2.98207	4	4975.33	-7.80938	40.6961	2
unk	len=2567 - [Mii77765_c0_g2_i11_1]	2.98207	5.26	1	0	1	1		855	97.9643	9.01221
	A2	Sequence	# PSMs	# Proteins	# Protein Groups	Protein Group Accessions	Modifications	ΔCn	Area	XCorr	Charge	MH+ [Da]	ΔM [ppm]	RT [min]	# Missed Cleavages
	High	RNDSLSmxPFFVASTVIPSAAYccRSSFGTSFPLMTITGGIcSPR	1	6	6	unk	M7(Oxidation); X8(L); C23(Carbamidomethyl); C24(Carbamidomethyl); C42(Carbamidomethyl)	0	0	2.98207	4	4975.33	-7.80938	40.6961	2
unk	len=3063 - [Mii79799_c0_g3_i1_5]	2.98207	4.41	1	0	1	1		1020	117.132	9.34912
	A2	Sequence	# PSMs	# Proteins	# Protein Groups	Protein Group Accessions	Modifications	ΔCn	Area	XCorr	Charge	MH+ [Da]	ΔM [ppm]	RT [min]	# Missed Cleavages
	High	RNDSLSmxPFFVASTVIPSAAYccRSSFGTSFPLMTITGGIcSPR	1	6	6	unk	M7(Oxidation); X8(L); C23(Carbamidomethyl); C24(Carbamidomethyl); C42(Carbamidomethyl)	0	0	2.98207	4	4975.33	-7.80938	40.6961	2
unk	len=3204 - [Mii79799_c0_g3_i4_6]	2.98207	4.21	1	0	1	1		1068	122.423	9.36377
	A2	Sequence	# PSMs	# Proteins	# Protein Groups	Protein Group Accessions	Modifications	ΔCn	Area	XCorr	Charge	MH+ [Da]	ΔM [ppm]	RT [min]	# Missed Cleavages
	High	RNDSLSmxPFFVASTVIPSAAYccRSSFGTSFPLMTITGGIcSPR	1	6	6	unk	M7(Oxidation); X8(L); C23(Carbamidomethyl); C24(Carbamidomethyl); C42(Carbamidomethyl)	0	0	2.98207	4	4975.33	-7.80938	40.6961	2
unk	len=2355 - [Mii74105_c1_g1_i1_6]	2.93433	1.78	1	0	1	1	33289106	785	85.1678	4.66553
	A2	Sequence	# PSMs	# Proteins	# Protein Groups	Protein Group Accessions	Modifications	ΔCn	Area	XCorr	Charge	MH+ [Da]	ΔM [ppm]	RT [min]	# Missed Cleavages
	High	IRDSISLPIQNVQK	1	2	2	unk		0	33289106	2.93433	3	1610.92	0.920619	34.0063	1
unk	len=2382 - [Mii74105_c1_g1_i2_6]	2.93433	1.76	1	0	1	1	33289106	794	85.9632	4.66553
	A2	Sequence	# PSMs	# Proteins	# Protein Groups	Protein Group Accessions	Modifications	ΔCn	Area	XCorr	Charge	MH+ [Da]	ΔM [ppm]	RT [min]	# Missed Cleavages
	High	IRDSISLPIQNVQK	1	2	2	unk		0	33289106	2.93433	3	1610.92	0.920619	34.0063	1
unk	len=451 - [Mii7977_c0_g1_i1_5]	2.07907	12	1	0	1	1	28724221	150	16.7932	5.89697
	A2	Sequence	# PSMs	# Proteins	# Protein Groups	Protein Group Accessions	Modifications	ΔCn	Area	XCorr	Charge	MH+ [Da]	ΔM [ppm]	RT [min]	# Missed Cleavages
	High	VGLNYQPPTVVPGGDLAK	1	39	39	unk		0	28724221	2.07907	2	1824.99	1.27632	37.0929	0
unk	len=442 - [Mii21001_c0_g1_i1_4]	2.07907	12.24	1	0	1	1	28724221	147	16.313	6.52197
	A2	Sequence	# PSMs	# Proteins	# Protein Groups	Protein Group Accessions	Modifications	ΔCn	Area	XCorr	Charge	MH+ [Da]	ΔM [ppm]	RT [min]	# Missed Cleavages
	High	VGINYQPPTVVPGGDLAK	1	39	39	unk		0	28724221	2.07907	2	1824.99	1.27632	37.0929	0
unk	len=640 - [Mii40849_c0_g1_i1_2]	2.07907	8.45	1	0	1	1	28724221	213	24.2197	5.30029
	A2	Sequence	# PSMs	# Proteins	# Protein Groups	Protein Group Accessions	Modifications	ΔCn	Area	XCorr	Charge	MH+ [Da]	ΔM [ppm]	RT [min]	# Missed Cleavages
	High	VGINYQPPTVVPGGDLAK	1	39	39	unk		0	28724221	2.07907	2	1824.99	1.27632	37.0929	0
unk	len=1175 - [Mii45655_c0_g1_i1_5]	2.07907	4.6	1	0	1	1	28724221	391	44.0226	5.2749
	A2	Sequence	# PSMs	# Proteins	# Protein Groups	Protein Group Accessions	Modifications	ΔCn	Area	XCorr	Charge	MH+ [Da]	ΔM [ppm]	RT [min]	# Missed Cleavages
	High	VGINYQPPTVVPGGDLAK	1	39	39	unk		0	28724221	2.07907	2	1824.99	1.27632	37.0929	0
unk	len=281 - [Mii46879_c0_g1_i1_1]	2.07907	19.35	1	0	1	1	28724221	93	10.4472	7.28369
	A2	Sequence	# PSMs	# Proteins	# Protein Groups	Protein Group Accessions	Modifications	ΔCn	Area	XCorr	Charge	MH+ [Da]	ΔM [ppm]	RT [min]	# Missed Cleavages
	High	VGLNYQPPTVVPGGDLAK	1	39	39	unk		0	28724221	2.07907	2	1824.99	1.27632	37.0929	0
unk	len=265 - [Mii46879_c0_g1_i2_1]	2.07907	20.45	1	0	1	1	28724221	88	9.89611	9.65674
	A2	Sequence	# PSMs	# Proteins	# Protein Groups	Protein Group Accessions	Modifications	ΔCn	Area	XCorr	Charge	MH+ [Da]	ΔM [ppm]	RT [min]	# Missed Cleavages
	High	VGLNYQPPTVVPGGDLAK	1	39	39	unk		0	28724221	2.07907	2	1824.99	1.27632	37.0929	0
unk	len=437 - [Mii52200_c0_g1_i1_6]	2.07907	12.41	1	0	1	1	28724221	145	16.166	6.30322
	A2	Sequence	# PSMs	# Proteins	# Protein Groups	Protein Group Accessions	Modifications	ΔCn	Area	XCorr	Charge	MH+ [Da]	ΔM [ppm]	RT [min]	# Missed Cleavages
	High	VGINYQPPTVVPGGDLAK	1	39	39	unk		0	28724221	2.07907	2	1824.99	1.27632	37.0929	0
unk	len=679 - [Mii54610_c0_g2_i1_2]	2.07907	8	1	0	1	1	28724221	225	25.3605	5.19873
	A2	Sequence	# PSMs	# Proteins	# Protein Groups	Protein Group Accessions	Modifications	ΔCn	Area	XCorr	Charge	MH+ [Da]	ΔM [ppm]	RT [min]	# Missed Cleavages
	High	VGINYQPPTVVPGGDLAK	1	39	39	unk		0	28724221	2.07907	2	1824.99	1.27632	37.0929	0
unk	len=1819 - [Mii60781_c0_g1_i1_4]	2.07907	2.97	1	0	1	1	28724221	606	68.9161	6.90283
	A2	Sequence	# PSMs	# Proteins	# Protein Groups	Protein Group Accessions	Modifications	ΔCn	Area	XCorr	Charge	MH+ [Da]	ΔM [ppm]	RT [min]	# Missed Cleavages
	High	VGLNYQPPTVVPGGDLAK	1	39	39	unk		0	28724221	2.07907	2	1824.99	1.27632	37.0929	0
unk	len=923 - [Mii66880_c1_g1_i1_3]	2.07907	5.86	1	0	1	1	28724221	307	34.85	5.22412
	A2	Sequence	# PSMs	# Proteins	# Protein Groups	Protein Group Accessions	Modifications	ΔCn	Area	XCorr	Charge	MH+ [Da]	ΔM [ppm]	RT [min]	# Missed Cleavages
	High	VGINYQPPTVVPGGDLAK	1	39	39	unk		0	28724221	2.07907	2	1824.99	1.27632	37.0929	0
unk	len=925 - [Mii66880_c1_g1_i2_3]	2.07907	5.86	1	0	1	1	28724221	307	34.4623	5.021
	A2	Sequence	# PSMs	# Proteins	# Protein Groups	Protein Group Accessions	Modifications	ΔCn	Area	XCorr	Charge	MH+ [Da]	ΔM [ppm]	RT [min]	# Missed Cleavages
	High	VGINYQPPTVVPGGDLAK	1	39	39	unk		0	28724221	2.07907	2	1824.99	1.27632	37.0929	0
unk	len=745 - [Mii66880_c1_g1_i3_3]	2.07907	7.29	1	0	1	1	28724221	247	27.843	5.14795
	A2	Sequence	# PSMs	# Proteins	# Protein Groups	Protein Group Accessions	Modifications	ΔCn	Area	XCorr	Charge	MH+ [Da]	ΔM [ppm]	RT [min]	# Missed Cleavages
	High	VGINYQPPTVVPGGDLAK	1	39	39	unk		0	28724221	2.07907	2	1824.99	1.27632	37.0929	0
unk	len=743 - [Mii66880_c1_g1_i5_3]	2.07907	7.29	1	0	1	1	28724221	247	28.2307	5.47803
	A2	Sequence	# PSMs	# Proteins	# Protein Groups	Protein Group Accessions	Modifications	ΔCn	Area	XCorr	Charge	MH+ [Da]	ΔM [ppm]	RT [min]	# Missed Cleavages
	High	VGINYQPPTVVPGGDLAK	1	39	39	unk		0	28724221	2.07907	2	1824.99	1.27632	37.0929	0
unk	len=1215 - [Mii66880_c2_g1_i1_4]	2.07907	4.44	1	0	1	1	28724221	405	45.4278	5.23682
	A2	Sequence	# PSMs	# Proteins	# Protein Groups	Protein Group Accessions	Modifications	ΔCn	Area	XCorr	Charge	MH+ [Da]	ΔM [ppm]	RT [min]	# Missed Cleavages
	High	VGINYQPPTVVPGGDLAK	1	39	39	unk		0	28724221	2.07907	2	1824.99	1.27632	37.0929	0
unk	len=1098 - [Mii66880_c2_g1_i2_4]	2.07907	4.92	1	0	1	1	28724221	366	41.5641	5.43994
	A2	Sequence	# PSMs	# Proteins	# Protein Groups	Protein Group Accessions	Modifications	ΔCn	Area	XCorr	Charge	MH+ [Da]	ΔM [ppm]	RT [min]	# Missed Cleavages
	High	VGINYQPPTVVPGGDLAK	1	39	39	unk		0	28724221	2.07907	2	1824.99	1.27632	37.0929	0
unk	len=1272 - [Mii66880_c2_g1_i3_4]	2.07907	4.25	1	0	1	1	28724221	424	47.9964	5.70654
	A2	Sequence	# PSMs	# Proteins	# Protein Groups	Protein Group Accessions	Modifications	ΔCn	Area	XCorr	Charge	MH+ [Da]	ΔM [ppm]	RT [min]	# Missed Cleavages
	High	VGINYQPPTVVPGGDLAK	1	39	39	unk		0	28724221	2.07907	2	1824.99	1.27632	37.0929	0
unk	len=1214 - [Mii66880_c2_g1_i4_6]	2.07907	4.46	1	0	1	1	28724221	404	45.2742	5.16064
	A2	Sequence	# PSMs	# Proteins	# Protein Groups	Protein Group Accessions	Modifications	ΔCn	Area	XCorr	Charge	MH+ [Da]	ΔM [ppm]	RT [min]	# Missed Cleavages
	High	VGINYQPPTVVPGGDLAK	1	39	39	unk		0	28724221	2.07907	2	1824.99	1.27632	37.0929	0
unk	len=1925 - [Mii69442_c0_g1_i3_5]	2.07907	2.81	1	0	1	1	28724221	641	72.7238	6.78564
	A2	Sequence	# PSMs	# Proteins	# Protein Groups	Protein Group Accessions	Modifications	ΔCn	Area	XCorr	Charge	MH+ [Da]	ΔM [ppm]	RT [min]	# Missed Cleavages
	High	VGINYQPPTVVPGGDLAK	1	39	39	unk		0	28724221	2.07907	2	1824.99	1.27632	37.0929	0
unk	len=1846 - [Mii69442_c0_g1_i4_5]	2.07907	2.93	1	0	1	1	28724221	615	69.7185	6.3667
	A2	Sequence	# PSMs	# Proteins	# Protein Groups	Protein Group Accessions	Modifications	ΔCn	Area	XCorr	Charge	MH+ [Da]	ΔM [ppm]	RT [min]	# Missed Cleavages
	High	VGINYQPPTVVPGGDLAK	1	39	39	unk		0	28724221	2.07907	2	1824.99	1.27632	37.0929	0
unk	len=893 - [Mii70920_c0_g1_i1_1]	2.07907	6.04	1	0	1	1	28724221	298	33.3204	5.13525
	A2	Sequence	# PSMs	# Proteins	# Protein Groups	Protein Group Accessions	Modifications	ΔCn	Area	XCorr	Charge	MH+ [Da]	ΔM [ppm]	RT [min]	# Missed Cleavages
	High	VGLNYQPPTVVPGGDLAK	1	39	39	unk		0	28724221	2.07907	2	1824.99	1.27632	37.0929	0
unk	len=712 - [Mii70920_c0_g1_i2_1]	2.07907	7.59	1	0	1	1	28724221	237	26.6806	7.89893
	A2	Sequence	# PSMs	# Proteins	# Protein Groups	Protein Group Accessions	Modifications	ΔCn	Area	XCorr	Charge	MH+ [Da]	ΔM [ppm]	RT [min]	# Missed Cleavages
	High	VGLNYQPPTVVPGGDLAK	1	39	39	unk		0	28724221	2.07907	2	1824.99	1.27632	37.0929	0
unk	len=612 - [Mii70920_c0_g1_i3_3]	2.07907	8.87	1	0	1	1	28724221	203	22.9098	8.95361
	A2	Sequence	# PSMs	# Proteins	# Protein Groups	Protein Group Accessions	Modifications	ΔCn	Area	XCorr	Charge	MH+ [Da]	ΔM [ppm]	RT [min]	# Missed Cleavages
	High	VGLNYQPPTVVPGGDLAK	1	39	39	unk		0	28724221	2.07907	2	1824.99	1.27632	37.0929	0
unk	len=793 - [Mii70920_c0_g1_i4_3]	2.07907	6.82	1	0	1	1	28724221	264	29.5496	5.47803
	A2	Sequence	# PSMs	# Proteins	# Protein Groups	Protein Group Accessions	Modifications	ΔCn	Area	XCorr	Charge	MH+ [Da]	ΔM [ppm]	RT [min]	# Missed Cleavages
	High	VGLNYQPPTVVPGGDLAK	1	39	39	unk		0	28724221	2.07907	2	1824.99	1.27632	37.0929	0
unk	len=1001 - [Mii70920_c2_g1_i2_3]	2.07907	5.41	1	0	1	1	28724221	333	37.8975	5.2749
	A2	Sequence	# PSMs	# Proteins	# Protein Groups	Protein Group Accessions	Modifications	ΔCn	Area	XCorr	Charge	MH+ [Da]	ΔM [ppm]	RT [min]	# Missed Cleavages
	High	VGINYQPPTVVPGGDLAK	1	39	39	unk		0	28724221	2.07907	2	1824.99	1.27632	37.0929	0
unk	len=419 - [Mii72538_c1_g2_i2_1]	2.07907	12.95	1	0	1	1	28724221	139	15.4406	4.95752
	A2	Sequence	# PSMs	# Proteins	# Protein Groups	Protein Group Accessions	Modifications	ΔCn	Area	XCorr	Charge	MH+ [Da]	ΔM [ppm]	RT [min]	# Missed Cleavages
	High	VGINYQPPTVVPGGDLAK	1	39	39	unk		0	28724221	2.07907	2	1824.99	1.27632	37.0929	0
unk	len=499 - [Mii72538_c1_g2_i3_1]	2.07907	10.84	1	0	1	1	28724221	166	18.7982	5.2749
	A2	Sequence	# PSMs	# Proteins	# Protein Groups	Protein Group Accessions	Modifications	ΔCn	Area	XCorr	Charge	MH+ [Da]	ΔM [ppm]	RT [min]	# Missed Cleavages
	High	VGINYQPPTVVPGGDLAK	1	39	39	unk		0	28724221	2.07907	2	1824.99	1.27632	37.0929	0
unk	len=409 - [Mii102341_c0_g1_i1_3]	2.07907	13.33	1	0	1	1	28724221	135	15.1224	8.25049
	A2	Sequence	# PSMs	# Proteins	# Protein Groups	Protein Group Accessions	Modifications	ΔCn	Area	XCorr	Charge	MH+ [Da]	ΔM [ppm]	RT [min]	# Missed Cleavages
	High	VGINYQPPTVVPGGDLAK	1	39	39	unk		0	28724221	2.07907	2	1824.99	1.27632	37.0929	0
unk	len=2332 - [Mii65815_c0_g1_i1_6]	2.02236	1.54	1	0	1	1	401216272	777	91.4678	9.61279
	A2	Sequence	# PSMs	# Proteins	# Protein Groups	Protein Group Accessions	Modifications	ΔCn	Area	XCorr	Charge	MH+ [Da]	ΔM [ppm]	RT [min]	# Missed Cleavages
	High	LVSEDxSxAEVK	1	3	3	unk	X6(L); X8(L)	0	401216272	2.02236	2	1302.72	0.425681	46.0838	0
unk	len=2344 - [Mii65815_c0_g1_i2_6]	2.02236	1.54	1	0	1	1	401216272	781	91.828	9.61279
	A2	Sequence	# PSMs	# Proteins	# Protein Groups	Protein Group Accessions	Modifications	ΔCn	Area	XCorr	Charge	MH+ [Da]	ΔM [ppm]	RT [min]	# Missed Cleavages
	High	LVSEDxSxAEVK	1	3	3	unk	X6(L); X8(L)	0	401216272	2.02236	2	1302.72	0.425681	46.0838	0
unk	len=332 - [Mii108644_c0_g1_i1_2]	2.02236	10.91	1	0	1	1	401216272	110	13.2545	9.45166
	A2	Sequence	# PSMs	# Proteins	# Protein Groups	Protein Group Accessions	Modifications	ΔCn	Area	XCorr	Charge	MH+ [Da]	ΔM [ppm]	RT [min]	# Missed Cleavages
	High	LVSEDxSxAEVK	1	3	3	unk	X6(L); X8(L)	0	401216272	2.02236	2	1302.72	0.425681	46.0838	0
unk	len=440 - [Mii107732_c0_g1_i1_6]	1.99864	8.22	1	1	1	1	1.04757e+08	146	16.8987	11.063
	A2	Sequence	# PSMs	# Proteins	# Protein Groups	Protein Group Accessions	Modifications	ΔCn	Area	XCorr	Charge	MH+ [Da]	ΔM [ppm]	RT [min]	# Missed Cleavages
	High	CQmKSFRITIDK	1	1	1	unk	M3(Oxidation)	0	1.04757e+08	1.99864	2	1485.76	3.03341	30.6104	2
unk	len=2379 - [Mii71524_c0_g1_i1_1]	1.9985	1.39	1	1	1	1	13172208	793	89.5334	9.70068
	A2	Sequence	# PSMs	# Proteins	# Protein Groups	Protein Group Accessions	Modifications	ΔCn	Area	XCorr	Charge	MH+ [Da]	ΔM [ppm]	RT [min]	# Missed Cleavages
	High	NKSIEIDTNIR	1	1	1	unk		0	13172208	1.9985	2	1302.71	2.87276	27.6574	1

## Sheet: footprints intact animals 3
Accession	Description	Score	Coverage	# Proteins	# Unique Peptides	# Peptides	# PSMs	Area	# AAs	MW [kDa]	calc. pI
unk	len=1034 - [Mii61805_c3_g1_i1_5]	50.2914	19.19	1	0	5	14	2.6022e+08	344	37.1517	7.41553
	A2	Sequence	# PSMs	# Proteins	# Protein Groups	Protein Group Accessions	Modifications	ΔCn	Area	XCorr	Charge	MH+ [Da]	ΔM [ppm]	RT [min]	# Missed Cleavages
	High	AGYAAGVAcDSGTNNAEcK	5	34	34	unk	C9(Carbamidomethyl); C18(Carbamidomethyl)	0	8.60235e+07	5.04603	2	1915.79	2.07756	23.8629	0
	High	VNcDLKTcQDGSSTAHQVIK	1	34	34	unk	C3(Carbamidomethyl); C8(Carbamidomethyl)	0	6.04997e+07	4.54402	4	2261.07	2.2059	24.0198	1
	High	VYRDIVNAVSTK	5	34	34	unk		0	3.75593e+08	3.86734	3	1364.75	0.0954777	29.2338	1
	High	cTIEPAYTSGDAFTK	2	34	34	unk	C1(Carbamidomethyl)	0	3.19044e+08	3.2861	2	1660.75	0.803495	32.6109	0
	High	TcQDGSSTAHQVIK	1	34	34	unk	C2(Carbamidomethyl)	0	0	2.7462	3	1531.72	1.23417	19.7492	0
unk	len=1021 - [Mii61805_c3_g2_i1_4]	50.2914	19.41	1	0	5	14	2.6022e+08	340	36.5984	6.72705
	A2	Sequence	# PSMs	# Proteins	# Protein Groups	Protein Group Accessions	Modifications	ΔCn	Area	XCorr	Charge	MH+ [Da]	ΔM [ppm]	RT [min]	# Missed Cleavages
	High	AGYAAGVAcDSGTNNAEcK	5	34	34	unk	C9(Carbamidomethyl); C18(Carbamidomethyl)	0	8.60235e+07	5.04603	2	1915.79	2.07756	23.8629	0
	High	VNcDLKTcQDGSSTAHQVIK	1	34	34	unk	C3(Carbamidomethyl); C8(Carbamidomethyl)	0	6.04997e+07	4.54402	4	2261.07	2.2059	24.0198	1
	High	VYRDIVNAVSTK	5	34	34	unk		0	3.75593e+08	3.86734	3	1364.75	0.0954777	29.2338	1
	High	cTIEPAYTSGDAFTK	2	34	34	unk	C1(Carbamidomethyl)	0	3.19044e+08	3.2861	2	1660.75	0.803495	32.6109	0
	High	TcQDGSSTAHQVIK	1	34	34	unk	C2(Carbamidomethyl)	0	0	2.7462	3	1531.72	1.23417	19.7492	0
unk	len=1001 - [Mii61805_c3_g3_i1_5]	50.2914	19.82	1	0	5	14	2.6022e+08	333	35.752	6.96143
	A2	Sequence	# PSMs	# Proteins	# Protein Groups	Protein Group Accessions	Modifications	ΔCn	Area	XCorr	Charge	MH+ [Da]	ΔM [ppm]	RT [min]	# Missed Cleavages
	High	AGYAAGVAcDSGTNNAEcK	5	34	34	unk	C9(Carbamidomethyl); C18(Carbamidomethyl)	0	8.60235e+07	5.04603	2	1915.79	2.07756	23.8629	0
	High	VNcDLKTcQDGSSTAHQVIK	1	34	34	unk	C3(Carbamidomethyl); C8(Carbamidomethyl)	0	6.04997e+07	4.54402	4	2261.07	2.2059	24.0198	1
	High	VYRDIVNAVSTK	5	34	34	unk		0	3.75593e+08	3.86734	3	1364.75	0.0954777	29.2338	1
	High	cTIEPAYTSGDAFTK	2	34	34	unk	C1(Carbamidomethyl)	0	3.19044e+08	3.2861	2	1660.75	0.803495	32.6109	0
	High	TcQDGSSTAHQVIK	1	34	34	unk	C2(Carbamidomethyl)	0	0	2.7462	3	1531.72	1.23417	19.7492	0
unk	len=1021 - [Mii61805_c3_g4_i1_4]	50.2914	19.41	1	0	5	14	2.6022e+08	340	36.6985	6.96143
	A2	Sequence	# PSMs	# Proteins	# Protein Groups	Protein Group Accessions	Modifications	ΔCn	Area	XCorr	Charge	MH+ [Da]	ΔM [ppm]	RT [min]	# Missed Cleavages
	High	AGYAAGVAcDSGTNNAEcK	5	34	34	unk	C9(Carbamidomethyl); C18(Carbamidomethyl)	0	8.60235e+07	5.04603	2	1915.79	2.07756	23.8629	0
	High	VNcDLKTcQDGSSTAHQVIK	1	34	34	unk	C3(Carbamidomethyl); C8(Carbamidomethyl)	0	6.04997e+07	4.54402	4	2261.07	2.2059	24.0198	1
	High	VYRDIVNAVSTK	5	34	34	unk		0	3.75593e+08	3.86734	3	1364.75	0.0954777	29.2338	1
	High	cTIEPAYTSGDAFTK	2	34	34	unk	C1(Carbamidomethyl)	0	3.19044e+08	3.2861	2	1660.75	0.803495	32.6109	0
	High	TcQDGSSTAHQVIK	1	34	34	unk	C2(Carbamidomethyl)	0	0	2.7462	3	1531.72	1.23417	19.7492	0
unk	len=1024 - [Mii61805_c3_g5_i1_4]	50.2914	19.35	1	0	5	14	2.6022e+08	341	36.8096	7.1958
	A2	Sequence	# PSMs	# Proteins	# Protein Groups	Protein Group Accessions	Modifications	ΔCn	Area	XCorr	Charge	MH+ [Da]	ΔM [ppm]	RT [min]	# Missed Cleavages
	High	AGYAAGVAcDSGTNNAEcK	5	34	34	unk	C9(Carbamidomethyl); C18(Carbamidomethyl)	0	8.60235e+07	5.04603	2	1915.79	2.07756	23.8629	0
	High	VNcDLKTcQDGSSTAHQVIK	1	34	34	unk	C3(Carbamidomethyl); C8(Carbamidomethyl)	0	6.04997e+07	4.54402	4	2261.07	2.2059	24.0198	1
	High	VYRDIVNAVSTK	5	34	34	unk		0	3.75593e+08	3.86734	3	1364.75	0.0954777	29.2338	1
	High	cTIEPAYTSGDAFTK	2	34	34	unk	C1(Carbamidomethyl)	0	3.19044e+08	3.2861	2	1660.75	0.803495	32.6109	0
	High	TcQDGSSTAHQVIK	1	34	34	unk	C2(Carbamidomethyl)	0	0	2.7462	3	1531.72	1.23417	19.7492	0
unk	len=1024 - [Mii61805_c3_g6_i1_4]	50.2914	19.35	1	0	5	14	2.6022e+08	341	36.8676	7.1958
	A2	Sequence	# PSMs	# Proteins	# Protein Groups	Protein Group Accessions	Modifications	ΔCn	Area	XCorr	Charge	MH+ [Da]	ΔM [ppm]	RT [min]	# Missed Cleavages
	High	AGYAAGVAcDSGTNNAEcK	5	34	34	unk	C9(Carbamidomethyl); C18(Carbamidomethyl)	0	8.60235e+07	5.04603	2	1915.79	2.07756	23.8629	0
	High	VNcDLKTcQDGSSTAHQVIK	1	34	34	unk	C3(Carbamidomethyl); C8(Carbamidomethyl)	0	6.04997e+07	4.54402	4	2261.07	2.2059	24.0198	1
	High	VYRDIVNAVSTK	5	34	34	unk		0	3.75593e+08	3.86734	3	1364.75	0.0954777	29.2338	1
	High	cTIEPAYTSGDAFTK	2	34	34	unk	C1(Carbamidomethyl)	0	3.19044e+08	3.2861	2	1660.75	0.803495	32.6109	0
	High	TcQDGSSTAHQVIK	1	34	34	unk	C2(Carbamidomethyl)	0	0	2.7462	3	1531.72	1.23417	19.7492	0
unk	len=1024 - [Mii61805_c3_g7_i1_4]	50.2914	19.35	1	0	5	14	2.6022e+08	341	36.7955	7.1958
	A2	Sequence	# PSMs	# Proteins	# Protein Groups	Protein Group Accessions	Modifications	ΔCn	Area	XCorr	Charge	MH+ [Da]	ΔM [ppm]	RT [min]	# Missed Cleavages
	High	AGYAAGVAcDSGTNNAEcK	5	34	34	unk	C9(Carbamidomethyl); C18(Carbamidomethyl)	0	8.60235e+07	5.04603	2	1915.79	2.07756	23.8629	0
	High	VNcDLKTcQDGSSTAHQVIK	1	34	34	unk	C3(Carbamidomethyl); C8(Carbamidomethyl)	0	6.04997e+07	4.54402	4	2261.07	2.2059	24.0198	1
	High	VYRDIVNAVSTK	5	34	34	unk		0	3.75593e+08	3.86734	3	1364.75	0.0954777	29.2338	1
	High	cTIEPAYTSGDAFTK	2	34	34	unk	C1(Carbamidomethyl)	0	3.19044e+08	3.2861	2	1660.75	0.803495	32.6109	0
	High	TcQDGSSTAHQVIK	1	34	34	unk	C2(Carbamidomethyl)	0	0	2.7462	3	1531.72	1.23417	19.7492	0
unk	len=1021 - [Mii61805_c3_g8_i1_4]	50.2914	19.41	1	0	5	14	2.6022e+08	340	36.7005	6.96143
	A2	Sequence	# PSMs	# Proteins	# Protein Groups	Protein Group Accessions	Modifications	ΔCn	Area	XCorr	Charge	MH+ [Da]	ΔM [ppm]	RT [min]	# Missed Cleavages
	High	AGYAAGVAcDSGTNNAEcK	5	34	34	unk	C9(Carbamidomethyl); C18(Carbamidomethyl)	0	8.60235e+07	5.04603	2	1915.79	2.07756	23.8629	0
	High	VNcDLKTcQDGSSTAHQVIK	1	34	34	unk	C3(Carbamidomethyl); C8(Carbamidomethyl)	0	6.04997e+07	4.54402	4	2261.07	2.2059	24.0198	1
	High	VYRDIVNAVSTK	5	34	34	unk		0	3.75593e+08	3.86734	3	1364.75	0.0954777	29.2338	1
	High	cTIEPAYTSGDAFTK	2	34	34	unk	C1(Carbamidomethyl)	0	3.19044e+08	3.2861	2	1660.75	0.803495	32.6109	0
	High	TcQDGSSTAHQVIK	1	34	34	unk	C2(Carbamidomethyl)	0	0	2.7462	3	1531.72	1.23417	19.7492	0
unk	len=1021 - [Mii61805_c3_g9_i1_4]	50.2914	19.41	1	0	5	14	2.6022e+08	340	36.6014	6.72705
	A2	Sequence	# PSMs	# Proteins	# Protein Groups	Protein Group Accessions	Modifications	ΔCn	Area	XCorr	Charge	MH+ [Da]	ΔM [ppm]	RT [min]	# Missed Cleavages
	High	AGYAAGVAcDSGTNNAEcK	5	34	34	unk	C9(Carbamidomethyl); C18(Carbamidomethyl)	0	8.60235e+07	5.04603	2	1915.79	2.07756	23.8629	0
	High	VNcDLKTcQDGSSTAHQVIK	1	34	34	unk	C3(Carbamidomethyl); C8(Carbamidomethyl)	0	6.04997e+07	4.54402	4	2261.07	2.2059	24.0198	1
	High	VYRDIVNAVSTK	5	34	34	unk		0	3.75593e+08	3.86734	3	1364.75	0.0954777	29.2338	1
	High	cTIEPAYTSGDAFTK	2	34	34	unk	C1(Carbamidomethyl)	0	3.19044e+08	3.2861	2	1660.75	0.803495	32.6109	0
	High	TcQDGSSTAHQVIK	1	34	34	unk	C2(Carbamidomethyl)	0	0	2.7462	3	1531.72	1.23417	19.7492	0
unk	len=1024 - [Mii61805_c3_g10_i1_4]	50.2914	19.35	1	0	5	14	2.6022e+08	341	36.7965	6.96143
	A2	Sequence	# PSMs	# Proteins	# Protein Groups	Protein Group Accessions	Modifications	ΔCn	Area	XCorr	Charge	MH+ [Da]	ΔM [ppm]	RT [min]	# Missed Cleavages
	High	AGYAAGVAcDSGTNNAEcK	5	34	34	unk	C9(Carbamidomethyl); C18(Carbamidomethyl)	0	8.60235e+07	5.04603	2	1915.79	2.07756	23.8629	0
	High	VNcDLKTcQDGSSTAHQVIK	1	34	34	unk	C3(Carbamidomethyl); C8(Carbamidomethyl)	0	6.04997e+07	4.54402	4	2261.07	2.2059	24.0198	1
	High	VYRDIVNAVSTK	5	34	34	unk		0	3.75593e+08	3.86734	3	1364.75	0.0954777	29.2338	1
	High	cTIEPAYTSGDAFTK	2	34	34	unk	C1(Carbamidomethyl)	0	3.19044e+08	3.2861	2	1660.75	0.803495	32.6109	0
	High	TcQDGSSTAHQVIK	1	34	34	unk	C2(Carbamidomethyl)	0	0	2.7462	3	1531.72	1.23417	19.7492	0
unk	len=1039 - [Mii61805_c3_g11_i1_4]	50.2914	19.08	1	0	5	14	2.6022e+08	346	37.4088	7.1958
	A2	Sequence	# PSMs	# Proteins	# Protein Groups	Protein Group Accessions	Modifications	ΔCn	Area	XCorr	Charge	MH+ [Da]	ΔM [ppm]	RT [min]	# Missed Cleavages
	High	AGYAAGVAcDSGTNNAEcK	5	34	34	unk	C9(Carbamidomethyl); C18(Carbamidomethyl)	0	8.60235e+07	5.04603	2	1915.79	2.07756	23.8629	0
	High	VNcDLKTcQDGSSTAHQVIK	1	34	34	unk	C3(Carbamidomethyl); C8(Carbamidomethyl)	0	6.04997e+07	4.54402	4	2261.07	2.2059	24.0198	1
	High	VYRDIVNAVSTK	5	34	34	unk		0	3.75593e+08	3.86734	3	1364.75	0.0954777	29.2338	1
	High	cTIEPAYTSGDAFTK	2	34	34	unk	C1(Carbamidomethyl)	0	3.19044e+08	3.2861	2	1660.75	0.803495	32.6109	0
	High	TcQDGSSTAHQVIK	1	34	34	unk	C2(Carbamidomethyl)	0	0	2.7462	3	1531.72	1.23417	19.7492	0
unk	len=1021 - [Mii61805_c3_g12_i1_4]	50.2914	19.41	1	0	5	14	2.6022e+08	340	36.5974	6.96143
	A2	Sequence	# PSMs	# Proteins	# Protein Groups	Protein Group Accessions	Modifications	ΔCn	Area	XCorr	Charge	MH+ [Da]	ΔM [ppm]	RT [min]	# Missed Cleavages
	High	AGYAAGVAcDSGTNNAEcK	5	34	34	unk	C9(Carbamidomethyl); C18(Carbamidomethyl)	0	8.60235e+07	5.04603	2	1915.79	2.07756	23.8629	0
	High	VNcDLKTcQDGSSTAHQVIK	1	34	34	unk	C3(Carbamidomethyl); C8(Carbamidomethyl)	0	6.04997e+07	4.54402	4	2261.07	2.2059	24.0198	1
	High	VYRDIVNAVSTK	5	34	34	unk		0	3.75593e+08	3.86734	3	1364.75	0.0954777	29.2338	1
	High	cTIEPAYTSGDAFTK	2	34	34	unk	C1(Carbamidomethyl)	0	3.19044e+08	3.2861	2	1660.75	0.803495	32.6109	0
	High	TcQDGSSTAHQVIK	1	34	34	unk	C2(Carbamidomethyl)	0	0	2.7462	3	1531.72	1.23417	19.7492	0
unk	len=1015 - [Mii61805_c3_g13_i1_4]	50.2914	19.53	1	0	5	14	2.6022e+08	338	36.4674	6.96143
	A2	Sequence	# PSMs	# Proteins	# Protein Groups	Protein Group Accessions	Modifications	ΔCn	Area	XCorr	Charge	MH+ [Da]	ΔM [ppm]	RT [min]	# Missed Cleavages
	High	AGYAAGVAcDSGTNNAEcK	5	34	34	unk	C9(Carbamidomethyl); C18(Carbamidomethyl)	0	8.60235e+07	5.04603	2	1915.79	2.07756	23.8629	0
	High	VNcDLKTcQDGSSTAHQVIK	1	34	34	unk	C3(Carbamidomethyl); C8(Carbamidomethyl)	0	6.04997e+07	4.54402	4	2261.07	2.2059	24.0198	1
	High	VYRDIVNAVSTK	5	34	34	unk		0	3.75593e+08	3.86734	3	1364.75	0.0954777	29.2338	1
	High	cTIEPAYTSGDAFTK	2	34	34	unk	C1(Carbamidomethyl)	0	3.19044e+08	3.2861	2	1660.75	0.803495	32.6109	0
	High	TcQDGSSTAHQVIK	1	34	34	unk	C2(Carbamidomethyl)	0	0	2.7462	3	1531.72	1.23417	19.7492	0
unk	len=1024 - [Mii61805_c3_g14_i1_4]	50.2914	19.35	1	0	5	14	2.6022e+08	341	36.8376	7.1958
	A2	Sequence	# PSMs	# Proteins	# Protein Groups	Protein Group Accessions	Modifications	ΔCn	Area	XCorr	Charge	MH+ [Da]	ΔM [ppm]	RT [min]	# Missed Cleavages
	High	AGYAAGVAcDSGTNNAEcK	5	34	34	unk	C9(Carbamidomethyl); C18(Carbamidomethyl)	0	8.60235e+07	5.04603	2	1915.79	2.07756	23.8629	0
	High	VNcDLKTcQDGSSTAHQVIK	1	34	34	unk	C3(Carbamidomethyl); C8(Carbamidomethyl)	0	6.04997e+07	4.54402	4	2261.07	2.2059	24.0198	1
	High	VYRDIVNAVSTK	5	34	34	unk		0	3.75593e+08	3.86734	3	1364.75	0.0954777	29.2338	1
	High	cTIEPAYTSGDAFTK	2	34	34	unk	C1(Carbamidomethyl)	0	3.19044e+08	3.2861	2	1660.75	0.803495	32.6109	0
	High	TcQDGSSTAHQVIK	1	34	34	unk	C2(Carbamidomethyl)	0	0	2.7462	3	1531.72	1.23417	19.7492	0
unk	len=1021 - [Mii61805_c3_g16_i1_4]	50.2914	19.41	1	0	5	14	2.6022e+08	340	36.6294	6.72705
	A2	Sequence	# PSMs	# Proteins	# Protein Groups	Protein Group Accessions	Modifications	ΔCn	Area	XCorr	Charge	MH+ [Da]	ΔM [ppm]	RT [min]	# Missed Cleavages
	High	AGYAAGVAcDSGTNNAEcK	5	34	34	unk	C9(Carbamidomethyl); C18(Carbamidomethyl)	0	8.60235e+07	5.04603	2	1915.79	2.07756	23.8629	0
	High	VNcDLKTcQDGSSTAHQVIK	1	34	34	unk	C3(Carbamidomethyl); C8(Carbamidomethyl)	0	6.04997e+07	4.54402	4	2261.07	2.2059	24.0198	1
	High	VYRDIVNAVSTK	5	34	34	unk		0	3.75593e+08	3.86734	3	1364.75	0.0954777	29.2338	1
	High	cTIEPAYTSGDAFTK	2	34	34	unk	C1(Carbamidomethyl)	0	3.19044e+08	3.2861	2	1660.75	0.803495	32.6109	0
	High	TcQDGSSTAHQVIK	1	34	34	unk	C2(Carbamidomethyl)	0	0	2.7462	3	1531.72	1.23417	19.7492	0
unk	len=1021 - [Mii61805_c3_g17_i1_4]	50.2914	19.41	1	0	5	14	2.6022e+08	340	36.7015	6.96143
	A2	Sequence	# PSMs	# Proteins	# Protein Groups	Protein Group Accessions	Modifications	ΔCn	Area	XCorr	Charge	MH+ [Da]	ΔM [ppm]	RT [min]	# Missed Cleavages
	High	AGYAAGVAcDSGTNNAEcK	5	34	34	unk	C9(Carbamidomethyl); C18(Carbamidomethyl)	0	8.60235e+07	5.04603	2	1915.79	2.07756	23.8629	0
	High	VNcDLKTcQDGSSTAHQVIK	1	34	34	unk	C3(Carbamidomethyl); C8(Carbamidomethyl)	0	6.04997e+07	4.54402	4	2261.07	2.2059	24.0198	1
	High	VYRDIVNAVSTK	5	34	34	unk		0	3.75593e+08	3.86734	3	1364.75	0.0954777	29.2338	1
	High	cTIEPAYTSGDAFTK	2	34	34	unk	C1(Carbamidomethyl)	0	3.19044e+08	3.2861	2	1660.75	0.803495	32.6109	0
	High	TcQDGSSTAHQVIK	1	34	34	unk	C2(Carbamidomethyl)	0	0	2.7462	3	1531.72	1.23417	19.7492	0
unk	len=1021 - [Mii61805_c3_g19_i1_4]	50.2914	19.41	1	0	5	14	2.6022e+08	340	36.6254	6.96143
	A2	Sequence	# PSMs	# Proteins	# Protein Groups	Protein Group Accessions	Modifications	ΔCn	Area	XCorr	Charge	MH+ [Da]	ΔM [ppm]	RT [min]	# Missed Cleavages
	High	AGYAAGVAcDSGTNNAEcK	5	34	34	unk	C9(Carbamidomethyl); C18(Carbamidomethyl)	0	8.60235e+07	5.04603	2	1915.79	2.07756	23.8629	0
	High	VNcDLKTcQDGSSTAHQVIK	1	34	34	unk	C3(Carbamidomethyl); C8(Carbamidomethyl)	0	6.04997e+07	4.54402	4	2261.07	2.2059	24.0198	1
	High	VYRDIVNAVSTK	5	34	34	unk		0	3.75593e+08	3.86734	3	1364.75	0.0954777	29.2338	1
	High	cTIEPAYTSGDAFTK	2	34	34	unk	C1(Carbamidomethyl)	0	3.19044e+08	3.2861	2	1660.75	0.803495	32.6109	0
	High	TcQDGSSTAHQVIK	1	34	34	unk	C2(Carbamidomethyl)	0	0	2.7462	3	1531.72	1.23417	19.7492	0
unk	len=1021 - [Mii61805_c3_g20_i1_4]	50.2914	19.41	1	0	5	14	2.6022e+08	340	36.6714	6.72705
	A2	Sequence	# PSMs	# Proteins	# Protein Groups	Protein Group Accessions	Modifications	ΔCn	Area	XCorr	Charge	MH+ [Da]	ΔM [ppm]	RT [min]	# Missed Cleavages
	High	AGYAAGVAcDSGTNNAEcK	5	34	34	unk	C9(Carbamidomethyl); C18(Carbamidomethyl)	0	8.60235e+07	5.04603	2	1915.79	2.07756	23.8629	0
	High	VNcDLKTcQDGSSTAHQVIK	1	34	34	unk	C3(Carbamidomethyl); C8(Carbamidomethyl)	0	6.04997e+07	4.54402	4	2261.07	2.2059	24.0198	1
	High	VYRDIVNAVSTK	5	34	34	unk		0	3.75593e+08	3.86734	3	1364.75	0.0954777	29.2338	1
	High	cTIEPAYTSGDAFTK	2	34	34	unk	C1(Carbamidomethyl)	0	3.19044e+08	3.2861	2	1660.75	0.803495	32.6109	0
	High	TcQDGSSTAHQVIK	1	34	34	unk	C2(Carbamidomethyl)	0	0	2.7462	3	1531.72	1.23417	19.7492	0
unk	len=1024 - [Mii61805_c3_g21_i1_4]	50.2914	19.35	1	0	5	14	2.6022e+08	341	36.8396	7.1958
	A2	Sequence	# PSMs	# Proteins	# Protein Groups	Protein Group Accessions	Modifications	ΔCn	Area	XCorr	Charge	MH+ [Da]	ΔM [ppm]	RT [min]	# Missed Cleavages
	High	AGYAAGVAcDSGTNNAEcK	5	34	34	unk	C9(Carbamidomethyl); C18(Carbamidomethyl)	0	8.60235e+07	5.04603	2	1915.79	2.07756	23.8629	0
	High	VNcDLKTcQDGSSTAHQVIK	1	34	34	unk	C3(Carbamidomethyl); C8(Carbamidomethyl)	0	6.04997e+07	4.54402	4	2261.07	2.2059	24.0198	1
	High	VYRDIVNAVSTK	5	34	34	unk		0	3.75593e+08	3.86734	3	1364.75	0.0954777	29.2338	1
	High	cTIEPAYTSGDAFTK	2	34	34	unk	C1(Carbamidomethyl)	0	3.19044e+08	3.2861	2	1660.75	0.803495	32.6109	0
	High	TcQDGSSTAHQVIK	1	34	34	unk	C2(Carbamidomethyl)	0	0	2.7462	3	1531.72	1.23417	19.7492	0
unk	len=1021 - [Mii61805_c3_g22_i1_4]	50.2914	19.41	1	0	5	14	2.6022e+08	340	36.6705	6.96143
	A2	Sequence	# PSMs	# Proteins	# Protein Groups	Protein Group Accessions	Modifications	ΔCn	Area	XCorr	Charge	MH+ [Da]	ΔM [ppm]	RT [min]	# Missed Cleavages
	High	AGYAAGVAcDSGTNNAEcK	5	34	34	unk	C9(Carbamidomethyl); C18(Carbamidomethyl)	0	8.60235e+07	5.04603	2	1915.79	2.07756	23.8629	0
	High	VNcDLKTcQDGSSTAHQVIK	1	34	34	unk	C3(Carbamidomethyl); C8(Carbamidomethyl)	0	6.04997e+07	4.54402	4	2261.07	2.2059	24.0198	1
	High	VYRDIVNAVSTK	5	34	34	unk		0	3.75593e+08	3.86734	3	1364.75	0.0954777	29.2338	1
	High	cTIEPAYTSGDAFTK	2	34	34	unk	C1(Carbamidomethyl)	0	3.19044e+08	3.2861	2	1660.75	0.803495	32.6109	0
	High	TcQDGSSTAHQVIK	1	34	34	unk	C2(Carbamidomethyl)	0	0	2.7462	3	1531.72	1.23417	19.7492	0
unk	len=987 - [Mii61805_c3_g23_i1_6]	50.2914	20.12	1	0	5	14	2.6022e+08	328	35.2687	6.96143
	A2	Sequence	# PSMs	# Proteins	# Protein Groups	Protein Group Accessions	Modifications	ΔCn	Area	XCorr	Charge	MH+ [Da]	ΔM [ppm]	RT [min]	# Missed Cleavages
	High	AGYAAGVAcDSGTNNAEcK	5	34	34	unk	C9(Carbamidomethyl); C18(Carbamidomethyl)	0	8.60235e+07	5.04603	2	1915.79	2.07756	23.8629	0
	High	VNcDLKTcQDGSSTAHQVIK	1	34	34	unk	C3(Carbamidomethyl); C8(Carbamidomethyl)	0	6.04997e+07	4.54402	4	2261.07	2.2059	24.0198	1
	High	VYRDIVNAVSTK	5	34	34	unk		0	3.75593e+08	3.86734	3	1364.75	0.0954777	29.2338	1
	High	cTIEPAYTSGDAFTK	2	34	34	unk	C1(Carbamidomethyl)	0	3.19044e+08	3.2861	2	1660.75	0.803495	32.6109	0
	High	TcQDGSSTAHQVIK	1	34	34	unk	C2(Carbamidomethyl)	0	0	2.7462	3	1531.72	1.23417	19.7492	0
unk	len=1034 - [Mii61805_c3_g24_i1_5]	50.2914	19.19	1	0	5	14	2.6022e+08	344	37.1527	7.1958
	A2	Sequence	# PSMs	# Proteins	# Protein Groups	Protein Group Accessions	Modifications	ΔCn	Area	XCorr	Charge	MH+ [Da]	ΔM [ppm]	RT [min]	# Missed Cleavages
	High	AGYAAGVAcDSGTNNAEcK	5	34	34	unk	C9(Carbamidomethyl); C18(Carbamidomethyl)	0	8.60235e+07	5.04603	2	1915.79	2.07756	23.8629	0
	High	VNcDLKTcQDGSSTAHQVIK	1	34	34	unk	C3(Carbamidomethyl); C8(Carbamidomethyl)	0	6.04997e+07	4.54402	4	2261.07	2.2059	24.0198	1
	High	VYRDIVNAVSTK	5	34	34	unk		0	3.75593e+08	3.86734	3	1364.75	0.0954777	29.2338	1
	High	cTIEPAYTSGDAFTK	2	34	34	unk	C1(Carbamidomethyl)	0	3.19044e+08	3.2861	2	1660.75	0.803495	32.6109	0
	High	TcQDGSSTAHQVIK	1	34	34	unk	C2(Carbamidomethyl)	0	0	2.7462	3	1531.72	1.23417	19.7492	0
unk	len=1021 - [Mii61805_c3_g27_i1_4]	50.2914	19.41	1	0	5	14	2.6022e+08	340	36.6024	6.72705
	A2	Sequence	# PSMs	# Proteins	# Protein Groups	Protein Group Accessions	Modifications	ΔCn	Area	XCorr	Charge	MH+ [Da]	ΔM [ppm]	RT [min]	# Missed Cleavages
	High	AGYAAGVAcDSGTNNAEcK	5	34	34	unk	C9(Carbamidomethyl); C18(Carbamidomethyl)	0	8.60235e+07	5.04603	2	1915.79	2.07756	23.8629	0
	High	VNcDLKTcQDGSSTAHQVIK	1	34	34	unk	C3(Carbamidomethyl); C8(Carbamidomethyl)	0	6.04997e+07	4.54402	4	2261.07	2.2059	24.0198	1
	High	VYRDIVNAVSTK	5	34	34	unk		0	3.75593e+08	3.86734	3	1364.75	0.0954777	29.2338	1
	High	cTIEPAYTSGDAFTK	2	34	34	unk	C1(Carbamidomethyl)	0	3.19044e+08	3.2861	2	1660.75	0.803495	32.6109	0
	High	TcQDGSSTAHQVIK	1	34	34	unk	C2(Carbamidomethyl)	0	0	2.7462	3	1531.72	1.23417	19.7492	0
unk	len=1034 - [Mii61805_c3_g29_i1_5]	50.2914	19.19	1	0	5	14	2.6022e+08	344	37.1817	7.41553
	A2	Sequence	# PSMs	# Proteins	# Protein Groups	Protein Group Accessions	Modifications	ΔCn	Area	XCorr	Charge	MH+ [Da]	ΔM [ppm]	RT [min]	# Missed Cleavages
	High	AGYAAGVAcDSGTNNAEcK	5	34	34	unk	C9(Carbamidomethyl); C18(Carbamidomethyl)	0	8.60235e+07	5.04603	2	1915.79	2.07756	23.8629	0
	High	VNcDLKTcQDGSSTAHQVIK	1	34	34	unk	C3(Carbamidomethyl); C8(Carbamidomethyl)	0	6.04997e+07	4.54402	4	2261.07	2.2059	24.0198	1
	High	VYRDIVNAVSTK	5	34	34	unk		0	3.75593e+08	3.86734	3	1364.75	0.0954777	29.2338	1
	High	cTIEPAYTSGDAFTK	2	34	34	unk	C1(Carbamidomethyl)	0	3.19044e+08	3.2861	2	1660.75	0.803495	32.6109	0
	High	TcQDGSSTAHQVIK	1	34	34	unk	C2(Carbamidomethyl)	0	0	2.7462	3	1531.72	1.23417	19.7492	0
unk	len=1021 - [Mii61805_c3_g31_i1_4]	50.2914	19.41	1	0	5	14	2.6022e+08	340	36.7285	6.96143
	A2	Sequence	# PSMs	# Proteins	# Protein Groups	Protein Group Accessions	Modifications	ΔCn	Area	XCorr	Charge	MH+ [Da]	ΔM [ppm]	RT [min]	# Missed Cleavages
	High	AGYAAGVAcDSGTNNAEcK	5	34	34	unk	C9(Carbamidomethyl); C18(Carbamidomethyl)	0	8.60235e+07	5.04603	2	1915.79	2.07756	23.8629	0
	High	VNcDLKTcQDGSSTAHQVIK	1	34	34	unk	C3(Carbamidomethyl); C8(Carbamidomethyl)	0	6.04997e+07	4.54402	4	2261.07	2.2059	24.0198	1
	High	VYRDIVNAVSTK	5	34	34	unk		0	3.75593e+08	3.86734	3	1364.75	0.0954777	29.2338	1
	High	cTIEPAYTSGDAFTK	2	34	34	unk	C1(Carbamidomethyl)	0	3.19044e+08	3.2861	2	1660.75	0.803495	32.6109	0
	High	TcQDGSSTAHQVIK	1	34	34	unk	C2(Carbamidomethyl)	0	0	2.7462	3	1531.72	1.23417	19.7492	0
unk	len=1034 - [Mii61805_c3_g32_i1_5]	50.2914	19.19	1	0	5	14	2.6022e+08	344	37.2097	7.41553
	A2	Sequence	# PSMs	# Proteins	# Protein Groups	Protein Group Accessions	Modifications	ΔCn	Area	XCorr	Charge	MH+ [Da]	ΔM [ppm]	RT [min]	# Missed Cleavages
	High	AGYAAGVAcDSGTNNAEcK	5	34	34	unk	C9(Carbamidomethyl); C18(Carbamidomethyl)	0	8.60235e+07	5.04603	2	1915.79	2.07756	23.8629	0
	High	VNcDLKTcQDGSSTAHQVIK	1	34	34	unk	C3(Carbamidomethyl); C8(Carbamidomethyl)	0	6.04997e+07	4.54402	4	2261.07	2.2059	24.0198	1
	High	VYRDIVNAVSTK	5	34	34	unk		0	3.75593e+08	3.86734	3	1364.75	0.0954777	29.2338	1
	High	cTIEPAYTSGDAFTK	2	34	34	unk	C1(Carbamidomethyl)	0	3.19044e+08	3.2861	2	1660.75	0.803495	32.6109	0
	High	TcQDGSSTAHQVIK	1	34	34	unk	C2(Carbamidomethyl)	0	0	2.7462	3	1531.72	1.23417	19.7492	0
unk	len=1024 - [Mii61805_c3_g33_i1_4]	50.2914	19.35	1	0	5	14	2.6022e+08	341	36.8105	6.96143
	A2	Sequence	# PSMs	# Proteins	# Protein Groups	Protein Group Accessions	Modifications	ΔCn	Area	XCorr	Charge	MH+ [Da]	ΔM [ppm]	RT [min]	# Missed Cleavages
	High	AGYAAGVAcDSGTNNAEcK	5	34	34	unk	C9(Carbamidomethyl); C18(Carbamidomethyl)	0	8.60235e+07	5.04603	2	1915.79	2.07756	23.8629	0
	High	VNcDLKTcQDGSSTAHQVIK	1	34	34	unk	C3(Carbamidomethyl); C8(Carbamidomethyl)	0	6.04997e+07	4.54402	4	2261.07	2.2059	24.0198	1
	High	VYRDIVNAVSTK	5	34	34	unk		0	3.75593e+08	3.86734	3	1364.75	0.0954777	29.2338	1
	High	cTIEPAYTSGDAFTK	2	34	34	unk	C1(Carbamidomethyl)	0	3.19044e+08	3.2861	2	1660.75	0.803495	32.6109	0
	High	TcQDGSSTAHQVIK	1	34	34	unk	C2(Carbamidomethyl)	0	0	2.7462	3	1531.72	1.23417	19.7492	0
unk	len=1039 - [Mii61805_c3_g36_i1_4]	50.2914	19.08	1	0	5	14	2.6022e+08	346	37.4388	7.1958
	A2	Sequence	# PSMs	# Proteins	# Protein Groups	Protein Group Accessions	Modifications	ΔCn	Area	XCorr	Charge	MH+ [Da]	ΔM [ppm]	RT [min]	# Missed Cleavages
	High	AGYAAGVAcDSGTNNAEcK	5	34	34	unk	C9(Carbamidomethyl); C18(Carbamidomethyl)	0	8.60235e+07	5.04603	2	1915.79	2.07756	23.8629	0
	High	VNcDLKTcQDGSSTAHQVIK	1	34	34	unk	C3(Carbamidomethyl); C8(Carbamidomethyl)	0	6.04997e+07	4.54402	4	2261.07	2.2059	24.0198	1
	High	VYRDIVNAVSTK	5	34	34	unk		0	3.75593e+08	3.86734	3	1364.75	0.0954777	29.2338	1
	High	cTIEPAYTSGDAFTK	2	34	34	unk	C1(Carbamidomethyl)	0	3.19044e+08	3.2861	2	1660.75	0.803495	32.6109	0
	High	TcQDGSSTAHQVIK	1	34	34	unk	C2(Carbamidomethyl)	0	0	2.7462	3	1531.72	1.23417	19.7492	0
unk	len=1039 - [Mii61805_c3_g37_i1_4]	50.2914	19.08	1	0	5	14	2.6022e+08	346	37.4668	7.1958
	A2	Sequence	# PSMs	# Proteins	# Protein Groups	Protein Group Accessions	Modifications	ΔCn	Area	XCorr	Charge	MH+ [Da]	ΔM [ppm]	RT [min]	# Missed Cleavages
	High	AGYAAGVAcDSGTNNAEcK	5	34	34	unk	C9(Carbamidomethyl); C18(Carbamidomethyl)	0	8.60235e+07	5.04603	2	1915.79	2.07756	23.8629	0
	High	VNcDLKTcQDGSSTAHQVIK	1	34	34	unk	C3(Carbamidomethyl); C8(Carbamidomethyl)	0	6.04997e+07	4.54402	4	2261.07	2.2059	24.0198	1
	High	VYRDIVNAVSTK	5	34	34	unk		0	3.75593e+08	3.86734	3	1364.75	0.0954777	29.2338	1
	High	cTIEPAYTSGDAFTK	2	34	34	unk	C1(Carbamidomethyl)	0	3.19044e+08	3.2861	2	1660.75	0.803495	32.6109	0
	High	TcQDGSSTAHQVIK	1	34	34	unk	C2(Carbamidomethyl)	0	0	2.7462	3	1531.72	1.23417	19.7492	0
unk	len=1034 - [Mii61805_c3_g38_i1_5]	50.2914	19.19	1	0	5	14	2.6022e+08	344	37.1827	7.41553
	A2	Sequence	# PSMs	# Proteins	# Protein Groups	Protein Group Accessions	Modifications	ΔCn	Area	XCorr	Charge	MH+ [Da]	ΔM [ppm]	RT [min]	# Missed Cleavages
	High	AGYAAGVAcDSGTNNAEcK	5	34	34	unk	C9(Carbamidomethyl); C18(Carbamidomethyl)	0	8.60235e+07	5.04603	2	1915.79	2.07756	23.8629	0
	High	VNcDLKTcQDGSSTAHQVIK	1	34	34	unk	C3(Carbamidomethyl); C8(Carbamidomethyl)	0	6.04997e+07	4.54402	4	2261.07	2.2059	24.0198	1
	High	VYRDIVNAVSTK	5	34	34	unk		0	3.75593e+08	3.86734	3	1364.75	0.0954777	29.2338	1
	High	cTIEPAYTSGDAFTK	2	34	34	unk	C1(Carbamidomethyl)	0	3.19044e+08	3.2861	2	1660.75	0.803495	32.6109	0
	High	TcQDGSSTAHQVIK	1	34	34	unk	C2(Carbamidomethyl)	0	0	2.7462	3	1531.72	1.23417	19.7492	0
unk	len=1024 - [Mii61805_c3_g39_i1_4]	50.2914	19.35	1	0	5	14	2.6022e+08	341	36.8406	7.1958
	A2	Sequence	# PSMs	# Proteins	# Protein Groups	Protein Group Accessions	Modifications	ΔCn	Area	XCorr	Charge	MH+ [Da]	ΔM [ppm]	RT [min]	# Missed Cleavages
	High	AGYAAGVAcDSGTNNAEcK	5	34	34	unk	C9(Carbamidomethyl); C18(Carbamidomethyl)	0	8.60235e+07	5.04603	2	1915.79	2.07756	23.8629	0
	High	VNcDLKTcQDGSSTAHQVIK	1	34	34	unk	C3(Carbamidomethyl); C8(Carbamidomethyl)	0	6.04997e+07	4.54402	4	2261.07	2.2059	24.0198	1
	High	VYRDIVNAVSTK	5	34	34	unk		0	3.75593e+08	3.86734	3	1364.75	0.0954777	29.2338	1
	High	cTIEPAYTSGDAFTK	2	34	34	unk	C1(Carbamidomethyl)	0	3.19044e+08	3.2861	2	1660.75	0.803495	32.6109	0
	High	TcQDGSSTAHQVIK	1	34	34	unk	C2(Carbamidomethyl)	0	0	2.7462	3	1531.72	1.23417	19.7492	0
unk	len=1024 - [Mii61805_c3_g45_i1_4]	50.2914	19.35	1	0	5	14	2.6022e+08	341	36.8236	7.1958
	A2	Sequence	# PSMs	# Proteins	# Protein Groups	Protein Group Accessions	Modifications	ΔCn	Area	XCorr	Charge	MH+ [Da]	ΔM [ppm]	RT [min]	# Missed Cleavages
	High	AGYAAGVAcDSGTNNAEcK	5	34	34	unk	C9(Carbamidomethyl); C18(Carbamidomethyl)	0	8.60235e+07	5.04603	2	1915.79	2.07756	23.8629	0
	High	VNcDLKTcQDGSSTAHQVIK	1	34	34	unk	C3(Carbamidomethyl); C8(Carbamidomethyl)	0	6.04997e+07	4.54402	4	2261.07	2.2059	24.0198	1
	High	VYRDIVNAVSTK	5	34	34	unk		0	3.75593e+08	3.86734	3	1364.75	0.0954777	29.2338	1
	High	cTIEPAYTSGDAFTK	2	34	34	unk	C1(Carbamidomethyl)	0	3.19044e+08	3.2861	2	1660.75	0.803495	32.6109	0
	High	TcQDGSSTAHQVIK	1	34	34	unk	C2(Carbamidomethyl)	0	0	2.7462	3	1531.72	1.23417	19.7492	0
unk	len=1034 - [Mii61805_c3_g46_i1_5]	50.2914	19.19	1	0	5	14	2.6022e+08	344	37.1797	7.41553
	A2	Sequence	# PSMs	# Proteins	# Protein Groups	Protein Group Accessions	Modifications	ΔCn	Area	XCorr	Charge	MH+ [Da]	ΔM [ppm]	RT [min]	# Missed Cleavages
	High	AGYAAGVAcDSGTNNAEcK	5	34	34	unk	C9(Carbamidomethyl); C18(Carbamidomethyl)	0	8.60235e+07	5.04603	2	1915.79	2.07756	23.8629	0
	High	VNcDLKTcQDGSSTAHQVIK	1	34	34	unk	C3(Carbamidomethyl); C8(Carbamidomethyl)	0	6.04997e+07	4.54402	4	2261.07	2.2059	24.0198	1
	High	VYRDIVNAVSTK	5	34	34	unk		0	3.75593e+08	3.86734	3	1364.75	0.0954777	29.2338	1
	High	cTIEPAYTSGDAFTK	2	34	34	unk	C1(Carbamidomethyl)	0	3.19044e+08	3.2861	2	1660.75	0.803495	32.6109	0
	High	TcQDGSSTAHQVIK	1	34	34	unk	C2(Carbamidomethyl)	0	0	2.7462	3	1531.72	1.23417	19.7492	0
unk	len=913 - [Mii65436_c1_g1_i1_2]	50.2914	21.71	1	0	5	14	2.6022e+08	304	32.3014	7.1958
	A2	Sequence	# PSMs	# Proteins	# Protein Groups	Protein Group Accessions	Modifications	ΔCn	Area	XCorr	Charge	MH+ [Da]	ΔM [ppm]	RT [min]	# Missed Cleavages
	High	AGYAAGVAcDSGTNNAEcK	5	34	34	unk	C9(Carbamidomethyl); C18(Carbamidomethyl)	0	8.60235e+07	5.04603	2	1915.79	2.07756	23.8629	0
	High	VNcDLKTcQDGSSTAHQVIK	1	34	34	unk	C3(Carbamidomethyl); C8(Carbamidomethyl)	0	6.04997e+07	4.54402	4	2261.07	2.2059	24.0198	1
	High	VYRDIVNAVSTK	5	34	34	unk		0	3.75593e+08	3.86734	3	1364.75	0.0954777	29.2338	1
	High	cTIEPAYTSGDAFTK	2	34	34	unk	C1(Carbamidomethyl)	0	3.19044e+08	3.2861	2	1660.75	0.803495	32.6109	0
	High	TcQDGSSTAHQVIK	1	34	34	unk	C2(Carbamidomethyl)	0	0	2.7462	3	1531.72	1.23417	19.7492	0
unk	len=309 - [Mii66946_c0_g2_i1_5]	6.17946	19.61	1	0	2	2	5.94657e+07	102	10.7264	4.61475
	A2	Sequence	# PSMs	# Proteins	# Protein Groups	Protein Group Accessions	Modifications	ΔCn	Area	XCorr	Charge	MH+ [Da]	ΔM [ppm]	RT [min]	# Missed Cleavages
	High	TDLIPKDNVDISFPNNPER	1	2	2	unk		0	4.63901e+07	3.19827	3	2184.1	2.73567	37.5564	1
	High	TDLIPKDNVDISFPNNPERK	1	2	2	unk		0	72541256	2.98119	3	2312.19	2.24126	35.6256	2
unk	len=229 - [Mii66946_c0_g2_i2_5]	6.17946	26.32	1	0	2	2	5.94657e+07	76	8.40621	4.61475
	A2	Sequence	# PSMs	# Proteins	# Protein Groups	Protein Group Accessions	Modifications	ΔCn	Area	XCorr	Charge	MH+ [Da]	ΔM [ppm]	RT [min]	# Missed Cleavages
	High	TDLIPKDNVDISFPNNPER	1	2	2	unk		0	4.63901e+07	3.19827	3	2184.1	2.73567	37.5564	1
	High	TDLIPKDNVDISFPNNPERK	1	2	2	unk		0	72541256	2.98119	3	2312.19	2.24126	35.6256	2
unk	len=895 - [Mii71593_c2_g1_i1_5]	3.00548	15.77	1	1	1	1		298	32.1772	8.1626
	A2	Sequence	# PSMs	# Proteins	# Protein Groups	Protein Group Accessions	Modifications	ΔCn	Area	XCorr	Charge	MH+ [Da]	ΔM [ppm]	RT [min]	# Missed Cleavages
	High	ASRCTITELSSGSVLASFILEMGSNSGSPPSNDNLASTINQYcKNNR	1	1	1	unk	C43(Carbamidomethyl)	0	0	3.00548	5	4991.37	3.1664	43.8848	2
unk	len=581 - [Mii23973_c0_g1_i1_4]	2.82976	5.7	1	0	1	1	5.53201e+07	193	21.1593	5.36377
	A2	Sequence	# PSMs	# Proteins	# Protein Groups	Protein Group Accessions	Modifications	ΔCn	Area	XCorr	Charge	MH+ [Da]	ΔM [ppm]	RT [min]	# Missed Cleavages
	High	AVFPSIVGRPR	1	19	19	unk		0	5.53201e+07	2.82976	3	1198.71	1.85744	33.1132	0
unk	len=655 - [Mii24311_c0_g1_i1_5]	2.82976	5.05	1	0	1	1	5.53201e+07	218	24.3992	5.43994
	A2	Sequence	# PSMs	# Proteins	# Protein Groups	Protein Group Accessions	Modifications	ΔCn	Area	XCorr	Charge	MH+ [Da]	ΔM [ppm]	RT [min]	# Missed Cleavages
	High	AVFPSIVGRPR	1	19	19	unk		0	5.53201e+07	2.82976	3	1198.71	1.85744	33.1132	0
unk	len=227 - [Mii27308_c0_g1_i1_4]	2.82976	14.67	1	0	1	1	5.53201e+07	75	8.38012	7.51807
	A2	Sequence	# PSMs	# Proteins	# Protein Groups	Protein Group Accessions	Modifications	ΔCn	Area	XCorr	Charge	MH+ [Da]	ΔM [ppm]	RT [min]	# Missed Cleavages
	High	AVFPSIVGRPR	1	19	19	unk		0	5.53201e+07	2.82976	3	1198.71	1.85744	33.1132	0
unk	len=335 - [Mii27308_c0_g2_i1_4]	2.82976	9.91	1	0	1	1	5.53201e+07	111	11.9909	6.52197
	A2	Sequence	# PSMs	# Proteins	# Protein Groups	Protein Group Accessions	Modifications	ΔCn	Area	XCorr	Charge	MH+ [Da]	ΔM [ppm]	RT [min]	# Missed Cleavages
	High	AVFPSIVGRPR	1	19	19	unk		0	5.53201e+07	2.82976	3	1198.71	1.85744	33.1132	0
unk	len=1345 - [Mii41466_c0_g1_i1_1]	2.82976	2.46	1	0	1	1	5.53201e+07	448	50.1079	5.8208
	A2	Sequence	# PSMs	# Proteins	# Protein Groups	Protein Group Accessions	Modifications	ΔCn	Area	XCorr	Charge	MH+ [Da]	ΔM [ppm]	RT [min]	# Missed Cleavages
	High	AVFPSIVGRPR	1	19	19	unk		0	5.53201e+07	2.82976	3	1198.71	1.85744	33.1132	0
unk	len=348 - [Mii46547_c0_g1_i1_3]	2.82976	9.57	1	0	1	1	5.53201e+07	115	12.483	6.52197
	A2	Sequence	# PSMs	# Proteins	# Protein Groups	Protein Group Accessions	Modifications	ΔCn	Area	XCorr	Charge	MH+ [Da]	ΔM [ppm]	RT [min]	# Missed Cleavages
	High	AVFPSIVGRPR	1	19	19	unk		0	5.53201e+07	2.82976	3	1198.71	1.85744	33.1132	0
unk	len=341 - [Mii46547_c0_g1_i2_3]	2.82976	9.73	1	0	1	1	5.53201e+07	113	12.314	8.03076
	A2	Sequence	# PSMs	# Proteins	# Protein Groups	Protein Group Accessions	Modifications	ΔCn	Area	XCorr	Charge	MH+ [Da]	ΔM [ppm]	RT [min]	# Missed Cleavages
	High	AVFPSIVGRPR	1	19	19	unk		0	5.53201e+07	2.82976	3	1198.71	1.85744	33.1132	0
unk	len=1306 - [Mii48937_c0_g1_i1_6]	2.82976	2.53	1	0	1	1	5.53201e+07	434	48.6471	6.3667
	A2	Sequence	# PSMs	# Proteins	# Protein Groups	Protein Group Accessions	Modifications	ΔCn	Area	XCorr	Charge	MH+ [Da]	ΔM [ppm]	RT [min]	# Missed Cleavages
	High	AVFPSIVGRPR	1	19	19	unk		0	5.53201e+07	2.82976	3	1198.71	1.85744	33.1132	0
unk	len=384 - [Mii50925_c0_g1_i1_2]	2.82976	8.66	1	0	1	1	5.53201e+07	127	14.126	6.16357
	A2	Sequence	# PSMs	# Proteins	# Protein Groups	Protein Group Accessions	Modifications	ΔCn	Area	XCorr	Charge	MH+ [Da]	ΔM [ppm]	RT [min]	# Missed Cleavages
	High	AVFPSIVGRPR	1	19	19	unk		0	5.53201e+07	2.82976	3	1198.71	1.85744	33.1132	0
unk	len=396 - [Mii50925_c0_g1_i2_2]	2.82976	8.4	1	0	1	1	5.53201e+07	131	14.5723	6.16357
	A2	Sequence	# PSMs	# Proteins	# Protein Groups	Protein Group Accessions	Modifications	ΔCn	Area	XCorr	Charge	MH+ [Da]	ΔM [ppm]	RT [min]	# Missed Cleavages
	High	AVFPSIVGRPR	1	19	19	unk		0	5.53201e+07	2.82976	3	1198.71	1.85744	33.1132	0
unk	len=1531 - [Mii55690_c0_g1_i1_4]	2.82976	2.16	1	0	1	1	5.53201e+07	510	57.7905	7.26904
	A2	Sequence	# PSMs	# Proteins	# Protein Groups	Protein Group Accessions	Modifications	ΔCn	Area	XCorr	Charge	MH+ [Da]	ΔM [ppm]	RT [min]	# Missed Cleavages
	High	AVFPSIVGRPR	1	19	19	unk		0	5.53201e+07	2.82976	3	1198.71	1.85744	33.1132	0
unk	len=1457 - [Mii55690_c0_g2_i1_5]	2.82976	2.27	1	0	1	1	5.53201e+07	485	54.6403	6.60986
	A2	Sequence	# PSMs	# Proteins	# Protein Groups	Protein Group Accessions	Modifications	ΔCn	Area	XCorr	Charge	MH+ [Da]	ΔM [ppm]	RT [min]	# Missed Cleavages
	High	AVFPSIVGRPR	1	19	19	unk		0	5.53201e+07	2.82976	3	1198.71	1.85744	33.1132	0
unk	len=1101 - [Mii55980_c0_g1_i1_6]	2.82976	3	1	0	1	1	5.53201e+07	367	41.2104	5.46533
	A2	Sequence	# PSMs	# Proteins	# Protein Groups	Protein Group Accessions	Modifications	ΔCn	Area	XCorr	Charge	MH+ [Da]	ΔM [ppm]	RT [min]	# Missed Cleavages
	High	AVFPSIVGRPR	1	19	19	unk		0	5.53201e+07	2.82976	3	1198.71	1.85744	33.1132	0
unk	len=541 - [Mii58597_c0_g1_i1_1]	2.82976	6.11	1	0	1	1	5.53201e+07	180	19.8697	5.5415
	A2	Sequence	# PSMs	# Proteins	# Protein Groups	Protein Group Accessions	Modifications	ΔCn	Area	XCorr	Charge	MH+ [Da]	ΔM [ppm]	RT [min]	# Missed Cleavages
	High	AVFPSIVGRPR	1	19	19	unk		0	5.53201e+07	2.82976	3	1198.71	1.85744	33.1132	0
unk	len=946 - [Mii64514_c0_g1_i1_1]	2.82976	3.49	1	0	1	1	5.53201e+07	315	35.2403	5.18604
	A2	Sequence	# PSMs	# Proteins	# Protein Groups	Protein Group Accessions	Modifications	ΔCn	Area	XCorr	Charge	MH+ [Da]	ΔM [ppm]	RT [min]	# Missed Cleavages
	High	AVFPSIVGRPR	1	19	19	unk		0	5.53201e+07	2.82976	3	1198.71	1.85744	33.1132	0
unk	len=439 - [Mii64514_c0_g1_i2_1]	2.82976	7.53	1	0	1	1	5.53201e+07	146	16.3921	6.68311
	A2	Sequence	# PSMs	# Proteins	# Protein Groups	Protein Group Accessions	Modifications	ΔCn	Area	XCorr	Charge	MH+ [Da]	ΔM [ppm]	RT [min]	# Missed Cleavages
	High	AVFPSIVGRPR	1	19	19	unk		0	5.53201e+07	2.82976	3	1198.71	1.85744	33.1132	0
unk	len=235 - [Mii68875_c0_g1_i1_6]	2.82976	14.1	1	0	1	1	5.53201e+07	78	9.05261	7.04932
	A2	Sequence	# PSMs	# Proteins	# Protein Groups	Protein Group Accessions	Modifications	ΔCn	Area	XCorr	Charge	MH+ [Da]	ΔM [ppm]	RT [min]	# Missed Cleavages
	High	AVFPSIVGRPR	1	19	19	unk		0	5.53201e+07	2.82976	3	1198.71	1.85744	33.1132	0
unk	len=406 - [Mii102888_c0_g1_i1_4]	2.82976	8.15	1	0	1	1	5.53201e+07	135	14.7434	5.98584
	A2	Sequence	# PSMs	# Proteins	# Protein Groups	Protein Group Accessions	Modifications	ΔCn	Area	XCorr	Charge	MH+ [Da]	ΔM [ppm]	RT [min]	# Missed Cleavages
	High	AVFPSIVGRPR	1	19	19	unk		0	5.53201e+07	2.82976	3	1198.71	1.85744	33.1132	0
unk	len=403 - [Mii103221_c0_g1_i1_5]	2.82976	8.21	1	0	1	1	5.53201e+07	134	14.8322	7.37158
	A2	Sequence	# PSMs	# Proteins	# Protein Groups	Protein Group Accessions	Modifications	ΔCn	Area	XCorr	Charge	MH+ [Da]	ΔM [ppm]	RT [min]	# Missed Cleavages
	High	AVFPSIVGRPR	1	19	19	unk		0	5.53201e+07	2.82976	3	1198.71	1.85744	33.1132	0
unk	len=359 - [Mii15957_c0_g1_i1_6]	2.78819	11.86	1	0	1	1	7.20795e+07	118	13.2969	5.79541
	A2	Sequence	# PSMs	# Proteins	# Protein Groups	Protein Group Accessions	Modifications	ΔCn	Area	XCorr	Charge	MH+ [Da]	ΔM [ppm]	RT [min]	# Missed Cleavages
	High	NLDIERPTYTNLNR	1	31	31	unk		0	7.20795e+07	2.78819	3	1718.88	1.68806	31.7704	0
unk	len=426 - [Mii24072_c0_g1_i1_6]	2.78819	9.93	1	0	1	1	7.20795e+07	141	15.9248	5.78271
	A2	Sequence	# PSMs	# Proteins	# Protein Groups	Protein Group Accessions	Modifications	ΔCn	Area	XCorr	Charge	MH+ [Da]	ΔM [ppm]	RT [min]	# Missed Cleavages
	High	NLDIERPTYTNLNR	1	31	31	unk		0	7.20795e+07	2.78819	3	1718.88	1.68806	31.7704	0
unk	len=922 - [Mii40167_c0_g1_i1_5]	2.78819	4.56	1	0	1	1	7.20795e+07	307	34.0829	5.47803
	A2	Sequence	# PSMs	# Proteins	# Protein Groups	Protein Group Accessions	Modifications	ΔCn	Area	XCorr	Charge	MH+ [Da]	ΔM [ppm]	RT [min]	# Missed Cleavages
	High	NLDIERPTYTNLNR	1	31	31	unk		0	7.20795e+07	2.78819	3	1718.88	1.68806	31.7704	0
unk	len=384 - [Mii46234_c0_g1_i1_4]	2.78819	10.94	1	0	1	1	7.20795e+07	128	15.1747	9.77393
	A2	Sequence	# PSMs	# Proteins	# Protein Groups	Protein Group Accessions	Modifications	ΔCn	Area	XCorr	Charge	MH+ [Da]	ΔM [ppm]	RT [min]	# Missed Cleavages
	High	NLDIERPTYTNLNR	1	31	31	unk		0	7.20795e+07	2.78819	3	1718.88	1.68806	31.7704	0
unk	len=366 - [Mii46632_c0_g1_i1_2]	2.78819	11.57	1	0	1	1	7.20795e+07	121	13.4197	6.27783
	A2	Sequence	# PSMs	# Proteins	# Protein Groups	Protein Group Accessions	Modifications	ΔCn	Area	XCorr	Charge	MH+ [Da]	ΔM [ppm]	RT [min]	# Missed Cleavages
	High	NLDIERPTYTNLNR	1	31	31	unk		0	7.20795e+07	2.78819	3	1718.88	1.68806	31.7704	0
unk	len=814 - [Mii46632_c0_g1_i2_3]	2.78819	5.19	1	0	1	1	7.20795e+07	270	29.7619	5.43994
	A2	Sequence	# PSMs	# Proteins	# Protein Groups	Protein Group Accessions	Modifications	ΔCn	Area	XCorr	Charge	MH+ [Da]	ΔM [ppm]	RT [min]	# Missed Cleavages
	High	NLDIERPTYTNLNR	1	31	31	unk		0	7.20795e+07	2.78819	3	1718.88	1.68806	31.7704	0
unk	len=680 - [Mii56121_c0_g1_i1_6]	2.78819	6.19	1	0	1	1	7.20795e+07	226	26.2769	9.62744
	A2	Sequence	# PSMs	# Proteins	# Protein Groups	Protein Group Accessions	Modifications	ΔCn	Area	XCorr	Charge	MH+ [Da]	ΔM [ppm]	RT [min]	# Missed Cleavages
	High	NLDIERPTYTNINR	1	31	31	unk		0	7.20795e+07	2.78819	3	1718.88	1.68806	31.7704	0
unk	len=786 - [Mii57421_c0_g1_i1_2]	2.78819	5.34	1	0	1	1	7.20795e+07	262	29.2168	6.41748
	A2	Sequence	# PSMs	# Proteins	# Protein Groups	Protein Group Accessions	Modifications	ΔCn	Area	XCorr	Charge	MH+ [Da]	ΔM [ppm]	RT [min]	# Missed Cleavages
	High	NLDIERPTYTNINR	1	31	31	unk		0	7.20795e+07	2.78819	3	1718.88	1.68806	31.7704	0
unk	len=894 - [Mii57421_c0_g1_i2_2]	2.78819	4.7	1	0	1	1	7.20795e+07	298	33.3729	6.97607
	A2	Sequence	# PSMs	# Proteins	# Protein Groups	Protein Group Accessions	Modifications	ΔCn	Area	XCorr	Charge	MH+ [Da]	ΔM [ppm]	RT [min]	# Missed Cleavages
	High	NLDIERPTYTNINR	1	31	31	unk		0	7.20795e+07	2.78819	3	1718.88	1.68806	31.7704	0
unk	len=1148 - [Mii57421_c0_g1_i3_1]	2.78819	3.66	1	0	1	1	7.20795e+07	383	42.7075	6.82959
	A2	Sequence	# PSMs	# Proteins	# Protein Groups	Protein Group Accessions	Modifications	ΔCn	Area	XCorr	Charge	MH+ [Da]	ΔM [ppm]	RT [min]	# Missed Cleavages
	High	NLDIERPTYTNINR	1	31	31	unk		0	7.20795e+07	2.78819	3	1718.88	1.68806	31.7704	0
unk	len=1554 - [Mii60785_c0_g1_i2_4]	2.78819	2.7	1	0	1	1	7.20795e+07	518	57.8397	6.0874
	A2	Sequence	# PSMs	# Proteins	# Protein Groups	Protein Group Accessions	Modifications	ΔCn	Area	XCorr	Charge	MH+ [Da]	ΔM [ppm]	RT [min]	# Missed Cleavages
	High	NLDIERPTYTNLNR	1	31	31	unk		0	7.20795e+07	2.78819	3	1718.88	1.68806	31.7704	0
unk	len=1387 - [Mii61472_c0_g1_i1_5]	2.78819	3.03	1	0	1	1	7.20795e+07	462	51.7669	6.75635
	A2	Sequence	# PSMs	# Proteins	# Protein Groups	Protein Group Accessions	Modifications	ΔCn	Area	XCorr	Charge	MH+ [Da]	ΔM [ppm]	RT [min]	# Missed Cleavages
	High	NLDIERPTYTNINR	1	31	31	unk		0	7.20795e+07	2.78819	3	1718.88	1.68806	31.7704	0
unk	len=1953 - [Mii65146_c0_g1_i1_6]	2.78819	2.15	1	0	1	1	7.20795e+07	651	73.7673	5.46533
	A2	Sequence	# PSMs	# Proteins	# Protein Groups	Protein Group Accessions	Modifications	ΔCn	Area	XCorr	Charge	MH+ [Da]	ΔM [ppm]	RT [min]	# Missed Cleavages
	High	NLDIERPTYTNLNR	1	31	31	unk		0	7.20795e+07	2.78819	3	1718.88	1.68806	31.7704	0
unk	len=822 - [Mii65987_c0_g1_i1_3]	2.78819	5.13	1	0	1	1	7.20795e+07	273	30.7553	6.15088
	A2	Sequence	# PSMs	# Proteins	# Protein Groups	Protein Group Accessions	Modifications	ΔCn	Area	XCorr	Charge	MH+ [Da]	ΔM [ppm]	RT [min]	# Missed Cleavages
	High	NLDIERPTYTNLNR	1	31	31	unk		0	7.20795e+07	2.78819	3	1718.88	1.68806	31.7704	0
unk	len=377 - [Mii65987_c0_g1_i2_3]	2.78819	11.2	1	0	1	1	7.20795e+07	125	14.2261	5.42725
	A2	Sequence	# PSMs	# Proteins	# Protein Groups	Protein Group Accessions	Modifications	ΔCn	Area	XCorr	Charge	MH+ [Da]	ΔM [ppm]	RT [min]	# Missed Cleavages
	High	NLDIERPTYTNLNR	1	31	31	unk		0	7.20795e+07	2.78819	3	1718.88	1.68806	31.7704	0
unk	len=1300 - [Mii65987_c1_g1_i1_4]	2.78819	3.23	1	0	1	1	7.20795e+07	433	48.2038	5.40186
	A2	Sequence	# PSMs	# Proteins	# Protein Groups	Protein Group Accessions	Modifications	ΔCn	Area	XCorr	Charge	MH+ [Da]	ΔM [ppm]	RT [min]	# Missed Cleavages
	High	NLDIERPTYTNLNR	1	31	31	unk		0	7.20795e+07	2.78819	3	1718.88	1.68806	31.7704	0
unk	len=1362 - [Mii65987_c1_g1_i2_4]	2.78819	3.08	1	0	1	1	7.20795e+07	454	51.5544	7.57666
	A2	Sequence	# PSMs	# Proteins	# Protein Groups	Protein Group Accessions	Modifications	ΔCn	Area	XCorr	Charge	MH+ [Da]	ΔM [ppm]	RT [min]	# Missed Cleavages
	High	NLDIERPTYTNLNR	1	31	31	unk		0	7.20795e+07	2.78819	3	1718.88	1.68806	31.7704	0
unk	len=1711 - [Mii68344_c0_g2_i1_5]	2.78819	2.46	1	0	1	1	7.20795e+07	570	63.9528	5.90967
	A2	Sequence	# PSMs	# Proteins	# Protein Groups	Protein Group Accessions	Modifications	ΔCn	Area	XCorr	Charge	MH+ [Da]	ΔM [ppm]	RT [min]	# Missed Cleavages
	High	NLDIERPTYTNLNR	1	31	31	unk		0	7.20795e+07	2.78819	3	1718.88	1.68806	31.7704	0
unk	len=723 - [Mii68344_c0_g2_i2_6]	2.78819	5.81	1	0	1	1	7.20795e+07	241	27.2585	5.38916
	A2	Sequence	# PSMs	# Proteins	# Protein Groups	Protein Group Accessions	Modifications	ΔCn	Area	XCorr	Charge	MH+ [Da]	ΔM [ppm]	RT [min]	# Missed Cleavages
	High	NLDIERPTYTNLNR	1	31	31	unk		0	7.20795e+07	2.78819	3	1718.88	1.68806	31.7704	0
unk	len=1812 - [Mii68344_c0_g2_i3_4]	2.78819	2.32	1	0	1	1	7.20795e+07	604	67.7432	5.35107
	A2	Sequence	# PSMs	# Proteins	# Protein Groups	Protein Group Accessions	Modifications	ΔCn	Area	XCorr	Charge	MH+ [Da]	ΔM [ppm]	RT [min]	# Missed Cleavages
	High	NLDIERPTYTNLNR	1	31	31	unk		0	7.20795e+07	2.78819	3	1718.88	1.68806	31.7704	0
unk	len=1867 - [Mii70140_c0_g1_i1_5]	2.78819	2.25	1	0	1	1	7.20795e+07	622	70.1276	5.41455
	A2	Sequence	# PSMs	# Proteins	# Protein Groups	Protein Group Accessions	Modifications	ΔCn	Area	XCorr	Charge	MH+ [Da]	ΔM [ppm]	RT [min]	# Missed Cleavages
	High	NLDIERPTYTNLNR	1	31	31	unk		0	7.20795e+07	2.78819	3	1718.88	1.68806	31.7704	0
unk	len=1018 - [Mii70512_c1_g1_i1_3]	2.78819	4.14	1	0	1	1	7.20795e+07	338	37.6759	6.52197
	A2	Sequence	# PSMs	# Proteins	# Protein Groups	Protein Group Accessions	Modifications	ΔCn	Area	XCorr	Charge	MH+ [Da]	ΔM [ppm]	RT [min]	# Missed Cleavages
	High	NLDIERPTYTNLNR	1	31	31	unk		0	7.20795e+07	2.78819	3	1718.88	1.68806	31.7704	0
unk	len=1009 - [Mii70512_c1_g2_i1_3]	2.78819	4.17	1	0	1	1	7.20795e+07	336	37.4808	5.92236
	A2	Sequence	# PSMs	# Proteins	# Protein Groups	Protein Group Accessions	Modifications	ΔCn	Area	XCorr	Charge	MH+ [Da]	ΔM [ppm]	RT [min]	# Missed Cleavages
	High	NLDIERPTYTNLNR	1	31	31	unk		0	7.20795e+07	2.78819	3	1718.88	1.68806	31.7704	0
unk	len=1764 - [Mii70627_c0_g1_i1_1]	2.78819	2.38	1	0	1	1	7.20795e+07	588	66.3606	5.2876
	A2	Sequence	# PSMs	# Proteins	# Protein Groups	Protein Group Accessions	Modifications	ΔCn	Area	XCorr	Charge	MH+ [Da]	ΔM [ppm]	RT [min]	# Missed Cleavages
	High	NLDIERPTYTNLNR	1	31	31	unk		0	7.20795e+07	2.78819	3	1718.88	1.68806	31.7704	0
unk	len=1715 - [Mii70920_c2_g1_i1_3]	2.78819	2.45	1	0	1	1	7.20795e+07	571	64.2543	5.2876
	A2	Sequence	# PSMs	# Proteins	# Protein Groups	Protein Group Accessions	Modifications	ΔCn	Area	XCorr	Charge	MH+ [Da]	ΔM [ppm]	RT [min]	# Missed Cleavages
	High	NLDIERPTYTNLNR	1	31	31	unk		0	7.20795e+07	2.78819	3	1718.88	1.68806	31.7704	0
unk	len=1125 - [Mii72254_c0_g1_i1_4]	2.78819	3.73	1	0	1	1	7.20795e+07	375	41.7443	5.96045
	A2	Sequence	# PSMs	# Proteins	# Protein Groups	Protein Group Accessions	Modifications	ΔCn	Area	XCorr	Charge	MH+ [Da]	ΔM [ppm]	RT [min]	# Missed Cleavages
	High	NLDIERPTYTNLNR	1	31	31	unk		0	7.20795e+07	2.78819	3	1718.88	1.68806	31.7704	0
unk	len=1222 - [Mii72538_c1_g2_i1_1]	2.78819	3.44	1	0	1	1	7.20795e+07	407	46.0158	6.1001
	A2	Sequence	# PSMs	# Proteins	# Protein Groups	Protein Group Accessions	Modifications	ΔCn	Area	XCorr	Charge	MH+ [Da]	ΔM [ppm]	RT [min]	# Missed Cleavages
	High	NLDIERPTYTNLNR	1	31	31	unk		0	7.20795e+07	2.78819	3	1718.88	1.68806	31.7704	0
unk	len=1442 - [Mii72538_c2_g2_i1_2]	2.78819	2.92	1	0	1	1	7.20795e+07	480	53.2771	5.26221
	A2	Sequence	# PSMs	# Proteins	# Protein Groups	Protein Group Accessions	Modifications	ΔCn	Area	XCorr	Charge	MH+ [Da]	ΔM [ppm]	RT [min]	# Missed Cleavages
	High	NLDIERPTYTNLNR	1	31	31	unk		0	7.20795e+07	2.78819	3	1718.88	1.68806	31.7704	0
unk	len=1542 - [Mii72538_c2_g2_i2_2]	2.78819	2.73	1	0	1	1	7.20795e+07	513	57.4653	5.35107
	A2	Sequence	# PSMs	# Proteins	# Protein Groups	Protein Group Accessions	Modifications	ΔCn	Area	XCorr	Charge	MH+ [Da]	ΔM [ppm]	RT [min]	# Missed Cleavages
	High	NLDIERPTYTNLNR	1	31	31	unk		0	7.20795e+07	2.78819	3	1718.88	1.68806	31.7704	0
unk	len=1550 - [Mii72538_c2_g2_i4_1]	2.78819	2.71	1	0	1	1	7.20795e+07	516	57.7604	5.33838
	A2	Sequence	# PSMs	# Proteins	# Protein Groups	Protein Group Accessions	Modifications	ΔCn	Area	XCorr	Charge	MH+ [Da]	ΔM [ppm]	RT [min]	# Missed Cleavages
	High	NLDIERPTYTNLNR	1	31	31	unk		0	7.20795e+07	2.78819	3	1718.88	1.68806	31.7704	0
unk	len=1271 - [Mii72538_c2_g3_i1_1]	2.78819	3.3	1	0	1	1	7.20795e+07	424	47.2576	6.16357
	A2	Sequence	# PSMs	# Proteins	# Protein Groups	Protein Group Accessions	Modifications	ΔCn	Area	XCorr	Charge	MH+ [Da]	ΔM [ppm]	RT [min]	# Missed Cleavages
	High	NLDIERPTYTNLNR	1	31	31	unk		0	7.20795e+07	2.78819	3	1718.88	1.68806	31.7704	0
unk	len=763 - [Mii64875_c0_g2_i1_5]	2.76458	7.87	1	0	1	1	3.65102e+09	254	29.6472	8.26514
	A2	Sequence	# PSMs	# Proteins	# Protein Groups	Protein Group Accessions	Modifications	ΔCn	Area	XCorr	Charge	MH+ [Da]	ΔM [ppm]	RT [min]	# Missed Cleavages
	High	SLNcIAMmLFKTIHSRCMHR	1	2	2	unk	C4(Carbamidomethyl); M8(Oxidation)	0	3.65102e+09	2.76458	4	2465.19	0.226203	37.0703	2
unk	len=774 - [Mii64875_c0_g2_i2_5]	2.76458	7.78	1	0	1	1	3.65102e+09	257	30.1336	9.48096
	A2	Sequence	# PSMs	# Proteins	# Protein Groups	Protein Group Accessions	Modifications	ΔCn	Area	XCorr	Charge	MH+ [Da]	ΔM [ppm]	RT [min]	# Missed Cleavages
	High	SLNcIAMmLFKTIHSRCMHR	1	2	2	unk	C4(Carbamidomethyl); M8(Oxidation)	0	3.65102e+09	2.76458	4	2465.19	0.226203	37.0703	2
unk	len=2379 - [Mii71524_c0_g1_i1_1]	2.42139	1.39	1	1	1	1	23253026	793	89.5334	9.70068
	A2	Sequence	# PSMs	# Proteins	# Protein Groups	Protein Group Accessions	Modifications	ΔCn	Area	XCorr	Charge	MH+ [Da]	ΔM [ppm]	RT [min]	# Missed Cleavages
	High	NKSIEIDTNIR	1	1	1	unk		0	23253026	2.42139	2	1302.7	1.46718	27.4005	1

## Sheet: footprints of amp tails 1
Protein FDR Confidence	Accession	Description	FASTA Title Lines	Exp. q-value	Sum PEP Score	Coverage	# Peptides	# PSMs	# Unique Peptides	# Protein Groups	# AAs	MW [kDa]	calc. pI	Area: F2: Sample	emPAI	Score Sequest HT	# Peptides Sequest HT
High	unk	len=2663	>gnl|unk|Mii74473_c0_g1_i1_6 len=2663	0,000	20,007	21	12	20	12	1	887	100,4	7,20	8.44553e+07	0,719	44,08	12
	Confidence	Sequence	Modifications	Qvality PEP	Qvality q-value	# Protein Groups	# Proteins	# PSMs	Master Protein Accessions	# Missed Cleavages	Theo. MH+ [Da]	Area: F2: Sample	XCorr Sequest HT	Confidence Sequest HT	Percolator q-Value Sequest HT	Percolator PEP Sequest HT
	High	YDQAKEYCEGMGMSLAK	1xCarbamidomethyl [C8]	0,000181204	0	1	5	1	unk	1	1980,85000	3.76668e+07	3,06	High	0	0,004013
	High	VYNNLHNTWLSK		0,0132684	0	1	8	1	unk	0	1488,75939	1.92414e+07	1,66	High	0	0,06217
	High	WTYTDNSPASFTK		0,000665749	0	1	8	3	unk	0	1517,69070	56580886	2,72	High	0	0,009189
	High	LKTFDEASDYCAGLGMK	1xCarbamidomethyl [C11]	0,218429	0	1	8	1	unk	1	1905,87211	2.02725e+07	1,42	High	0	0,3374
	High	TFDEASDYCAGLGMK	1xCarbamidomethyl [C9]	0,000237851	0	1	8	2	unk	0	1664,69308	3.17427e+07	2,84	High	0	0,01742
	High	SADCNYKLTSGSVVLNDLPTGDKCGR	2xCarbamidomethyl [C4; C24]	0,0342533	0	1	9	1	unk	2	2827,33492	2.07086e+07	1,39	High	0	0,1133
	High	WNPGQPDNAGRNEHCAILNWGTR	1xCarbamidomethyl [C15]	3,95584E-05	0	1	1	3	unk	1	2663,22802	6.24811e+07	3,27	High	0	0,001512
	High	GTFICESDHPECNYELQANAPLTHEVETGDQCGR	3xCarbamidomethyl [C5; C12; C32]	3,79603E-07	0	1	8	2	unk	0	3934,67014	1.34304e+08	4,83	High	0	7,798E-05
	High	GGWWYFGASDRGHEAK		0,128654	0	1	8	1	unk	1	1823,82484	18304212	2,02	High	0	0,2511
	High	WNPGQPDNAGHR		0,00565513	0	1	3	3	unk	0	1348,61412	1.31899e+07	3,10	High	0	0,03653
	High	YWIGANDRGQEGK		0,0456273	0	1	8	1	unk	1	1493,71317	47953787	2,23	High	0	0,1355
	High	FGNKGYLFSKK		0,0616785	0	1	8	1	unk	2	1288,70483	1.33255e+07	2,54	High	0	0,1631
High	unk	len=1345	>gnl|unk|Mii41466_c0_g1_i1_1 len=1345	0,000	16,290	20	8	20	8	1	448	50,1	5,82	1.88968e+08	1,096	46,22	8
	Confidence	Sequence	Modifications	Qvality PEP	Qvality q-value	# Protein Groups	# Proteins	# PSMs	Master Protein Accessions	# Missed Cleavages	Theo. MH+ [Da]	Area: F2: Sample	XCorr Sequest HT	Confidence Sequest HT	Percolator q-Value Sequest HT	Percolator PEP Sequest HT
	High	AVFPSIVGRPR		0,00180944	0	1	19	4	unk	0	1198,70550	2.58513e+08	2,73	High	0	0,03185
	High	VAPEEHPVLLTEAPLNPK		6,02362E-06	0	1	11	5	unk	0	1954,06440	213099959	3,91	High	0	0,001196
	High	SYELPDGQVITIGNER		0,0302289	0	1	31	1	unk	0	1790,89192	7.23827e+07	1,10	High	0	0,1047
	High	DSYVGDEAQSKR		0,026482	0	1	18	1	unk	1	1354,62335	1.37285e+06	1,40	High	0	0,09629
	High	AGFAGDDAPR		0,0145991	0	1	21	2	unk	0	976,44828	2.13089e+07	2,12	High	0	0,06612
	High	HQGVMVGMGQK		0,0376886	0	1	26	2	unk	0	1171,57106	2.98557e+07	2,74	High	0	0,1206
	High	HQGVMVGMGQKDSYVGDEAQSKR		2,14243E-08	0	1	18	2	unk	2	2507,17657	6.46375e+07	4,74	High	0	0,0003403
	High	MQKEISALAPSTMK		0,0167877	0	1	7	3	unk	1	1534,79676	9.52914e+07	2,25	High	0	0,09009
High	unk	len=1457	>gnl|unk|Mii55690_c0_g2_i1_5 len=1457	0,000	16,290	18	8	20	8	1	485	54,6	6,61	1.88968e+08	0,951	46,22	8
	Confidence	Sequence	Modifications	Qvality PEP	Qvality q-value	# Protein Groups	# Proteins	# PSMs	Master Protein Accessions	# Missed Cleavages	Theo. MH+ [Da]	Area: F2: Sample	XCorr Sequest HT	Confidence Sequest HT	Percolator q-Value Sequest HT	Percolator PEP Sequest HT
	High	AVFPSIVGRPR		0,00180944	0	1	19	4	unk	0	1198,70550	2.58513e+08	2,73	High	0	0,03185
	High	VAPEEHPVLLTEAPLNPK		6,02362E-06	0	1	11	5	unk	0	1954,06440	213099959	3,91	High	0	0,001196
	High	SYELPDGQVITIGNER		0,0302289	0	1	31	1	unk	0	1790,89192	7.23827e+07	1,10	High	0	0,1047
	High	DSYVGDEAQSKR		0,026482	0	1	18	1	unk	1	1354,62335	1.37285e+06	1,40	High	0	0,09629
	High	AGFAGDDAPR		0,0145991	0	1	21	2	unk	0	976,44828	2.13089e+07	2,12	High	0	0,06612
	High	HQGVMVGMGQK		0,0376886	0	1	26	2	unk	0	1171,57106	2.98557e+07	2,74	High	0	0,1206
	High	HQGVMVGMGQKDSYVGDEAQSKR		2,14243E-08	0	1	18	2	unk	2	2507,17657	6.46375e+07	4,74	High	0	0,0003403
	High	MQKEISALAPSTMK		0,0167877	0	1	7	3	unk	1	1534,79676	9.52914e+07	2,25	High	0	0,09009
High	unk	len=2197	>gnl|unk|Mii78791_c0_g1_i5_1 len=2197	0,000	15,744	21	10	14	10	1	732	82,7	6,95	7.96129e+07	0,688	29,70	10
	Confidence	Sequence	Modifications	Qvality PEP	Qvality q-value	# Protein Groups	# Proteins	# PSMs	Master Protein Accessions	# Missed Cleavages	Theo. MH+ [Da]	Area: F2: Sample	XCorr Sequest HT	Confidence Sequest HT	Percolator q-Value Sequest HT	Percolator PEP Sequest HT
	High	YDQAKEYCEGMGMSLAK	1xCarbamidomethyl [C8]	0,000181204	0	1	5	1	unk	1	1980,85000	3.76668e+07	3,06	High	0	0,004013
	High	VYNNLHNTWLSK		0,0132684	0	1	8	1	unk	0	1488,75939	1.92414e+07	1,66	High	0	0,06217
	High	WTYTDNSPASFTK		0,000665749	0	1	8	3	unk	0	1517,69070	56580886	2,72	High	0	0,009189
	High	LKTFDEASDYCAGLGMK	1xCarbamidomethyl [C11]	0,218429	0	1	8	1	unk	1	1905,87211	2.02725e+07	1,42	High	0	0,3374
	High	TFDEASDYCAGLGMK	1xCarbamidomethyl [C9]	0,000237851	0	1	8	2	unk	0	1664,69308	3.17427e+07	2,84	High	0	0,01742
	High	SADCNYKLTSGSVVLNDLPTGDKCGR	2xCarbamidomethyl [C4; C24]	0,0342533	0	1	9	1	unk	2	2827,33492	2.07086e+07	1,39	High	0	0,1133
	High	GTFICESDHPECNYELQANAPLTHEVETGDQCGR	3xCarbamidomethyl [C5; C12; C32]	3,79603E-07	0	1	8	2	unk	0	3934,67014	1.34304e+08	4,83	High	0	7,798E-05
	High	GGWWYFGASDRGHEAK		0,128654	0	1	8	1	unk	1	1823,82484	18304212	2,02	High	0	0,2511
	High	YWIGANDRGQEGK		0,0456273	0	1	8	1	unk	1	1493,71317	47953787	2,23	High	0	0,1355
	High	FGNKGYLFSKK		0,0616785	0	1	8	1	unk	2	1288,70483	1.33255e+07	2,54	High	0	0,1631
High	unk	len=2508	>gnl|unk|Mii78791_c0_g1_i1_1 len=2508	0,000	15,744	19	10	14	10	1	836	94,5	6,77	7.96129e+07	0,6	29,70	10
	Confidence	Sequence	Modifications	Qvality PEP	Qvality q-value	# Protein Groups	# Proteins	# PSMs	Master Protein Accessions	# Missed Cleavages	Theo. MH+ [Da]	Area: F2: Sample	XCorr Sequest HT	Confidence Sequest HT	Percolator q-Value Sequest HT	Percolator PEP Sequest HT
	High	YDQAKEYCEGMGMSLAK	1xCarbamidomethyl [C8]	0,000181204	0	1	5	1	unk	1	1980,85000	3.76668e+07	3,06	High	0	0,004013
	High	VYNNLHNTWLSK		0,0132684	0	1	8	1	unk	0	1488,75939	1.92414e+07	1,66	High	0	0,06217
	High	WTYTDNSPASFTK		0,000665749	0	1	8	3	unk	0	1517,69070	56580886	2,72	High	0	0,009189
	High	LKTFDEASDYCAGLGMK	1xCarbamidomethyl [C11]	0,218429	0	1	8	1	unk	1	1905,87211	2.02725e+07	1,42	High	0	0,3374
	High	TFDEASDYCAGLGMK	1xCarbamidomethyl [C9]	0,000237851	0	1	8	2	unk	0	1664,69308	3.17427e+07	2,84	High	0	0,01742
	High	SADCNYKLTSGSVVLNDLPTGDKCGR	2xCarbamidomethyl [C4; C24]	0,0342533	0	1	9	1	unk	2	2827,33492	2.07086e+07	1,39	High	0	0,1133
	High	GTFICESDHPECNYELQANAPLTHEVETGDQCGR	3xCarbamidomethyl [C5; C12; C32]	3,79603E-07	0	1	8	2	unk	0	3934,67014	1.34304e+08	4,83	High	0	7,798E-05
	High	GGWWYFGASDRGHEAK		0,128654	0	1	8	1	unk	1	1823,82484	18304212	2,02	High	0	0,2511
	High	YWIGANDRGQEGK		0,0456273	0	1	8	1	unk	1	1493,71317	47953787	2,23	High	0	0,1355
	High	FGNKGYLFSKK		0,0616785	0	1	8	1	unk	2	1288,70483	1.33255e+07	2,54	High	0	0,1631
High	unk	len=2593	>gnl|unk|Mii78791_c0_g1_i6_1 len=2593	0,000	15,744	18	10	14	10	1	864	98,2	7,36	7.96129e+07	0,557	29,70	10
	Confidence	Sequence	Modifications	Qvality PEP	Qvality q-value	# Protein Groups	# Proteins	# PSMs	Master Protein Accessions	# Missed Cleavages	Theo. MH+ [Da]	Area: F2: Sample	XCorr Sequest HT	Confidence Sequest HT	Percolator q-Value Sequest HT	Percolator PEP Sequest HT
	High	YDQAKEYCEGMGMSLAK	1xCarbamidomethyl [C8]	0,000181204	0	1	5	1	unk	1	1980,85000	3.76668e+07	3,06	High	0	0,004013
	High	VYNNLHNTWLSK		0,0132684	0	1	8	1	unk	0	1488,75939	1.92414e+07	1,66	High	0	0,06217
	High	WTYTDNSPASFTK		0,000665749	0	1	8	3	unk	0	1517,69070	56580886	2,72	High	0	0,009189
	High	LKTFDEASDYCAGLGMK	1xCarbamidomethyl [C11]	0,218429	0	1	8	1	unk	1	1905,87211	2.02725e+07	1,42	High	0	0,3374
	High	TFDEASDYCAGLGMK	1xCarbamidomethyl [C9]	0,000237851	0	1	8	2	unk	0	1664,69308	3.17427e+07	2,84	High	0	0,01742
	High	SADCNYKLTSGSVVLNDLPTGDKCGR	2xCarbamidomethyl [C4; C24]	0,0342533	0	1	9	1	unk	2	2827,33492	2.07086e+07	1,39	High	0	0,1133
	High	GTFICESDHPECNYELQANAPLTHEVETGDQCGR	3xCarbamidomethyl [C5; C12; C32]	3,79603E-07	0	1	8	2	unk	0	3934,67014	1.34304e+08	4,83	High	0	7,798E-05
	High	GGWWYFGASDRGHEAK		0,128654	0	1	8	1	unk	1	1823,82484	18304212	2,02	High	0	0,2511
	High	YWIGANDRGQEGK		0,0456273	0	1	8	1	unk	1	1493,71317	47953787	2,23	High	0	0,1355
	High	FGNKGYLFSKK		0,0616785	0	1	8	1	unk	2	1288,70483	1.33255e+07	2,54	High	0	0,1631
High	unk	len=1306	>gnl|unk|Mii48937_c0_g1_i1_6 len=1306	0,000	14,103	17	7	17	7	1	434	48,6	6,37	181331975	0,817	43,97	7
	Confidence	Sequence	Modifications	Qvality PEP	Qvality q-value	# Protein Groups	# Proteins	# PSMs	Master Protein Accessions	# Missed Cleavages	Theo. MH+ [Da]	Area: F2: Sample	XCorr Sequest HT	Confidence Sequest HT	Percolator q-Value Sequest HT	Percolator PEP Sequest HT
	High	AVFPSIVGRPR		0,00180944	0	1	19	4	unk	0	1198,70550	2.58513e+08	2,73	High	0	0,03185
	High	VAPEEHPVLLTEAPLNPK		6,02362E-06	0	1	11	5	unk	0	1954,06440	213099959	3,91	High	0	0,001196
	High	SYELPDGQVITIGNER		0,0302289	0	1	31	1	unk	0	1790,89192	7.23827e+07	1,10	High	0	0,1047
	High	DSYVGDEAQSKR		0,026482	0	1	18	1	unk	1	1354,62335	1.37285e+06	1,40	High	0	0,09629
	High	AGFAGDDAPR		0,0145991	0	1	21	2	unk	0	976,44828	2.13089e+07	2,12	High	0	0,06612
	High	HQGVMVGMGQK		0,0376886	0	1	26	2	unk	0	1171,57106	2.98557e+07	2,74	High	0	0,1206
	High	HQGVMVGMGQKDSYVGDEAQSKR		2,14243E-08	0	1	18	2	unk	2	2507,17657	6.46375e+07	4,74	High	0	0,0003403
High	unk	len=1101	>gnl|unk|Mii55980_c0_g1_i1_6 len=1101	0,000	14,103	21	7	17	7	1	367	41,2	5,47	181331975	0,905	43,97	7
	Confidence	Sequence	Modifications	Qvality PEP	Qvality q-value	# Protein Groups	# Proteins	# PSMs	Master Protein Accessions	# Missed Cleavages	Theo. MH+ [Da]	Area: F2: Sample	XCorr Sequest HT	Confidence Sequest HT	Percolator q-Value Sequest HT	Percolator PEP Sequest HT
	High	AVFPSIVGRPR		0,00180944	0	1	19	4	unk	0	1198,70550	2.58513e+08	2,73	High	0	0,03185
	High	VAPEEHPVLLTEAPLNPK		6,02362E-06	0	1	11	5	unk	0	1954,06440	213099959	3,91	High	0	0,001196
	High	SYELPDGQVITIGNER		0,0302289	0	1	31	1	unk	0	1790,89192	7.23827e+07	1,10	High	0	0,1047
	High	DSYVGDEAQSKR		0,026482	0	1	18	1	unk	1	1354,62335	1.37285e+06	1,40	High	0	0,09629
	High	AGFAGDDAPR		0,0145991	0	1	21	2	unk	0	976,44828	2.13089e+07	2,12	High	0	0,06612
	High	HQGVMVGMGQK		0,0376886	0	1	26	2	unk	0	1171,57106	2.98557e+07	2,74	High	0	0,1206
	High	HQGVMVGMGQKDSYVGDEAQSKR		2,14243E-08	0	1	18	2	unk	2	2507,17657	6.46375e+07	4,74	High	0	0,0003403
High	unk	len=1531	>gnl|unk|Mii55690_c0_g1_i1_4 len=1531	0,000	14,103	15	7	17	7	1	510	57,8	7,27	181331975	0,682	43,97	7
	Confidence	Sequence	Modifications	Qvality PEP	Qvality q-value	# Protein Groups	# Proteins	# PSMs	Master Protein Accessions	# Missed Cleavages	Theo. MH+ [Da]	Area: F2: Sample	XCorr Sequest HT	Confidence Sequest HT	Percolator q-Value Sequest HT	Percolator PEP Sequest HT
	High	AVFPSIVGRPR		0,00180944	0	1	19	4	unk	0	1198,70550	2.58513e+08	2,73	High	0	0,03185
	High	VAPEEHPVLLTEAPLNPK		6,02362E-06	0	1	11	5	unk	0	1954,06440	213099959	3,91	High	0	0,001196
	High	SYELPDGQVITIGNER		0,0302289	0	1	31	1	unk	0	1790,89192	7.23827e+07	1,10	High	0	0,1047
	High	DSYVGDEAQSKR		0,026482	0	1	18	1	unk	1	1354,62335	1.37285e+06	1,40	High	0	0,09629
	High	AGFAGDDAPR		0,0145991	0	1	21	2	unk	0	976,44828	2.13089e+07	2,12	High	0	0,06612
	High	HQGVMVGMGQK		0,0376886	0	1	26	2	unk	0	1171,57106	2.98557e+07	2,74	High	0	0,1206
	High	HQGVMVGMGQKDSYVGDEAQSKR		2,14243E-08	0	1	18	2	unk	2	2507,17657	6.46375e+07	4,74	High	0	0,0003403
High	unk	len=946	>gnl|unk|Mii64514_c0_g1_i1_1 len=946	0,000	14,103	24	7	17	7	1	315	35,2	5,19	181331975	1,239	43,97	7
	Confidence	Sequence	Modifications	Qvality PEP	Qvality q-value	# Protein Groups	# Proteins	# PSMs	Master Protein Accessions	# Missed Cleavages	Theo. MH+ [Da]	Area: F2: Sample	XCorr Sequest HT	Confidence Sequest HT	Percolator q-Value Sequest HT	Percolator PEP Sequest HT
	High	AVFPSIVGRPR		0,00180944	0	1	19	4	unk	0	1198,70550	2.58513e+08	2,73	High	0	0,03185
	High	VAPEEHPVLLTEAPLNPK		6,02362E-06	0	1	11	5	unk	0	1954,06440	213099959	3,91	High	0	0,001196
	High	SYELPDGQVITIGNER		0,0302289	0	1	31	1	unk	0	1790,89192	7.23827e+07	1,10	High	0	0,1047
	High	DSYVGDEAQSKR		0,026482	0	1	18	1	unk	1	1354,62335	1.37285e+06	1,40	High	0	0,09629
	High	AGFAGDDAPR		0,0145991	0	1	21	2	unk	0	976,44828	2.13089e+07	2,12	High	0	0,06612
	High	HQGVMVGMGQK		0,0376886	0	1	26	2	unk	0	1171,57106	2.98557e+07	2,74	High	0	0,1206
	High	HQGVMVGMGQKDSYVGDEAQSKR		2,14243E-08	0	1	18	2	unk	2	2507,17657	6.46375e+07	4,74	High	0	0,0003403
High	unk	len=2112	>gnl|unk|Mii78791_c0_g1_i2_1 len=2112	0,000	13,347	20	9	13	9	1	704	79,4	6,83	7.96129e+07	0,658	26,64	9
	Confidence	Sequence	Modifications	Qvality PEP	Qvality q-value	# Protein Groups	# Proteins	# PSMs	Master Protein Accessions	# Missed Cleavages	Theo. MH+ [Da]	Area: F2: Sample	XCorr Sequest HT	Confidence Sequest HT	Percolator q-Value Sequest HT	Percolator PEP Sequest HT
	High	VYNNLHNTWLSK		0,0132684	0	1	8	1	unk	0	1488,75939	1.92414e+07	1,66	High	0	0,06217
	High	WTYTDNSPASFTK		0,000665749	0	1	8	3	unk	0	1517,69070	56580886	2,72	High	0	0,009189
	High	LKTFDEASDYCAGLGMK	1xCarbamidomethyl [C11]	0,218429	0	1	8	1	unk	1	1905,87211	2.02725e+07	1,42	High	0	0,3374
	High	TFDEASDYCAGLGMK	1xCarbamidomethyl [C9]	0,000237851	0	1	8	2	unk	0	1664,69308	3.17427e+07	2,84	High	0	0,01742
	High	SADCNYKLTSGSVVLNDLPTGDKCGR	2xCarbamidomethyl [C4; C24]	0,0342533	0	1	9	1	unk	2	2827,33492	2.07086e+07	1,39	High	0	0,1133
	High	GTFICESDHPECNYELQANAPLTHEVETGDQCGR	3xCarbamidomethyl [C5; C12; C32]	3,79603E-07	0	1	8	2	unk	0	3934,67014	1.34304e+08	4,83	High	0	7,798E-05
	High	GGWWYFGASDRGHEAK		0,128654	0	1	8	1	unk	1	1823,82484	18304212	2,02	High	0	0,2511
	High	YWIGANDRGQEGK		0,0456273	0	1	8	1	unk	1	1493,71317	47953787	2,23	High	0	0,1355
	High	FGNKGYLFSKK		0,0616785	0	1	8	1	unk	2	1288,70483	1.33255e+07	2,54	High	0	0,1631
High	unk	len=2171	>gnl|unk|Mii78791_c0_g1_i7_1 len=2171	0,000	13,347	19	9	13	9	1	724	81,5	7,33	7.96129e+07	0,619	26,64	9
	Confidence	Sequence	Modifications	Qvality PEP	Qvality q-value	# Protein Groups	# Proteins	# PSMs	Master Protein Accessions	# Missed Cleavages	Theo. MH+ [Da]	Area: F2: Sample	XCorr Sequest HT	Confidence Sequest HT	Percolator q-Value Sequest HT	Percolator PEP Sequest HT
	High	VYNNLHNTWLSK		0,0132684	0	1	8	1	unk	0	1488,75939	1.92414e+07	1,66	High	0	0,06217
	High	WTYTDNSPASFTK		0,000665749	0	1	8	3	unk	0	1517,69070	56580886	2,72	High	0	0,009189
	High	LKTFDEASDYCAGLGMK	1xCarbamidomethyl [C11]	0,218429	0	1	8	1	unk	1	1905,87211	2.02725e+07	1,42	High	0	0,3374
	High	TFDEASDYCAGLGMK	1xCarbamidomethyl [C9]	0,000237851	0	1	8	2	unk	0	1664,69308	3.17427e+07	2,84	High	0	0,01742
	High	SADCNYKLTSGSVVLNDLPTGDKCGR	2xCarbamidomethyl [C4; C24]	0,0342533	0	1	9	1	unk	2	2827,33492	2.07086e+07	1,39	High	0	0,1133
	High	GTFICESDHPECNYELQANAPLTHEVETGDQCGR	3xCarbamidomethyl [C5; C12; C32]	3,79603E-07	0	1	8	2	unk	0	3934,67014	1.34304e+08	4,83	High	0	7,798E-05
	High	GGWWYFGASDRGHEAK		0,128654	0	1	8	1	unk	1	1823,82484	18304212	2,02	High	0	0,2511
	High	YWIGANDRGQEGK		0,0456273	0	1	8	1	unk	1	1493,71317	47953787	2,23	High	0	0,1355
	High	FGNKGYLFSKK		0,0616785	0	1	8	1	unk	2	1288,70483	1.33255e+07	2,54	High	0	0,1631
High	unk	len=2256	>gnl|unk|Mii78791_c0_g1_i3_1 len=2256	0,000	13,347	18	9	13	9	1	752	84,9	7,11	7.96129e+07	0,554	26,64	9
	Confidence	Sequence	Modifications	Qvality PEP	Qvality q-value	# Protein Groups	# Proteins	# PSMs	Master Protein Accessions	# Missed Cleavages	Theo. MH+ [Da]	Area: F2: Sample	XCorr Sequest HT	Confidence Sequest HT	Percolator q-Value Sequest HT	Percolator PEP Sequest HT
	High	VYNNLHNTWLSK		0,0132684	0	1	8	1	unk	0	1488,75939	1.92414e+07	1,66	High	0	0,06217
	High	WTYTDNSPASFTK		0,000665749	0	1	8	3	unk	0	1517,69070	56580886	2,72	High	0	0,009189
	High	LKTFDEASDYCAGLGMK	1xCarbamidomethyl [C11]	0,218429	0	1	8	1	unk	1	1905,87211	2.02725e+07	1,42	High	0	0,3374
	High	TFDEASDYCAGLGMK	1xCarbamidomethyl [C9]	0,000237851	0	1	8	2	unk	0	1664,69308	3.17427e+07	2,84	High	0	0,01742
	High	SADCNYKLTSGSVVLNDLPTGDKCGR	2xCarbamidomethyl [C4; C24]	0,0342533	0	1	9	1	unk	2	2827,33492	2.07086e+07	1,39	High	0	0,1133
	High	GTFICESDHPECNYELQANAPLTHEVETGDQCGR	3xCarbamidomethyl [C5; C12; C32]	3,79603E-07	0	1	8	2	unk	0	3934,67014	1.34304e+08	4,83	High	0	7,798E-05
	High	GGWWYFGASDRGHEAK		0,128654	0	1	8	1	unk	1	1823,82484	18304212	2,02	High	0	0,2511
	High	YWIGANDRGQEGK		0,0456273	0	1	8	1	unk	1	1493,71317	47953787	2,23	High	0	0,1355
	High	FGNKGYLFSKK		0,0616785	0	1	8	1	unk	2	1288,70483	1.33255e+07	2,54	High	0	0,1631
High	unk	len=439	>gnl|unk|Mii64514_c0_g1_i2_1 len=439	0,000	13,123	42	6	16	6	1	146	16,4	6,68	1.7875e+08	2,511	43,97	6
	Confidence	Sequence	Modifications	Qvality PEP	Qvality q-value	# Protein Groups	# Proteins	# PSMs	Master Protein Accessions	# Missed Cleavages	Theo. MH+ [Da]	Area: F2: Sample	XCorr Sequest HT	Confidence Sequest HT	Percolator q-Value Sequest HT	Percolator PEP Sequest HT
	High	AVFPSIVGRPR		0,00180944	0	1	19	4	unk	0	1198,70550	2.58513e+08	2,73	High	0	0,03185
	High	VAPEEHPVLLTEAPLNPK		6,02362E-06	0	1	11	5	unk	0	1954,06440	213099959	3,91	High	0	0,001196
	High	DSYVGDEAQSKR		0,026482	0	1	18	1	unk	1	1354,62335	1.37285e+06	1,40	High	0	0,09629
	High	AGFAGDDAPR		0,0145991	0	1	21	2	unk	0	976,44828	2.13089e+07	2,12	High	0	0,06612
	High	HQGVMVGMGQK		0,0376886	0	1	26	2	unk	0	1171,57106	2.98557e+07	2,74	High	0	0,1206
	High	HQGVMVGMGQKDSYVGDEAQSKR		2,14243E-08	0	1	18	2	unk	2	2507,17657	6.46375e+07	4,74	High	0	0,0003403
High	unk	len=1691	>gnl|unk|Mii74473_c0_g1_i2_6 len=1691	0,000	12,716	22	8	14	8	1	563	64,6	7,69	7.42092e+07	0,624	30,74	8
	Confidence	Sequence	Modifications	Qvality PEP	Qvality q-value	# Protein Groups	# Proteins	# PSMs	Master Protein Accessions	# Missed Cleavages	Theo. MH+ [Da]	Area: F2: Sample	XCorr Sequest HT	Confidence Sequest HT	Percolator q-Value Sequest HT	Percolator PEP Sequest HT
	High	WTYTDNSPASFTK		0,000665749	0	1	8	3	unk	0	1517,69070	56580886	2,72	High	0	0,009189
	High	LKTFDEASDYCAGLGMK	1xCarbamidomethyl [C11]	0,218429	0	1	8	1	unk	1	1905,87211	2.02725e+07	1,42	High	0	0,3374
	High	TFDEASDYCAGLGMK	1xCarbamidomethyl [C9]	0,000237851	0	1	8	2	unk	0	1664,69308	3.17427e+07	2,84	High	0	0,01742
	High	SADCNYKLTSGSVVLNDLPTGDKCGR	2xCarbamidomethyl [C4; C24]	0,0342533	0	1	9	1	unk	2	2827,33492	2.07086e+07	1,39	High	0	0,1133
	High	GTFICESDHPECNYELQANAPLTHEVETGDQCGR	3xCarbamidomethyl [C5; C12; C32]	3,79603E-07	0	1	8	2	unk	0	3934,67014	1.34304e+08	4,83	High	0	7,798E-05
	High	GGWWYFGASDRGHEAK		0,128654	0	1	8	1	unk	1	1823,82484	18304212	2,02	High	0	0,2511
	High	WNPGQPDNAGHR		0,00565513	0	1	3	3	unk	0	1348,61412	1.31899e+07	3,10	High	0	0,03653
	High	FGNKGYLFSKK		0,0616785	0	1	8	1	unk	2	1288,70483	1.33255e+07	2,54	High	0	0,1631
High	unk	len=655	>gnl|unk|Mii24311_c0_g1_i1_5 len=655	0,000	11,943	23	5	14	5	1	218	24,4	5,44	1.7875e+08	1,276	39,90	5
	Confidence	Sequence	Modifications	Qvality PEP	Qvality q-value	# Protein Groups	# Proteins	# PSMs	Master Protein Accessions	# Missed Cleavages	Theo. MH+ [Da]	Area: F2: Sample	XCorr Sequest HT	Confidence Sequest HT	Percolator q-Value Sequest HT	Percolator PEP Sequest HT
	High	AVFPSIVGRPR		0,00180944	0	1	19	4	unk	0	1198,70550	2.58513e+08	2,73	High	0	0,03185
	High	VAPEEHPVLLTEAPLNPK		6,02362E-06	0	1	11	5	unk	0	1954,06440	213099959	3,91	High	0	0,001196
	High	DSYVGDEAQSKR		0,026482	0	1	18	1	unk	1	1354,62335	1.37285e+06	1,40	High	0	0,09629
	High	HQGVMVGMGQK		0,0376886	0	1	26	2	unk	0	1171,57106	2.98557e+07	2,74	High	0	0,1206
	High	HQGVMVGMGQKDSYVGDEAQSKR		2,14243E-08	0	1	18	2	unk	2	2507,17657	6.46375e+07	4,74	High	0	0,0003403
High	unk	len=1024	>gnl|unk|Mii61805_c3_g42_i1_4 len=1024; >gnl|unk|Mii61805_c3_g10_i1_4 len=1024	0,000	11,576	10	3	6	3	1	341	36,8	6,96	4.84558e+07	0,551	15,37	3
	Confidence	Sequence	Modifications	Qvality PEP	Qvality q-value	# Protein Groups	# Proteins	# PSMs	Master Protein Accessions	# Missed Cleavages	Theo. MH+ [Da]	Area: F2: Sample	XCorr Sequest HT	Confidence Sequest HT	Percolator q-Value Sequest HT	Percolator PEP Sequest HT
	High	CTIEPAYTSGDAFTK	1xCarbamidomethyl [C1]	0,000496129	0	1	34	2	unk	0	1660,75231	4.65053e+07	2,94	High	0	0,01731
	High	TCQDGSSTAHQVIK	1xCarbamidomethyl [C2]	4,58244E-05	0	1	34	2	unk	0	1531,71693	3.92807e+07	3,12	High	0	0,001664
	High	VNCDLKTCQDGSSTAHQVIK	2xCarbamidomethyl [C3; C8]	1,03831E-09	0	1	34	2	unk	1	2261,06489	5.95813e+07	4,29	High	0	1,792867E-06
High	unk	len=1024	>gnl|unk|Mii61805_c3_g6_i1_4 len=1024	0,000	11,576	10	3	6	3	1	341	36,9	7,20	4.84558e+07	0,551	15,37	3
	Confidence	Sequence	Modifications	Qvality PEP	Qvality q-value	# Protein Groups	# Proteins	# PSMs	Master Protein Accessions	# Missed Cleavages	Theo. MH+ [Da]	Area: F2: Sample	XCorr Sequest HT	Confidence Sequest HT	Percolator q-Value Sequest HT	Percolator PEP Sequest HT
	High	CTIEPAYTSGDAFTK	1xCarbamidomethyl [C1]	0,000496129	0	1	34	2	unk	0	1660,75231	4.65053e+07	2,94	High	0	0,01731
	High	TCQDGSSTAHQVIK	1xCarbamidomethyl [C2]	4,58244E-05	0	1	34	2	unk	0	1531,71693	3.92807e+07	3,12	High	0	0,001664
	High	VNCDLKTCQDGSSTAHQVIK	2xCarbamidomethyl [C3; C8]	1,03831E-09	0	1	34	2	unk	1	2261,06489	5.95813e+07	4,29	High	0	1,792867E-06
High	unk	len=1039	>gnl|unk|Mii61805_c3_g37_i1_4 len=1039	0,000	11,576	10	3	6	3	1	346	37,5	7,20	4.84558e+07	0,551	15,37	3
	Confidence	Sequence	Modifications	Qvality PEP	Qvality q-value	# Protein Groups	# Proteins	# PSMs	Master Protein Accessions	# Missed Cleavages	Theo. MH+ [Da]	Area: F2: Sample	XCorr Sequest HT	Confidence Sequest HT	Percolator q-Value Sequest HT	Percolator PEP Sequest HT
	High	CTIEPAYTSGDAFTK	1xCarbamidomethyl [C1]	0,000496129	0	1	34	2	unk	0	1660,75231	4.65053e+07	2,94	High	0	0,01731
	High	TCQDGSSTAHQVIK	1xCarbamidomethyl [C2]	4,58244E-05	0	1	34	2	unk	0	1531,71693	3.92807e+07	3,12	High	0	0,001664
	High	VNCDLKTCQDGSSTAHQVIK	2xCarbamidomethyl [C3; C8]	1,03831E-09	0	1	34	2	unk	1	2261,06489	5.95813e+07	4,29	High	0	1,792867E-06
High	unk	len=1021	>gnl|unk|Mii61805_c3_g17_i1_4 len=1021	0,000	11,576	10	3	6	3	1	340	36,7	6,96	4.84558e+07	0,551	15,37	3
	Confidence	Sequence	Modifications	Qvality PEP	Qvality q-value	# Protein Groups	# Proteins	# PSMs	Master Protein Accessions	# Missed Cleavages	Theo. MH+ [Da]	Area: F2: Sample	XCorr Sequest HT	Confidence Sequest HT	Percolator q-Value Sequest HT	Percolator PEP Sequest HT
	High	CTIEPAYTSGDAFTK	1xCarbamidomethyl [C1]	0,000496129	0	1	34	2	unk	0	1660,75231	4.65053e+07	2,94	High	0	0,01731
	High	TCQDGSSTAHQVIK	1xCarbamidomethyl [C2]	4,58244E-05	0	1	34	2	unk	0	1531,71693	3.92807e+07	3,12	High	0	0,001664
	High	VNCDLKTCQDGSSTAHQVIK	2xCarbamidomethyl [C3; C8]	1,03831E-09	0	1	34	2	unk	1	2261,06489	5.95813e+07	4,29	High	0	1,792867E-06
High	unk	len=1034	>gnl|unk|Mii61805_c3_g38_i1_5 len=1034	0,000	11,576	10	3	6	3	1	344	37,2	7,42	4.84558e+07	0,551	15,37	3
	Confidence	Sequence	Modifications	Qvality PEP	Qvality q-value	# Protein Groups	# Proteins	# PSMs	Master Protein Accessions	# Missed Cleavages	Theo. MH+ [Da]	Area: F2: Sample	XCorr Sequest HT	Confidence Sequest HT	Percolator q-Value Sequest HT	Percolator PEP Sequest HT
	High	CTIEPAYTSGDAFTK	1xCarbamidomethyl [C1]	0,000496129	0	1	34	2	unk	0	1660,75231	4.65053e+07	2,94	High	0	0,01731
	High	TCQDGSSTAHQVIK	1xCarbamidomethyl [C2]	4,58244E-05	0	1	34	2	unk	0	1531,71693	3.92807e+07	3,12	High	0	0,001664
	High	VNCDLKTCQDGSSTAHQVIK	2xCarbamidomethyl [C3; C8]	1,03831E-09	0	1	34	2	unk	1	2261,06489	5.95813e+07	4,29	High	0	1,792867E-06
High	unk	len=1024	>gnl|unk|Mii61805_c3_g33_i1_4 len=1024	0,000	11,576	10	3	6	3	1	341	36,8	6,96	4.84558e+07	0,551	15,37	3
	Confidence	Sequence	Modifications	Qvality PEP	Qvality q-value	# Protein Groups	# Proteins	# PSMs	Master Protein Accessions	# Missed Cleavages	Theo. MH+ [Da]	Area: F2: Sample	XCorr Sequest HT	Confidence Sequest HT	Percolator q-Value Sequest HT	Percolator PEP Sequest HT
	High	CTIEPAYTSGDAFTK	1xCarbamidomethyl [C1]	0,000496129	0	1	34	2	unk	0	1660,75231	4.65053e+07	2,94	High	0	0,01731
	High	TCQDGSSTAHQVIK	1xCarbamidomethyl [C2]	4,58244E-05	0	1	34	2	unk	0	1531,71693	3.92807e+07	3,12	High	0	0,001664
	High	VNCDLKTCQDGSSTAHQVIK	2xCarbamidomethyl [C3; C8]	1,03831E-09	0	1	34	2	unk	1	2261,06489	5.95813e+07	4,29	High	0	1,792867E-06
High	unk	len=1001	>gnl|unk|Mii61805_c3_g3_i1_5 len=1001	0,000	11,576	10	3	6	3	1	333	35,8	6,96	4.84558e+07	0,585	15,37	3
	Confidence	Sequence	Modifications	Qvality PEP	Qvality q-value	# Protein Groups	# Proteins	# PSMs	Master Protein Accessions	# Missed Cleavages	Theo. MH+ [Da]	Area: F2: Sample	XCorr Sequest HT	Confidence Sequest HT	Percolator q-Value Sequest HT	Percolator PEP Sequest HT
	High	CTIEPAYTSGDAFTK	1xCarbamidomethyl [C1]	0,000496129	0	1	34	2	unk	0	1660,75231	4.65053e+07	2,94	High	0	0,01731
	High	TCQDGSSTAHQVIK	1xCarbamidomethyl [C2]	4,58244E-05	0	1	34	2	unk	0	1531,71693	3.92807e+07	3,12	High	0	0,001664
	High	VNCDLKTCQDGSSTAHQVIK	2xCarbamidomethyl [C3; C8]	1,03831E-09	0	1	34	2	unk	1	2261,06489	5.95813e+07	4,29	High	0	1,792867E-06
High	unk	len=1034	>gnl|unk|Mii61805_c3_g29_i1_5 len=1034; >gnl|unk|Mii61805_c3_g44_i1_5 len=1034	0,000	11,576	10	3	6	3	1	344	37,2	7,42	4.84558e+07	0,551	15,37	3
	Confidence	Sequence	Modifications	Qvality PEP	Qvality q-value	# Protein Groups	# Proteins	# PSMs	Master Protein Accessions	# Missed Cleavages	Theo. MH+ [Da]	Area: F2: Sample	XCorr Sequest HT	Confidence Sequest HT	Percolator q-Value Sequest HT	Percolator PEP Sequest HT
	High	CTIEPAYTSGDAFTK	1xCarbamidomethyl [C1]	0,000496129	0	1	34	2	unk	0	1660,75231	4.65053e+07	2,94	High	0	0,01731
	High	TCQDGSSTAHQVIK	1xCarbamidomethyl [C2]	4,58244E-05	0	1	34	2	unk	0	1531,71693	3.92807e+07	3,12	High	0	0,001664
	High	VNCDLKTCQDGSSTAHQVIK	2xCarbamidomethyl [C3; C8]	1,03831E-09	0	1	34	2	unk	1	2261,06489	5.95813e+07	4,29	High	0	1,792867E-06
High	unk	len=1034	>gnl|unk|Mii61805_c3_g46_i1_5 len=1034	0,000	11,576	10	3	6	3	1	344	37,2	7,42	4.84558e+07	0,551	15,37	3
	Confidence	Sequence	Modifications	Qvality PEP	Qvality q-value	# Protein Groups	# Proteins	# PSMs	Master Protein Accessions	# Missed Cleavages	Theo. MH+ [Da]	Area: F2: Sample	XCorr Sequest HT	Confidence Sequest HT	Percolator q-Value Sequest HT	Percolator PEP Sequest HT
	High	CTIEPAYTSGDAFTK	1xCarbamidomethyl [C1]	0,000496129	0	1	34	2	unk	0	1660,75231	4.65053e+07	2,94	High	0	0,01731
	High	TCQDGSSTAHQVIK	1xCarbamidomethyl [C2]	4,58244E-05	0	1	34	2	unk	0	1531,71693	3.92807e+07	3,12	High	0	0,001664
	High	VNCDLKTCQDGSSTAHQVIK	2xCarbamidomethyl [C3; C8]	1,03831E-09	0	1	34	2	unk	1	2261,06489	5.95813e+07	4,29	High	0	1,792867E-06
High	unk	len=1024	>gnl|unk|Mii61805_c3_g21_i1_4 len=1024; >gnl|unk|Mii61805_c3_g34_i1_4 len=1024	0,000	11,576	10	3	6	3	1	341	36,8	7,20	4.84558e+07	0,551	15,37	3
	Confidence	Sequence	Modifications	Qvality PEP	Qvality q-value	# Protein Groups	# Proteins	# PSMs	Master Protein Accessions	# Missed Cleavages	Theo. MH+ [Da]	Area: F2: Sample	XCorr Sequest HT	Confidence Sequest HT	Percolator q-Value Sequest HT	Percolator PEP Sequest HT
	High	CTIEPAYTSGDAFTK	1xCarbamidomethyl [C1]	0,000496129	0	1	34	2	unk	0	1660,75231	4.65053e+07	2,94	High	0	0,01731
	High	TCQDGSSTAHQVIK	1xCarbamidomethyl [C2]	4,58244E-05	0	1	34	2	unk	0	1531,71693	3.92807e+07	3,12	High	0	0,001664
	High	VNCDLKTCQDGSSTAHQVIK	2xCarbamidomethyl [C3; C8]	1,03831E-09	0	1	34	2	unk	1	2261,06489	5.95813e+07	4,29	High	0	1,792867E-06
High	unk	len=1039	>gnl|unk|Mii61805_c3_g36_i1_4 len=1039	0,000	11,576	10	3	6	3	1	346	37,4	7,20	4.84558e+07	0,551	15,37	3
	Confidence	Sequence	Modifications	Qvality PEP	Qvality q-value	# Protein Groups	# Proteins	# PSMs	Master Protein Accessions	# Missed Cleavages	Theo. MH+ [Da]	Area: F2: Sample	XCorr Sequest HT	Confidence Sequest HT	Percolator q-Value Sequest HT	Percolator PEP Sequest HT
	High	CTIEPAYTSGDAFTK	1xCarbamidomethyl [C1]	0,000496129	0	1	34	2	unk	0	1660,75231	4.65053e+07	2,94	High	0	0,01731
	High	TCQDGSSTAHQVIK	1xCarbamidomethyl [C2]	4,58244E-05	0	1	34	2	unk	0	1531,71693	3.92807e+07	3,12	High	0	0,001664
	High	VNCDLKTCQDGSSTAHQVIK	2xCarbamidomethyl [C3; C8]	1,03831E-09	0	1	34	2	unk	1	2261,06489	5.95813e+07	4,29	High	0	1,792867E-06
High	unk	len=1015	>gnl|unk|Mii61805_c3_g13_i1_4 len=1015	0,000	11,576	10	3	6	3	1	338	36,5	6,96	4.84558e+07	0,585	15,37	3
	Confidence	Sequence	Modifications	Qvality PEP	Qvality q-value	# Protein Groups	# Proteins	# PSMs	Master Protein Accessions	# Missed Cleavages	Theo. MH+ [Da]	Area: F2: Sample	XCorr Sequest HT	Confidence Sequest HT	Percolator q-Value Sequest HT	Percolator PEP Sequest HT
	High	CTIEPAYTSGDAFTK	1xCarbamidomethyl [C1]	0,000496129	0	1	34	2	unk	0	1660,75231	4.65053e+07	2,94	High	0	0,01731
	High	TCQDGSSTAHQVIK	1xCarbamidomethyl [C2]	4,58244E-05	0	1	34	2	unk	0	1531,71693	3.92807e+07	3,12	High	0	0,001664
	High	VNCDLKTCQDGSSTAHQVIK	2xCarbamidomethyl [C3; C8]	1,03831E-09	0	1	34	2	unk	1	2261,06489	5.95813e+07	4,29	High	0	1,792867E-06
High	unk	len=1021	>gnl|unk|Mii61805_c3_g31_i1_4 len=1021	0,000	11,576	10	3	6	3	1	340	36,7	6,96	4.84558e+07	0,551	15,37	3
	Confidence	Sequence	Modifications	Qvality PEP	Qvality q-value	# Protein Groups	# Proteins	# PSMs	Master Protein Accessions	# Missed Cleavages	Theo. MH+ [Da]	Area: F2: Sample	XCorr Sequest HT	Confidence Sequest HT	Percolator q-Value Sequest HT	Percolator PEP Sequest HT
	High	CTIEPAYTSGDAFTK	1xCarbamidomethyl [C1]	0,000496129	0	1	34	2	unk	0	1660,75231	4.65053e+07	2,94	High	0	0,01731
	High	TCQDGSSTAHQVIK	1xCarbamidomethyl [C2]	4,58244E-05	0	1	34	2	unk	0	1531,71693	3.92807e+07	3,12	High	0	0,001664
	High	VNCDLKTCQDGSSTAHQVIK	2xCarbamidomethyl [C3; C8]	1,03831E-09	0	1	34	2	unk	1	2261,06489	5.95813e+07	4,29	High	0	1,792867E-06
High	unk	len=1021	>gnl|unk|Mii61805_c3_g40_i1_4 len=1021; >gnl|unk|Mii61805_c3_g20_i1_4 len=1021	0,000	11,576	10	3	6	3	1	340	36,7	6,73	4.84558e+07	0,551	15,37	3
	Confidence	Sequence	Modifications	Qvality PEP	Qvality q-value	# Protein Groups	# Proteins	# PSMs	Master Protein Accessions	# Missed Cleavages	Theo. MH+ [Da]	Area: F2: Sample	XCorr Sequest HT	Confidence Sequest HT	Percolator q-Value Sequest HT	Percolator PEP Sequest HT
	High	CTIEPAYTSGDAFTK	1xCarbamidomethyl [C1]	0,000496129	0	1	34	2	unk	0	1660,75231	4.65053e+07	2,94	High	0	0,01731
	High	TCQDGSSTAHQVIK	1xCarbamidomethyl [C2]	4,58244E-05	0	1	34	2	unk	0	1531,71693	3.92807e+07	3,12	High	0	0,001664
	High	VNCDLKTCQDGSSTAHQVIK	2xCarbamidomethyl [C3; C8]	1,03831E-09	0	1	34	2	unk	1	2261,06489	5.95813e+07	4,29	High	0	1,792867E-06
High	unk	len=1021	>gnl|unk|Mii61805_c3_g41_i1_4 len=1021; >gnl|unk|Mii61805_c3_g2_i1_4 len=1021	0,000	11,576	10	3	6	3	1	340	36,6	6,73	4.84558e+07	0,585	15,37	3
	Confidence	Sequence	Modifications	Qvality PEP	Qvality q-value	# Protein Groups	# Proteins	# PSMs	Master Protein Accessions	# Missed Cleavages	Theo. MH+ [Da]	Area: F2: Sample	XCorr Sequest HT	Confidence Sequest HT	Percolator q-Value Sequest HT	Percolator PEP Sequest HT
	High	CTIEPAYTSGDAFTK	1xCarbamidomethyl [C1]	0,000496129	0	1	34	2	unk	0	1660,75231	4.65053e+07	2,94	High	0	0,01731
	High	TCQDGSSTAHQVIK	1xCarbamidomethyl [C2]	4,58244E-05	0	1	34	2	unk	0	1531,71693	3.92807e+07	3,12	High	0	0,001664
	High	VNCDLKTCQDGSSTAHQVIK	2xCarbamidomethyl [C3; C8]	1,03831E-09	0	1	34	2	unk	1	2261,06489	5.95813e+07	4,29	High	0	1,792867E-06
High	unk	len=1021	>gnl|unk|Mii61805_c3_g25_i1_4 len=1021; >gnl|unk|Mii61805_c3_g8_i1_4 len=1021	0,000	11,576	10	3	6	3	1	340	36,7	6,96	4.84558e+07	0,551	15,37	3
	Confidence	Sequence	Modifications	Qvality PEP	Qvality q-value	# Protein Groups	# Proteins	# PSMs	Master Protein Accessions	# Missed Cleavages	Theo. MH+ [Da]	Area: F2: Sample	XCorr Sequest HT	Confidence Sequest HT	Percolator q-Value Sequest HT	Percolator PEP Sequest HT
	High	CTIEPAYTSGDAFTK	1xCarbamidomethyl [C1]	0,000496129	0	1	34	2	unk	0	1660,75231	4.65053e+07	2,94	High	0	0,01731
	High	TCQDGSSTAHQVIK	1xCarbamidomethyl [C2]	4,58244E-05	0	1	34	2	unk	0	1531,71693	3.92807e+07	3,12	High	0	0,001664
	High	VNCDLKTCQDGSSTAHQVIK	2xCarbamidomethyl [C3; C8]	1,03831E-09	0	1	34	2	unk	1	2261,06489	5.95813e+07	4,29	High	0	1,792867E-06
High	unk	len=1034	>gnl|unk|Mii61805_c3_g24_i1_5 len=1034	0,000	11,576	10	3	6	3	1	344	37,2	7,20	4.84558e+07	0,551	15,37	3
	Confidence	Sequence	Modifications	Qvality PEP	Qvality q-value	# Protein Groups	# Proteins	# PSMs	Master Protein Accessions	# Missed Cleavages	Theo. MH+ [Da]	Area: F2: Sample	XCorr Sequest HT	Confidence Sequest HT	Percolator q-Value Sequest HT	Percolator PEP Sequest HT
	High	CTIEPAYTSGDAFTK	1xCarbamidomethyl [C1]	0,000496129	0	1	34	2	unk	0	1660,75231	4.65053e+07	2,94	High	0	0,01731
	High	TCQDGSSTAHQVIK	1xCarbamidomethyl [C2]	4,58244E-05	0	1	34	2	unk	0	1531,71693	3.92807e+07	3,12	High	0	0,001664
	High	VNCDLKTCQDGSSTAHQVIK	2xCarbamidomethyl [C3; C8]	1,03831E-09	0	1	34	2	unk	1	2261,06489	5.95813e+07	4,29	High	0	1,792867E-06
High	unk	len=1024	>gnl|unk|Mii61805_c3_g43_i1_4 len=1024; >gnl|unk|Mii61805_c3_g7_i1_4 len=1024	0,000	11,576	10	3	6	3	1	341	36,8	7,20	4.84558e+07	0,551	15,37	3
	Confidence	Sequence	Modifications	Qvality PEP	Qvality q-value	# Protein Groups	# Proteins	# PSMs	Master Protein Accessions	# Missed Cleavages	Theo. MH+ [Da]	Area: F2: Sample	XCorr Sequest HT	Confidence Sequest HT	Percolator q-Value Sequest HT	Percolator PEP Sequest HT
	High	CTIEPAYTSGDAFTK	1xCarbamidomethyl [C1]	0,000496129	0	1	34	2	unk	0	1660,75231	4.65053e+07	2,94	High	0	0,01731
	High	TCQDGSSTAHQVIK	1xCarbamidomethyl [C2]	4,58244E-05	0	1	34	2	unk	0	1531,71693	3.92807e+07	3,12	High	0	0,001664
	High	VNCDLKTCQDGSSTAHQVIK	2xCarbamidomethyl [C3; C8]	1,03831E-09	0	1	34	2	unk	1	2261,06489	5.95813e+07	4,29	High	0	1,792867E-06
High	unk	len=1021	>gnl|unk|Mii61805_c3_g19_i1_4 len=1021	0,000	11,576	10	3	6	3	1	340	36,6	6,96	4.84558e+07	0,585	15,37	3
	Confidence	Sequence	Modifications	Qvality PEP	Qvality q-value	# Protein Groups	# Proteins	# PSMs	Master Protein Accessions	# Missed Cleavages	Theo. MH+ [Da]	Area: F2: Sample	XCorr Sequest HT	Confidence Sequest HT	Percolator q-Value Sequest HT	Percolator PEP Sequest HT
	High	CTIEPAYTSGDAFTK	1xCarbamidomethyl [C1]	0,000496129	0	1	34	2	unk	0	1660,75231	4.65053e+07	2,94	High	0	0,01731
	High	TCQDGSSTAHQVIK	1xCarbamidomethyl [C2]	4,58244E-05	0	1	34	2	unk	0	1531,71693	3.92807e+07	3,12	High	0	0,001664
	High	VNCDLKTCQDGSSTAHQVIK	2xCarbamidomethyl [C3; C8]	1,03831E-09	0	1	34	2	unk	1	2261,06489	5.95813e+07	4,29	High	0	1,792867E-06
High	unk	len=1021	>gnl|unk|Mii61805_c3_g4_i1_4 len=1021	0,000	11,576	10	3	6	3	1	340	36,7	6,96	4.84558e+07	0,551	15,37	3
	Confidence	Sequence	Modifications	Qvality PEP	Qvality q-value	# Protein Groups	# Proteins	# PSMs	Master Protein Accessions	# Missed Cleavages	Theo. MH+ [Da]	Area: F2: Sample	XCorr Sequest HT	Confidence Sequest HT	Percolator q-Value Sequest HT	Percolator PEP Sequest HT
	High	CTIEPAYTSGDAFTK	1xCarbamidomethyl [C1]	0,000496129	0	1	34	2	unk	0	1660,75231	4.65053e+07	2,94	High	0	0,01731
	High	TCQDGSSTAHQVIK	1xCarbamidomethyl [C2]	4,58244E-05	0	1	34	2	unk	0	1531,71693	3.92807e+07	3,12	High	0	0,001664
	High	VNCDLKTCQDGSSTAHQVIK	2xCarbamidomethyl [C3; C8]	1,03831E-09	0	1	34	2	unk	1	2261,06489	5.95813e+07	4,29	High	0	1,792867E-06
High	unk	len=1024	>gnl|unk|Mii61805_c3_g39_i1_4 len=1024	0,000	11,576	10	3	6	3	1	341	36,8	7,20	4.84558e+07	0,551	15,37	3
	Confidence	Sequence	Modifications	Qvality PEP	Qvality q-value	# Protein Groups	# Proteins	# PSMs	Master Protein Accessions	# Missed Cleavages	Theo. MH+ [Da]	Area: F2: Sample	XCorr Sequest HT	Confidence Sequest HT	Percolator q-Value Sequest HT	Percolator PEP Sequest HT
	High	CTIEPAYTSGDAFTK	1xCarbamidomethyl [C1]	0,000496129	0	1	34	2	unk	0	1660,75231	4.65053e+07	2,94	High	0	0,01731
	High	TCQDGSSTAHQVIK	1xCarbamidomethyl [C2]	4,58244E-05	0	1	34	2	unk	0	1531,71693	3.92807e+07	3,12	High	0	0,001664
	High	VNCDLKTCQDGSSTAHQVIK	2xCarbamidomethyl [C3; C8]	1,03831E-09	0	1	34	2	unk	1	2261,06489	5.95813e+07	4,29	High	0	1,792867E-06
High	unk	len=1021	>gnl|unk|Mii61805_c3_g16_i1_4 len=1021	0,000	11,576	10	3	6	3	1	340	36,6	6,73	4.84558e+07	0,585	15,37	3
	Confidence	Sequence	Modifications	Qvality PEP	Qvality q-value	# Protein Groups	# Proteins	# PSMs	Master Protein Accessions	# Missed Cleavages	Theo. MH+ [Da]	Area: F2: Sample	XCorr Sequest HT	Confidence Sequest HT	Percolator q-Value Sequest HT	Percolator PEP Sequest HT
	High	CTIEPAYTSGDAFTK	1xCarbamidomethyl [C1]	0,000496129	0	1	34	2	unk	0	1660,75231	4.65053e+07	2,94	High	0	0,01731
	High	TCQDGSSTAHQVIK	1xCarbamidomethyl [C2]	4,58244E-05	0	1	34	2	unk	0	1531,71693	3.92807e+07	3,12	High	0	0,001664
	High	VNCDLKTCQDGSSTAHQVIK	2xCarbamidomethyl [C3; C8]	1,03831E-09	0	1	34	2	unk	1	2261,06489	5.95813e+07	4,29	High	0	1,792867E-06
High	unk	len=1021	>gnl|unk|Mii61805_c3_g9_i1_4 len=1021; >gnl|unk|Mii61805_c3_g15_i1_4 len=1021	0,000	11,576	10	3	6	3	1	340	36,6	6,73	4.84558e+07	0,585	15,37	3
	Confidence	Sequence	Modifications	Qvality PEP	Qvality q-value	# Protein Groups	# Proteins	# PSMs	Master Protein Accessions	# Missed Cleavages	Theo. MH+ [Da]	Area: F2: Sample	XCorr Sequest HT	Confidence Sequest HT	Percolator q-Value Sequest HT	Percolator PEP Sequest HT
	High	CTIEPAYTSGDAFTK	1xCarbamidomethyl [C1]	0,000496129	0	1	34	2	unk	0	1660,75231	4.65053e+07	2,94	High	0	0,01731
	High	TCQDGSSTAHQVIK	1xCarbamidomethyl [C2]	4,58244E-05	0	1	34	2	unk	0	1531,71693	3.92807e+07	3,12	High	0	0,001664
	High	VNCDLKTCQDGSSTAHQVIK	2xCarbamidomethyl [C3; C8]	1,03831E-09	0	1	34	2	unk	1	2261,06489	5.95813e+07	4,29	High	0	1,792867E-06
High	unk	len=1024	>gnl|unk|Mii61805_c3_g14_i1_4 len=1024	0,000	11,576	10	3	6	3	1	341	36,8	7,20	4.84558e+07	0,551	15,37	3
	Confidence	Sequence	Modifications	Qvality PEP	Qvality q-value	# Protein Groups	# Proteins	# PSMs	Master Protein Accessions	# Missed Cleavages	Theo. MH+ [Da]	Area: F2: Sample	XCorr Sequest HT	Confidence Sequest HT	Percolator q-Value Sequest HT	Percolator PEP Sequest HT
	High	CTIEPAYTSGDAFTK	1xCarbamidomethyl [C1]	0,000496129	0	1	34	2	unk	0	1660,75231	4.65053e+07	2,94	High	0	0,01731
	High	TCQDGSSTAHQVIK	1xCarbamidomethyl [C2]	4,58244E-05	0	1	34	2	unk	0	1531,71693	3.92807e+07	3,12	High	0	0,001664
	High	VNCDLKTCQDGSSTAHQVIK	2xCarbamidomethyl [C3; C8]	1,03831E-09	0	1	34	2	unk	1	2261,06489	5.95813e+07	4,29	High	0	1,792867E-06
High	unk	len=1021	>gnl|unk|Mii61805_c3_g12_i1_4 len=1021; >gnl|unk|Mii61805_c3_g35_i1_4 len=1021	0,000	11,576	10	3	6	3	1	340	36,6	6,96	4.84558e+07	0,585	15,37	3
	Confidence	Sequence	Modifications	Qvality PEP	Qvality q-value	# Protein Groups	# Proteins	# PSMs	Master Protein Accessions	# Missed Cleavages	Theo. MH+ [Da]	Area: F2: Sample	XCorr Sequest HT	Confidence Sequest HT	Percolator q-Value Sequest HT	Percolator PEP Sequest HT
	High	CTIEPAYTSGDAFTK	1xCarbamidomethyl [C1]	0,000496129	0	1	34	2	unk	0	1660,75231	4.65053e+07	2,94	High	0	0,01731
	High	TCQDGSSTAHQVIK	1xCarbamidomethyl [C2]	4,58244E-05	0	1	34	2	unk	0	1531,71693	3.92807e+07	3,12	High	0	0,001664
	High	VNCDLKTCQDGSSTAHQVIK	2xCarbamidomethyl [C3; C8]	1,03831E-09	0	1	34	2	unk	1	2261,06489	5.95813e+07	4,29	High	0	1,792867E-06
High	unk	len=1039	>gnl|unk|Mii61805_c3_g47_i1_4 len=1039; >gnl|unk|Mii61805_c3_g11_i1_4 len=1039	0,000	11,576	10	3	6	3	1	346	37,4	7,20	4.84558e+07	0,551	15,37	3
	Confidence	Sequence	Modifications	Qvality PEP	Qvality q-value	# Protein Groups	# Proteins	# PSMs	Master Protein Accessions	# Missed Cleavages	Theo. MH+ [Da]	Area: F2: Sample	XCorr Sequest HT	Confidence Sequest HT	Percolator q-Value Sequest HT	Percolator PEP Sequest HT
	High	CTIEPAYTSGDAFTK	1xCarbamidomethyl [C1]	0,000496129	0	1	34	2	unk	0	1660,75231	4.65053e+07	2,94	High	0	0,01731
	High	TCQDGSSTAHQVIK	1xCarbamidomethyl [C2]	4,58244E-05	0	1	34	2	unk	0	1531,71693	3.92807e+07	3,12	High	0	0,001664
	High	VNCDLKTCQDGSSTAHQVIK	2xCarbamidomethyl [C3; C8]	1,03831E-09	0	1	34	2	unk	1	2261,06489	5.95813e+07	4,29	High	0	1,792867E-06
High	unk	len=1034	>gnl|unk|Mii61805_c3_g1_i1_5 len=1034; >gnl|unk|Mii61805_c3_g30_i1_5 len=1034	0,000	11,576	10	3	6	3	1	344	37,2	7,42	4.84558e+07	0,551	15,37	3
	Confidence	Sequence	Modifications	Qvality PEP	Qvality q-value	# Protein Groups	# Proteins	# PSMs	Master Protein Accessions	# Missed Cleavages	Theo. MH+ [Da]	Area: F2: Sample	XCorr Sequest HT	Confidence Sequest HT	Percolator q-Value Sequest HT	Percolator PEP Sequest HT
	High	CTIEPAYTSGDAFTK	1xCarbamidomethyl [C1]	0,000496129	0	1	34	2	unk	0	1660,75231	4.65053e+07	2,94	High	0	0,01731
	High	TCQDGSSTAHQVIK	1xCarbamidomethyl [C2]	4,58244E-05	0	1	34	2	unk	0	1531,71693	3.92807e+07	3,12	High	0	0,001664
	High	VNCDLKTCQDGSSTAHQVIK	2xCarbamidomethyl [C3; C8]	1,03831E-09	0	1	34	2	unk	1	2261,06489	5.95813e+07	4,29	High	0	1,792867E-06
High	unk	len=1034	>gnl|unk|Mii61805_c3_g32_i1_5 len=1034	0,000	11,576	10	3	6	3	1	344	37,2	7,42	4.84558e+07	0,551	15,37	3
	Confidence	Sequence	Modifications	Qvality PEP	Qvality q-value	# Protein Groups	# Proteins	# PSMs	Master Protein Accessions	# Missed Cleavages	Theo. MH+ [Da]	Area: F2: Sample	XCorr Sequest HT	Confidence Sequest HT	Percolator q-Value Sequest HT	Percolator PEP Sequest HT
	High	CTIEPAYTSGDAFTK	1xCarbamidomethyl [C1]	0,000496129	0	1	34	2	unk	0	1660,75231	4.65053e+07	2,94	High	0	0,01731
	High	TCQDGSSTAHQVIK	1xCarbamidomethyl [C2]	4,58244E-05	0	1	34	2	unk	0	1531,71693	3.92807e+07	3,12	High	0	0,001664
	High	VNCDLKTCQDGSSTAHQVIK	2xCarbamidomethyl [C3; C8]	1,03831E-09	0	1	34	2	unk	1	2261,06489	5.95813e+07	4,29	High	0	1,792867E-06
High	unk	len=1024	>gnl|unk|Mii61805_c3_g45_i1_4 len=1024	0,000	11,576	10	3	6	3	1	341	36,8	7,20	4.84558e+07	0,551	15,37	3
	Confidence	Sequence	Modifications	Qvality PEP	Qvality q-value	# Protein Groups	# Proteins	# PSMs	Master Protein Accessions	# Missed Cleavages	Theo. MH+ [Da]	Area: F2: Sample	XCorr Sequest HT	Confidence Sequest HT	Percolator q-Value Sequest HT	Percolator PEP Sequest HT
	High	CTIEPAYTSGDAFTK	1xCarbamidomethyl [C1]	0,000496129	0	1	34	2	unk	0	1660,75231	4.65053e+07	2,94	High	0	0,01731
	High	TCQDGSSTAHQVIK	1xCarbamidomethyl [C2]	4,58244E-05	0	1	34	2	unk	0	1531,71693	3.92807e+07	3,12	High	0	0,001664
	High	VNCDLKTCQDGSSTAHQVIK	2xCarbamidomethyl [C3; C8]	1,03831E-09	0	1	34	2	unk	1	2261,06489	5.95813e+07	4,29	High	0	1,792867E-06
High	unk	len=913	>gnl|unk|Mii65436_c1_g1_i1_2 len=913	0,000	11,576	11	3	6	3	1	304	32,3	7,20	4.84558e+07	0,719	15,37	3
	Confidence	Sequence	Modifications	Qvality PEP	Qvality q-value	# Protein Groups	# Proteins	# PSMs	Master Protein Accessions	# Missed Cleavages	Theo. MH+ [Da]	Area: F2: Sample	XCorr Sequest HT	Confidence Sequest HT	Percolator q-Value Sequest HT	Percolator PEP Sequest HT
	High	CTIEPAYTSGDAFTK	1xCarbamidomethyl [C1]	0,000496129	0	1	34	2	unk	0	1660,75231	4.65053e+07	2,94	High	0	0,01731
	High	TCQDGSSTAHQVIK	1xCarbamidomethyl [C2]	4,58244E-05	0	1	34	2	unk	0	1531,71693	3.92807e+07	3,12	High	0	0,001664
	High	VNCDLKTCQDGSSTAHQVIK	2xCarbamidomethyl [C3; C8]	1,03831E-09	0	1	34	2	unk	1	2261,06489	5.95813e+07	4,29	High	0	1,792867E-06
High	unk	len=987	>gnl|unk|Mii61805_c3_g28_i1_6 len=987; >gnl|unk|Mii61805_c3_g23_i1_6 len=987	0,000	11,576	10	3	6	3	1	328	35,3	6,96	4.84558e+07	0,585	15,37	3
	Confidence	Sequence	Modifications	Qvality PEP	Qvality q-value	# Protein Groups	# Proteins	# PSMs	Master Protein Accessions	# Missed Cleavages	Theo. MH+ [Da]	Area: F2: Sample	XCorr Sequest HT	Confidence Sequest HT	Percolator q-Value Sequest HT	Percolator PEP Sequest HT
	High	CTIEPAYTSGDAFTK	1xCarbamidomethyl [C1]	0,000496129	0	1	34	2	unk	0	1660,75231	4.65053e+07	2,94	High	0	0,01731
	High	TCQDGSSTAHQVIK	1xCarbamidomethyl [C2]	4,58244E-05	0	1	34	2	unk	0	1531,71693	3.92807e+07	3,12	High	0	0,001664
	High	VNCDLKTCQDGSSTAHQVIK	2xCarbamidomethyl [C3; C8]	1,03831E-09	0	1	34	2	unk	1	2261,06489	5.95813e+07	4,29	High	0	1,792867E-06
High	unk	len=1021	>gnl|unk|Mii61805_c3_g22_i1_4 len=1021; >gnl|unk|Mii61805_c3_g26_i1_4 len=1021	0,000	11,576	10	3	6	3	1	340	36,7	6,96	4.84558e+07	0,551	15,37	3
	Confidence	Sequence	Modifications	Qvality PEP	Qvality q-value	# Protein Groups	# Proteins	# PSMs	Master Protein Accessions	# Missed Cleavages	Theo. MH+ [Da]	Area: F2: Sample	XCorr Sequest HT	Confidence Sequest HT	Percolator q-Value Sequest HT	Percolator PEP Sequest HT
	High	CTIEPAYTSGDAFTK	1xCarbamidomethyl [C1]	0,000496129	0	1	34	2	unk	0	1660,75231	4.65053e+07	2,94	High	0	0,01731
	High	TCQDGSSTAHQVIK	1xCarbamidomethyl [C2]	4,58244E-05	0	1	34	2	unk	0	1531,71693	3.92807e+07	3,12	High	0	0,001664
	High	VNCDLKTCQDGSSTAHQVIK	2xCarbamidomethyl [C3; C8]	1,03831E-09	0	1	34	2	unk	1	2261,06489	5.95813e+07	4,29	High	0	1,792867E-06
High	unk	len=1024	>gnl|unk|Mii61805_c3_g18_i1_4 len=1024; >gnl|unk|Mii61805_c3_g5_i1_4 len=1024	0,000	11,576	10	3	6	3	1	341	36,8	7,20	4.84558e+07	0,551	15,37	3
	Confidence	Sequence	Modifications	Qvality PEP	Qvality q-value	# Protein Groups	# Proteins	# PSMs	Master Protein Accessions	# Missed Cleavages	Theo. MH+ [Da]	Area: F2: Sample	XCorr Sequest HT	Confidence Sequest HT	Percolator q-Value Sequest HT	Percolator PEP Sequest HT
	High	CTIEPAYTSGDAFTK	1xCarbamidomethyl [C1]	0,000496129	0	1	34	2	unk	0	1660,75231	4.65053e+07	2,94	High	0	0,01731
	High	TCQDGSSTAHQVIK	1xCarbamidomethyl [C2]	4,58244E-05	0	1	34	2	unk	0	1531,71693	3.92807e+07	3,12	High	0	0,001664
	High	VNCDLKTCQDGSSTAHQVIK	2xCarbamidomethyl [C3; C8]	1,03831E-09	0	1	34	2	unk	1	2261,06489	5.95813e+07	4,29	High	0	1,792867E-06
High	unk	len=1021	>gnl|unk|Mii61805_c3_g27_i1_4 len=1021	0,000	11,576	10	3	6	3	1	340	36,6	6,73	4.84558e+07	0,585	15,37	3
	Confidence	Sequence	Modifications	Qvality PEP	Qvality q-value	# Protein Groups	# Proteins	# PSMs	Master Protein Accessions	# Missed Cleavages	Theo. MH+ [Da]	Area: F2: Sample	XCorr Sequest HT	Confidence Sequest HT	Percolator q-Value Sequest HT	Percolator PEP Sequest HT
	High	CTIEPAYTSGDAFTK	1xCarbamidomethyl [C1]	0,000496129	0	1	34	2	unk	0	1660,75231	4.65053e+07	2,94	High	0	0,01731
	High	TCQDGSSTAHQVIK	1xCarbamidomethyl [C2]	4,58244E-05	0	1	34	2	unk	0	1531,71693	3.92807e+07	3,12	High	0	0,001664
	High	VNCDLKTCQDGSSTAHQVIK	2xCarbamidomethyl [C3; C8]	1,03831E-09	0	1	34	2	unk	1	2261,06489	5.95813e+07	4,29	High	0	1,792867E-06
High	unk	len=537	>gnl|unk|Mii37816_c0_g1_i1_2 len=537	0,000	10,183	23	4	10	4	1	178	20,1	6,42	1.02531e+08	1,31	29,64	4
	Confidence	Sequence	Modifications	Qvality PEP	Qvality q-value	# Protein Groups	# Proteins	# PSMs	Master Protein Accessions	# Missed Cleavages	Theo. MH+ [Da]	Area: F2: Sample	XCorr Sequest HT	Confidence Sequest HT	Percolator q-Value Sequest HT	Percolator PEP Sequest HT
	High	VAPEEHPVLLTEAPLNPK		6,02362E-06	0	1	11	5	unk	0	1954,06440	213099959	3,91	High	0	0,001196
	High	DSYVGDEAQSKR		0,026482	0	1	18	1	unk	1	1354,62335	1.37285e+06	1,40	High	0	0,09629
	High	HQGVMVGMGQK		0,0376886	0	1	26	2	unk	0	1171,57106	2.98557e+07	2,74	High	0	0,1206
	High	HQGVMVGMGQKDSYVGDEAQSKR		2,14243E-08	0	1	18	2	unk	2	2507,17657	6.46375e+07	4,74	High	0	0,0003403
High	unk	len=227	>gnl|unk|Mii27308_c0_g1_i1_4 len=227	0,000	9,780	58	5	11	5	1	75	8,4	7,52	1.17669e+08	4,179	28,42	5
	Confidence	Sequence	Modifications	Qvality PEP	Qvality q-value	# Protein Groups	# Proteins	# PSMs	Master Protein Accessions	# Missed Cleavages	Theo. MH+ [Da]	Area: F2: Sample	XCorr Sequest HT	Confidence Sequest HT	Percolator q-Value Sequest HT	Percolator PEP Sequest HT
	High	AVFPSIVGRPR		0,00180944	0	1	19	4	unk	0	1198,70550	2.58513e+08	2,73	High	0	0,03185
	High	DSYVGDEAQSKR		0,026482	0	1	18	1	unk	1	1354,62335	1.37285e+06	1,40	High	0	0,09629
	High	AGFAGDDAPR		0,0145991	0	1	21	2	unk	0	976,44828	2.13089e+07	2,12	High	0	0,06612
	High	HQGVMVGMGQK		0,0376886	0	1	26	2	unk	0	1171,57106	2.98557e+07	2,74	High	0	0,1206
	High	HQGVMVGMGQKDSYVGDEAQSKR		2,14243E-08	0	1	18	2	unk	2	2507,17657	6.46375e+07	4,74	High	0	0,0003403
High	unk	len=396	>gnl|unk|Mii50925_c0_g1_i2_2 len=396	0,000	9,780	33,587786259542	5	11	5	1	131	14,6	6,16	1.17669e+08	2,162	28,42	5
	Confidence	Sequence	Modifications	Qvality PEP	Qvality q-value	# Protein Groups	# Proteins	# PSMs	Master Protein Accessions	# Missed Cleavages	Theo. MH+ [Da]	Area: F2: Sample	XCorr Sequest HT	Confidence Sequest HT	Percolator q-Value Sequest HT	Percolator PEP Sequest HT
	High	AVFPSIVGRPR		0,00180944	0	1	19	4	unk	0	1198,70550	2.58513e+08	2,73	High	0	0,03185
	High	DSYVGDEAQSKR		0,026482	0	1	18	1	unk	1	1354,62335	1.37285e+06	1,40	High	0	0,09629
	High	AGFAGDDAPR		0,0145991	0	1	21	2	unk	0	976,44828	2.13089e+07	2,12	High	0	0,06612
	High	HQGVMVGMGQK		0,0376886	0	1	26	2	unk	0	1171,57106	2.98557e+07	2,74	High	0	0,1206
	High	HQGVMVGMGQKDSYVGDEAQSKR		2,14243E-08	0	1	18	2	unk	2	2507,17657	6.46375e+07	4,74	High	0	0,0003403
High	unk	len=581	>gnl|unk|Mii23973_c0_g1_i1_4 len=581	0,000	9,780	22	5	11	5	1	193	21,2	5,36	1.17669e+08	1,424	28,42	5
	Confidence	Sequence	Modifications	Qvality PEP	Qvality q-value	# Protein Groups	# Proteins	# PSMs	Master Protein Accessions	# Missed Cleavages	Theo. MH+ [Da]	Area: F2: Sample	XCorr Sequest HT	Confidence Sequest HT	Percolator q-Value Sequest HT	Percolator PEP Sequest HT
	High	AVFPSIVGRPR		0,00180944	0	1	19	4	unk	0	1198,70550	2.58513e+08	2,73	High	0	0,03185
	High	DSYVGDEAQSKR		0,026482	0	1	18	1	unk	1	1354,62335	1.37285e+06	1,40	High	0	0,09629
	High	AGFAGDDAPR		0,0145991	0	1	21	2	unk	0	976,44828	2.13089e+07	2,12	High	0	0,06612
	High	HQGVMVGMGQK		0,0376886	0	1	26	2	unk	0	1171,57106	2.98557e+07	2,74	High	0	0,1206
	High	HQGVMVGMGQKDSYVGDEAQSKR		2,14243E-08	0	1	18	2	unk	2	2507,17657	6.46375e+07	4,74	High	0	0,0003403
High	unk	len=403	>gnl|unk|Mii103221_c0_g1_i1_5 len=403	0,000	9,780	32	5	11	5	1	134	14,8	7,37	1.17669e+08	2,594	28,42	5
	Confidence	Sequence	Modifications	Qvality PEP	Qvality q-value	# Protein Groups	# Proteins	# PSMs	Master Protein Accessions	# Missed Cleavages	Theo. MH+ [Da]	Area: F2: Sample	XCorr Sequest HT	Confidence Sequest HT	Percolator q-Value Sequest HT	Percolator PEP Sequest HT
	High	AVFPSIVGRPR		0,00180944	0	1	19	4	unk	0	1198,70550	2.58513e+08	2,73	High	0	0,03185
	High	DSYVGDEAQSKR		0,026482	0	1	18	1	unk	1	1354,62335	1.37285e+06	1,40	High	0	0,09629
	High	AGFAGDDAPR		0,0145991	0	1	21	2	unk	0	976,44828	2.13089e+07	2,12	High	0	0,06612
	High	HQGVMVGMGQK		0,0376886	0	1	26	2	unk	0	1171,57106	2.98557e+07	2,74	High	0	0,1206
	High	HQGVMVGMGQKDSYVGDEAQSKR		2,14243E-08	0	1	18	2	unk	2	2507,17657	6.46375e+07	4,74	High	0	0,0003403
High	unk	len=384	>gnl|unk|Mii50925_c0_g1_i1_2 len=384	0,000	9,780	34	5	11	5	1	127	14,1	6,16	1.17669e+08	2,162	28,42	5
	Confidence	Sequence	Modifications	Qvality PEP	Qvality q-value	# Protein Groups	# Proteins	# PSMs	Master Protein Accessions	# Missed Cleavages	Theo. MH+ [Da]	Area: F2: Sample	XCorr Sequest HT	Confidence Sequest HT	Percolator q-Value Sequest HT	Percolator PEP Sequest HT
	High	AVFPSIVGRPR		0,00180944	0	1	19	4	unk	0	1198,70550	2.58513e+08	2,73	High	0	0,03185
	High	DSYVGDEAQSKR		0,026482	0	1	18	1	unk	1	1354,62335	1.37285e+06	1,40	High	0	0,09629
	High	AGFAGDDAPR		0,0145991	0	1	21	2	unk	0	976,44828	2.13089e+07	2,12	High	0	0,06612
	High	HQGVMVGMGQK		0,0376886	0	1	26	2	unk	0	1171,57106	2.98557e+07	2,74	High	0	0,1206
	High	HQGVMVGMGQKDSYVGDEAQSKR		2,14243E-08	0	1	18	2	unk	2	2507,17657	6.46375e+07	4,74	High	0	0,0003403
High	unk	len=541	>gnl|unk|Mii58597_c0_g1_i1_1 len=541	0,000	9,780	24	5	11	5	1	180	19,9	5,54	1.17669e+08	1,848	28,42	5
	Confidence	Sequence	Modifications	Qvality PEP	Qvality q-value	# Protein Groups	# Proteins	# PSMs	Master Protein Accessions	# Missed Cleavages	Theo. MH+ [Da]	Area: F2: Sample	XCorr Sequest HT	Confidence Sequest HT	Percolator q-Value Sequest HT	Percolator PEP Sequest HT
	High	AVFPSIVGRPR		0,00180944	0	1	19	4	unk	0	1198,70550	2.58513e+08	2,73	High	0	0,03185
	High	DSYVGDEAQSKR		0,026482	0	1	18	1	unk	1	1354,62335	1.37285e+06	1,40	High	0	0,09629
	High	AGFAGDDAPR		0,0145991	0	1	21	2	unk	0	976,44828	2.13089e+07	2,12	High	0	0,06612
	High	HQGVMVGMGQK		0,0376886	0	1	26	2	unk	0	1171,57106	2.98557e+07	2,74	High	0	0,1206
	High	HQGVMVGMGQKDSYVGDEAQSKR		2,14243E-08	0	1	18	2	unk	2	2507,17657	6.46375e+07	4,74	High	0	0,0003403
High	unk	len=406	>gnl|unk|Mii102888_c0_g1_i1_4 len=406	0,000	9,780	32	5	11	5	1	135	14,7	5,99	1.17669e+08	2,162	28,42	5
	Confidence	Sequence	Modifications	Qvality PEP	Qvality q-value	# Protein Groups	# Proteins	# PSMs	Master Protein Accessions	# Missed Cleavages	Theo. MH+ [Da]	Area: F2: Sample	XCorr Sequest HT	Confidence Sequest HT	Percolator q-Value Sequest HT	Percolator PEP Sequest HT
	High	AVFPSIVGRPR		0,00180944	0	1	19	4	unk	0	1198,70550	2.58513e+08	2,73	High	0	0,03185
	High	DSYVGDEAQSKR		0,026482	0	1	18	1	unk	1	1354,62335	1.37285e+06	1,40	High	0	0,09629
	High	AGFAGDDAPR		0,0145991	0	1	21	2	unk	0	976,44828	2.13089e+07	2,12	High	0	0,06612
	High	HQGVMVGMGQK		0,0376886	0	1	26	2	unk	0	1171,57106	2.98557e+07	2,74	High	0	0,1206
	High	HQGVMVGMGQKDSYVGDEAQSKR		2,14243E-08	0	1	18	2	unk	2	2507,17657	6.46375e+07	4,74	High	0	0,0003403
High	unk	len=335	>gnl|unk|Mii27308_c0_g2_i1_4 len=335	0,000	9,780	39	5	11	5	1	111	12,0	6,52	1.17669e+08	2,594	28,42	5
	Confidence	Sequence	Modifications	Qvality PEP	Qvality q-value	# Protein Groups	# Proteins	# PSMs	Master Protein Accessions	# Missed Cleavages	Theo. MH+ [Da]	Area: F2: Sample	XCorr Sequest HT	Confidence Sequest HT	Percolator q-Value Sequest HT	Percolator PEP Sequest HT
	High	AVFPSIVGRPR		0,00180944	0	1	19	4	unk	0	1198,70550	2.58513e+08	2,73	High	0	0,03185
	High	DSYVGDEAQSKR		0,026482	0	1	18	1	unk	1	1354,62335	1.37285e+06	1,40	High	0	0,09629
	High	AGFAGDDAPR		0,0145991	0	1	21	2	unk	0	976,44828	2.13089e+07	2,12	High	0	0,06612
	High	HQGVMVGMGQK		0,0376886	0	1	26	2	unk	0	1171,57106	2.98557e+07	2,74	High	0	0,1206
	High	HQGVMVGMGQKDSYVGDEAQSKR		2,14243E-08	0	1	18	2	unk	2	2507,17657	6.46375e+07	4,74	High	0	0,0003403
High	unk	len=235	>gnl|unk|Mii68875_c0_g1_i1_6 len=235	0,000	8,601	43	4	9	4	1	78	9,1	7,05	1.17669e+08	2,728	24,35	4
	Confidence	Sequence	Modifications	Qvality PEP	Qvality q-value	# Protein Groups	# Proteins	# PSMs	Master Protein Accessions	# Missed Cleavages	Theo. MH+ [Da]	Area: F2: Sample	XCorr Sequest HT	Confidence Sequest HT	Percolator q-Value Sequest HT	Percolator PEP Sequest HT
	High	AVFPSIVGRPR		0,00180944	0	1	19	4	unk	0	1198,70550	2.58513e+08	2,73	High	0	0,03185
	High	DSYVGDEAQSKR		0,026482	0	1	18	1	unk	1	1354,62335	1.37285e+06	1,40	High	0	0,09629
	High	HQGVMVGMGQK		0,0376886	0	1	26	2	unk	0	1171,57106	2.98557e+07	2,74	High	0	0,1206
	High	HQGVMVGMGQKDSYVGDEAQSKR		2,14243E-08	0	1	18	2	unk	2	2507,17657	6.46375e+07	4,74	High	0	0,0003403
High	unk	len=2361	>gnl|unk|Mii63177_c1_g1_i1_5 len=2361	0,000	7,428	4,4529262086514	3	5	3	1	786	89,6	6,89	2.89299e+07	0,184	7,97	3
	Confidence	Sequence	Modifications	Qvality PEP	Qvality q-value	# Protein Groups	# Proteins	# PSMs	Master Protein Accessions	# Missed Cleavages	Theo. MH+ [Da]	Area: F2: Sample	XCorr Sequest HT	Confidence Sequest HT	Percolator q-Value Sequest HT	Percolator PEP Sequest HT
	High	GHYTEGAELVDSVLDVVRK		0,00114706	0	1	15	1	unk	1	2087,07676	16780264	3,22	High	0	0,01305
	High	INVYYNEATGGKYVPR		4,30757E-08	0	1	7	2	unk	1	1843,93372	5.29078e+07	3,09	High	0	1,939E-05
	High	INVYYNEATGGK		0,0524675	0	1	7	2	unk	0	1328,64811	1.71016e+07	1,67	High	0	0,1474
High	unk	len=1844	>gnl|unk|Mii64848_c0_g1_i1_1 len=1844	0,000	7,428	5	3	5	3	1	614	69,8	5,73	2.89299e+07	0,241	7,97	3
	Confidence	Sequence	Modifications	Qvality PEP	Qvality q-value	# Protein Groups	# Proteins	# PSMs	Master Protein Accessions	# Missed Cleavages	Theo. MH+ [Da]	Area: F2: Sample	XCorr Sequest HT	Confidence Sequest HT	Percolator q-Value Sequest HT	Percolator PEP Sequest HT
	High	GHYTEGAELVDSVLDVVRK		0,00114706	0	1	15	1	unk	1	2087,07676	16780264	3,22	High	0	0,01305
	High	INVYYNEATGGKYVPR		4,30757E-08	0	1	7	2	unk	1	1843,93372	5.29078e+07	3,09	High	0	1,939E-05
	High	INVYYNEATGGK		0,0524675	0	1	7	2	unk	0	1328,64811	1.71016e+07	1,67	High	0	0,1474
High	unk	len=831	>gnl|unk|Mii70827_c0_g1_i2_2 len=831	0,000	7,428	12	3	5	3	1	277	30,5	5,34	2.89299e+07	0,638	7,97	3
	Confidence	Sequence	Modifications	Qvality PEP	Qvality q-value	# Protein Groups	# Proteins	# PSMs	Master Protein Accessions	# Missed Cleavages	Theo. MH+ [Da]	Area: F2: Sample	XCorr Sequest HT	Confidence Sequest HT	Percolator q-Value Sequest HT	Percolator PEP Sequest HT
	High	GHYTEGAELVDSVLDVVRK		0,00114706	0	1	15	1	unk	1	2087,07676	16780264	3,22	High	0	0,01305
	High	INVYYNEATGGKYVPR		4,30757E-08	0	1	7	2	unk	1	1843,93372	5.29078e+07	3,09	High	0	1,939E-05
	High	INVYYNEATGGK		0,0524675	0	1	7	2	unk	0	1328,64811	1.71016e+07	1,67	High	0	0,1474
High	unk	len=803	>gnl|unk|Mii70827_c0_g1_i3_1 len=803	0,000	7,428	13	3	5	3	1	268	29,2	4,96	2.89299e+07	0,638	7,97	3
	Confidence	Sequence	Modifications	Qvality PEP	Qvality q-value	# Protein Groups	# Proteins	# PSMs	Master Protein Accessions	# Missed Cleavages	Theo. MH+ [Da]	Area: F2: Sample	XCorr Sequest HT	Confidence Sequest HT	Percolator q-Value Sequest HT	Percolator PEP Sequest HT
	High	GHYTEGAELVDSVLDVVRK		0,00114706	0	1	15	1	unk	1	2087,07676	16780264	3,22	High	0	0,01305
	High	INVYYNEATGGKYVPR		4,30757E-08	0	1	7	2	unk	1	1843,93372	5.29078e+07	3,09	High	0	1,939E-05
	High	INVYYNEATGGK		0,0524675	0	1	7	2	unk	0	1328,64811	1.71016e+07	1,67	High	0	0,1474
High	unk	len=1006	>gnl|unk|Mii62774_c0_g1_i1_5 len=1006	0,000	7,428	10	3	5	3	1	335	37,3	6,23	2.89299e+07	0,438	7,97	3
	Confidence	Sequence	Modifications	Qvality PEP	Qvality q-value	# Protein Groups	# Proteins	# PSMs	Master Protein Accessions	# Missed Cleavages	Theo. MH+ [Da]	Area: F2: Sample	XCorr Sequest HT	Confidence Sequest HT	Percolator q-Value Sequest HT	Percolator PEP Sequest HT
	High	GHYTEGAELVDSVLDVVRK		0,00114706	0	1	15	1	unk	1	2087,07676	16780264	3,22	High	0	0,01305
	High	INVYYNEATGGKYVPR		4,30757E-08	0	1	7	2	unk	1	1843,93372	5.29078e+07	3,09	High	0	1,939E-05
	High	INVYYNEATGGK		0,0524675	0	1	7	2	unk	0	1328,64811	1.71016e+07	1,67	High	0	0,1474
High	unk	len=1672	>gnl|unk|Mii69743_c0_g1_i1_5 len=1672	0,000	7,428	6	3	5	3	1	557	62,8	4,87	2.89299e+07	0,292	7,97	3
	Confidence	Sequence	Modifications	Qvality PEP	Qvality q-value	# Protein Groups	# Proteins	# PSMs	Master Protein Accessions	# Missed Cleavages	Theo. MH+ [Da]	Area: F2: Sample	XCorr Sequest HT	Confidence Sequest HT	Percolator q-Value Sequest HT	Percolator PEP Sequest HT
	High	GHYTEGAELVDSVLDVVRK		0,00114706	0	1	15	1	unk	1	2087,07676	16780264	3,22	High	0	0,01305
	High	INVYYNEATGGKYVPR		4,30757E-08	0	1	7	2	unk	1	1843,93372	5.29078e+07	3,09	High	0	1,939E-05
	High	INVYYNEATGGK		0,0524675	0	1	7	2	unk	0	1328,64811	1.71016e+07	1,67	High	0	0,1474
High	unk	len=1503	>gnl|unk|Mii70827_c0_g1_i1_2 len=1503	0,000	7,428	7	3	5	3	1	500	56,1	5,05	2.89299e+07	0,304	7,97	3
	Confidence	Sequence	Modifications	Qvality PEP	Qvality q-value	# Protein Groups	# Proteins	# PSMs	Master Protein Accessions	# Missed Cleavages	Theo. MH+ [Da]	Area: F2: Sample	XCorr Sequest HT	Confidence Sequest HT	Percolator q-Value Sequest HT	Percolator PEP Sequest HT
	High	GHYTEGAELVDSVLDVVRK		0,00114706	0	1	15	1	unk	1	2087,07676	16780264	3,22	High	0	0,01305
	High	INVYYNEATGGKYVPR		4,30757E-08	0	1	7	2	unk	1	1843,93372	5.29078e+07	3,09	High	0	1,939E-05
	High	INVYYNEATGGK		0,0524675	0	1	7	2	unk	0	1328,64811	1.71016e+07	1,67	High	0	0,1474
High	unk	len=1105	>gnl|unk|Mii73416_c1_g1_i1_3 len=1105	0,000	7,374	18	5	11	5	1	368	40,2	8,79	8.51243e+07	0,585	23,23	5
	Confidence	Sequence	Modifications	Qvality PEP	Qvality q-value	# Protein Groups	# Proteins	# PSMs	Master Protein Accessions	# Missed Cleavages	Theo. MH+ [Da]	Area: F2: Sample	XCorr Sequest HT	Confidence Sequest HT	Percolator q-Value Sequest HT	Percolator PEP Sequest HT
	High	LTFTKDAVLVTK		0,0013785	0	1	7	3	unk	1	1335,78823	4.16126e+07	3,51	High	0	0,01462
	High	LNNLLESPLEELKSVVLIVR		0,000660872	0	1	8	1	unk	1	2278,33806		3,27	High	0	0,009162
	High	SIPNLDPSKVK		0,00841122	0	1	6	3	unk	1	1197,68376	116610401	2,47	High	0	0,05537
	High	GVTLPKGDTTVVVK		0,00477536	0	1	6	3	unk	1	1413,83116	8.79754e+07	2,47	High	0	0,0601
	High	VQLISEKTFK		0,094476	0	1	6	1	unk	1	1192,69360	5.07871e+07	2,15	High	0	0,2098
High	unk	len=1200	>gnl|unk|Mii73416_c1_g1_i2_3 len=1200	0,000	7,374	16	5	11	5	1	399	43,7	8,88	8.51243e+07	0,532	23,23	5
	Confidence	Sequence	Modifications	Qvality PEP	Qvality q-value	# Protein Groups	# Proteins	# PSMs	Master Protein Accessions	# Missed Cleavages	Theo. MH+ [Da]	Area: F2: Sample	XCorr Sequest HT	Confidence Sequest HT	Percolator q-Value Sequest HT	Percolator PEP Sequest HT
	High	LTFTKDAVLVTK		0,0013785	0	1	7	3	unk	1	1335,78823	4.16126e+07	3,51	High	0	0,01462
	High	LNNLLESPLEELKSVVLIVR		0,000660872	0	1	8	1	unk	1	2278,33806		3,27	High	0	0,009162
	High	SIPNLDPSKVK		0,00841122	0	1	6	3	unk	1	1197,68376	116610401	2,47	High	0	0,05537
	High	GVTLPKGDTTVVVK		0,00477536	0	1	6	3	unk	1	1413,83116	8.79754e+07	2,47	High	0	0,0601
	High	VQLISEKTFK		0,094476	0	1	6	1	unk	1	1192,69360	5.07871e+07	2,15	High	0	0,2098
High	unk	len=1272	>gnl|unk|Mii73416_c1_g1_i3_3 len=1272	0,000	7,374	15,839243498818	5	11	5	1	423	46,4	8,62	8.51243e+07	0,487	23,23	5
	Confidence	Sequence	Modifications	Qvality PEP	Qvality q-value	# Protein Groups	# Proteins	# PSMs	Master Protein Accessions	# Missed Cleavages	Theo. MH+ [Da]	Area: F2: Sample	XCorr Sequest HT	Confidence Sequest HT	Percolator q-Value Sequest HT	Percolator PEP Sequest HT
	High	LTFTKDAVLVTK		0,0013785	0	1	7	3	unk	1	1335,78823	4.16126e+07	3,51	High	0	0,01462
	High	LNNLLESPLEELKSVVLIVR		0,000660872	0	1	8	1	unk	1	2278,33806		3,27	High	0	0,009162
	High	SIPNLDPSKVK		0,00841122	0	1	6	3	unk	1	1197,68376	116610401	2,47	High	0	0,05537
	High	GVTLPKGDTTVVVK		0,00477536	0	1	6	3	unk	1	1413,83116	8.79754e+07	2,47	High	0	0,0601
	High	VQLISEKTFK		0,094476	0	1	6	1	unk	1	1192,69360	5.07871e+07	2,15	High	0	0,2098
High	unk	len=764	>gnl|unk|Mii20712_c0_g1_i1_5 len=764	0,000	6,203	15,748031496063	3	6	3	1	254	29,3	8,98	4.75722e+07	0,848	15,54	3
	Confidence	Sequence	Modifications	Qvality PEP	Qvality q-value	# Protein Groups	# Proteins	# PSMs	Master Protein Accessions	# Missed Cleavages	Theo. MH+ [Da]	Area: F2: Sample	XCorr Sequest HT	Confidence Sequest HT	Percolator q-Value Sequest HT	Percolator PEP Sequest HT
	High	SFVVNDLIPLAK		0,135448	0	1	3	1	unk	0	1315,76201	5.42796e+07	1,66	High	0	0,2587
	High	AIKEECALFGQCPHKDR	2xCarbamidomethyl [C6; C12]	0,00279206	0	1	3	3	unk	2	2058,98479	5.42229e+07	3,41	High	0	0,02301
	High	KLCQHFLEGVK	1xCarbamidomethyl [C3]	0,000202331	0	1	3	2	unk	1	1358,72492	34214151	3,96	High	0	0,004304
High	unk	len=763	>gnl|unk|Mii20712_c0_g2_i1_5 len=763	0,000	6,203	15,748031496063	3	6	3	1	254	29,5	9,04	4.75722e+07	1,031	15,54	3
	Confidence	Sequence	Modifications	Qvality PEP	Qvality q-value	# Protein Groups	# Proteins	# PSMs	Master Protein Accessions	# Missed Cleavages	Theo. MH+ [Da]	Area: F2: Sample	XCorr Sequest HT	Confidence Sequest HT	Percolator q-Value Sequest HT	Percolator PEP Sequest HT
	High	SFVVNDLIPLAK		0,135448	0	1	3	1	unk	0	1315,76201	5.42796e+07	1,66	High	0	0,2587
	High	AIKEECALFGQCPHKDR	2xCarbamidomethyl [C6; C12]	0,00279206	0	1	3	3	unk	2	2058,98479	5.42229e+07	3,41	High	0	0,02301
	High	KLCQHFLEGVK	1xCarbamidomethyl [C3]	0,000202331	0	1	3	2	unk	1	1358,72492	34214151	3,96	High	0	0,004304
High	unk	len=248	>gnl|unk|Mii33875_c0_g1_i1_2 len=248	0,000	5,615	34	2	5	2	1	82	9,4	8,09	4.42185e+07	2,162	13,88	2
	Confidence	Sequence	Modifications	Qvality PEP	Qvality q-value	# Protein Groups	# Proteins	# PSMs	Master Protein Accessions	# Missed Cleavages	Theo. MH+ [Da]	Area: F2: Sample	XCorr Sequest HT	Confidence Sequest HT	Percolator q-Value Sequest HT	Percolator PEP Sequest HT
	High	AIKEECALFGQCPHKDR	2xCarbamidomethyl [C6; C12]	0,00279206	0	1	3	3	unk	2	2058,98479	5.42229e+07	3,41	High	0	0,02301
	High	KLCQHFLEGVK	1xCarbamidomethyl [C3]	0,000202331	0	1	3	2	unk	1	1358,72492	34214151	3,96	High	0	0,004304
High	unk	len=1000	>gnl|unk|Mii73416_c1_g1_i6_3 len=1000	0,000	5,539	16	4	8	4	1	333	36,6	6,81	8.51243e+07	0,492	16,99	4
	Confidence	Sequence	Modifications	Qvality PEP	Qvality q-value	# Protein Groups	# Proteins	# PSMs	Master Protein Accessions	# Missed Cleavages	Theo. MH+ [Da]	Area: F2: Sample	XCorr Sequest HT	Confidence Sequest HT	Percolator q-Value Sequest HT	Percolator PEP Sequest HT
	High	LNNLLESPLEELKSVVLIVR		0,000660872	0	1	8	1	unk	1	2278,33806		3,27	High	0	0,009162
	High	SIPNLDPSKVK		0,00841122	0	1	6	3	unk	1	1197,68376	116610401	2,47	High	0	0,05537
	High	GVTLPKGDTTVVVK		0,00477536	0	1	6	3	unk	1	1413,83116	8.79754e+07	2,47	High	0	0,0601
	High	VQLISEKTFK		0,094476	0	1	6	1	unk	1	1192,69360	5.07871e+07	2,15	High	0	0,2098
High	unk	len=1085	>gnl|unk|Mii78791_c0_g1_i4_1 len=1085	0,000	5,417	18	4	4	4	1	362	40,4	6,44	3.54431e+07	0,624	6,95	4
	Confidence	Sequence	Modifications	Qvality PEP	Qvality q-value	# Protein Groups	# Proteins	# PSMs	Master Protein Accessions	# Missed Cleavages	Theo. MH+ [Da]	Area: F2: Sample	XCorr Sequest HT	Confidence Sequest HT	Percolator q-Value Sequest HT	Percolator PEP Sequest HT
	High	YDQAKEYCEGMGMSLAK	1xCarbamidomethyl [C8]	0,000181204	0	1	5	1	unk	1	1980,85000	3.76668e+07	3,06	High	0	0,004013
	High	VYNNLHNTWLSK		0,0132684	0	1	8	1	unk	0	1488,75939	1.92414e+07	1,66	High	0	0,06217
	High	SADCNYKLTSGSVVLNDLPTGDKCGR	2xCarbamidomethyl [C4; C24]	0,0342533	0	1	9	1	unk	2	2827,33492	2.07086e+07	1,39	High	0	0,1133
	High	YWIGANDRGQEGK		0,0456273	0	1	8	1	unk	1	1493,71317	47953787	2,23	High	0	0,1355
High	unk	len=905	>gnl|unk|Mii73416_c0_g1_i2_6 len=905	0,000	5,336	15	4	10	4	1	301	33,1	8,54	8.51243e+07	0,492	19,95	4
	Confidence	Sequence	Modifications	Qvality PEP	Qvality q-value	# Protein Groups	# Proteins	# PSMs	Master Protein Accessions	# Missed Cleavages	Theo. MH+ [Da]	Area: F2: Sample	XCorr Sequest HT	Confidence Sequest HT	Percolator q-Value Sequest HT	Percolator PEP Sequest HT
	High	LTFTKDAVLVTK		0,0013785	0	1	7	3	unk	1	1335,78823	4.16126e+07	3,51	High	0	0,01462
	High	SIPNLDPSKVK		0,00841122	0	1	6	3	unk	1	1197,68376	116610401	2,47	High	0	0,05537
	High	GVTLPKGDTTVVVK		0,00477536	0	1	6	3	unk	1	1413,83116	8.79754e+07	2,47	High	0	0,0601
	High	VQLISEKTFK		0,094476	0	1	6	1	unk	1	1192,69360	5.07871e+07	2,15	High	0	0,2098
High	unk	len=833	>gnl|unk|Mii73416_c0_g1_i1_6 len=833	0,000	5,336	16	4	10	4	1	277	30,5	8,90	8.51243e+07	0,551	19,95	4
	Confidence	Sequence	Modifications	Qvality PEP	Qvality q-value	# Protein Groups	# Proteins	# PSMs	Master Protein Accessions	# Missed Cleavages	Theo. MH+ [Da]	Area: F2: Sample	XCorr Sequest HT	Confidence Sequest HT	Percolator q-Value Sequest HT	Percolator PEP Sequest HT
	High	LTFTKDAVLVTK		0,0013785	0	1	7	3	unk	1	1335,78823	4.16126e+07	3,51	High	0	0,01462
	High	SIPNLDPSKVK		0,00841122	0	1	6	3	unk	1	1197,68376	116610401	2,47	High	0	0,05537
	High	GVTLPKGDTTVVVK		0,00477536	0	1	6	3	unk	1	1413,83116	8.79754e+07	2,47	High	0	0,0601
	High	VQLISEKTFK		0,094476	0	1	6	1	unk	1	1192,69360	5.07871e+07	2,15	High	0	0,2098
High	unk	len=242	>gnl|unk|Mii68875_c0_g3_i1_6 len=242	0,000	5,289	40	3	5	0	0	81	9,0	6,79	2.55823e+07	0,931	13,49	3
	Confidence	Sequence	Modifications	Qvality PEP	Qvality q-value	# Protein Groups	# Proteins	# PSMs	Master Protein Accessions	# Missed Cleavages	Theo. MH+ [Da]	Area: F2: Sample	XCorr Sequest HT	Confidence Sequest HT	Percolator q-Value Sequest HT	Percolator PEP Sequest HT
	High	AGFAGDDAPR		0,0145991	0	1	21	2	unk	0	976,44828	2.13089e+07	2,12	High	0	0,06612
	High	HQGVMVGMGQK		0,0376886	0	1	26	2	unk	0	1171,57106	2.98557e+07	2,74	High	0	0,1206
	High	HQGVMVGMGQKDAYVGDEAQSKR	1xOxidation [M8]	1,03784E-05	0	0	3	1		2	2507,17657	6.46375e+07	4,52	High	0	0,0006447
High	unk	len=366	>gnl|unk|Mii68875_c0_g5_i1_6 len=366	0,000	5,289	27	3	5	0	0	122	13,3	4,91	2.55823e+07	0,778	13,49	3
	Confidence	Sequence	Modifications	Qvality PEP	Qvality q-value	# Protein Groups	# Proteins	# PSMs	Master Protein Accessions	# Missed Cleavages	Theo. MH+ [Da]	Area: F2: Sample	XCorr Sequest HT	Confidence Sequest HT	Percolator q-Value Sequest HT	Percolator PEP Sequest HT
	High	AGFAGDDAPR		0,0145991	0	1	21	2	unk	0	976,44828	2.13089e+07	2,12	High	0	0,06612
	High	HQGVMVGMGQK		0,0376886	0	1	26	2	unk	0	1171,57106	2.98557e+07	2,74	High	0	0,1206
	High	HQGVMVGMGQKDAYVGDEAQSKR	1xOxidation [M8]	1,03784E-05	0	0	3	1		2	2507,17657	6.46375e+07	4,52	High	0	0,0006447
High	unk	len=446	>gnl|unk|Mii63442_c0_g1_i1_4 len=446	0,000	4,830	13	2	4	2	1	148	16,8	8,28	6.16443e+07	1,154	13,07	2
	Confidence	Sequence	Modifications	Qvality PEP	Qvality q-value	# Protein Groups	# Proteins	# PSMs	Master Protein Accessions	# Missed Cleavages	Theo. MH+ [Da]	Area: F2: Sample	XCorr Sequest HT	Confidence Sequest HT	Percolator q-Value Sequest HT	Percolator PEP Sequest HT
	High	EIAATEPDIYGTCTGTCPK	2xCarbamidomethyl [C13; C17]	1,91598E-07	0	1	1	3	unk	0	2083,93108	6.16443e+07	4,14	High	0	0,0003502
	High	KEIAATEPDIYGTCTGTCPK	2xCarbamidomethyl [C14; C18]	0,170119	0	1	1	1	unk	1	2212,02605		2,15	High	0	0,2939
High	unk	len=1027	>gnl|unk|Mii74023_c2_g1_i3_5 len=1027	0,000	4,602	10	2	3	1	1	342	38,3	6,52	1.65734e+07	0,212	8,40	2
	Confidence	Sequence	Modifications	Qvality PEP	Qvality q-value	# Protein Groups	# Proteins	# PSMs	Master Protein Accessions	# Missed Cleavages	Theo. MH+ [Da]	Area: F2: Sample	XCorr Sequest HT	Confidence Sequest HT	Percolator q-Value Sequest HT	Percolator PEP Sequest HT
	High	VLVSDGPDAPFSQCGQGPAK	1xCarbamidomethyl [C14]	0,0014513	0	1	5	1	unk	0	2029,96477	1.65734e+07	2,13	High	0	0,01514
	High	SCEESGHADCVLPFEYR	2xCarbamidomethyl [C2; C10]	4,51555E-05	0	2	3	2	unk; unk	0	2055,85350	34024290	3,19	High	0	0,00165
High	unk	len=801	>gnl|unk|Mii51784_c0_g1_i1_3 len=801	0,000	4,323	12,781954887218	2	6	2	1	266	29,9	5,26	1.42741e+08	0,359	15,54	2
	Confidence	Sequence	Modifications	Qvality PEP	Qvality q-value	# Protein Groups	# Proteins	# PSMs	Master Protein Accessions	# Missed Cleavages	Theo. MH+ [Da]	Area: F2: Sample	XCorr Sequest HT	Confidence Sequest HT	Percolator q-Value Sequest HT	Percolator PEP Sequest HT
	High	VAPEEHPVLLTEAPLNPK		6,02362E-06	0	1	11	5	unk	0	1954,06440	213099959	3,91	High	0	0,001196
	High	SYELPDGQVITIGNER		0,0302289	0	1	31	1	unk	0	1790,89192	7.23827e+07	1,10	High	0	0,1047
High	unk	len=469	>gnl|unk|Mii61349_c0_g1_i1_2 len=469	0,000	4,233	8	1	3	1	1	156	17,7	9,61	6.24442e+07	0,468	8,42	1
	Confidence	Sequence	Modifications	Qvality PEP	Qvality q-value	# Protein Groups	# Proteins	# PSMs	Master Protein Accessions	# Missed Cleavages	Theo. MH+ [Da]	Area: F2: Sample	XCorr Sequest HT	Confidence Sequest HT	Percolator q-Value Sequest HT	Percolator PEP Sequest HT
	High	GSSNLLNKEVLYK		0,000412831	0	1	3	3	unk	1	1464,80567	6.24442e+07	3,06	High	0	0,006781
High	unk	len=1404	>gnl|unk|Mii69666_c0_g1_i1_5 len=1404	0,000	4,233	2	1	3	1	1	467	53,9	9,73	6.24442e+07	0,141	8,42	1
	Confidence	Sequence	Modifications	Qvality PEP	Qvality q-value	# Protein Groups	# Proteins	# PSMs	Master Protein Accessions	# Missed Cleavages	Theo. MH+ [Da]	Area: F2: Sample	XCorr Sequest HT	Confidence Sequest HT	Percolator q-Value Sequest HT	Percolator PEP Sequest HT
	High	GSSNLLNKEVLYK		0,000412831	0	1	3	3	unk	1	1464,80567	6.24442e+07	3,06	High	0	0,006781
High	unk	len=1025	>gnl|unk|Mii61349_c0_g1_i2_2 len=1025	0,000	4,233	3	1	3	1	1	341	38,8	10,05	6.24442e+07	0,212	8,42	1
	Confidence	Sequence	Modifications	Qvality PEP	Qvality q-value	# Protein Groups	# Proteins	# PSMs	Master Protein Accessions	# Missed Cleavages	Theo. MH+ [Da]	Area: F2: Sample	XCorr Sequest HT	Confidence Sequest HT	Percolator q-Value Sequest HT	Percolator PEP Sequest HT
	High	GSSNLLNKEVLYK		0,000412831	0	1	3	3	unk	1	1464,80567	6.24442e+07	3,06	High	0	0,006781
High	unk	len=224	>gnl|unk|Mii68875_c0_g4_i1_6 len=224	0,000	4,109	30	2	3	0	0	75	8,5	6,28	2.98557e+07	0,389	9,42	2
	Confidence	Sequence	Modifications	Qvality PEP	Qvality q-value	# Protein Groups	# Proteins	# PSMs	Master Protein Accessions	# Missed Cleavages	Theo. MH+ [Da]	Area: F2: Sample	XCorr Sequest HT	Confidence Sequest HT	Percolator q-Value Sequest HT	Percolator PEP Sequest HT
	High	HQGVMVGMGQK		0,0376886	0	1	26	2	unk	0	1171,57106	2.98557e+07	2,74	High	0	0,1206
	High	HQGVMVGMGQKDAYVGDEAQSKR	1xOxidation [M8]	1,03784E-05	0	0	3	1		2	2507,17657	6.46375e+07	4,52	High	0	0,0006447
High	unk	len=729	>gnl|unk|Mii74023_c2_g1_i2_4 len=729	0,000	3,978	13	2	3	1	1	243	27,1	5,35	4.22354e+07	0,334	6,27	2
	Confidence	Sequence	Modifications	Qvality PEP	Qvality q-value	# Protein Groups	# Proteins	# PSMs	Master Protein Accessions	# Missed Cleavages	Theo. MH+ [Da]	Area: F2: Sample	XCorr Sequest HT	Confidence Sequest HT	Percolator q-Value Sequest HT	Percolator PEP Sequest HT
	High	SCEESGHADCVLPFEYR	2xCarbamidomethyl [C2; C10]	4,51555E-05	0	2	3	2	unk; unk	0	2055,85350	34024290	3,19	High	0	0,00165
	High	SNKPWCSLDSEYQGR	1xCarbamidomethyl [C6]	0,0137652	0	1	2	1	unk	0	1826,81262	4.22354e+07	1,85	High	0	0,06377
High	unk	len=465	>gnl|unk|Mii74023_c4_g2_i7_3 len=465	0,000	3,905	12,987012987013	1	4	1	1	154	16,4	8,19	1.0058e+08	0,233	11,81	1
	Confidence	Sequence	Modifications	Qvality PEP	Qvality q-value	# Protein Groups	# Proteins	# PSMs	Master Protein Accessions	# Missed Cleavages	Theo. MH+ [Da]	Area: F2: Sample	XCorr Sequest HT	Confidence Sequest HT	Percolator q-Value Sequest HT	Percolator PEP Sequest HT
	High	AVDGNTNQNYPGNSCTHTAK	1xCarbamidomethyl [C15]	7,91806E-07	0	1	7	4	unk	0	2148,93632	1.0058e+08	5,05	High	0	0,0002987
High	unk	len=374	>gnl|unk|Mii69942_c3_g1_i6_4 len=374	0,000	3,905	16	1	4	1	1	124	13,1	8,27	1.0058e+08	0,259	11,81	1
	Confidence	Sequence	Modifications	Qvality PEP	Qvality q-value	# Protein Groups	# Proteins	# PSMs	Master Protein Accessions	# Missed Cleavages	Theo. MH+ [Da]	Area: F2: Sample	XCorr Sequest HT	Confidence Sequest HT	Percolator q-Value Sequest HT	Percolator PEP Sequest HT
	High	AVDGNTNQNYPGNSCTHTAK	1xCarbamidomethyl [C15]	7,91806E-07	0	1	7	4	unk	0	2148,93632	1.0058e+08	5,05	High	0	0,0002987
High	unk	len=478	>gnl|unk|Mii74023_c4_g2_i3_1 len=478	0,000	3,905	12	1	4	1	1	159	16,9	8,40	1.0058e+08	0,259	11,81	1
	Confidence	Sequence	Modifications	Qvality PEP	Qvality q-value	# Protein Groups	# Proteins	# PSMs	Master Protein Accessions	# Missed Cleavages	Theo. MH+ [Da]	Area: F2: Sample	XCorr Sequest HT	Confidence Sequest HT	Percolator q-Value Sequest HT	Percolator PEP Sequest HT
	High	AVDGNTNQNYPGNSCTHTAK	1xCarbamidomethyl [C15]	7,91806E-07	0	1	7	4	unk	0	2148,93632	1.0058e+08	5,05	High	0	0,0002987
High	unk	len=475	>gnl|unk|Mii74023_c4_g2_i6_1 len=475	0,000	3,905	12	1	4	1	1	158	16,9	8,57	1.0058e+08	0,194	11,81	1
	Confidence	Sequence	Modifications	Qvality PEP	Qvality q-value	# Protein Groups	# Proteins	# PSMs	Master Protein Accessions	# Missed Cleavages	Theo. MH+ [Da]	Area: F2: Sample	XCorr Sequest HT	Confidence Sequest HT	Percolator q-Value Sequest HT	Percolator PEP Sequest HT
	High	AVDGNTNQNYPGNSCTHTAK	1xCarbamidomethyl [C15]	7,91806E-07	0	1	7	4	unk	0	2148,93632	1.0058e+08	5,05	High	0	0,0002987
High	unk	len=475	>gnl|unk|Mii74023_c4_g2_i1_1 len=475	0,000	3,905	12	1	4	1	1	158	16,8	8,18	1.0058e+08	0,212	11,81	1
	Confidence	Sequence	Modifications	Qvality PEP	Qvality q-value	# Protein Groups	# Proteins	# PSMs	Master Protein Accessions	# Missed Cleavages	Theo. MH+ [Da]	Area: F2: Sample	XCorr Sequest HT	Confidence Sequest HT	Percolator q-Value Sequest HT	Percolator PEP Sequest HT
	High	AVDGNTNQNYPGNSCTHTAK	1xCarbamidomethyl [C15]	7,91806E-07	0	1	7	4	unk	0	2148,93632	1.0058e+08	5,05	High	0	0,0002987
High	unk	len=342	>gnl|unk|Mii69942_c3_g1_i5_4 len=342	0,000	3,905	17	1	4	1	1	114	12,0	8,48	1.0058e+08	0,292	11,81	1
	Confidence	Sequence	Modifications	Qvality PEP	Qvality q-value	# Protein Groups	# Proteins	# PSMs	Master Protein Accessions	# Missed Cleavages	Theo. MH+ [Da]	Area: F2: Sample	XCorr Sequest HT	Confidence Sequest HT	Percolator q-Value Sequest HT	Percolator PEP Sequest HT
	High	AVDGNTNQNYPGNSCTHTAK	1xCarbamidomethyl [C15]	7,91806E-07	0	1	7	4	unk	0	2148,93632	1.0058e+08	5,05	High	0	0,0002987
High	unk	len=374	>gnl|unk|Mii69942_c3_g1_i4_4 len=374	0,000	3,905	16	1	4	1	1	124	13,0	8,27	1.0058e+08	0,292	11,81	1
	Confidence	Sequence	Modifications	Qvality PEP	Qvality q-value	# Protein Groups	# Proteins	# PSMs	Master Protein Accessions	# Missed Cleavages	Theo. MH+ [Da]	Area: F2: Sample	XCorr Sequest HT	Confidence Sequest HT	Percolator q-Value Sequest HT	Percolator PEP Sequest HT
	High	AVDGNTNQNYPGNSCTHTAK	1xCarbamidomethyl [C15]	7,91806E-07	0	1	7	4	unk	0	2148,93632	1.0058e+08	5,05	High	0	0,0002987
High	unk	len=432	>gnl|unk|Mii73416_c0_g2_i1_5 len=432	0,000	3,873	22	2	4	2	1	143	15,2	9,57	4.16126e+07	0,585	9,51	2
	Confidence	Sequence	Modifications	Qvality PEP	Qvality q-value	# Protein Groups	# Proteins	# PSMs	Master Protein Accessions	# Missed Cleavages	Theo. MH+ [Da]	Area: F2: Sample	XCorr Sequest HT	Confidence Sequest HT	Percolator q-Value Sequest HT	Percolator PEP Sequest HT
	High	LTFTKDAVLVTK		0,0013785	0	1	7	3	unk	1	1335,78823	4.16126e+07	3,51	High	0	0,01462
	High	LNNLLESPLEELKSVVLIVR		0,000660872	0	1	8	1	unk	1	2278,33806		3,27	High	0	0,009162
High	unk	len=396	>gnl|unk|Mii73416_c0_g2_i2_5 len=396	0,000	3,873	24	2	4	2	1	131	14,1	9,04	4.16126e+07	0,778	9,51	2
	Confidence	Sequence	Modifications	Qvality PEP	Qvality q-value	# Protein Groups	# Proteins	# PSMs	Master Protein Accessions	# Missed Cleavages	Theo. MH+ [Da]	Area: F2: Sample	XCorr Sequest HT	Confidence Sequest HT	Percolator q-Value Sequest HT	Percolator PEP Sequest HT
	High	LTFTKDAVLVTK		0,0013785	0	1	7	3	unk	1	1335,78823	4.16126e+07	3,51	High	0	0,01462
	High	LNNLLESPLEELKSVVLIVR		0,000660872	0	1	8	1	unk	1	2278,33806		3,27	High	0	0,009162
High	unk	len=348	>gnl|unk|Mii46547_c0_g1_i1_3 len=348	0,000	3,858	27	3	8	3	1	115	12,5	6,52	1.03226e+08	1,683	19,22	3
	Confidence	Sequence	Modifications	Qvality PEP	Qvality q-value	# Protein Groups	# Proteins	# PSMs	Master Protein Accessions	# Missed Cleavages	Theo. MH+ [Da]	Area: F2: Sample	XCorr Sequest HT	Confidence Sequest HT	Percolator q-Value Sequest HT	Percolator PEP Sequest HT
	High	AVFPSIVGRPR		0,00180944	0	1	19	4	unk	0	1198,70550	2.58513e+08	2,73	High	0	0,03185
	High	AGFAGDDAPR		0,0145991	0	1	21	2	unk	0	976,44828	2.13089e+07	2,12	High	0	0,06612
	High	HQGVMVGMGQK		0,0376886	0	1	26	2	unk	0	1171,57106	2.98557e+07	2,74	High	0	0,1206
High	unk	len=466	>gnl|unk|Mii74023_c1_g1_i3_3 len=466	0,000	3,545	12,987012987013	1	2	1	1	154	16,8	8,12	2.01414e+07	0,233	6,08	1
	Confidence	Sequence	Modifications	Qvality PEP	Qvality q-value	# Protein Groups	# Proteins	# PSMs	Master Protein Accessions	# Missed Cleavages	Theo. MH+ [Da]	Area: F2: Sample	XCorr Sequest HT	Confidence Sequest HT	Percolator q-Value Sequest HT	Percolator PEP Sequest HT
	High	VLVSDGPDAPFTQCGQGPAK	1xCarbamidomethyl [C14]	2,88781E-06	0	1	1	2	unk	0	2043,98042	2.01414e+07	3,45	High	0	0,0002851
High	unk	len=478	>gnl|unk|Mii7682_c0_g1_i1_4 len=478	0,000	3,342	11	1	5	1	1	159	18,2	5,96	213099959	0,292	15,54	1
	Confidence	Sequence	Modifications	Qvality PEP	Qvality q-value	# Protein Groups	# Proteins	# PSMs	Master Protein Accessions	# Missed Cleavages	Theo. MH+ [Da]	Area: F2: Sample	XCorr Sequest HT	Confidence Sequest HT	Percolator q-Value Sequest HT	Percolator PEP Sequest HT
	High	VAPEEHPVLLTEAPLNPK		6,02362E-06	0	1	11	5	unk	0	1954,06440	213099959	3,91	High	0	0,001196
High	unk	len=1542	>gnl|unk|Mii72538_c2_g2_i2_2 len=1542	0,000	3,339	5,0682261208577	2	2	2	1	513	57,5	5,35	10565744	0,186	5,17	2
	Confidence	Sequence	Modifications	Qvality PEP	Qvality q-value	# Protein Groups	# Proteins	# PSMs	Master Protein Accessions	# Missed Cleavages	Theo. MH+ [Da]	Area: F2: Sample	XCorr Sequest HT	Confidence Sequest HT	Percolator q-Value Sequest HT	Percolator PEP Sequest HT
	High	LDHKFDLMYAK		0,060333	0	1	32	1	unk	1	1380,69803	1.34003e+07	2,21	High	0	0,1609
	High	AVFVDLEPTVVDEVR		0,000105947	0	1	9	1	unk	0	1687,89013	7.73116e+06	2,96	High	0	0,002846
High	unk	len=1550	>gnl|unk|Mii72538_c2_g2_i4_1 len=1550	0,000	3,339	5	2	2	2	1	516	57,8	5,34	10565744	0,186	5,17	2
	Confidence	Sequence	Modifications	Qvality PEP	Qvality q-value	# Protein Groups	# Proteins	# PSMs	Master Protein Accessions	# Missed Cleavages	Theo. MH+ [Da]	Area: F2: Sample	XCorr Sequest HT	Confidence Sequest HT	Percolator q-Value Sequest HT	Percolator PEP Sequest HT
	High	LDHKFDLMYAK		0,060333	0	1	32	1	unk	1	1380,69803	1.34003e+07	2,21	High	0	0,1609
	High	AVFVDLEPTVVDEVR		0,000105947	0	1	9	1	unk	0	1687,89013	7.73116e+06	2,96	High	0	0,002846
High	unk	len=1442	>gnl|unk|Mii72538_c2_g2_i1_2 len=1442	0,000	3,339	5	2	2	2	1	480	53,3	5,26	10565744	0,186	5,17	2
	Confidence	Sequence	Modifications	Qvality PEP	Qvality q-value	# Protein Groups	# Proteins	# PSMs	Master Protein Accessions	# Missed Cleavages	Theo. MH+ [Da]	Area: F2: Sample	XCorr Sequest HT	Confidence Sequest HT	Percolator q-Value Sequest HT	Percolator PEP Sequest HT
	High	LDHKFDLMYAK		0,060333	0	1	32	1	unk	1	1380,69803	1.34003e+07	2,21	High	0	0,1609
	High	AVFVDLEPTVVDEVR		0,000105947	0	1	9	1	unk	0	1687,89013	7.73116e+06	2,96	High	0	0,002846
High	unk	len=967	>gnl|unk|Mii3789_c0_g1_i1_6 len=967	0,000	3,167	9	2	4	2	1	321	37,1	7,81	8.3837e+07	0,585	2,25	2
	Confidence	Sequence	Modifications	Qvality PEP	Qvality q-value	# Protein Groups	# Proteins	# PSMs	Master Protein Accessions	# Missed Cleavages	Theo. MH+ [Da]	Area: F2: Sample	XCorr Sequest HT	Confidence Sequest HT	Percolator q-Value Sequest HT	Percolator PEP Sequest HT
	High	SYELPDGQVITIGNER		0,0302289	0	1	31	1	unk	0	1790,89192	7.23827e+07	1,10	High	0	0,1047
	High	MQKEISALAPSTMK		0,0167877	0	1	7	3	unk	1	1534,79676	9.52914e+07	2,25	High	0	0,09009
High	unk	len=617	>gnl|unk|Mii3798_c0_g3_i1_2 len=617	0,000	3,167	14	2	4	2	1	205	23,3	5,41	8.3837e+07	0,995	2,25	2
	Confidence	Sequence	Modifications	Qvality PEP	Qvality q-value	# Protein Groups	# Proteins	# PSMs	Master Protein Accessions	# Missed Cleavages	Theo. MH+ [Da]	Area: F2: Sample	XCorr Sequest HT	Confidence Sequest HT	Percolator q-Value Sequest HT	Percolator PEP Sequest HT
	High	SYELPDGQVITIGNER		0,0302289	0	1	31	1	unk	0	1790,89192	7.23827e+07	1,10	High	0	0,1047
	High	MQKEISALAPSTMK		0,0167877	0	1	7	3	unk	1	1534,79676	9.52914e+07	2,25	High	0	0,09009
High	unk	len=693	>gnl|unk|Mii37321_c0_g1_i1_5 len=693	0,000	3,082	7	1	2	1	1	230	25,4	7,30	3.54483e+07	0,212	4,80	1
	Confidence	Sequence	Modifications	Qvality PEP	Qvality q-value	# Protein Groups	# Proteins	# PSMs	Master Protein Accessions	# Missed Cleavages	Theo. MH+ [Da]	Area: F2: Sample	XCorr Sequest HT	Confidence Sequest HT	Percolator q-Value Sequest HT	Percolator PEP Sequest HT
	High	ALIGGATAEGEPLYVAR		1,53234E-05	0	1	4	2	unk	0	1687,90136	3.54483e+07	2,88	High	0	0,0008278
High	unk	len=625	>gnl|unk|Mii62904_c0_g1_i5_3 len=625	0,000	3,082	8	1	2	1	1	207	22,8	6,98	3.54483e+07	0,233	4,80	1
	Confidence	Sequence	Modifications	Qvality PEP	Qvality q-value	# Protein Groups	# Proteins	# PSMs	Master Protein Accessions	# Missed Cleavages	Theo. MH+ [Da]	Area: F2: Sample	XCorr Sequest HT	Confidence Sequest HT	Percolator q-Value Sequest HT	Percolator PEP Sequest HT
	High	ALIGGATAEGEPLYVAR		1,53234E-05	0	1	4	2	unk	0	1687,90136	3.54483e+07	2,88	High	0	0,0008278
High	unk	len=580	>gnl|unk|Mii62904_c0_g1_i3_3 len=580	0,000	3,082	8	1	2	1	1	192	20,9	7,11	3.54483e+07	0,212	4,80	1
	Confidence	Sequence	Modifications	Qvality PEP	Qvality q-value	# Protein Groups	# Proteins	# PSMs	Master Protein Accessions	# Missed Cleavages	Theo. MH+ [Da]	Area: F2: Sample	XCorr Sequest HT	Confidence Sequest HT	Percolator q-Value Sequest HT	Percolator PEP Sequest HT
	High	ALIGGATAEGEPLYVAR		1,53234E-05	0	1	4	2	unk	0	1687,90136	3.54483e+07	2,88	High	0	0,0008278
High	unk	len=612	>gnl|unk|Mii62904_c0_g1_i4_3 len=612	0,000	3,082	8,3743842364532	1	2	1	1	203	22,5	7,18	3.54483e+07	0,233	4,80	1
	Confidence	Sequence	Modifications	Qvality PEP	Qvality q-value	# Protein Groups	# Proteins	# PSMs	Master Protein Accessions	# Missed Cleavages	Theo. MH+ [Da]	Area: F2: Sample	XCorr Sequest HT	Confidence Sequest HT	Percolator q-Value Sequest HT	Percolator PEP Sequest HT
	High	ALIGGATAEGEPLYVAR		1,53234E-05	0	1	4	2	unk	0	1687,90136	3.54483e+07	2,88	High	0	0,0008278
High	unk	len=341	>gnl|unk|Mii46547_c0_g1_i2_3 len=341	0,000	2,939	18	2	6	2	1	113	12,3	8,03	1.39911e+08	0,931	14,32	2
	Confidence	Sequence	Modifications	Qvality PEP	Qvality q-value	# Protein Groups	# Proteins	# PSMs	Master Protein Accessions	# Missed Cleavages	Theo. MH+ [Da]	Area: F2: Sample	XCorr Sequest HT	Confidence Sequest HT	Percolator q-Value Sequest HT	Percolator PEP Sequest HT
	High	AVFPSIVGRPR		0,00180944	0	1	19	4	unk	0	1198,70550	2.58513e+08	2,73	High	0	0,03185
	High	AGFAGDDAPR		0,0145991	0	1	21	2	unk	0	976,44828	2.13089e+07	2,12	High	0	0,06612
High	unk	len=702	>gnl|unk|Mii74023_c2_g1_i4_4 len=702	0,000	2,783	7	1	2	0	2	234	26,1	5,17		0,179	6,27	1
	Confidence	Sequence	Modifications	Qvality PEP	Qvality q-value	# Protein Groups	# Proteins	# PSMs	Master Protein Accessions	# Missed Cleavages	Theo. MH+ [Da]	Area: F2: Sample	XCorr Sequest HT	Confidence Sequest HT	Percolator q-Value Sequest HT	Percolator PEP Sequest HT
	High	SCEESGHADCVLPFEYR	2xCarbamidomethyl [C2; C10]	4,51555E-05	0	2	3	2	unk; unk	0	2055,85350	34024290	3,19	High	0	0,00165
High	unk	len=687	>gnl|unk|Mii40648_c0_g1_i1_2 len=687	0,000	2,593	7	1	1	1	1	228	24,8	6,81	1.38933e+07	0,179	2,07	1
	Confidence	Sequence	Modifications	Qvality PEP	Qvality q-value	# Protein Groups	# Proteins	# PSMs	Master Protein Accessions	# Missed Cleavages	Theo. MH+ [Da]	Area: F2: Sample	XCorr Sequest HT	Confidence Sequest HT	Percolator q-Value Sequest HT	Percolator PEP Sequest HT
	High	FVGCGYSQCAGHSSQR	2xCarbamidomethyl [C4; C9]	8,94644E-05	0	1	3	1	unk	0	1800,75406	1.38933e+07	2,07	High	0	0,002551
High	unk	len=834	>gnl|unk|Mii40648_c0_g1_i2_2 len=834	0,000	2,593	5	1	1	1	1	277	29,7	6,04	1.38933e+07	0,145	2,07	1
	Confidence	Sequence	Modifications	Qvality PEP	Qvality q-value	# Protein Groups	# Proteins	# PSMs	Master Protein Accessions	# Missed Cleavages	Theo. MH+ [Da]	Area: F2: Sample	XCorr Sequest HT	Confidence Sequest HT	Percolator q-Value Sequest HT	Percolator PEP Sequest HT
	High	FVGCGYSQCAGHSSQR	2xCarbamidomethyl [C4; C9]	8,94644E-05	0	1	3	1	unk	0	1800,75406	1.38933e+07	2,07	High	0	0,002551
High	unk	len=1086	>gnl|unk|Mii39740_c0_g1_i1_6 len=1086	0,000	2,593	4	1	1	1	1	361	39,5	6,68	1.38933e+07	0,105	2,07	1
	Confidence	Sequence	Modifications	Qvality PEP	Qvality q-value	# Protein Groups	# Proteins	# PSMs	Master Protein Accessions	# Missed Cleavages	Theo. MH+ [Da]	Area: F2: Sample	XCorr Sequest HT	Confidence Sequest HT	Percolator q-Value Sequest HT	Percolator PEP Sequest HT
	High	FVGCGYSQCAGHSSQR	2xCarbamidomethyl [C4; C9]	8,94644E-05	0	1	3	1	unk	0	1800,75406	1.38933e+07	2,07	High	0	0,002551
High	unk	len=5341	>gnl|unk|Mii79253_c2_g1_i1_6 len=5341	0,000	2,569	1,6301292861158	2	3	2	1	1779	200,0	7,14	1.0284e+07	0,039	5,85	2
	Confidence	Sequence	Modifications	Qvality PEP	Qvality q-value	# Protein Groups	# Proteins	# PSMs	Master Protein Accessions	# Missed Cleavages	Theo. MH+ [Da]	Area: F2: Sample	XCorr Sequest HT	Confidence Sequest HT	Percolator q-Value Sequest HT	Percolator PEP Sequest HT
	High	HCGCQDDHGYYHPR	2xCarbamidomethyl [C2; C4]	0,00499072	0	1	1	1	unk	0	1801,69180	8.26457e+06	3,16	High	0	0,03325
	High	LHDGEMMDFDSEVKR		0,020175	0	1	2	2	unk	1	1808,79419	1.23034e+07	2,69	High	0	0,0811
High	unk	len=349	>gnl|unk|Mii72538_c2_g2_i5_1 len=349	0,000	2,546	12	1	1	1	1	116	13,0	5,47	7.73116e+06	0,778	2,96	1
	Confidence	Sequence	Modifications	Qvality PEP	Qvality q-value	# Protein Groups	# Proteins	# PSMs	Master Protein Accessions	# Missed Cleavages	Theo. MH+ [Da]	Area: F2: Sample	XCorr Sequest HT	Confidence Sequest HT	Percolator q-Value Sequest HT	Percolator PEP Sequest HT
	High	AVFVDLEPTVVDEVR		0,000105947	0	1	9	1	unk	0	1687,89013	7.73116e+06	2,96	High	0	0,002846
High	unk	len=272	>gnl|unk|Mii72254_c0_g1_i2_6 len=272	0,000	2,546	16	1	1	1	1	90	10,0	5,43	7.73116e+06	0,389	2,96	1
	Confidence	Sequence	Modifications	Qvality PEP	Qvality q-value	# Protein Groups	# Proteins	# PSMs	Master Protein Accessions	# Missed Cleavages	Theo. MH+ [Da]	Area: F2: Sample	XCorr Sequest HT	Confidence Sequest HT	Percolator q-Value Sequest HT	Percolator PEP Sequest HT
	High	AVFVDLEPTVVDEVR		0,000105947	0	1	9	1	unk	0	1687,89013	7.73116e+06	2,96	High	0	0,002846
High	unk	len=449	>gnl|unk|Mii72538_c2_g2_i6_1 len=449	0,000	2,546	10	1	1	1	1	149	16,6	6,01	7.73116e+06	0,334	2,96	1
	Confidence	Sequence	Modifications	Qvality PEP	Qvality q-value	# Protein Groups	# Proteins	# PSMs	Master Protein Accessions	# Missed Cleavages	Theo. MH+ [Da]	Area: F2: Sample	XCorr Sequest HT	Confidence Sequest HT	Percolator q-Value Sequest HT	Percolator PEP Sequest HT
	High	AVFVDLEPTVVDEVR		0,000105947	0	1	9	1	unk	0	1687,89013	7.73116e+06	2,96	High	0	0,002846
High	unk	len=662	>gnl|unk|Mii72538_c2_g2_i3_1 len=662	0,000	2,546	6	1	1	1	1	221	24,4	5,74	7.73116e+06	0,259	2,96	1
	Confidence	Sequence	Modifications	Qvality PEP	Qvality q-value	# Protein Groups	# Proteins	# PSMs	Master Protein Accessions	# Missed Cleavages	Theo. MH+ [Da]	Area: F2: Sample	XCorr Sequest HT	Confidence Sequest HT	Percolator q-Value Sequest HT	Percolator PEP Sequest HT
	High	AVFVDLEPTVVDEVR		0,000105947	0	1	9	1	unk	0	1687,89013	7.73116e+06	2,96	High	0	0,002846
High	unk	len=441	>gnl|unk|Mii72538_c2_g2_i7_2 len=441	0,000	2,546	10	1	1	1	1	146	16,3	6,09	7.73116e+06	0,334	2,96	1
	Confidence	Sequence	Modifications	Qvality PEP	Qvality q-value	# Protein Groups	# Proteins	# PSMs	Master Protein Accessions	# Missed Cleavages	Theo. MH+ [Da]	Area: F2: Sample	XCorr Sequest HT	Confidence Sequest HT	Percolator q-Value Sequest HT	Percolator PEP Sequest HT
	High	AVFVDLEPTVVDEVR		0,000105947	0	1	9	1	unk	0	1687,89013	7.73116e+06	2,96	High	0	0,002846
High	unk	len=1125	>gnl|unk|Mii72254_c0_g1_i1_4 len=1125	0,000	2,546	4	1	1	1	1	375	41,7	5,96	7.73116e+06	0,145	2,96	1
	Confidence	Sequence	Modifications	Qvality PEP	Qvality q-value	# Protein Groups	# Proteins	# PSMs	Master Protein Accessions	# Missed Cleavages	Theo. MH+ [Da]	Area: F2: Sample	XCorr Sequest HT	Confidence Sequest HT	Percolator q-Value Sequest HT	Percolator PEP Sequest HT
	High	AVFVDLEPTVVDEVR		0,000105947	0	1	9	1	unk	0	1687,89013	7.73116e+06	2,96	High	0	0,002846
High	unk	len=429	>gnl|unk|Mii56068_c0_g1_i1_1 len=429	0,000	2,365	13	1	2	1	1	143	16,2	8,31	1.89321e+07	0,468	6,76	1
	Confidence	Sequence	Modifications	Qvality PEP	Qvality q-value	# Protein Groups	# Proteins	# PSMs	Master Protein Accessions	# Missed Cleavages	Theo. MH+ [Da]	Area: F2: Sample	XCorr Sequest HT	Confidence Sequest HT	Percolator q-Value Sequest HT	Percolator PEP Sequest HT
	High	QIAATEPDIYGTCTGTCPK	2xCarbamidomethyl [C13; C17]	0,000203824	0	1	2	2	unk	0	2082,94707	1.89321e+07	3,62	High	0	0,004316
High	unk	len=446	>gnl|unk|Mii63442_c0_g1_i2_4 len=446	0,000	2,365	12	1	2	1	1	148	16,7	8,18	1.89321e+07	0,468	6,76	1
	Confidence	Sequence	Modifications	Qvality PEP	Qvality q-value	# Protein Groups	# Proteins	# PSMs	Master Protein Accessions	# Missed Cleavages	Theo. MH+ [Da]	Area: F2: Sample	XCorr Sequest HT	Confidence Sequest HT	Percolator q-Value Sequest HT	Percolator PEP Sequest HT
	High	QIAATEPDIYGTCTGTCPK	2xCarbamidomethyl [C13; C17]	0,000203824	0	1	2	2	unk	0	2082,94707	1.89321e+07	3,62	High	0	0,004316
High	unk	len=246	>gnl|unk|Mii56615_c0_g1_i3_2 len=246	0,000	2,187	17	1	3	1	1	82	9,1	8,15	9.52914e+07	1,154	2,25	1
	Confidence	Sequence	Modifications	Qvality PEP	Qvality q-value	# Protein Groups	# Proteins	# PSMs	Master Protein Accessions	# Missed Cleavages	Theo. MH+ [Da]	Area: F2: Sample	XCorr Sequest HT	Confidence Sequest HT	Percolator q-Value Sequest HT	Percolator PEP Sequest HT
	High	MQKEISALAPSTMK		0,0167877	0	1	7	3	unk	1	1534,79676	9.52914e+07	2,25	High	0	0,09009
High	unk	len=504	>gnl|unk|Mii3798_c0_g2_i1_3 len=504	0,000	2,187	8	1	3	1	1	167	19,1	8,06	9.52914e+07	0,668	2,25	1
	Confidence	Sequence	Modifications	Qvality PEP	Qvality q-value	# Protein Groups	# Proteins	# PSMs	Master Protein Accessions	# Missed Cleavages	Theo. MH+ [Da]	Area: F2: Sample	XCorr Sequest HT	Confidence Sequest HT	Percolator q-Value Sequest HT	Percolator PEP Sequest HT
	High	MQKEISALAPSTMK		0,0167877	0	1	7	3	unk	1	1534,79676	9.52914e+07	2,25	High	0	0,09009
High	unk	len=463	>gnl|unk|Mii3798_c0_g1_i1_1 len=463	0,000	2,187	9	1	3	1	1	154	17,7	7,83	9.52914e+07	0,668	2,25	1
	Confidence	Sequence	Modifications	Qvality PEP	Qvality q-value	# Protein Groups	# Proteins	# PSMs	Master Protein Accessions	# Missed Cleavages	Theo. MH+ [Da]	Area: F2: Sample	XCorr Sequest HT	Confidence Sequest HT	Percolator q-Value Sequest HT	Percolator PEP Sequest HT
	High	MQKEISALAPSTMK		0,0167877	0	1	7	3	unk	1	1534,79676	9.52914e+07	2,25	High	0	0,09009
High	unk	len=713	>gnl|unk|Mii68682_c0_g1_i2_2 len=713	0,000	2,140	5	1	1	1	1	237	27,1	8,40	9.63117e+06	0,155	2,59	1
	Confidence	Sequence	Modifications	Qvality PEP	Qvality q-value	# Protein Groups	# Proteins	# PSMs	Master Protein Accessions	# Missed Cleavages	Theo. MH+ [Da]	Area: F2: Sample	XCorr Sequest HT	Confidence Sequest HT	Percolator q-Value Sequest HT	Percolator PEP Sequest HT
	High	YASMTESSEICCR	2xCarbamidomethyl [C11; C12]	0,000457586	0	1	3	1	unk	0	1593,63419	9.63117e+06	2,59	High	0	0,00725
High	unk	len=320	>gnl|unk|Mii44253_c0_g4_i1_6 len=320	0,000	2,140	12	1	1	1	1	106	12,1	8,46	9.63117e+06	0,292	2,59	1
	Confidence	Sequence	Modifications	Qvality PEP	Qvality q-value	# Protein Groups	# Proteins	# PSMs	Master Protein Accessions	# Missed Cleavages	Theo. MH+ [Da]	Area: F2: Sample	XCorr Sequest HT	Confidence Sequest HT	Percolator q-Value Sequest HT	Percolator PEP Sequest HT
	High	YASMTESSEICCR	2xCarbamidomethyl [C11; C12]	0,000457586	0	1	3	1	unk	0	1593,63419	9.63117e+06	2,59	High	0	0,00725
High	unk	len=559	>gnl|unk|Mii44253_c0_g3_i1_6 len=559; >gnl|unk|Mii44253_c0_g6_i1_6 len=559; >gnl|unk|Mii44253_c0_g2_i1_6 len=559; >gnl|unk|Mii44253_c0_g1_i1_6 len=559; >gnl|unk|Mii44253_c0_g5_i1_6 len=559	0,000	2,140	7	1	1	1	1	185	21,0	8,59	9.63117e+06	0,166	2,59	1
	Confidence	Sequence	Modifications	Qvality PEP	Qvality q-value	# Protein Groups	# Proteins	# PSMs	Master Protein Accessions	# Missed Cleavages	Theo. MH+ [Da]	Area: F2: Sample	XCorr Sequest HT	Confidence Sequest HT	Percolator q-Value Sequest HT	Percolator PEP Sequest HT
	High	YASMTESSEICCR	2xCarbamidomethyl [C11; C12]	0,000457586	0	1	3	1	unk	0	1593,63419	9.63117e+06	2,59	High	0	0,00725
High	unk	len=5129	>gnl|unk|Mii77722_c1_g1_i2_5 len=5129	0,000	2,122	1	2	3	2	1	1709	191,1	7,23	4.49893e+06	0,044	2,58	2
	Confidence	Sequence	Modifications	Qvality PEP	Qvality q-value	# Protein Groups	# Proteins	# PSMs	Master Protein Accessions	# Missed Cleavages	Theo. MH+ [Da]	Area: F2: Sample	XCorr Sequest HT	Confidence Sequest HT	Percolator q-Value Sequest HT	Percolator PEP Sequest HT
	High	LMTYKECCK	2xCarbamidomethyl [C7; C8]	0,0247865	0	1	1	2	unk	1	1232,54721	2.68351e+06	1,59	High	0	0,09817
	High	TFKTQCSEIASR	1xCarbamidomethyl [C6]	0,020175	0	1	1	1	unk	1	1427,69474	6.31436e+06	2,58	High	0	0,08141
High	unk	len=228	>gnl|unk|Mii68875_c0_g2_i1_6 len=228	0,000	2,098	28	2	4	2	1	75	7,7	4,94	2.55823e+07	1,512	8,97	2
	Confidence	Sequence	Modifications	Qvality PEP	Qvality q-value	# Protein Groups	# Proteins	# PSMs	Master Protein Accessions	# Missed Cleavages	Theo. MH+ [Da]	Area: F2: Sample	XCorr Sequest HT	Confidence Sequest HT	Percolator q-Value Sequest HT	Percolator PEP Sequest HT
	High	AGFAGDDAPR		0,0145991	0	1	21	2	unk	0	976,44828	2.13089e+07	2,12	High	0	0,06612
	High	HQGVMVGMGQK		0,0376886	0	1	26	2	unk	0	1171,57106	2.98557e+07	2,74	High	0	0,1206
High	unk	len=615	>gnl|unk|Mii73416_c1_g1_i5_3 len=615	0,000	2,038	9	1	1	1	1	204	22,3	6,80		0,166	3,27	1
	Confidence	Sequence	Modifications	Qvality PEP	Qvality q-value	# Protein Groups	# Proteins	# PSMs	Master Protein Accessions	# Missed Cleavages	Theo. MH+ [Da]	Area: F2: Sample	XCorr Sequest HT	Confidence Sequest HT	Percolator q-Value Sequest HT	Percolator PEP Sequest HT
	High	LNNLLESPLEELKSVVLIVR		0,000660872	0	1	8	1	unk	1	2278,33806		3,27	High	0	0,009162
High	unk	len=543	>gnl|unk|Mii73416_c1_g1_i4_3 len=543	0,000	2,038	11	1	1	1	1	180	19,5	8,73		0,194	3,27	1
	Confidence	Sequence	Modifications	Qvality PEP	Qvality q-value	# Protein Groups	# Proteins	# PSMs	Master Protein Accessions	# Missed Cleavages	Theo. MH+ [Da]	Area: F2: Sample	XCorr Sequest HT	Confidence Sequest HT	Percolator q-Value Sequest HT	Percolator PEP Sequest HT
	High	LNNLLESPLEELKSVVLIVR		0,000660872	0	1	8	1	unk	1	2278,33806		3,27	High	0	0,009162
High	unk	len=261	>gnl|unk|Mii69476_c1_g2_i1_6 len=261	0,000	2,013	22,093023255814	1	1	1	1	86	9,9	7,14	1.70646e+07	0,778	2,72	1
	Confidence	Sequence	Modifications	Qvality PEP	Qvality q-value	# Protein Groups	# Proteins	# PSMs	Master Protein Accessions	# Missed Cleavages	Theo. MH+ [Da]	Area: F2: Sample	XCorr Sequest HT	Confidence Sequest HT	Percolator q-Value Sequest HT	Percolator PEP Sequest HT
	High	YGSSRPWCSTDAVYQGNWK	1xCarbamidomethyl [C8]	0,000721826	0	1	6	1	unk	0	2262,00328	1.70646e+07	2,72	High	0	0,009706
High	unk	len=355	>gnl|unk|Mii72132_c0_g1_i3_2 len=355	0,000	2,013	16	1	1	1	1	118	14,1	7,91	1.70646e+07	0,292	2,72	1
	Confidence	Sequence	Modifications	Qvality PEP	Qvality q-value	# Protein Groups	# Proteins	# PSMs	Master Protein Accessions	# Missed Cleavages	Theo. MH+ [Da]	Area: F2: Sample	XCorr Sequest HT	Confidence Sequest HT	Percolator q-Value Sequest HT	Percolator PEP Sequest HT
	High	YGSSRPWCSTDAVYQGNWK	1xCarbamidomethyl [C8]	0,000721826	0	1	6	1	unk	0	2262,00328	1.70646e+07	2,72	High	0	0,009706
High	unk	len=809	>gnl|unk|Mii69476_c1_g1_i2_5 len=809	0,000	2,013	7,0631970260223	1	1	1	1	269	31,4	7,80	1.70646e+07	0,136	2,72	1
	Confidence	Sequence	Modifications	Qvality PEP	Qvality q-value	# Protein Groups	# Proteins	# PSMs	Master Protein Accessions	# Missed Cleavages	Theo. MH+ [Da]	Area: F2: Sample	XCorr Sequest HT	Confidence Sequest HT	Percolator q-Value Sequest HT	Percolator PEP Sequest HT
	High	YGSSRPWCSTDAVYQGNWK	1xCarbamidomethyl [C8]	0,000721826	0	1	6	1	unk	0	2262,00328	1.70646e+07	2,72	High	0	0,009706
High	unk	len=819	>gnl|unk|Mii69476_c1_g1_i1_6 len=819	0,000	2,013	6	1	1	1	1	273	32,0	8,32	1.70646e+07	0,136	2,72	1
	Confidence	Sequence	Modifications	Qvality PEP	Qvality q-value	# Protein Groups	# Proteins	# PSMs	Master Protein Accessions	# Missed Cleavages	Theo. MH+ [Da]	Area: F2: Sample	XCorr Sequest HT	Confidence Sequest HT	Percolator q-Value Sequest HT	Percolator PEP Sequest HT
	High	YGSSRPWCSTDAVYQGNWK	1xCarbamidomethyl [C8]	0,000721826	0	1	6	1	unk	0	2262,00328	1.70646e+07	2,72	High	0	0,009706
High	unk	len=775	>gnl|unk|Mii72132_c0_g1_i1_1 len=775	0,000	2,013	7	1	1	1	1	258	30,2	7,36	1.70646e+07	0,155	2,72	1
	Confidence	Sequence	Modifications	Qvality PEP	Qvality q-value	# Protein Groups	# Proteins	# PSMs	Master Protein Accessions	# Missed Cleavages	Theo. MH+ [Da]	Area: F2: Sample	XCorr Sequest HT	Confidence Sequest HT	Percolator q-Value Sequest HT	Percolator PEP Sequest HT
	High	YGSSRPWCSTDAVYQGNWK	1xCarbamidomethyl [C8]	0,000721826	0	1	6	1	unk	0	2262,00328	1.70646e+07	2,72	High	0	0,009706
High	unk	len=804	>gnl|unk|Mii72132_c0_g1_i2_1 len=804	0,000	2,013	7	1	1	1	1	268	31,2	7,65	1.70646e+07	0,129	2,72	1
	Confidence	Sequence	Modifications	Qvality PEP	Qvality q-value	# Protein Groups	# Proteins	# PSMs	Master Protein Accessions	# Missed Cleavages	Theo. MH+ [Da]	Area: F2: Sample	XCorr Sequest HT	Confidence Sequest HT	Percolator q-Value Sequest HT	Percolator PEP Sequest HT
	High	YGSSRPWCSTDAVYQGNWK	1xCarbamidomethyl [C8]	0,000721826	0	1	6	1	unk	0	2262,00328	1.70646e+07	2,72	High	0	0,009706
High	unk	len=1495	>gnl|unk|Mii62667_c1_g1_i1_3 len=1495	0,000	1,884	3	1	1	1	1	497	56,0	5,08	16780264	0,089	3,22	1
	Confidence	Sequence	Modifications	Qvality PEP	Qvality q-value	# Protein Groups	# Proteins	# PSMs	Master Protein Accessions	# Missed Cleavages	Theo. MH+ [Da]	Area: F2: Sample	XCorr Sequest HT	Confidence Sequest HT	Percolator q-Value Sequest HT	Percolator PEP Sequest HT
	High	GHYTEGAELVDSVLDVVRK		0,00114706	0	1	15	1	unk	1	2087,07676	16780264	3,22	High	0	0,01305
High	unk	len=1561	>gnl|unk|Mii63563_c0_g1_i4_5 len=1561	0,000	1,884	3	1	1	1	1	520	58,9	4,86	16780264	0,122	3,22	1
	Confidence	Sequence	Modifications	Qvality PEP	Qvality q-value	# Protein Groups	# Proteins	# PSMs	Master Protein Accessions	# Missed Cleavages	Theo. MH+ [Da]	Area: F2: Sample	XCorr Sequest HT	Confidence Sequest HT	Percolator q-Value Sequest HT	Percolator PEP Sequest HT
	High	GHYTEGAELVDSVLDVVRK		0,00114706	0	1	15	1	unk	1	2087,07676	16780264	3,22	High	0	0,01305
High	unk	len=1522	>gnl|unk|Mii63177_c3_g1_i1_5 len=1522	0,000	1,884	3	1	1	1	1	507	57,5	5,24	16780264	0,086	3,22	1
	Confidence	Sequence	Modifications	Qvality PEP	Qvality q-value	# Protein Groups	# Proteins	# PSMs	Master Protein Accessions	# Missed Cleavages	Theo. MH+ [Da]	Area: F2: Sample	XCorr Sequest HT	Confidence Sequest HT	Percolator q-Value Sequest HT	Percolator PEP Sequest HT
	High	GHYTEGAELVDSVLDVVRK		0,00114706	0	1	15	1	unk	1	2087,07676	16780264	3,22	High	0	0,01305
High	unk	len=1986	>gnl|unk|Mii59610_c0_g1_i1_4 len=1986	0,000	1,884	2	1	1	1	1	662	75,3	6,44	16780264	0,075	3,22	1
	Confidence	Sequence	Modifications	Qvality PEP	Qvality q-value	# Protein Groups	# Proteins	# PSMs	Master Protein Accessions	# Missed Cleavages	Theo. MH+ [Da]	Area: F2: Sample	XCorr Sequest HT	Confidence Sequest HT	Percolator q-Value Sequest HT	Percolator PEP Sequest HT
	High	GHYTEGAELVDSVLDVVRK		0,00114706	0	1	15	1	unk	1	2087,07676	16780264	3,22	High	0	0,01305
High	unk	len=361	>gnl|unk|Mii63563_c1_g2_i2_3 len=361	0,000	1,884	15	1	1	1	1	120	13,0	4,64	16780264	0,389	3,22	1
	Confidence	Sequence	Modifications	Qvality PEP	Qvality q-value	# Protein Groups	# Proteins	# PSMs	Master Protein Accessions	# Missed Cleavages	Theo. MH+ [Da]	Area: F2: Sample	XCorr Sequest HT	Confidence Sequest HT	Percolator q-Value Sequest HT	Percolator PEP Sequest HT
	High	GHYTEGAELVDSVLDVVRK		0,00114706	0	1	15	1	unk	1	2087,07676	16780264	3,22	High	0	0,01305
High	unk	len=1236	>gnl|unk|Mii63563_c1_g2_i1_3 len=1236	0,000	1,884	4	1	1	1	1	411	46,2	4,88	16780264	0,129	3,22	1
	Confidence	Sequence	Modifications	Qvality PEP	Qvality q-value	# Protein Groups	# Proteins	# PSMs	Master Protein Accessions	# Missed Cleavages	Theo. MH+ [Da]	Area: F2: Sample	XCorr Sequest HT	Confidence Sequest HT	Percolator q-Value Sequest HT	Percolator PEP Sequest HT
	High	GHYTEGAELVDSVLDVVRK		0,00114706	0	1	15	1	unk	1	2087,07676	16780264	3,22	High	0	0,01305
High	unk	len=1689	>gnl|unk|Mii59610_c0_g1_i3_4 len=1689	0,000	1,884	3	1	1	1	1	563	64,0	5,63	16780264	0,089	3,22	1
	Confidence	Sequence	Modifications	Qvality PEP	Qvality q-value	# Protein Groups	# Proteins	# PSMs	Master Protein Accessions	# Missed Cleavages	Theo. MH+ [Da]	Area: F2: Sample	XCorr Sequest HT	Confidence Sequest HT	Percolator q-Value Sequest HT	Percolator PEP Sequest HT
	High	GHYTEGAELVDSVLDVVRK		0,00114706	0	1	15	1	unk	1	2087,07676	16780264	3,22	High	0	0,01305
High	unk	len=1185	>gnl|unk|Mii63563_c0_g1_i2_4 len=1185	0,000	1,884	4	1	1	1	1	395	45,0	6,43	16780264	0,105	3,22	1
	Confidence	Sequence	Modifications	Qvality PEP	Qvality q-value	# Protein Groups	# Proteins	# PSMs	Master Protein Accessions	# Missed Cleavages	Theo. MH+ [Da]	Area: F2: Sample	XCorr Sequest HT	Confidence Sequest HT	Percolator q-Value Sequest HT	Percolator PEP Sequest HT
	High	GHYTEGAELVDSVLDVVRK		0,00114706	0	1	15	1	unk	1	2087,07676	16780264	3,22	High	0	0,01305
High	unk	len=547	>gnl|unk|Mii74023_c2_g1_i1_5 len=547	0,000	1,820	10,989010989011	1	1	1	1	182	19,8	8,90	1.65734e+07	0,166	2,13	1
	Confidence	Sequence	Modifications	Qvality PEP	Qvality q-value	# Protein Groups	# Proteins	# PSMs	Master Protein Accessions	# Missed Cleavages	Theo. MH+ [Da]	Area: F2: Sample	XCorr Sequest HT	Confidence Sequest HT	Percolator q-Value Sequest HT	Percolator PEP Sequest HT
	High	VLVSDGPDAPFSQCGQGPAK	1xCarbamidomethyl [C14]	0,0014513	0	1	5	1	unk	0	2029,96477	1.65734e+07	2,13	High	0	0,01514
High	unk	len=258	>gnl|unk|Mii74023_c1_g1_i4_2 len=258	0,000	1,820	23	1	1	1	1	86	9,1	9,54	1.65734e+07	0,389	2,13	1
	Confidence	Sequence	Modifications	Qvality PEP	Qvality q-value	# Protein Groups	# Proteins	# PSMs	Master Protein Accessions	# Missed Cleavages	Theo. MH+ [Da]	Area: F2: Sample	XCorr Sequest HT	Confidence Sequest HT	Percolator q-Value Sequest HT	Percolator PEP Sequest HT
	High	VLVSDGPDAPFSQCGQGPAK	1xCarbamidomethyl [C14]	0,0014513	0	1	5	1	unk	0	2029,96477	1.65734e+07	2,13	High	0	0,01514
High	unk	len=253	>gnl|unk|Mii74023_c1_g1_i2_2 len=253	0,000	1,820	23	1	1	1	1	84	9,2	9,45	1.65734e+07	0,389	2,13	1
	Confidence	Sequence	Modifications	Qvality PEP	Qvality q-value	# Protein Groups	# Proteins	# PSMs	Master Protein Accessions	# Missed Cleavages	Theo. MH+ [Da]	Area: F2: Sample	XCorr Sequest HT	Confidence Sequest HT	Percolator q-Value Sequest HT	Percolator PEP Sequest HT
	High	VLVSDGPDAPFSQCGQGPAK	1xCarbamidomethyl [C14]	0,0014513	0	1	5	1	unk	0	2029,96477	1.65734e+07	2,13	High	0	0,01514
High	unk	len=483	>gnl|unk|Mii74023_c1_g1_i1_2 len=483	0,000	1,820	25	1	1	1	1	160	17,4	8,31	1.65734e+07	0,233	2,13	1
	Confidence	Sequence	Modifications	Qvality PEP	Qvality q-value	# Protein Groups	# Proteins	# PSMs	Master Protein Accessions	# Missed Cleavages	Theo. MH+ [Da]	Area: F2: Sample	XCorr Sequest HT	Confidence Sequest HT	Percolator q-Value Sequest HT	Percolator PEP Sequest HT
	High	VLVSDGPDAPFSQCGQGPAK	1xCarbamidomethyl [C14]	0,0014513	0	1	5	1	unk	0	2029,96477	1.65734e+07	2,13	High	0	0,01514
High	unk	len=11655	>gnl|unk|Mii67859_c2_g1_i1_4 len=11655	0,000	1,801	0,257400257400257	1	1	1	1	3885	440,6	8,94	2.42685e+06	0,009	0,00	1
	Confidence	Sequence	Modifications	Qvality PEP	Qvality q-value	# Protein Groups	# Proteins	# PSMs	Master Protein Accessions	# Missed Cleavages	Theo. MH+ [Da]	Area: F2: Sample	XCorr Sequest HT	Confidence Sequest HT	Percolator q-Value Sequest HT	Percolator PEP Sequest HT
	High	ILKDDQVVKR		0,00155058	0	1	1	1	unk	2	1213,72630	2.42685e+06	1,90	High	0	0,01582
High	unk	len=2593	>gnl|unk|Mii78791_c0_g1_i6_2 len=2593	0,000	1,443	1	1	3	1	1	864	96,4	9,28	1.31899e+07	0,055	7,98	1
	Confidence	Sequence	Modifications	Qvality PEP	Qvality q-value	# Protein Groups	# Proteins	# PSMs	Master Protein Accessions	# Missed Cleavages	Theo. MH+ [Da]	Area: F2: Sample	XCorr Sequest HT	Confidence Sequest HT	Percolator q-Value Sequest HT	Percolator PEP Sequest HT
	High	WNPGQPDNAGHR		0,00565513	0	1	3	3	unk	0	1348,61412	1.31899e+07	3,10	High	0	0,03653
High	unk	len=676	>gnl|unk|Mii74023_c3_g1_i1_2 len=676	0,000	1,195	6	1	1	1	1	225	25,3	5,20	4.22354e+07	0,179	0,00	1
	Confidence	Sequence	Modifications	Qvality PEP	Qvality q-value	# Protein Groups	# Proteins	# PSMs	Master Protein Accessions	# Missed Cleavages	Theo. MH+ [Da]	Area: F2: Sample	XCorr Sequest HT	Confidence Sequest HT	Percolator q-Value Sequest HT	Percolator PEP Sequest HT
	High	SNKPWCSLDSEYQGR	1xCarbamidomethyl [C6]	0,0137652	0	1	2	1	unk	0	1826,81262	4.22354e+07	1,85	High	0	0,06377
High	unk	len=1453	>gnl|unk|Mii65083_c0_g1_i1_6 len=1453	0,000	1,180	2,0703933747412	1	2	1	1	483	55,5	7,27	2.13089e+07	0,077	4,07	1
	Confidence	Sequence	Modifications	Qvality PEP	Qvality q-value	# Protein Groups	# Proteins	# PSMs	Master Protein Accessions	# Missed Cleavages	Theo. MH+ [Da]	Area: F2: Sample	XCorr Sequest HT	Confidence Sequest HT	Percolator q-Value Sequest HT	Percolator PEP Sequest HT
	High	AGFAGDDAPR		0,0145991	0	1	21	2	unk	0	976,44828	2.13089e+07	2,12	High	0	0,06612
High	unk	len=282	>gnl|unk|Mii6910_c0_g1_i1_1 len=282	0,000	1,091	15	1	2	1	1	94	11,1	8,47	1.23034e+07	0,468	2,69	1
	Confidence	Sequence	Modifications	Qvality PEP	Qvality q-value	# Protein Groups	# Proteins	# PSMs	Master Protein Accessions	# Missed Cleavages	Theo. MH+ [Da]	Area: F2: Sample	XCorr Sequest HT	Confidence Sequest HT	Percolator q-Value Sequest HT	Percolator PEP Sequest HT
	High	LHDGEMMDFDSEVKR		0,020175	0	1	2	2	unk	1	1808,79419	1.23034e+07	2,69	High	0	0,0811
High	unk	len=266	>gnl|unk|Mii76739_c0_g1_i2_6 len=266	0,000	1,053	16	1	1	1	1	86	9,4	9,31	6.36156e+06	0,468	2,36	1
	Confidence	Sequence	Modifications	Qvality PEP	Qvality q-value	# Protein Groups	# Proteins	# PSMs	Master Protein Accessions	# Missed Cleavages	Theo. MH+ [Da]	Area: F2: Sample	XCorr Sequest HT	Confidence Sequest HT	Percolator q-Value Sequest HT	Percolator PEP Sequest HT
	High	VGGSHTSSVGGGFK		0,0231995	0	1	2	1	unk	0	1276,62804	6.36156e+06	2,36	High	0	0,08861
High	unk	len=279	>gnl|unk|Mii76739_c2_g1_i2_2 len=279	0,000	1,053	15	1	1	1	1	93	9,6	9,50	6.36156e+06	0,334	2,36	1
	Confidence	Sequence	Modifications	Qvality PEP	Qvality q-value	# Protein Groups	# Proteins	# PSMs	Master Protein Accessions	# Missed Cleavages	Theo. MH+ [Da]	Area: F2: Sample	XCorr Sequest HT	Confidence Sequest HT	Percolator q-Value Sequest HT	Percolator PEP Sequest HT
	High	VGGSHTSSVGGGFK		0,0231995	0	1	2	1	unk	0	1276,62804	6.36156e+06	2,36	High	0	0,08861
High	unk	len=971	>gnl|unk|Mii77974_c0_g1_i13_4 len=971	0,000	0,980	4	1	1	1	1	323	36,3	5,24	7.23827e+07	0,145	0,00	1
	Confidence	Sequence	Modifications	Qvality PEP	Qvality q-value	# Protein Groups	# Proteins	# PSMs	Master Protein Accessions	# Missed Cleavages	Theo. MH+ [Da]	Area: F2: Sample	XCorr Sequest HT	Confidence Sequest HT	Percolator q-Value Sequest HT	Percolator PEP Sequest HT
	High	SYELPDGQVITIGNER		0,0302289	0	1	31	1	unk	0	1790,89192	7.23827e+07	1,10	High	0	0,1047
High	unk	len=585	>gnl|unk|Mii77974_c0_g1_i1_4 len=585	0,000	0,980	8,2051282051282	1	1	1	1	195	21,8	5,41	7.23827e+07	0,233	0,00	1
	Confidence	Sequence	Modifications	Qvality PEP	Qvality q-value	# Protein Groups	# Proteins	# PSMs	Master Protein Accessions	# Missed Cleavages	Theo. MH+ [Da]	Area: F2: Sample	XCorr Sequest HT	Confidence Sequest HT	Percolator q-Value Sequest HT	Percolator PEP Sequest HT
	High	SYELPDGQVITIGNER		0,0302289	0	1	31	1	unk	0	1790,89192	7.23827e+07	1,10	High	0	0,1047
High	unk	len=634	>gnl|unk|Mii77974_c0_g1_i20_5 len=634	0,000	0,980	7	1	1	1	1	211	23,4	5,17	7.23827e+07	0,233	0,00	1
	Confidence	Sequence	Modifications	Qvality PEP	Qvality q-value	# Protein Groups	# Proteins	# PSMs	Master Protein Accessions	# Missed Cleavages	Theo. MH+ [Da]	Area: F2: Sample	XCorr Sequest HT	Confidence Sequest HT	Percolator q-Value Sequest HT	Percolator PEP Sequest HT
	High	SYELPDGQVITIGNER		0,0302289	0	1	31	1	unk	0	1790,89192	7.23827e+07	1,10	High	0	0,1047
High	unk	len=639	>gnl|unk|Mii77974_c0_g1_i16_4 len=639	0,000	0,980	7	1	1	1	1	211	23,7	5,90	7.23827e+07	0,233	0,00	1
	Confidence	Sequence	Modifications	Qvality PEP	Qvality q-value	# Protein Groups	# Proteins	# PSMs	Master Protein Accessions	# Missed Cleavages	Theo. MH+ [Da]	Area: F2: Sample	XCorr Sequest HT	Confidence Sequest HT	Percolator q-Value Sequest HT	Percolator PEP Sequest HT
	High	SYELPDGQVITIGNER		0,0302289	0	1	31	1	unk	0	1790,89192	7.23827e+07	1,10	High	0	0,1047
High	unk	len=234	>gnl|unk|Mii47890_c0_g3_i1_6 len=234	0,000	0,980	20	1	1	1	1	78	8,6	4,65	7.23827e+07	0,585	0,00	1
	Confidence	Sequence	Modifications	Qvality PEP	Qvality q-value	# Protein Groups	# Proteins	# PSMs	Master Protein Accessions	# Missed Cleavages	Theo. MH+ [Da]	Area: F2: Sample	XCorr Sequest HT	Confidence Sequest HT	Percolator q-Value Sequest HT	Percolator PEP Sequest HT
	High	SYELPDGQVITIGNER		0,0302289	0	1	31	1	unk	0	1790,89192	7.23827e+07	1,10	High	0	0,1047
High	unk	len=681	>gnl|unk|Mii77974_c0_g1_i10_4 len=681	0,000	0,980	7	1	1	1	1	227	25,4	5,47	7.23827e+07	0,179	0,00	1
	Confidence	Sequence	Modifications	Qvality PEP	Qvality q-value	# Protein Groups	# Proteins	# PSMs	Master Protein Accessions	# Missed Cleavages	Theo. MH+ [Da]	Area: F2: Sample	XCorr Sequest HT	Confidence Sequest HT	Percolator q-Value Sequest HT	Percolator PEP Sequest HT
	High	SYELPDGQVITIGNER		0,0302289	0	1	31	1	unk	0	1790,89192	7.23827e+07	1,10	High	0	0,1047
High	unk	len=639	>gnl|unk|Mii77974_c0_g1_i11_4 len=639	0,000	0,980	7	1	1	1	1	211	23,7	5,90	7.23827e+07	0,233	0,00	1
	Confidence	Sequence	Modifications	Qvality PEP	Qvality q-value	# Protein Groups	# Proteins	# PSMs	Master Protein Accessions	# Missed Cleavages	Theo. MH+ [Da]	Area: F2: Sample	XCorr Sequest HT	Confidence Sequest HT	Percolator q-Value Sequest HT	Percolator PEP Sequest HT
	High	SYELPDGQVITIGNER		0,0302289	0	1	31	1	unk	0	1790,89192	7.23827e+07	1,10	High	0	0,1047
High	unk	len=264	>gnl|unk|Mii77974_c0_g1_i3_6 len=264	0,000	0,980	18	1	1	1	1	87	9,5	4,61	7.23827e+07	0,585	0,00	1
	Confidence	Sequence	Modifications	Qvality PEP	Qvality q-value	# Protein Groups	# Proteins	# PSMs	Master Protein Accessions	# Missed Cleavages	Theo. MH+ [Da]	Area: F2: Sample	XCorr Sequest HT	Confidence Sequest HT	Percolator q-Value Sequest HT	Percolator PEP Sequest HT
	High	SYELPDGQVITIGNER		0,0302289	0	1	31	1	unk	0	1790,89192	7.23827e+07	1,10	High	0	0,1047
High	unk	len=1025	>gnl|unk|Mii77974_c0_g1_i15_4 len=1025	0,000	0,980	4	1	1	1	1	339	38,2	5,44	7.23827e+07	0,145	0,00	1
	Confidence	Sequence	Modifications	Qvality PEP	Qvality q-value	# Protein Groups	# Proteins	# PSMs	Master Protein Accessions	# Missed Cleavages	Theo. MH+ [Da]	Area: F2: Sample	XCorr Sequest HT	Confidence Sequest HT	Percolator q-Value Sequest HT	Percolator PEP Sequest HT
	High	SYELPDGQVITIGNER		0,0302289	0	1	31	1	unk	0	1790,89192	7.23827e+07	1,10	High	0	0,1047
High	unk	len=780	>gnl|unk|Mii77974_c0_g1_i8_4 len=780	0,000	0,980	6,2015503875969	1	1	1	1	258	28,8	5,49	7.23827e+07	0,179	0,00	1
	Confidence	Sequence	Modifications	Qvality PEP	Qvality q-value	# Protein Groups	# Proteins	# PSMs	Master Protein Accessions	# Missed Cleavages	Theo. MH+ [Da]	Area: F2: Sample	XCorr Sequest HT	Confidence Sequest HT	Percolator q-Value Sequest HT	Percolator PEP Sequest HT
	High	SYELPDGQVITIGNER		0,0302289	0	1	31	1	unk	0	1790,89192	7.23827e+07	1,10	High	0	0,1047
High	unk	len=786	>gnl|unk|Mii77974_c0_g1_i5_4 len=786	0,000	0,980	6	1	1	1	1	262	29,1	5,35	7.23827e+07	0,166	0,00	1
	Confidence	Sequence	Modifications	Qvality PEP	Qvality q-value	# Protein Groups	# Proteins	# PSMs	Master Protein Accessions	# Missed Cleavages	Theo. MH+ [Da]	Area: F2: Sample	XCorr Sequest HT	Confidence Sequest HT	Percolator q-Value Sequest HT	Percolator PEP Sequest HT
	High	SYELPDGQVITIGNER		0,0302289	0	1	31	1	unk	0	1790,89192	7.23827e+07	1,10	High	0	0,1047
High	unk	len=615	>gnl|unk|Mii77974_c0_g1_i14_4 len=615	0,000	0,980	7	1	1	1	1	205	23,1	5,30	7.23827e+07	0,212	0,00	1
	Confidence	Sequence	Modifications	Qvality PEP	Qvality q-value	# Protein Groups	# Proteins	# PSMs	Master Protein Accessions	# Missed Cleavages	Theo. MH+ [Da]	Area: F2: Sample	XCorr Sequest HT	Confidence Sequest HT	Percolator q-Value Sequest HT	Percolator PEP Sequest HT
	High	SYELPDGQVITIGNER		0,0302289	0	1	31	1	unk	0	1790,89192	7.23827e+07	1,10	High	0	0,1047
High	unk	len=312	>gnl|unk|Mii47890_c0_g1_i1_6 len=312	0,000	0,980	15	1	1	1	1	104	11,4	5,41	7.23827e+07	0,468	0,00	1
	Confidence	Sequence	Modifications	Qvality PEP	Qvality q-value	# Protein Groups	# Proteins	# PSMs	Master Protein Accessions	# Missed Cleavages	Theo. MH+ [Da]	Area: F2: Sample	XCorr Sequest HT	Confidence Sequest HT	Percolator q-Value Sequest HT	Percolator PEP Sequest HT
	High	SYELPDGQVITIGNER		0,0302289	0	1	31	1	unk	0	1790,89192	7.23827e+07	1,10	High	0	0,1047
High	unk	len=735	>gnl|unk|Mii77974_c0_g1_i4_4 len=735	0,000	0,980	6,5843621399177	1	1	1	1	243	27,3	5,88	7.23827e+07	0,179	0,00	1
	Confidence	Sequence	Modifications	Qvality PEP	Qvality q-value	# Protein Groups	# Proteins	# PSMs	Master Protein Accessions	# Missed Cleavages	Theo. MH+ [Da]	Area: F2: Sample	XCorr Sequest HT	Confidence Sequest HT	Percolator q-Value Sequest HT	Percolator PEP Sequest HT
	High	SYELPDGQVITIGNER		0,0302289	0	1	31	1	unk	0	1790,89192	7.23827e+07	1,10	High	0	0,1047
High	unk	len=639	>gnl|unk|Mii51784_c0_g2_i1_3 len=639	0,000	0,980	7	1	1	1	1	212	23,5	5,44	7.23827e+07	0,212	0,00	1
	Confidence	Sequence	Modifications	Qvality PEP	Qvality q-value	# Protein Groups	# Proteins	# PSMs	Master Protein Accessions	# Missed Cleavages	Theo. MH+ [Da]	Area: F2: Sample	XCorr Sequest HT	Confidence Sequest HT	Percolator q-Value Sequest HT	Percolator PEP Sequest HT
	High	SYELPDGQVITIGNER		0,0302289	0	1	31	1	unk	0	1790,89192	7.23827e+07	1,10	High	0	0,1047
High	unk	len=293	>gnl|unk|Mii77974_c0_g5_i1_6 len=293	0,000	0,980	16	1	1	1	1	98	10,6	5,08	7.23827e+07	0,468	0,00	1
	Confidence	Sequence	Modifications	Qvality PEP	Qvality q-value	# Protein Groups	# Proteins	# PSMs	Master Protein Accessions	# Missed Cleavages	Theo. MH+ [Da]	Area: F2: Sample	XCorr Sequest HT	Confidence Sequest HT	Percolator q-Value Sequest HT	Percolator PEP Sequest HT
	High	SYELPDGQVITIGNER		0,0302289	0	1	31	1	unk	0	1790,89192	7.23827e+07	1,10	High	0	0,1047
High	unk	len=828	>gnl|unk|Mii77974_c0_g1_i2_4 len=828	0,000	0,980	5	1	1	1	1	274	30,5	5,66	7.23827e+07	0,166	0,00	1
	Confidence	Sequence	Modifications	Qvality PEP	Qvality q-value	# Protein Groups	# Proteins	# PSMs	Master Protein Accessions	# Missed Cleavages	Theo. MH+ [Da]	Area: F2: Sample	XCorr Sequest HT	Confidence Sequest HT	Percolator q-Value Sequest HT	Percolator PEP Sequest HT
	High	SYELPDGQVITIGNER		0,0302289	0	1	31	1	unk	0	1790,89192	7.23827e+07	1,10	High	0	0,1047
High	unk	len=615	>gnl|unk|Mii77974_c0_g1_i12_4 len=615	0,000	0,980	7	1	1	1	1	205	23,1	5,30	7.23827e+07	0,212	0,00	1
	Confidence	Sequence	Modifications	Qvality PEP	Qvality q-value	# Protein Groups	# Proteins	# PSMs	Master Protein Accessions	# Missed Cleavages	Theo. MH+ [Da]	Area: F2: Sample	XCorr Sequest HT	Confidence Sequest HT	Percolator q-Value Sequest HT	Percolator PEP Sequest HT
	High	SYELPDGQVITIGNER		0,0302289	0	1	31	1	unk	0	1790,89192	7.23827e+07	1,10	High	0	0,1047
High	unk	len=345	>gnl|unk|Mii77974_c0_g1_i19_4 len=345	0,000	0,980	13	1	1	1	1	115	12,7	4,91	7.23827e+07	0,468	0,00	1
	Confidence	Sequence	Modifications	Qvality PEP	Qvality q-value	# Protein Groups	# Proteins	# PSMs	Master Protein Accessions	# Missed Cleavages	Theo. MH+ [Da]	Area: F2: Sample	XCorr Sequest HT	Confidence Sequest HT	Percolator q-Value Sequest HT	Percolator PEP Sequest HT
	High	SYELPDGQVITIGNER		0,0302289	0	1	31	1	unk	0	1790,89192	7.23827e+07	1,10	High	0	0,1047
High	unk	len=726	>gnl|unk|Mii77974_c0_g1_i22_4 len=726	0,000	0,980	6	1	1	1	1	242	26,9	5,22	7.23827e+07	0,179	0,00	1
	Confidence	Sequence	Modifications	Qvality PEP	Qvality q-value	# Protein Groups	# Proteins	# PSMs	Master Protein Accessions	# Missed Cleavages	Theo. MH+ [Da]	Area: F2: Sample	XCorr Sequest HT	Confidence Sequest HT	Percolator q-Value Sequest HT	Percolator PEP Sequest HT
	High	SYELPDGQVITIGNER		0,0302289	0	1	31	1	unk	0	1790,89192	7.23827e+07	1,10	High	0	0,1047
High	unk	len=615	>gnl|unk|Mii77974_c0_g1_i21_4 len=615	0,000	0,980	7	1	1	1	1	205	23,1	5,30	7.23827e+07	0,212	0,00	1
	Confidence	Sequence	Modifications	Qvality PEP	Qvality q-value	# Protein Groups	# Proteins	# PSMs	Master Protein Accessions	# Missed Cleavages	Theo. MH+ [Da]	Area: F2: Sample	XCorr Sequest HT	Confidence Sequest HT	Percolator q-Value Sequest HT	Percolator PEP Sequest HT
	High	SYELPDGQVITIGNER		0,0302289	0	1	31	1	unk	0	1790,89192	7.23827e+07	1,10	High	0	0,1047
High	unk	len=585	>gnl|unk|Mii64514_c0_g1_i3_3 len=585	0,000	0,980	8	1	1	1	1	194	21,8	5,15	7.23827e+07	0,259	0,00	1
	Confidence	Sequence	Modifications	Qvality PEP	Qvality q-value	# Protein Groups	# Proteins	# PSMs	Master Protein Accessions	# Missed Cleavages	Theo. MH+ [Da]	Area: F2: Sample	XCorr Sequest HT	Confidence Sequest HT	Percolator q-Value Sequest HT	Percolator PEP Sequest HT
	High	SYELPDGQVITIGNER		0,0302289	0	1	31	1	unk	0	1790,89192	7.23827e+07	1,10	High	0	0,1047
High	unk	len=5206	>gnl|unk|Mii79122_c0_g1_i2_6 len=5206	0,000	0,919	0,634005763688761	1	2	1	1	1735	195,5	5,31	2.98557e+07	0,021	4,90	1
	Confidence	Sequence	Modifications	Qvality PEP	Qvality q-value	# Protein Groups	# Proteins	# PSMs	Master Protein Accessions	# Missed Cleavages	Theo. MH+ [Da]	Area: F2: Sample	XCorr Sequest HT	Confidence Sequest HT	Percolator q-Value Sequest HT	Percolator PEP Sequest HT
	High	HQGVMVGMGQK		0,0376886	0	1	26	2	unk	0	1171,57106	2.98557e+07	2,74	High	0	0,1206
High	unk	len=803	>gnl|unk|Mii79122_c0_g1_i5_6 len=803	0,000	0,919	4	1	2	1	1	267	29,7	4,67	2.98557e+07	0,233	4,90	1
	Confidence	Sequence	Modifications	Qvality PEP	Qvality q-value	# Protein Groups	# Proteins	# PSMs	Master Protein Accessions	# Missed Cleavages	Theo. MH+ [Da]	Area: F2: Sample	XCorr Sequest HT	Confidence Sequest HT	Percolator q-Value Sequest HT	Percolator PEP Sequest HT
	High	HQGVMVGMGQK		0,0376886	0	1	26	2	unk	0	1171,57106	2.98557e+07	2,74	High	0	0,1206
High	unk	len=1432	>gnl|unk|Mii79122_c0_g1_i4_6 len=1432	0,000	0,919	2	1	2	1	1	477	54,3	4,81	2.98557e+07	0,083	4,90	1
	Confidence	Sequence	Modifications	Qvality PEP	Qvality q-value	# Protein Groups	# Proteins	# PSMs	Master Protein Accessions	# Missed Cleavages	Theo. MH+ [Da]	Area: F2: Sample	XCorr Sequest HT	Confidence Sequest HT	Percolator q-Value Sequest HT	Percolator PEP Sequest HT
	High	HQGVMVGMGQK		0,0376886	0	1	26	2	unk	0	1171,57106	2.98557e+07	2,74	High	0	0,1206
High	unk	len=276	>gnl|unk|Mii5966_c0_g1_i1_5 len=276	0,000	0,801	13	1	1	1	1	91	10,7	8,07	2.33938e+07	0,778	2,09	1
	Confidence	Sequence	Modifications	Qvality PEP	Qvality q-value	# Protein Groups	# Proteins	# PSMs	Master Protein Accessions	# Missed Cleavages	Theo. MH+ [Da]	Area: F2: Sample	XCorr Sequest HT	Confidence Sequest HT	Percolator q-Value Sequest HT	Percolator PEP Sequest HT
	High	SPCKFPFTYQGK	1xCarbamidomethyl [C3]	0,0585846	0	1	4	1	unk	1	1459,70385	2.33938e+07	2,09	High	0	0,1581
High	unk	len=473	>gnl|unk|Mii59862_c0_g2_i1_6 len=473	0,000	0,801	7	1	1	1	1	157	18,1	8,10	2.33938e+07	0,389	2,09	1
	Confidence	Sequence	Modifications	Qvality PEP	Qvality q-value	# Protein Groups	# Proteins	# PSMs	Master Protein Accessions	# Missed Cleavages	Theo. MH+ [Da]	Area: F2: Sample	XCorr Sequest HT	Confidence Sequest HT	Percolator q-Value Sequest HT	Percolator PEP Sequest HT
	High	SPCKFPFTYQGK	1xCarbamidomethyl [C3]	0,0585846	0	1	4	1	unk	1	1459,70385	2.33938e+07	2,09	High	0	0,1581
High	unk	len=723	>gnl|unk|Mii63360_c1_g1_i2_2 len=723	0,000	0,801	4,9792531120332	1	1	1	1	241	27,9	8,82	2.33938e+07	0,179	2,09	1
	Confidence	Sequence	Modifications	Qvality PEP	Qvality q-value	# Protein Groups	# Proteins	# PSMs	Master Protein Accessions	# Missed Cleavages	Theo. MH+ [Da]	Area: F2: Sample	XCorr Sequest HT	Confidence Sequest HT	Percolator q-Value Sequest HT	Percolator PEP Sequest HT
	High	SPCKFPFTYQGK	1xCarbamidomethyl [C3]	0,0585846	0	1	4	1	unk	1	1459,70385	2.33938e+07	2,09	High	0	0,1581
High	unk	len=252	>gnl|unk|Mii75165_c6_g1_i1_6 len=252	0,000	0,801	14	1	1	1	1	83	9,7	9,54	2.33938e+07	0,585	2,09	1
	Confidence	Sequence	Modifications	Qvality PEP	Qvality q-value	# Protein Groups	# Proteins	# PSMs	Master Protein Accessions	# Missed Cleavages	Theo. MH+ [Da]	Area: F2: Sample	XCorr Sequest HT	Confidence Sequest HT	Percolator q-Value Sequest HT	Percolator PEP Sequest HT
	High	SPCKFPFTYQGK	1xCarbamidomethyl [C3]	0,0585846	0	1	4	1	unk	1	1459,70385	2.33938e+07	2,09	High	0	0,1581
High	unk	len=925	>gnl|unk|Mii66880_c1_g1_i2_3 len=925	0,000	0,793	3	1	1	1	1	307	34,5	5,02	1.34003e+07	0,129	2,21	1
	Confidence	Sequence	Modifications	Qvality PEP	Qvality q-value	# Protein Groups	# Proteins	# PSMs	Master Protein Accessions	# Missed Cleavages	Theo. MH+ [Da]	Area: F2: Sample	XCorr Sequest HT	Confidence Sequest HT	Percolator q-Value Sequest HT	Percolator PEP Sequest HT
	High	LDHKFDLMYAK		0,060333	0	1	32	1	unk	1	1380,69803	1.34003e+07	2,21	High	0	0,1609
High	unk	len=1098	>gnl|unk|Mii66880_c2_g1_i2_4 len=1098	0,000	0,793	3	1	1	1	1	366	41,6	5,44	1.34003e+07	0,122	2,21	1
	Confidence	Sequence	Modifications	Qvality PEP	Qvality q-value	# Protein Groups	# Proteins	# PSMs	Master Protein Accessions	# Missed Cleavages	Theo. MH+ [Da]	Area: F2: Sample	XCorr Sequest HT	Confidence Sequest HT	Percolator q-Value Sequest HT	Percolator PEP Sequest HT
	High	LDHKFDLMYAK		0,060333	0	1	32	1	unk	1	1380,69803	1.34003e+07	2,21	High	0	0,1609
High	unk	len=267	>gnl|unk|Mii118150_c0_g1_i1_6 len=267	0,000	0,793	12	1	1	1	1	89	10,4	4,45	1.34003e+07	0,468	2,21	1
	Confidence	Sequence	Modifications	Qvality PEP	Qvality q-value	# Protein Groups	# Proteins	# PSMs	Master Protein Accessions	# Missed Cleavages	Theo. MH+ [Da]	Area: F2: Sample	XCorr Sequest HT	Confidence Sequest HT	Percolator q-Value Sequest HT	Percolator PEP Sequest HT
	High	LDHKFDLMYAK		0,060333	0	1	32	1	unk	1	1380,69803	1.34003e+07	2,21	High	0	0,1609
High	unk	len=409	>gnl|unk|Mii102341_c0_g1_i1_3 len=409	0,000	0,793	8	1	1	1	1	135	15,1	8,25	1.34003e+07	0,259	2,21	1
	Confidence	Sequence	Modifications	Qvality PEP	Qvality q-value	# Protein Groups	# Proteins	# PSMs	Master Protein Accessions	# Missed Cleavages	Theo. MH+ [Da]	Area: F2: Sample	XCorr Sequest HT	Confidence Sequest HT	Percolator q-Value Sequest HT	Percolator PEP Sequest HT
	High	LDHKFDLMYAK		0,060333	0	1	32	1	unk	1	1380,69803	1.34003e+07	2,21	High	0	0,1609
High	unk	len=923	>gnl|unk|Mii66880_c1_g1_i1_3 len=923	0,000	0,793	3	1	1	1	1	307	34,9	5,22	1.34003e+07	0,129	2,21	1
	Confidence	Sequence	Modifications	Qvality PEP	Qvality q-value	# Protein Groups	# Proteins	# PSMs	Master Protein Accessions	# Missed Cleavages	Theo. MH+ [Da]	Area: F2: Sample	XCorr Sequest HT	Confidence Sequest HT	Percolator q-Value Sequest HT	Percolator PEP Sequest HT
	High	LDHKFDLMYAK		0,060333	0	1	32	1	unk	1	1380,69803	1.34003e+07	2,21	High	0	0,1609
High	unk	len=437	>gnl|unk|Mii52200_c0_g1_i1_6 len=437	0,000	0,793	7	1	1	1	1	145	16,2	6,30	1.34003e+07	0,259	2,21	1
	Confidence	Sequence	Modifications	Qvality PEP	Qvality q-value	# Protein Groups	# Proteins	# PSMs	Master Protein Accessions	# Missed Cleavages	Theo. MH+ [Da]	Area: F2: Sample	XCorr Sequest HT	Confidence Sequest HT	Percolator q-Value Sequest HT	Percolator PEP Sequest HT
	High	LDHKFDLMYAK		0,060333	0	1	32	1	unk	1	1380,69803	1.34003e+07	2,21	High	0	0,1609
High	unk	len=1214	>gnl|unk|Mii66880_c2_g1_i4_6 len=1214	0,000	0,793	2	1	1	1	1	404	45,3	5,16	1.34003e+07	0,136	2,21	1
	Confidence	Sequence	Modifications	Qvality PEP	Qvality q-value	# Protein Groups	# Proteins	# PSMs	Master Protein Accessions	# Missed Cleavages	Theo. MH+ [Da]	Area: F2: Sample	XCorr Sequest HT	Confidence Sequest HT	Percolator q-Value Sequest HT	Percolator PEP Sequest HT
	High	LDHKFDLMYAK		0,060333	0	1	32	1	unk	1	1380,69803	1.34003e+07	2,21	High	0	0,1609
High	unk	len=867	>gnl|unk|Mii67606_c0_g2_i1_3 len=867	0,000	0,793	3	1	1	1	1	288	32,5	5,62	1.34003e+07	0,155	2,21	1
	Confidence	Sequence	Modifications	Qvality PEP	Qvality q-value	# Protein Groups	# Proteins	# PSMs	Master Protein Accessions	# Missed Cleavages	Theo. MH+ [Da]	Area: F2: Sample	XCorr Sequest HT	Confidence Sequest HT	Percolator q-Value Sequest HT	Percolator PEP Sequest HT
	High	LDHKFDLMYAK		0,060333	0	1	32	1	unk	1	1380,69803	1.34003e+07	2,21	High	0	0,1609
High	unk	len=1387	>gnl|unk|Mii61472_c0_g1_i1_5 len=1387	0,000	0,793	2	1	1	1	1	462	51,8	6,76	1.34003e+07	0,101	2,21	1
	Confidence	Sequence	Modifications	Qvality PEP	Qvality q-value	# Protein Groups	# Proteins	# PSMs	Master Protein Accessions	# Missed Cleavages	Theo. MH+ [Da]	Area: F2: Sample	XCorr Sequest HT	Confidence Sequest HT	Percolator q-Value Sequest HT	Percolator PEP Sequest HT
	High	LDHKFDLMYAK		0,060333	0	1	32	1	unk	1	1380,69803	1.34003e+07	2,21	High	0	0,1609
High	unk	len=743	>gnl|unk|Mii66880_c1_g1_i5_3 len=743	0,000	0,793	4	1	1	1	1	247	28,2	5,48	1.34003e+07	0,155	2,21	1
	Confidence	Sequence	Modifications	Qvality PEP	Qvality q-value	# Protein Groups	# Proteins	# PSMs	Master Protein Accessions	# Missed Cleavages	Theo. MH+ [Da]	Area: F2: Sample	XCorr Sequest HT	Confidence Sequest HT	Percolator q-Value Sequest HT	Percolator PEP Sequest HT
	High	LDHKFDLMYAK		0,060333	0	1	32	1	unk	1	1380,69803	1.34003e+07	2,21	High	0	0,1609
High	unk	len=1477	>gnl|unk|Mii71385_c1_g1_i6_3 len=1477	0,000	0,793	2	1	1	1	1	491	56,0	8,31	1.34003e+07	0,086	2,21	1
[truncated: 80 more rows]

## Sheet: footprints of amp tails 2
Accession	Description	FASTA Title Lines	Coverage [%]	# Peptides	# Unique Peptides	# Protein Groups	# AAs	MW [kDa]	calc. pI	Abundance: F2: Sample
[truncated: 332 more rows]

[truncated: 3 more sheets: footprints of amp tails 3, footprints of amp tails 4, footprints of amp tails 5]
