# Supplementary material for: Temporary adhesion of the proseriate flatworm Minona ileanae
Source: Philos Trans R Soc Lond B Biol Sci. 2019 Sep 9;374(1784):20190194. doi: 10.1098/rstb.2019.0194 (PMC6745481; doi:10.1098/rstb.2019.0194)
Supplement: Supplementary data S1 on gene selection for expression screening and differential RNA-seq [file rstb20190194supp2.xlsx]

## Sheet: ISH screen selection
Adhesion Gene ID	Gen Bank ID	Transcript ID	Transcript Sequence	Primer FW (5'-3')	Primer 2 RV (5'-3')	length	log2FoldChange	pvalue	MiA1	MiA2	MiA3	Mii1	Mii2	Mii3	Lowest E-value NCBI	Description (E-value) NCBI	NCBI conserved dom search (transcript query)	Expression Tissue	Signal peptide
Mile-ap1	MK854810	Mii79253_c2_g1_i1	CTTTTACATTGTGGAGTTTTGTTTTATATCTTTCAGTGGAAGCAGAGTCTAGTGGAGTCAGCTTCTACATTTACAAATTTAGACTTTGCATTTGAGAACAGAAAATAAAAATGAAATTTTGGAAGATACTGTGTGCTTTGATATTGGTTCTCGGTGCTATTTTGTCTACCAGCAAGGCAGAATCGGAAGTAAAACTTCCCCCGAAATGCGCTGATTGGCGGAGCCAATGCTACTCATGGAGACACAACAATTACTGCGTGACGCATCCATTCAAGATGGCGCTGCACTGTCCACGCTGCTGCAAGTTCTGTACCGATAAGAAGAAAGAGATCTGCAGGGATAAAGTAGACTCCCACAAGTGCGAAAGGTGGAAATCTAAGGGAGCTTGTGCAAATTTTC…	AGATACGGAGACGACAAGTTGC	TTTGAGAAGAAGACCGCATAGC	5341	5.90747	4.30279e-128	5	10	10	1110	827	944	0	Fibrillin-1 [Trichoplax sp. H2]	C-type lectin domain; von Willebrand Factor dom D; C8 Domain; Trypsin Inh. Like; 15x EGF domain; 7x Ca binding EGF domain	Adhesion	Yes
Mile-ap2a	MK854811	Mii73416_c1_g1_i3	TCGAAGAAGTCATGAAAGATAATACAACAGGAACAGTTCAAGTGTCAATCAAACCGAAACCGAGTCAGCCCACTGATAAGCTGAGACCAAATGATAAGGATGGCTTGACATTACCCAATGGAGTCGATAATAAAATCAAATTGACATTTACCAAAGATGCAGTGCTAGTCACAAAGATCACATTGCAATCTCCTAAATCAGATGATTTGAAGAACGTAGAAAGTGTGACAGTGAAAACTGTGAAGCAAAACGGTTGGAAAGAAGATTTCTCCATCACACCGTCAACAGGAGCAACAACAAGTGAAACAACAGTTACAACTCCTTCGCAAACACAGAGTAAACCGAGTGGAGGAATAGTGGAGCGACTGAACAACTTATTGGAGAGTCCACTGGAAGAAC…	GTGAAAACTGTGAAGCAAAACG	GATCGAGATTAGGAATGGAACG	1272	0.609213	0.145341	29	42	48	172	85	87		none	none	Adhesion
Mile-ap2b	MK854812	Mii68239_c0_g1_i3	CACTGTCGTCACGAATTTGCCTCATGGTGGCAAAGTTTCACATCCTCCTCTTCCATCGTTCTCCAAAGGCAAATCTACAACAATGACAAACACTGTCGTCACGAATTTGCCTCATGGTGGCAAAGTTTCACATCCTCCTCTTCCATCGTTCTCCAAAGGCAAATCTACAACAATGACAAGCACTGTCGTCACGAATTTGCCTCATGGTGGCAAAGTTTCACATCCTCCTCTTCAACGTTTCTCAACTCGAAAGTCAACAGTATATACTTATAAATCCTTTACAACGCCTCGAGGTTGCATTCTTGTTGATGGATTTTCAAACGGAAAAATAAAACGTGAAATGTTAACAATATCTCCTCTAGATAAGTCTTTCACTAACTTGTTAGAAATTAATGACAC…	CTGGACAGACTGTAGCTCATCG	GAATTCTGGGTCGAATTGTAGC	2586	4.15825	4.35909e-71	9	20	13	487	353	378	2.2e-20	adhesion protein 2 [Macrostomum lignano]	Trypsin inh like (5.17e-12), 3 x Thrombospondin-1 repeat (2.24e-11 3.89e-8 9.95e-8)	Adhesion
Mile-ap3a	MK854813	Mii48141_c1_g1_i1	CTCTTCCGATCTGATCCTGAGAGTTGAATATTCAGGACCACAACCATGAACCTACCTTGGATACTTTCATGTGTAGTCTTCGCTTGCTTTATTCTATCGGCTCATGTAGACGCGAGAGAGAGTGTCAGAACAGTCAGAACTCCTTGTCAAAAAAACGACTGCGAGAATGGAGCTAAATGCGTAGAAGTAAAACGGCAGAAATGCGATTGCAAAAGAGGTAATGAAAACTGTGAATGCACAATCATTTCCTCACACAAAGTCTGTGAAAAATCAGGGATGACATCCTTAGAAAATCAAATAAGAAAAAAACCCTGTAATAAAAAGGAACAGAAAGCGAAAAATCCTTCAAACAAAAAGCATGGCAGAAGAGGAAGGCGAGGACGCAAAGGAAAAAAAGGA…	TTCAGGACCACAACCATGAACC	CTACCTTTTCTTTCTTTTCGGCAC	430	4.82	9.58038e-37	0	0	2	186	108	176		none	none	Adhesion	Yes
Mile-ap3b	MK854814	Mii103283_c0_g1_i1	AGAAAGGGAAGGAAAGGCAGAAAGGGTCGTAATGGCAGAAAAGGACGAAGAGGTCGTAAAGGCAGAAAGGGAAGAAAAGGACGTAAAGGAAGAAAGGGAAAGAAGGGACGCAGAAGGGCTGACAAGAGTGGACAAAGGAAGGGCGGAAGCAGTGGTTCTTCGCATAGTAGTGAGGAGGAATATTATGAGGAATGGGAGTACTTTACAGAGAAGCCGGTTTATGAAGAATACACATATTGGGAGTATTTCACAGAAGAGCCAACGTACGTGACCTATTGGATTCATGAGTAATAAACTTTGTGTGAATTTCTAAAAGTTTAAATTACAATGACATGTTAATCAACCAAAATTCCTTTAATTTTGACTATATTTCAAACATTTTAGTGTATTTTAGTTTGT…	AGAGGTCGTAAAGGCAGAAAGG	TGGCTCTTCTGTGAAATACTCCC	516	6.35025	1.33121e-67	0	0	0	531	336	410		none	none	Adhesion
Mile-ap4	MK854815	Mii51329_c1_g1_i1	GTCACCTTTTAAATCATTTATCCAAACTATGGGAAAATTGTTTTTTCTAACTTTTTTTGCCTTTAGTATTTGTAATTATGAAGTATTTTCCAGTAGTTTTGGCTTTAAAAATGCTACAGGTCAATATTTCACTGTAAACGGAAAAACGTACAAGATACTTCAGAAGACGGAGCACACGAGGAAAGTGGAAAAGTGCATGGAATGCAAAATACAACCCGGAATCGACCAGTTGCCACAGCCACCGGCATTCCCACCTCCACCAGGTGCACCTCCAAATGCAGCGCCGGGAGTTCCGCCTCCTCCGAGTTTAGGTGGTAATAATCCTCCTTCACCTCAAGTACTTGAAAGCATCTTGAGCTTTCTTTCCAATCCAATAGTCTCTTGCAGAAAAACGTGTTG…	CAAGATACTTCAGAAGACGGAGC	CACGTGGATAAAAGTCAATGGC	609	4.70946	1.55586e-31	0	0	0	118	96	124		none	none	Adhesion	Yes
Mile-ap5	MK854816	Mii58307_c1_g1_i1	TTTGTATATAAGGACAAAAAAATCCCTTCAAATACGCGCTCTTTCAGACAATTTGACGATTTTATAACCGCCTCTCGGAAGATATGAACACTACAGTTTACCTCGCGTGCTTTCTCGTTTTGGCTTACAATGTCGACCTGTCAGTTGGCAGCAGTTGCAACGAAATTAAGAAGAGCGACCTACAAGCTCATACCACCAATCCCGACCTAAACAATCTCCACTGTGAACAAGTGCAGCAGGCCTACTATTGCGTCAAGGAGGTATCCGCTGTCGGTGACTTCTGTGTTGTCGAGGAGTTTGGTGACAAAATCGCGGGAGCACATGTGCATTGCCCATCACACGCCACTAAATTGTCCTTAAACAGTTGTGGAAGTCCCAGCAATGATTTCGGCATGTTCT…	CGCTCTTTCAGACAATTTGACG	CAAATGACCAATCTCCTCCTGC	609	5.28381	1.18953e-58	0	6	2	324	260	366		none	none	Adhesion	Yes
Mile-ao1	MK854817	Mii68564_c0_g1_i1	GAAGATTGTTCGTGATTAAAGAGAAACTAGATAATCTCGATGGCTATGAAACATTTGGGTTTCTTGGGTCTTCTGTTCATTTTCATTACATCCAATGCGGAATCAAAAAAAATGGTATAATCGAGATTACGATGCATTTGTGAAAATGCAAACACTTATCAATAATGAAATAAAGAACAACAGAGCTTACGGTGAAACTCCAATAAGTTTTGATTTTTTCATCCACGGAATACAAGCGAAGGCAACCTCAAGCAAAGAATATTTATCTAAAAGTTATGGTCCAAGCGAAATCAGCCCTTTAACGGGAAGAGGCCTGTTACTTAAAGGTGTAAAGGATGGCAAACCCAAAGGCCAGCCTCAGTTGATAAAACTCATGCTGCCCCGCACTCCGGTCGATGT…	ATGAAACATTTGGGTTTCTTGG	TTGGACACTTGATGCTTATTGG	1178	3.93973	1.76318e-24	1	2	1	88	81	96	0.061	PREDICTED: uncharacterized protein LOC109481132 [Branchiostoma belcheri]	LCCL Domain (2.97e-8); DUF 3381 (5.65e-03)	Adhesion	No
Mile-if1	MK854818	Mii69030_c2_g1_i1	ATTAATTAAAAATAGTTTTACATTTATAACCAATTAAAATAGTCAATAAAATTAAATATGTGTATTTATGTATATTATTTAAAAATATATTCTAATAATAAATAGACTAAAGGTTTGTATAACAGTCTTTAAAACTACGAAACATTTATTTTGAGACCAGATATGTAAGTTCTGATTTCACAAATTAAATAGAAATAGAATCTAAAACGAAATTAAGAATGTCATAACAACGGATATATAGTAGCTCCTCCGTACATTAATTGGATTGATAGACAGTTCTCTGTGTGTGAGTAGCTTTCTCCTCTCCGTCACTACTGATGAGAACTGTGTGGATATTCGCGCCATTTCCCCAAGTGTTCTCATTGCATTCCATGTCAGAAGAGCCAGGAGGTTTGAGAC…	GTGCTCTCAGTTCTGTGAATGG	ATTGTAGTGCGTCTCCATCTCC	2149	5.73561	5.35967e-82	1	6	4	619	459	461	0	intermediate filament b-like protein [Macrostomum lignano]	Intermediate filament protein; Lamin Tail Domain;	Adhesion	No
		Mii74868_c2_g1_i2	CACTTAATTTTAATCAGAATTAGAAATATGAGAGGAATTTCTTTTTATATATACGTTGTGATTTTTATGGTATTTCTTCTGTTTGGGCGTTCATTGGGAGGAACAACCGTAGGTCACCCAATATCCTGCATCATCACTGACAACATCAATTATTGTAGGGATAAGCCTACTGGACTCAAATTCTACGATGGTTGTCGTGTCTGTACATGTAATGCCTATGCCTCACCATGCCAGAAAACGTCGTGCAAACTCTTCGTATCAACCTATCAAGAGGCTGCACAAAAATGCTTGATCGTGGAGCGTGTGAACACAATTTTTCGGAAATATTTTGAAATGAGAAACGGTAAATTATCTCTCTTGAATATGGAGAAAAAAATTCTGCACTATCGAGAGCATTCC…	ATCAAACGAAAACACCGACTCG	TATTGAGTCTCCGATTTTGGCG	2620	6.33719	1.91945e-77	1	0	2	483	520	592	0.0001	hypothetical protein CSKR_4853s [Clonorchis sinensis]	none	Female pore related	Yes
		Mii65894_c0_g1_i2	TAGTTCGATGTGGTGGTCAACACGTCGTCTAATTTTATTAATTGTAATTTTGGCTCTGTTGATAGATCTCAGTCATGAGCAAGAGTCGAAGCGGAAAAGGAAAAGAAGAGTGGTTAGCTGCAAATATAAATTGAAGAAGATTTGCAAAGCTTTGAAGAATTTTAGTTTTCAGGACGAGTGCCACTATTGTTATTGCGAAGGTAAGAATGGCTTCTGCAACAGAAAATATAAAAACTGTAAGGTCAGTAAGGAGGAATGCAAACAGGTCAAGCGAAAAATTGAGTACATCATGCTAAGAAAGAAATATAGTACAGTTGACATAATTAAACTGATGAAGAAGGCGATAAAAGCAGCGAAAAGAGTTTTAGGTGAGGCTAAAAGGACAGCAAAGGCTTTGAG…	AGTCATGAGCAAGAGTCGAAGC	CATTCTGTTAATTGTTTGCACTGC	613	5.68042	4.41581e-47	0	0	0	235	224	276		none	none	Female pore related	Yes
		Mii62479_c0_g1_i1	ATAGATTCGATTTCAGGTGATATTTCCTTTCTGTTTGGAAGAGTTCTGACAACTGAAATGGAGACCAAATTGATTTTGTTAGTGATATTGGTTGCTCATATTTCCAGTGCTACGAGAGAGCAAAAAGTCGATAAAGAATGGTGTAAAGAAATTTCAAATTTCATCAATGAAGAAGGAGATCAAGAAAAAATCATGAGAGTTATAAGATATTTTCTTCATCTACATGACGAGGATTTAATTGGAATAGATAAGAAATTCGATTCCTGCCTTAATCAATATCCTCGACGAATGAAAGCTGCGAAAGAGTGCAGACAAGCTGTAAACAAAGTTGTAGGGGTATGCGAATCCTCAATCAAACTGGATAGGAATTGGTGCCACCAAACTGCGACTAAAGTTGGT…	TGGTTGCTCATATTTCCAGTGC	CCAACGAACAATTTGATACTGTCG	815	4.70918	6.8252e-33	0	0	1	104	127	158		none	none	Female pore related	Yes
		Mii38493_c0_g3_i1	TCTATTGCTGGCGGTCAAAATCAGAGCGCCTCTAAGTTTTTTAGTCACTAACGATCAAGAATATGAATTCATATAATCTAATCTGCATAGTATTGCTGCTAATGGAAGGAGCTGGAAGAACAGGAAGTTCGTCAGACAATCGGTGCAATACGAATAAACATATCAGGATGGACTTTGCCCCCTTATCTTTTAAGCCAGTTTGTCGGCCTCTAACTGTAAAAGTTTATTCTAAGCGGACTATCGAGTGCGATTGTTCAACCGAGGAGTGCCGCCTCTCCGACTGTCAGACCATCCTAAATCGCACCGCCTGTGTCAAGAATTGTCAAACCGTTGATCGTGTCTGCCCACAACCAGCTTATTTCTATGTCCATTTTTATTCTCTCAGATTCGGGAAATGTA…	AGGAAGTTCGTCAGACAATCG	AAGTCTCTCATAATGCGGTTCC	567	3.88792	6.35797e-20	0	0	0	56	63	58	0.0008	hypothetical protein MS3_08563 [Schistosoma haematobium]	none	Female pore related	Yes
		Mii59862_c0_g1_i1	TCTGAACATAATGTCTAACATTTTCTTGATTCTGTCAGCTCTACTTCTTGTAACACCGTTTGTACATCCGGCTGAGAAAGAATGTAAATTCCCATTTAAGTTCGAGGGTAAAACCTATTACCGGTGCGCCCCAAGTGATATCTATGTTGGATATAGCTGGTGTGCTTTTGATGATAAATATCAAGAGGACAGATGGAAATACTGCTCCTTGGATCTCAGTGATAATCAATCACCTTGCAAATTTCCCTTTAAATATCAAGGAAAAGAATACGACGCTTGTGAAAAAGGCACTTTCAATAGAACCTGGTGTTCTACAGTGTCAAATTTAGGAGAAAACTCAAATGATTACAGATACTGCTCGGGGCCGTGTGTATTTCCATTCAAATATAAAGGGAAAAC…	CAGCTCTACTTCTTGTAACACCG	CGGCCATTGTTCACTTTTAGCG	821	6.31621	2.26772e-90	0	3	4	619	686	667	6.83175e-22	PREDICTED: matrix metalloproteinase-9-like [Chelonia mydas]	3 x Fibronectin 2 domain (1.7e-15,1.04e-11, 3.33e-10)	Male copulatory organ related	Yes
		Mii70702_c0_g3_i4	TGGTCATCGTACAATCACTTACACAGAATTATGTCTCTAAAAATGACGAACATTTTGCTGTTATCAATACTTGTTTTTCTGATGATTAGTAATCTTGCCATGACGAATGACAATAAATGTAATAAATGCATCAACGAGATGTTAAAGGCATACAAGAAAACACAGCCTTTAATAAAAGAACCCAAAGATGCTGAAAAATATTGTAAAGATATTTGCGAATTGGCAAAAAAATGATAAACAAGCGTTATGCAAACAATATTTTGACACAGAGTATAAGAAAGTAGTCAATAATGTTGTTGCCACTAACAATAAAGAGATACCGAAAGAATTCTGTACGATCGTGGGCATGTGTGGTAAGCCTTCTGGACCTCTCTCATTGTGTGAAAATGTCTTCAATGA…	TGGTCATCGTACAATCACTTACAC	GGTTTCCGCTGATCTTCTGG	502	5.43189	1.08364e-47	0	0	1	213	223	219		none	NADH dehydrogenase sub 5 (9.2e-3)	Male copulatory organ related	Yes
		Mii69809_c1_g1_i2	CTTCCGATCTCTACTGTTGAATTTTACAAATTTTATGCGATAATACAAAAAATGATATCTCCAAAATTAGTGAACATCTTGCTGGTGTTAATACTTGTTTGTTTAGTGATCAGCAAAAATATTGATAAGAATTACATGAGTGTTGAAGATACTTTATGTAAACAATGCAGGTATGGTTTAAATTTTTTAACAAATTTTGCATTTAACCGTTGGAATGCCACCTTGGTCGGAATTATTAAAAGCAAAATTTGCTGTCCATTGGAACAAGATGATGAAGCGGCAGCATGCAGAAAGTTTGTACAAAGCGAATTGAAAAATTTACTGGCTAATGTAATTAAGAATAACAATGGAGAGATAATAAAGGAAGGGTGTAAATTGTTTGGACGTCACTGCATTACG…	CCAAAATTAGTGAACATCTTGCTGG	TCCTTCACAGTCTTCAATGTTCG	787	5.15261	2.43531e-50	1	1	3	242	230	244		none	none	Male copulatory organ related	Yes
		Mii53816_c0_g1_i1	ACTGGAGTTCAGACGTGTGCTCTTCCGATCTCTTGAGTTAATAACGTCATCTATAATGACTGCAATCAATATTGCAGAAATCACTGGCGAATGGGAATGGTTTTCACGGTCGTTCTGTACTTTCTGCTCTTGTGGAAACTCTTAGTTACAGAACTTTCAGTGGTGCTTGGAAAATATTCATCAGAAGGTTGACGATCAAAACTCTTAGTTACATATCTTCCTGGGAAGCCGAAGCCTGTTGTGAAATATTCATCAGAAGGTTGACGATCAAAACTCTTAGTTACATATCTTCCTGGGAAGCCTGGGCCGAAGCCTGTTGTGAAATATTCATCAGAAGGTTGACGATCAAAACTCTTAGTTACATATCTTCCTGGGAAGCCTCTTGGAAAAGGTTTACGT…	GCTTCTGTTTCTCTTCTTGATTGG	CAGAACTTTCAGTGGTGCTTGG	630	5.40838	1.75748e-73	2	5	5	429	423	404		none	none	Male copulatory organ related	Yes
		Mii71136_c1_g1_i4	CTCTCAGTTAATCTTGTTGCATCAATCACATACACACAGAATAAATCTCTAAAAATGATGAAGATTTTGTTCGTGTCGATACTAGTTATTTGTTCGATCATTGACCATGTTACCATGAAAGATTCAGCAATCTGTAAGTATTGTCTTAGGGACGAGAAGGAACGTTACAAGCAAGTTAAATATATGAACTCCTCCTTCATTAAAGATAACAGTAATAGAGTTTGCGCTAAATTGAATCCTGGTGATAAATCTGCATGCATCAAGTTTTTTGAAACTGAATTTAAACCAATTAGTATGAAAGTCTATGAAGAAAATAAAGAAGAGATATATCGGGATGGTTGTGAGAAGTTTAATGAATGTGAGTCTGGTGACAAAACGCGATGCGAGAGTATTCTCGAT…	ATGATGAAGATTTTGTTCGTGTCG	GGATGCCATATTTTCCTTGCGG	710	4.97213	3.9016e-40	0	0	2	169	158	173		none	none	Male copulatory organ related	Yes
		Mii109492_c0_g1_i1	GTATATAAATGTGATGACATTTAGACTGAGATTTAGACAATTCTCCTCAATTTGAAGATATCATTATCCATTTGTCGTGTTGAGAGTTCCAGATGTTACTTCGCTGGATATTGTTGGCCATACTTGTAATCGATTGTAATTGTATAGACTGGAGTAAATGGAAAATTCATCCCCGTTGTGTTTATGTGACCAGAAATCGTGATAAAACTCTTTCGATTGGTTGTAATTATTATGGCGATGAATGGTTTCGAACACCTTGGTGTTCTCGGGACAAGGTATACAATGGGCGATGGGAATATTGTATACCTAAATAAACGATAGTACTGAGCTGTTGTTTCATAAAAGATTGTCATTATGCACACAATGTAATCAAATAAGTAAATATTTTAATTTATAATG…	ATCCATTTGTCGTGTTGAGAGT	TGTTTGACTTTCAGATAATAGGCT	480	4.9267	1.35708e-38	0	0	2	139	160	209		none	none	Male copulatory organ related	Yes
		Mii65395_c0_g1_i1	TTCCGATCTCTCTACTGTTGAATTTTACAAATTTTATGCTAATCATTTACAAAGAATAATGTCTGTAAAGATAATGAATACTGTGTTGATATCAATACTGGTTTGTGTAATGATCAACGATTATGTTATCATGTGTAATGATACTGAGGAATGTAAAAAATGCTTGAATAAAAGGGAATCATATTACAATTCTTCGTTACTGGTCTTGAAAAGTGGCAAATTTCAGTCACCTTGCCCTTCAATTAAAGATGAAGATGCAAAAACAATCTGCAACAATTTTATGAATATCCAACGGGAGGAAATATTTGTCAGTTTAACAAAAAATAATAATGGAGAGGTTGTATACAGAGATGACTGTGAGTTTTCTGGATTTTGTAAAGGAAATGATGATCAATATTG…	TGGCAAATTTCAGTCACCTTGC	AGCGCATTCCTCATCAACTAAC	1135	4.86131	4.55807e-43	0	1	4	184	184	220		none	none	Male copulatory organ related	Yes
		Mii52575_c0_g1_i2	CAACCATAAATTCGGCTCCAATGATTATGAATATTGCTCAGGGCCGTGTGTATTTCCATTCAAATATAATGGAAACACTTATAACAGTTGTACATTTGTTGATAGTAATGAACCAATATATGGTTGGTGTTCACTGACTAAGGAATACCGTGGTTACTGGAAATATTGTTCAGGGGTTGAAAATAAAAAATGTCTCTCAAAATGCCAAAAAAATGAAAAGTGGCCGCTTGGAAGTTGCACAATTTCAGATAAAGAGGAAAAATTCTGTAATACAAAAGATGTTGAAAAATGAGGAGAGAATGTCTAAGAAGACATGCGTGTGTGAATACAGAATCAAATTAACTGGTGTTTGTGAACATGACGCTTTTATTTAACTTTTATATTAAAAATTAAATTTAT…	AATTCGGCTCCAATGATTATG	AAAGCGTCATGTTCACAAACAC	454	4.58413	1.06091e-45	2	5	4	212	194	260	1.49238e-07	PREDICTED: binder of sperm protein homolog 1 [Ochotona princeps]	Fibronectin 2 (2.46e-14 RF+2) DNA polymerase III (3.02e-04)	Male copulatory organ related
		Mii58412_c1_g1_i1	TGATATTGACTGCAATTTTGAATATAATTGGATTGTCAAAACTTATCGAATCAGCACTCTGCTGTCGAATGTTGCAACAACTTCAAGATTTTCAATCAATGAATTGGGAGATAATGACGAACCAAATTTCGAAGAAGACAATTCTGAGTTTGAAGCTCGTCTTGAAACAATATCAAACGATAAATATTTGGTAACTTGTACACACACTTACTCTGTGACTAAAAGTCAACAATTGCATCAAATATTCAGAATATTTCCAAACGGAACAAAAGTCAGATTGTTGATTGATGAAGCGAGTATTACGGGAACAATAACTGTGAATAATGACTATGTTTGGATCAATTTCGGACAAGAGTTCAAATATGACGATGCATATTTTAAAAATCGATTTGAGTGCAG…	GATTGATGAAGCGAGTATTACGG	CTTAATTGACAGCAGACGATGG	860	4.57131	3.8644e-32	0	2	0	123	109	129	5.14824e-07	microfibril-associated glycoprotein 4 [Tachysurus fulvidraco]	Fibrinogen related dom. C (2.54e-10)	Male copulatory organ related
		Mii74274_c4_g6_i1	CTTCACTCCAGACAATCCTTCCGAATTTGAAGAGAATATTCTGCCTCAGTTAGTCGTGTTGCAATAAATCACTACTAAACATGATGCTTTTCTTGGTGACACTACTGCTTAATTGTTTTTACTTGATCGACGTACAAGCCGATCAATGCACTTATTGCCTGGATGACGTGAAACAACTCTTCAAAACTTTAAAGTATAAGAATCAGTCCTATTTTGACGATATTAAAAAAAAGGCATGCTCTCCATTACCGTTAGAATCTGATGAAGTGTCATGCGGCAATTTTCTAAATGATGAATTTAAATCAATTGGAGCCGACATTTATGACAAAAACAGAACAGCTGTAATGAGAGATGAATGCGAGCTCTTAAATGAATGCAAATCTGGTAACCCACAGAGAT…	GCTTTTCTTGGTGACACTACTGC	TGCTGTGACATTTTTCGATAGG	820	4.50788	2.1028e-34	0	1	3	141	135	135		none	none	Male copulatory organ related	Yes
		Mii76738_c4_g3_i1	TTTCAGTATTGATAGAATTTTAATTCCTAATTCATTTCAGATAATAATGGAGCTTCAATGTCATCTGCTGCTGACATTTCTGTTTCATTTCTGTTCCCAAGTGTTTGCTGAAAAGTCACTATTAAGTGTTAACATGCCAACAAGACTAAGTTCTACAAATGCAGAAGGCGGATATTATTCTTCATTGGCGGTCGATAATAGCACTTCTCAACGAAATCATGTGAAGAATGTCTGCGCCCGAACAGATTACGGTAAAAATCCTTGGTTAGAAGTGTATCTGCTAGGTATTGCTCGCATTACCAATTTGATTATCTACAATGGTGACTGCTGTGAAGAGCGTCCGGATGGATTCGGAATATTCGTGTCAAACAGCACGGAGGAAAAATATTCTTCATGCTT…	GGCGGATATTATTCTTCATTGG	GGAATCCATTTAGTCGCTCTCC	1002	4.49159	1.84766e-35	0	2	3	145	143	146	3.35664e-28	FBP32II precursor [Morone saxatilis]	2 x Coagulation factor 5/8 C-term. Domain (7.84e-13 3.85e-7)	Male copulatory organ related
		Mii47850_c0_g1_i1	CTCCTCTGCCTCAATTTGAAGATTCTTATCATCAATCAGTGAATTTGTCTTGTTGAGAACAAGTAAAGAACAAGTCTCCAAAATGATGAACATTCTGTTGGTGTTGATAGTACTTATTTGTTCGATCGTTGACTTCGCCACCATGACAGATTTAAGGTGTGAGCATTGCCTTAAAGACGAAAAGAAACTTTACAGTAAAATGAAATCATTGAACGCCTCTTTCTTCGACTCTAACCGACATCGAATTTGCTCTAATTTGACGAGTTCAGATGATGAAAGGGCATGTATCAATTTTTTTGACACTGAATATAAACGAATTGGAATGAAAGTCGATGAAGATAATAGAGATGACATAATGAGAGATGGTTGTGAAAACTTCAATGAATGTAACTCCAGTGA…	GTGAGCATTGCCTTAAAGACG	TGTATTTGATCCAGCTTCTTTGG	742	4.47511	2.26302e-30	0	1	1	105	100	144	4.83315e-07	CG6788, partial [Drosophila busckii]	Fibrinogen related dom. C (3.16e-16)	Male copulatory organ related	Yes
		Mii65211_c0_g1_i1	ATAAAGGAGTTTAAAATATCATCACAATATTGCTGAATACCCAATTCATAAAATATGTTGGTTTTACATCTCTTGTTGATATCACTGACTCTGTTCCATTTCCCAATACAAATTGAAGGTGATAACTATCTGCTGTCGTACTACGGACCTGCAGAACAAAGTTCAACTTTAAATGATTCAGTCGCAACGTTTGCAACCGATTATTCACACAGAAGGATCTCCCAAACAAAAATTAGTAAAGACCCCTGGTGGCAATCGAATCTTTATAGACTCGCCCGAGTTAGGTATGTGACAATTGTTATTCCACGGGAAGATTTGAATAATTTTGATGAATTCACAGTATTGATGAGTAATTATAGTGACCAAAGTTTCACAGAATGCACATCTTGGAATAAAAAT…	TGACCAAAGTTTCACAGAATGC	CAGGATCTTCTCGGGTAATACG	2019	4.44784	1.00147e-46	0	9	5	219	226	227	3e-30	hypothetical protein BOX15_Mlig000828g6 [Macrostomum lignano]	3 x Coagulation factor 5/8 C-term. Domain (8.22e-9 6.76e-6 1.16e-3)	Male copulatory organ related	Yes
		Mii42458_c0_g2_i1	AAGTGGACAGACAATAAACTGAATCTCTTAAAGCTCTGATGATCACTATATAAGTGAGTGCTTCTGACAAGAAATACAATTTCAATCATTCATCAAGACCAACCAATTTGAAATTGAAAATTTTCTACAGTGGTAAAAATGAATTTCAAGGCTGTCATTCTTATCAGTGTTCTACTTGCTATAGTTCTGTTGATTGATATGGCTGCTACGAGCTGTGCATCGGAATTCGAACTATGCAGTGATGAATTTCCATGCTGCGAAGGTTTAACGTGTTTTAATCAGGGTTCTAAAGAAGTTTGTTTAGTAAATTGAAACAATGCAATTTACTATTATGAACACACACCACTTTCACCTTATATGTATATAACTTATGTACTACTAATTAATTAATATACTAAT…	CAATCATTCATCAAGACCAACC	AAGGTGAAAGTGGTGTGTGTTC	426	4.43163	1.10233e-29	0	1	1	93	119	123		none	none	Male copulatory organ related	Yes
		Mii79211_c2_g1_i3	TCGGATGTGACCAATCTGAAGTGAAACGTCTCGACAATGGTGAATATTTCGTGTCTTGTCAATCCTACGGTAGTCTCATTATTATGACTAACAAACAGCTCCAATACAGACTTGAAAGTGTTCATGGAACTAAAGAAAACATACCAATTTCATTCTATAAAAATGTTTACAGTCAACCTTCCTCAATAGAAATCCCCGATTTTGTAAAAGGAGACATACGATTGAGTCCCACCAAAATGAATTACCAAATTGAAGTGAATTTATTTTTGAACTACAATGTAGAAAGTGTAATAGCTTATTTGGACATGACAACGTCTTCAACAAACAAGACGGATGTGGTGCTGCAATATGTCACTGCTTATGTTAGAAATGCTGAAAATAATTCCCAGAAACATTGTC…	TCAACGTCCTTTGATACAGTGG	AGTCAAAATTACCGTCGAATGC	3013	4.42157	2.9779e-44	1	10	2	201	204	218		none	none	Male copulatory organ related
		Mii67781_c1_g1_i1	TTCCGATCTTGAAGATACATATCTCTCAGTTTCTTCTGTTGGCAATGGACTGGAAAATTTATTATCATACTGTGATCATACTTCTGTGTATTGATTTCGGCTTTGGCTCTGTTTTCTGTCATTGTAAAAAATATTTCTTAGAAGGTGTTCCCCAATGCAGTAAAAATGGTACCATCAGAAGTCCCACCAATTTTTGCAGAATAACTTATCCAAATAAATGGACTAATTATTCATACACTCTTCGAGATTATCCTTGGCCTAATGAGATTGCTGCTGACTGTCCTCAAATCAGCGGCGTGTGTCAGAATCATTCACGCGGATCTTTTTGCTGCTGTAAGGGAGAGTATTGCAACGAAGACATTGGTTCCTTAAAAGTAATTCCACATGTTATATCAGTCA…	AGTTTCTTCTGTTGGCAATGG	TAGCATGACCTGTTTTCAGTGG	876	4.34004	1.56628e-48	3	7	7	241	221	251	1.05598e-10	PREDICTED: thrombospondin-1 [Stegastes partitus] >gi|657526155|ref|XP_008283041.1| PREDICTED: thrombospondin-1 [Stegastes partitus]	Thrombospondin-1 repeat (1.03e-18)	Male copulatory organ related
		Mii67076_c1_g1_i1	CCGATCTCAATTACATACATTAGAGACGAGTGTGTCTTGTACCATCACAGCTACACAGAATAATTACGTATGTCTCTGAATATGATGAGCATTTTGTTGGTGTCAATACTTATTTGTTTGATGATCAGTGACCATGGTATAACCAATGGGACTACCAATTTATGTTCGCAATGTCTTCAAAAAAGAAATCATACTTGGGAATCATTTAAAGATCATAACACCGCATATTTTGAAATGTTTCGAAATTCCATTTGTCCTCTATTACCAACAACAAATGAACAATCCATCTGTCGTACTTTTGTCATGAATGATTATCGACGCCTATTAAATCATACAGATGCAAATGACAAAGCAGAGATAGTAAGAGAAGAATGCGAGTTCTATCGCAGATGTGAAACT…	GAATATGATGAGCATTTTGTTGG	TGAATTCATTCGTTCACATGG	870	4.62376	5.54011e-38	0	2	3	176	133	176		none	none	Male copulatory organ related	Yes
		Mii74845_c3_g1_i3	TTATTTACATACTTTAACATACTTAACAGAGACTAGATCTGCATTATATAAATTATCAAGAAGAAAGATACAAAAGTTTGGCGTGACTTTTAAATCAATATTATTTCAGACATGGAAATTCTGCACTTGTTCCTGATATCGTTGACTTTATTCCATTTCTATTTACAAGTTAAGAACGATGAATTATTATCCGAAGGCATGCCAGCACAACAAATTTCCACTTTCAATGACTCCGTCGCCTCGTTGGCTGTCGATGGTGAGCATTTGTCGGATGAATCCTGCTCTCAGACAACAGAGATTACAAATCCTTGGTGGCAGGTGTTTTTGCAGGGTGGACTTGCTCGTGTTACCAATGTAACAATTTATAGTTCATCCGGGAATGATTTGGGTCAAATCAAA…	CAGTGGGACATGAAAATACTGC	CTGCACTTTTTGTTGTGAGAGC	1959	4.23622	2.14576e-25	0	1	0	89	69	102	1e-34	II-FBPL precursor [Xenopus laevis]	3 x Coagulation factor 5/8 C-term. Domain (2.96e-11 3.72e-5 4.33e-5)	Male copulatory organ related	Yes
		Mii79949_c1_g1_i3	ATTGACACATGTCGATTAATGAGAACAAATTATGATTGTATTATCGTACTTTCAATATCTGTTTGCACTGCTGACATTCAGCTTATTGGTACACGCATCAGTTGGAGCTACGAATTCAAATGAATCAAGCACGGAAGACGCCTACCTGCCTCCTTCAGAATATGAAGATTTTTATAAATTGAAAATAATATTAATAAGTGACAGAGAGTTTGATGACATAGAGAAGAGATTCGAAATAATTTCTATCGCTCAGAAAAAATATTTTAATAAAGTAAAGACGAAGCTAGTGATAATCGCCTATGACAGTGTCCAATTGTCCAACGATAGACAATATTTTTCTTTGAGCTATCATATTCGAAGAAAATGGATGGATAACGTGCGATATGACTTTGGTATTTT…	ATGCAAATCTATGTTGGACACG	GTCCCGTACACCAATTGTAAGC	5442	4.23265	3.4144e-134	24	65	30	1006	1105	1056	2.8355e-12	PREDICTED: disintegrin and metalloproteinase domain-containing protein 18-like [Colobus angolensis palliatus]	Disintegrin homolog (8.42e-16), Ca-EGF (3.19e-4), Fibrinogen related (2.49e-15)	Male copulatory organ related	Yes
		Mii62612_c0_g1_i1	CTGTTACACATACAATTATGGAGTTCTTACGTCTGTTGCTGATATCGTTGACTTTATTACACTTCCCCCTGCAAAGTAGAAGTAAGATATTGTCTAGAAAAAGACCTGCAGAACAAATTTCCACCTTGAATGATTCCGCTGCTTGGTTGGCTGTTGATGGTATTACCATATCTGATAAATCCTGCTCGGTTACAACAAAGATTAGAAATCCGTGGTGGCAGGTGCATTTAATAGATGGTCTTGCTCGCGTTAAAAGTGTCAGAATATTCGGTTCAGCTAAATATAGAAATGACTTGACTGGAATTAAAGTATTTGTCTCCAACTCCACTGAGCAAACTTTCACAGAATGTGCATCGAGGAATGGGACTATATCAGATGTTAAATCTCTCTATTTGAAAT…	AGCAAACTTTCACAGAATGTGC	CAATTCTAACACGAGCAAGTCG	1541	4.21479	9.2415e-29	1	2	1	101	105	122	8e-24	hypothetical protein BOX15_Mlig003756g1 [Macrostomum lignano]	Coagulation factor 5/8 C-term. Domain (2.56e-4)	Male copulatory organ related	Yes
		Mii68974_c2_g1_i1	TACTGTTGAATTTTACAAATTTTATGCCATCATACAGAATAAATACTATGTCTGTAAAATTGATGAATATCTTGATATTGGTGTCAATACTTGTTTGCTTGTTGGTGATCCGCCATGATGCTAACGGTGATAGCATAACTGCTGAAGATACTACTAAATGTGAGGGATGCATGACAAACTTAAATGATACAACCAATTATGCACTTAACATTTGGAATGCCACTCTCGTCATAGAAATCCAATCTACTCTTTGCGCTCCATTAAAACAAGATAATGAAACTGAAGCATGCAACAATTTTGCACAAAGCGAATTGGAAAACTTACTGGCCAATGCAATTACAAATAACAATGAGGAAATAATGAGAGAAGGATGTCAGCTGTTTGGACTGCAATGCAATA…	GCTAACGGTGATAGCATAACTGC	TCGTTAATGTTTGATTTGTCTCC	1145	4.20664	8.37491e-30	0	1	4	109	145	114		none	none	Male copulatory organ related	Yes
		Mii49727_c0_g1_i1	AATATTAGAGCAAAATTATATTGATGACAATCAGATCAATAGAAACTTATTTTAACGACGAAAAAATATTACTGACCAAAATATGAAGATAATTGTGACAATAACTTTGGTTTGCTTGGCAGTTATTTCAAATCATTTGACTCACAGCGCATTGAATCAGACGGACAAGCAGATAATACTGAATTTGCACAACTATTATCGCTTCAGACTAGCCAATCAGAAGACACTCCAGCCAATTCCAGCTAATATGCATGTGCTGCGATGGAGCGAGGAATCAGCCGAGATGGCTCAACAGTGGGCCGATCAGTGCATATACAAACACGATAAAGCGAATAACCGCAAGTATGGTGATTATTTCTATGTGGGTCAAAATGCAGGTGGATTGAGAAATAGGAAATT…	TTGTGACAATAACTTTGGTTTGC	AAACAATTAAATGTCGCCATGC	873	4.14628	4.72828e-33	0	5	4	126	152	156	2.12712e-27	GLIPR1 protein 1 [Echinococcus multilocularis]	SCP like extracellular protein domain (1.74e-38)	Male copulatory organ related	Yes
		Mii60536_c0_g1_i2	CTCTTCCGATCCACCTTTTCTCAAAAAATGTATAAAATGATCCCAGTCTGATAGAATTGAATGCTTACCAATTGAGAAGTTCATGAAACTTTAGTTTGCCTGACAATAAAGATTAAAATATACGATGAAAGTTGCTTGTTGTTTGCTGGTACTGCTTTGTCTGGAAATAAATTTCTCAAATGGGATTACAACATGCCGCCGTCCAACAGAACCAAGCCAATACAAAGGAGTTTGTGGCCCCCGTCTGACGCGAACAGTGATGCACTTCTGCAATCATGACTATTGTCCACATGTAACTAATGAGTCCAAGCGTTCTGTCAGTTACCAAGGTCTCAACGACTATCAATCAAAAATAGAAGGAATCGATGATTTTAAGGGGGCCGATGAAATAAACTTCTC…	CTCAAATGGGATTACAACATGC	GCATGTAGGGAGATGTCACG	628	4.05232	2.66029e-31	1	6	3	115	136	185			IIGF_like family, insulin_bombyxin_like subgroup (8.59e-7)	Male copulatory organ related	Yes
		Mii62146_c0_g1_i2	ACAACACTACTTCGCATATACTGTGAATGTTATTTATATTCACACTGAGCTTTAGACAATCCTCTTAGATTTGCAGATATCATCATCCATTTTGTCGTTTTGGGAGTTTCAGATGTTTCTCTGTTGGATAGTGTTGGCTATAGTCGCCTGTAATTGTAGTGGAGGAAGATTGGATGACTTCAAACCTCACCCTAAATGTGCTGCATACTTTTGGCACAACGGTAAGGGGTACTATGGTTGCACTATGGATCCCGGTTTCAACCGAACGAAACCTTGGTGTTCTCTAAATGAGAAATACGACGGAGGATGGGAATATTGTATAGAGAAATATTATTAATGAGCTGTCGTTTCATAACACTGTCATAATTATTTACAATGTAATTAATTTAATAATTTTTT…	TTCACACTGAGCTTTAGACAATCC	TGACAGTGTTATGAAACGACAGC	442	3.9881	2.55884e-28	2	2	3	101	120	127	3e-05	PREDICTED: seminal plasma protein A3-like [Condylura cristata]	Fibronectin-2 domain (5.55e-8)	Male copulatory organ related	Yes
		Mii33835_c0_g1_i1	TCAATTAAAAGTTTTATTTTATAATTATTTTACATATGAATAAGAGACATATAGGTACAGTAATGTTAAATAAAAGATTCATTTCAAAGAGGATTCATCATTCATTGACATTTACCATACCAGAAGCACGTTCTGGAGCAGCACTCAATATCAGCGAAGCAGAATCTGCCCTTCTTATAACATCTAATACATACGCCCTTAGCCAATGTCGTCAACTCGCAGACATACGTACCACAGCAGGGATTAAATATCGTCTTGTCACACGATTCTCCAAAACCTCTGCAAGGAAACAACCACCTTTTTGCCAAATCGAGATTTTTATTTTGTTCATTTTTCTTGTGATTATTTCCTCCTTTATCATTAAGATTTCTTTTGCTCAT	TTTACCATACCAGAAGCACGTT	ATCTCGATTTGGCAAAAAGGT	380	3.95862	1.61293e-23	2	1	0	75	75	106	2.07895e-10	hypothetical protein [Schistosoma japonicum]	UPF0506 (6.11e-23)	Male copulatory organ related
		Mii57348_c0_g1_i1	AACATTCCAACTAATAGAATTACGAGTTACAACTGATTGCTTTGTTCTTCAACATTTTTCAGTTTATGAATAGAAGTAAATATACGGCTGCGTTTACACAATACGATTTTACAGAAAACTCAAGTTGAATAACAAAGTTTTACGACTAGATTTCTTTCTCAACTCCGAAGTGATGATGAAGACTATTATCCACATTAACTTCTATTTATCATTAATCATTATGAATCAATACGAATTCGGTGAATGCTCAAATGGTTCAGTCGCAAATGGTTCACAATTGGACAATCAGAGGCTCTCAATAATAAAGCAAATAGCAACGGAAAGGTTTCAAATTAAGCTCTTAAATTCTTTAGGGTTAACAAAACCGCCCAAAGTTGACAATACGAGCAGTAGATTTGA…	TTCACAATTGGACAATCAGAGG	ACACAACAAAGAAATCCCAACC	1364	3.85672	3.04836e-27	5	11	12	346	376	410	1.53559e-25	inhibin beta B chain [Clonorchis sinensis]	TGF-beta (1.41e-18)	Male copulatory organ related	No
		Mii73551_c0_g2_i7	TACAATGTGCAAACTCCATATGAATATCATTTAGTAAAAAAATGACTAAATTATTTACTGTTAATCTAATTTCAGACTTTCTGAAGTATTGACAGCTGTGAATTCACATTATTCAACAGAAAATAATATGCATCCATTTTTGAATACAAAGGAAATTTTCTTTATTTCCTGCATACTCTCATGTTGTTTCCTAACTAATTTGGCTGTTGAAGTGACATCAGAGAATGTTGAAGAATATTTTAAATTTGAGTTTGGGAAAGCGGATCCACGTTTAAATTTGATACGTTCGACCAGTAAACAGATCACGAAAATTTCAGTGGATGCATTCAATAATACAAGCAATTGTGGAAGATTTGAAATCAGTCATTGTAAAGAATTGTCCACGATACCAGAATATTT…	TTCGACCAGTAAACAGATCACG	ATTCGTTCTCATCATCCTCACC	1442	3.61989	4.87712e-27	3	9	1	126	109	110	1e-08	PREDICTED: leucine-rich alpha-2-glycoprotein [Mandrillus leucophaeus]	Leucin rich repeat (5.95e-3 RF+2), Leucine rich repeat (1.12e-06 RF+2), NADH-dehydrogenase 6 (5.5e-3 RF +3)	Male copulatory organ related	Yes
		Mii64964_c0_g1_i3	TGCAGCTAATCCTCTTGTCTTCTTGTCTCAGGAGTATTATAAAATTATTTTAAATTATTATTATCTAAATTAATTTTTATATTTTAGAAATAATGTCAAAACTGACCCAAGGATTCAACAAGCGTTCATTCGCTTTTTTATTAGTAGTACTTACTGTAAGTTGTCAATTTTTGTTATCAAGTTGCTCAAGTTATCAACAACTTGTTGTTGTTGTCCCTTTCTTCTCAACTCTTCCCAACTCTTGCGCAATCAGTTGCCTTATAGTTTTTCCTCCTTATTCACCTGGTGTAAGGGCGGTGACTACTCTTAATTTGCGCCTTCCTGTTTGAAATGTAGCAGCACTTTGCAATACCTTTGCCAGATTATGAAATGTTCTTTTTTCTCTCTTCCCATTTTGGT…	GTGTCTTTCTGGTCCATTTTCC	AAATTTATTTTCGCCTGTCTGC	1316	4.28042	1.13362e-126	29	43	28	944	902	1021		none	none	Male copulatory organ related	yes
		Mii51987_c0_g1_i1	GATTGAAATTTATTGGCATATTAATTAGCAAGTTATATAACCAACGAAAGTGTGTGTTTATATGTAATAGTAAATTGCATTGTTTTAATTTAAATACATGTTCCTGTACTAGTAGAATCCCCATCTTTATAACACATTAAGCCACTGCAGCATGGAAAATCATCGCTGCATATACCGTTTTCCGGTTCACAGCTCGTAGCAGCAATATCAATCAACATAACCATAGCAAGTAGAACACAGATCAAAAGGATGGCTTTCAAATTCATTTTATACTACCACTGTAGAAAATCTTCAATTTCAAAAATTTGGTTGGTCTTGATGAATGATAGAGTTTGTCAGAAGCACTCACTTATATAGTGATCGGCAGA	CCAACGAAAGTGTGTGTTTATATG	TCTATCATTCATCAAGACCAACC	368	4.06219	5.99607e-23	0	1	0	70	66	91		none	none	Male copulatory organ related	Yes
		Mii62447_c1_g1_i1	ATCCATCAAAACATTTTTTTATCACAAACATTAACACTCAGAATGATGACAACGTGTCGCCTGATTGCAGCGGCTGTTCAGTTGCTATTATTAATTGTAATTATTAATAATAGTTCAGCAACAGCTTCAAATAGATCATTTAACAATCTGTCCGATCGACTCTTTATGGAAATAGGAAAGGAAAAATTTAAACGCAAATTCTTGGATGCTTTAGGATTGAAACAGGCTCCAAAATTTACAGGCAATCCTAACGTTTTATTTGATTCACTGCCCGACCACATTAAACGGCAAGTCGACGAAGCCAACAAAAAAGCAAGACGAGCCGGCAGTGATGATGATAATGATGATGATGAGAAGAGTATAACGGAACGTGTTATTGTCCGTGCAAGACAAATTTGG…	GACCACATTAAACGGCAAGTCG	TCTGTGTAACTGGTAGGAGAGC	1278	4.82781	6.46656e-57	3	8	4	263	331	362	3.49681e-20	putative tgf-beta family [Schistosoma mansoni]	TGF-beta (1.01e-21)	Male copulatory organ related	Yes
		Mii76738_c4_g2_i2	CGAATTCAACTTGATGGAAGTGGTGAGGATCGATATTTGACTTTGTGTGAAGTGAAGGTTCATGGATATTGGATTAAAAAAGATGAATTACTATCCTATAAAGGAATAACAAAGCAAAGCTCCATTCATCATAGTAATCATTATGACTTTAATTCTTACTCAAAATATGCTGTCGATGGTAACACGGATCAACACTGGACGGGATTTTCATGTTCAGCCACAGAAAACTATGGCTACCATTGGTGGCAGGTGCAGATGTATGGACTTGCACGTGTTAAAATTGTGTCAATTTACACAGAAATCGATGGAACATTACCCCAATTCAAAGTGATGGTGGCCAACCGCACTAAGCAAAACTACAAGGAGTGCGCTTCTGGACCTTCTAAAGATTTGAGTGGT…	ACTTCGTAAAGTGTGCATTTGG	CTTTGAATTGGGGTAATGTTCC	644	4.12024	1.5697e-41	0	13	4	204	192	192	1.98e-08	fucose-binding lectin [Trachidermus fasciatus]	Coagulation factor 5/8 C-term. Domain (1.57e-4)	Male copulatory organ related
		Mii61635_c0_g1_i1	ATCTAAAATAACATGAATTTGAAACATTTTCTTTTACGCTTTATTATTGTGTCAATGGTTGCAATTTTCACAGAGTGCGCAAAAACAAAATACTACAAGTCGTGTCAGGAGATAAAAGAAGCAAAGAAAACAAAACTAAACGGTGTTTATAAAATTTTAACAAATCACTCTTCATCATCGAAAGTGATTCGAGTATTTTGTGACGATGACTGGATTGTTGTCCAACGACGTACAGGCGGAAAACAAAGTTTTCAGAAAAATTGGAAACAATACAAATCAGGTTTCGGTAAATTAACAAAGGATTTTTGGTTGGGTAATGATTATCTTCACTTTCTAACCGACTCCAATCATGCCATAGTTCGGTTTGATCTATGGGATAAAAATAACAAACACAAGTAC…	ACGCTTTATTATTGTGTCAATGG	TCGTTCATATTTTCCATTCAGG	777	3.93916	9.11731e-38	5	7	6	179	161	228	2.67528e-43	PREDICTED: techylectin-5B-like [Octopus bimaculoides] >gi|918318323|gb|KOF87219.1| hypothetical protein OCBIM_22017228mg [Octopus bimaculoides]	Fibrinogen related dom. C (2.45e-80)	Male copulatory organ related	Yes
		Mii75533_c4_g4_i1	GACGTGTGCTCTTCCGATCTCTGTAAAGAAGAAAAAGACATGAATTTTCAAGGAATTGCCGTGACATTGTGTCTTTCGTTTGTCATGCAAGGTGATTTGTTAAATAATGGTGTATACAGCAAAGAAATCAGTATAGGCAACCGATCGTTAAAGAAGAGTTCATCTGTGTACTATGAATCCTGCCAAGAGATTAAATCAGCCGGAAATGATGATATAAATGATGTTTATCCAATCTTTCCACCACATGGACCACCAATGAAAGTTTATTGTCAGAATGAATGGATTGTAGTACAAAGACGCACAATTGGAAAGGAAAACTTTGCACGTAGTTGGAATGAATATAAATTTGGTTTTGGCGATTTGAAAAAGGAATTTTGGATTGGTAACGAGAAGTTGCAT…	CCGTGACATTGTGTCTTTCG	TTCATCGTGATCTCCTTCTGC	922	3.88104	2.28677e-92	21	39	25	615	610	621	4.24167e-47	PREDICTED: fibrinogen C domain-containing protein 1-like [Acropora digitifera]	Fibrinogen related dom. C (2.7e-83)	Male copulatory organ related	Yes
		Mii62034_c1_g1_i3	CTTACTTATTTTACAATAATCATCAACTGACTGACTGTCTGTTTGTCCACCCTGCACAATGAATAAAGCTGTCATTGTGTTGTTCTTTGTGATTTTGTGTCTCGCTGTCTACACTTCGGATGTTGAAGCACACAGAAGAATTTCTGGAAGAAGAAGAAGAATAGGACAATGTCGTCCTCTTGGTCGTCGCTGTAGTCGTAGTCAGCATTGCTGTAGTAAATTCTGTCGGTATGGAAGATGTAAAGCACACAGAAGAATTTCTGGAAGAAGAAGAAGAATAGGACGATGTCGTCCTCTTGGTCGTCGCTGTAGTCGTAGTCAGCATTGCTGTAGTAAATTCTGTCGGAATGGAAGATGTAAAGATCTATCGAAATGTGTTCGATGGGGATTTCCTTGTTC…	CACCCTGCACAATGAATAAAGC	CACAAACCATTTCTGGTACAACC	552	3.38189	7.77892e-25	8	7	1	109	113	118		none	none	Male copulatory organ related	Yes
		Mii53135_c0_g1_i1	AAAATTTATTGAACTTATATGAATAATTTTACAAATTTAGTTTTGCTTTATAATGTTTAACAAAATAATACACAAACACGTTCACACACGTATTCATAAATTATAGGTAAATTTCCGCAGAATTTTCATAAAGTCTAACAAAATTATTGTCTTTGTCAATTAAAAACAAAACACACACACCATGCAAACACATTCATATTCATAGATTATAGGTAACTTTCCGCAGAAAACGAGCATAAATAAACTGATAAGGATATCGATCCACAGGAAGAAACAGACGTTCAGGTTTAGTTGATGAAATTGAATCCTCCTTGCATTCACCAAACCATCCGGCAGTCTTGCGTATTACAGCGCAATGCCTCTCTTCGTCATTATCATTGTCCCTGTCAATGGTACTGA…	TACACAAACACGTTCACACACG	CCATGGAGGATGAAGCAAATA	819	3.99496	9.51018e-32	1	3	6	134	133	151	6.35931e-05	hypothetical protein BRAFLDRAFT_218135 [Branchiostoma floridae] >gi|229274587|gb|EEN45421.1| hypothetical protein BRAFLDRAFT_218135, partial [Branchiostoma floridae]	Fibrinogen related dom. C (2.07e-9 RF+2), Fibrinogen related dom. (1.12e-8)	Multiple expression
		Mii67304_c1_g2_i2	GAAGGGTTACGAGACAAGTCGCAGAGATACGCTCATTATCTGCGAGCTGGAAGCGACAGGAAAGAAGGTGCCCAATATGGATCCTTTCAGGGAACCAAAAATGCTCGAATTGGACGATGATTTACCGAAATCCATGCACAAACTGGCGGCACACAAAGCAATTACGCAAAATGTTCATGATGTGGAATTTCATTGGAACACCGTCAGAATACATGCTCTTAGAGATACAGTCGAACCGATACTTTGGATTCCAAAACATCAAATGATCTTTATGGCAGGTGCTCAATTGTCCAAAGGCAGGATAATTGTTATCACTGGATCCGGTGTTTGGAAGAATGTAGAAACACAACCGAATTTGGCCATTACACGTGGTGTTAAGAAATGGCTGGTTGGTAACGA…	GCTCCCTTGATAGATATGACACG	ATACATCATCGCTCCAACAACC	1431	3.88684	9.11194e-21	0	1	0	71	67	57	8.90656e-29	PREDICTED: TRPM8 channel-associated factor homolog [Limulus polyphemus]	Peptidase_M60 like 1.91e-21	Multiple expression
		Mii80234_c2_g1_i1	TCATATGCTCTCCAACATCTGCCGTTTTAGAAGATGCAGACAATGTAGTGAAAACGTGTTATCCTTATCGAGAGAGTTTCTGCCATCCGTTGGCTCTCTGCAACGATACTGATAAAGGAATGGCTTGCAGTTGTCCGGAAGGACTTCTGGGTGACGGTTATGTGGAAGGCACTGGCTGTAAATACAAGAAGTGTGAGTATAATCAGTTCGCGTATCAGGGCTACTGTTACGAGGTCCTGCCAATACCGAAGATCTACGACGATGCCAAGCGAGACTGTGAGCTGAAAGGTGGCAAACTCGCGAGTCTTGTGTCTCCAGGTGAAAAAGCAAAAATTGACAAAGAGTTCTTGTTTCTTGGAGTTGTTGCCCCGAGTGACGTCTTTCTTGGCTACAATTTGA…	GTGTTCTCTTGGTTCACAGTGG	TTATTCGGGACGATAACTTTGG	7947	-2.57215	9.00542e-15	2689	5268	2681	930	482	388	0	hypothetical protein Smed-fibrillin-like protein [Schmidtea mediterranea]	30x EGF; 3x c-Lect; vWD,TIL	other
		Mii59171_c1_g1_i1	TGGGTTCAATCAATGAGAGGACATTCAGACGAATGCATTTGTCACAATGGATTACAAGTAGTAGAACCTTATGATAACTAACAATTTTTACATGCACTATTCCGTAGTATACTTTTGTTGTTTATCTTTATATGTATGCTTGTTGAAATATAATCATTTTGGATAATATTTTTGTTATTTTATCATTAATTCCCAATGTGACAGGGACTTATTGAACCTGTAGTGGTATAGTTATCTTAAATCTCTATGATGTAAAGACAACTTTTCAACTTTTCTTAAGACAATTTAAATTCATAAAAGTAAAACACGTTCTGTTATTATTGCAGCAATCTATATACTAATATGTATATGATAAGCTATATTATCCGATGTACATAGGTAAATAAATTACATAATTTT…	CATTAATTCCCAATGTGACAGG	ATATCAGTTTGCGACACAATGC	781	4.48691	5.20579e-54	1	11	6	279	258	268		none	none	none/ no PCR	Yes
		Mii52153_c0_g1_i1	CAAATCACAAGAAAACATTTTTGTTATTTTTCATTTTTAAAATTTCTTGTCTCTCAAACTCTCTGAATGATGAAATTGACTCGCCACTTTATTGCTGTTCACATATTATTATTGTTAATTCTGAATCAATATGGATTCAGATTAATTGAATGCAATCTTTCAGAAGTCTCTAATTCAAGTCGTTCTTCACAACTAAATAATCCCACACAATTGTTTAGACAAGTCGAAATTGAAAAATTTAAAAGAAAATTTTTGAACCTTATGGGAATGACTGAAATTCCGAATGTTGGCAATGAGAGTTTTGGATTTGATTCGCTGCCAGCTTATGTAAGAAATAAAGTGGACGAAGCCAATCAACCATCATTTGCGAGAAAGAATATCGAATATAGTGAATTATTA…	GAGTTGGAACTGTCTGCTTTGC	AGTTTGGGAATTGCAATAATCG	1313	5.16023	5.92289e-54	0	3	4	257	261	307	1.74144e-21	inhibin beta B chain [Clonorchis sinensis]	TGF-beta (5.55e-16)	none/ no PCR	Yes
		Mii87058_c0_g1_i1	AACATTATGAATAAACTCGTTCTTGTGGTCGTGTCGTTCTTCCTCTTGTTTGAAAGTTTCACTGTTGACTCAATTCCCCATAAAAGAGGAGACAATGGTAATGAGGATTGTATTAGAAAAAATGATTTCTGTAGCCCTTCTGGTCCTCGTTGCTGTAGTGGAGTCTGCGACCGGAAATATGGTCAATGCAAAGATAAACAACATCTGCAATAATTATTCGTTCGTGGACCATTTTTACAATTATGTGATAGATCTAATAATATTTAATCAAACTGAACATTGTATTCATAAATGTCTTACTATAATGTGTATGTTATCTATGAATATTGTTTCTTAAATAATAATCCAAATCCAAT	CTTGTGGTCGTGTCGTTCTTCC	GGTCCACGAACGAATAATTATTGC	356	4.7469	5.10519e-32	0	0	0	117	95	144			Toxin 7 (spider tox 1.13e-3 RF+1), Signal peptidase II (2.49e-3 RF+2)	none/ no PCR	Yes

## Sheet: Fig2b adj. p-value < 0,01
#Feature	length	baseMean	log2FoldChange	lfcSE	stat	pvalue	padj	MiA1	MiA2	MiA3	Mii1	Mii2	Mii3
Mii78361_c3_g1_i1	3179	602.335	6.12579	0.225951	27.1112	7.2641e-162	1.13863e-156	11	18	6	1366	1366	1548
Mii59046_c1_g1_i2	256	923.772	8.0048	0.304434	26.2941	2.24136e-152	1.75665e-147	0	2	3	2773	1730	2213
Mii79740_c1_g1_i2	4229	473.532	6.20366	0.247326	25.0829	7.63954e-139	3.99161e-134	6	7	10	1159	1126	1087
Mii79949_c1_g1_i3	5442	463.239	4.23265	0.171689	24.653	3.4144e-134	1.338e-129	24	65	30	1006	1105	1056
Mii79253_c2_g1_i1	5341	402.86	5.90747	0.245352	24.0775	4.30279e-128	1.34891e-123	5	10	10	1110	827	944
Mii64964_c0_g1_i3	1316	418.617	4.28042	0.178787	23.9415	1.13362e-126	2.96153e-122	29	43	28	944	902	1021
Mii59046_c1_g1_i1	266	546.017	7.47466	0.322816	23.1545	1.30874e-118	2.93061e-114	0	0	3	1673	1029	1270
Mii40291_c0_g3_i1	337	418.744	7.27076	0.330727	21.9841	4.08512e-107	8.00417e-103	0	0	2	1113	892	1018
Mii40291_c0_g2_i2	292	403.189	7.28358	0.339874	21.4303	6.97933e-102	1.21555e-97	0	0	1	1193	775	962
Mii75533_c4_g4_i1	922	273.452	3.88104	0.19039	20.3847	2.28677e-92	3.58447e-88	21	39	25	615	610	621
Mii40291_c0_g1_i1	274	318.091	7.1131	0.350209	20.311	1.02772e-91	1.46448e-87	0	0	0	846	670	784
Mii59862_c0_g1_i1	821	276.629	6.31621	0.313328	20.1585	2.26772e-90	2.96217e-86	0	3	4	619	686	667
Mii40291_c0_g2_i1	274	294.94	6.91558	0.345581	20.0114	4.37767e-89	5.2784e-85	0	1	0	820	592	725
Mii72927_c0_g1_i2	1964	236.696	5.8392	0.297791	19.6084	1.31166e-85	1.46857e-81	3	3	5	536	578	566
Mii38105_c0_g2_i1	229	278.511	6.93344	0.354021	19.5848	2.08428e-85	2.17805e-81	0	0	0	783	547	690
Mii69030_c2_g1_i1	2149	214.043	5.73561	0.299029	19.1808	5.35967e-82	5.25074e-78	1	6	4	619	459	461
Mii66821_c0_g1_i1	890	767.713	-2.40318	0.12781	-18.8028	7.16565e-79	6.60707e-75	990	1967	704	386	266	212
Mii74868_c2_g1_i2	2620	223.531	6.33719	0.340204	18.6276	1.91945e-77	1.6715e-73	1	0	2	483	520	592
Mii66821_c0_g1_i3	956	690.438	-2.38285	0.130644	-18.2393	2.51744e-74	2.07686e-70	876	1773	638	363	209	215
Mii53816_c0_g1_i1	630	177.059	5.40838	0.298266	18.1327	1.75748e-73	1.37741e-69	2	5	5	429	423	404
Mii38105_c0_g3_i1	265	189.292	6.36709	0.355217	17.9245	7.58896e-72	5.66454e-68	0	1	0	503	394	471
Mii39740_c0_g1_i1	1086	186.822	6.14355	0.342943	17.9142	9.13903e-72	6.51147e-68	2	1	0	464	389	490
Mii68239_c0_g1_i3	2586	175.997	4.15825	0.233255	17.827	4.35909e-71	2.97078e-67	9	20	13	487	353	378
Mii48141_c2_g1_i2	308	186.106	6.11702	0.34411	17.7763	1.07804e-70	7.04087e-67	0	1	2	516	346	482
Mii69177_c2_g2_i1	283	1260.2	-2.26398	0.12794	-17.6957	4.52467e-70	2.83693e-66	1467	3060	1263	680	402	459
Mii103283_c0_g1_i1	516	175.373	6.35025	0.365533	17.3726	1.33121e-67	8.02556e-64	0	0	0	531	336	410
Mii38105_c0_g1_i1	265	165.235	6.19338	0.357902	17.3047	4.33747e-67	2.51811e-63	0	0	1	459	349	387
Mii83983_c0_g1_i1	368	160.379	6.04225	0.352077	17.1617	5.13451e-66	2.87437e-62	0	0	2	439	324	394
Mii76799_c1_g2_i1	1666	327.471	2.79211	0.163	17.1295	8.94772e-66	4.83634e-62	63	119	40	610	704	749
Mii74868_c1_g1_i1	1543	144.455	5.62806	0.33737	16.6821	1.7676e-62	9.23558e-59	1	2	2	327	340	362
Mii75533_c4_g4_i2	751	200.073	3.45345	0.208544	16.5598	1.35957e-61	6.87452e-58	27	30	22	439	476	407
Mii61416_c2_g1_i1	759	185.168	3.32358	0.202409	16.4201	1.37314e-60	6.72617e-57	15	45	24	423	365	433
Mii58307_c1_g1_i1	609	133.1	5.28381	0.327229	16.1471	1.18953e-58	5.6502e-55	0	6	2	324	260	366
Mii58307_c0_g1_i1	464	124.841	5.64409	0.353155	15.9819	1.70803e-57	7.8744e-54	0	3	0	320	259	320
Mii75058_c0_g1_i3	280	228.597	-3.08393	0.193427	-15.9437	3.15169e-57	1.41149e-53	283	568	265	79	40	40
Mii48141_c2_g1_i1	235	123.816	5.82031	0.365835	15.9097	5.43003e-57	2.36429e-53	0	0	1	343	249	303
Mii62447_c1_g1_i1	1278	136.797	4.82781	0.30366	15.8987	6.46656e-57	2.73952e-53	3	8	4	263	331	362
Mii40648_c0_g1_i2	834	125.336	5.68832	0.36152	15.7345	8.78008e-56	3.62174e-52	2	0	0	297	244	358
Mii71509_c0_g1_i5	542	129.84	5.68757	0.36273	15.6799	2.07557e-55	8.3421e-52	0	0	2	244	341	335
Mii75058_c1_g1_i1	224	274.51	-2.81941	0.180001	-15.6633	2.69511e-55	1.05613e-51	326	754	287	114	69	48
Mii59171_c1_g1_i1	781	115.048	4.48691	0.289966	15.4739	5.20579e-54	1.99024e-50	1	11	6	279	258	268
Mii52153_c0_g1_i1	1313	116.637	5.16023	0.333659	15.4656	5.92289e-54	2.21048e-50	0	3	4	257	261	307
Mii75533_c2_g1_i1	396	130.009	3.56838	0.234312	15.2292	2.26344e-52	8.25092e-49	12	26	10	289	290	294
Mii71407_c3_g1_i1	919	193.223	3.23352	0.212672	15.2042	3.31536e-52	1.18108e-48	34	31	22	391	437	430
Mii70634_c0_g1_i3	3911	190.491	-3.27651	0.217067	-15.0945	1.76053e-51	6.13243e-48	254	418	235	49	41	22
Mii67006_c0_g1_i1	1985	280.666	2.09704	0.139861	14.9938	8.06601e-51	2.74855e-47	83	164	50	587	520	547
Mii65894_c0_g1_i2	613	102.335	5.68042	0.379687	14.9608	1.32406e-50	4.41581e-47	0	0	0	235	224	276
Mii69809_c1_g1_i2	787	100.775	5.15261	0.345344	14.9202	2.43531e-50	7.95272e-47	1	1	3	242	230	244
Mii68315_c0_g1_i1	1156	133.547	3.31528	0.225379	14.7098	5.57841e-49	1.7845e-45	17	26	15	292	302	285
Mii67781_c1_g1_i1	876	102.702	4.34004	0.296456	14.6398	1.56628e-48	4.91023e-45	3	7	7	241	221	251
Mii67526_c1_g1_i1	1637	257.123	-2.43049	0.166452	-14.6017	2.73946e-48	8.41969e-45	313	635	261	125	87	65
Mii64964_c0_g1_i2	339	105.15	4.25907	0.292883	14.5419	6.57562e-48	1.98215e-44	2	9	8	230	237	259
Mii76799_c0_g1_i1	914	165.641	2.93511	0.202032	14.528	8.05754e-48	2.38303e-44	31	47	19	328	344	388
Mii70702_c0_g3_i4	428	91.5189	5.43189	0.374415	14.5077	1.08364e-47	3.14552e-44	0	0	1	213	223	219
Mii76814_c1_g1_i2	2192	193.662	-2.94844	0.203939	-14.4574	2.25087e-47	6.41489e-44	226	469	233	69	41	35
Mii65211_c0_g1_i1	2019	96.1265	4.44784	0.309862	14.3543	1.00147e-46	2.8032e-43	0	9	5	219	226	227
Mii40648_c0_g1_i1	687	86.8241	5.49016	0.383551	14.3141	1.78788e-46	4.9166e-43	0	0	0	217	183	226
Mii61416_c1_g1_i1	526	134.438	3.38292	0.23656	14.3005	2.17286e-46	5.87228e-43	13	27	15	264	289	334
Mii26999_c0_g1_i1	756	92.5607	4.95004	0.346197	14.2983	2.24121e-46	5.95432e-43	0	4	2	197	221	237
Mii52575_c0_g1_i2	454	94.9804	4.58413	0.32306	14.1897	1.06091e-45	2.7716e-42	2	5	4	212	194	260
Mii73373_c0_g1_i1	3961	138.551	-3.61185	0.255362	-14.144	2.0333e-45	5.22484e-42	144	337	196	26	17	17
Mii49965_c0_g1_i1	634	118.718	3.68921	0.261705	14.0968	3.97127e-45	1.00401e-41	6	22	10	340	193	282
Mii79211_c2_g1_i3	3013	88.6717	4.42157	0.316869	13.9539	2.9779e-44	7.4092e-41	1	10	2	201	204	218
Mii71136_c0_g1_i1	710	94.528	4.48874	0.323494	13.8758	8.8787e-44	2.17456e-40	2	6	4	183	215	260
Mii79949_c1_g1_i1	1092	94.0691	3.78831	0.274395	13.806	2.34335e-43	5.65101e-40	10	14	3	225	202	218
Mii24953_c0_g1_i1	521	557.37	1.53481	0.111344	13.7844	3.16367e-43	7.51362e-40	245	404	144	1120	910	974
Mii71509_c0_g1_i1	353	79.4561	5.14588	0.373542	13.7759	3.55943e-43	8.32736e-40	0	2	0	181	175	213
Mii65395_c0_g1_i1	1135	83.3629	4.86131	0.353344	13.758	4.55807e-43	1.05069e-39	0	1	4	184	184	220
Mii69030_c0_g1_i1	690	77.9241	4.8287	0.35279	13.6872	1.21135e-42	2.75183e-39	1	2	2	209	175	172
Mii61800_c1_g2_i1	325	137.81	-3.06321	0.223865	-13.6832	1.27854e-42	2.86298e-39	172	336	162	45	30	18
Mii67746_c0_g1_i1	957	113.794	3.49595	0.255611	13.6769	1.39596e-42	3.08189e-39	11	15	14	247	227	283
Mii76937_c0_g1_i1	322	492.752	-2.1224	0.155375	-13.6599	1.76261e-42	3.83731e-39	581	1082	509	296	184	165
Mii25047_c0_g1_i1	429	75.581	5.3016	0.388572	13.6438	2.19808e-42	4.71978e-39	0	0	0	210	141	197
Mii42194_c0_g1_i1	232	98.5145	-3.40424	0.249811	-13.6272	2.75832e-42	5.84271e-39	168	248	90	15	23	12
Mii63697_c0_g1_i1	1879	97.069	-3.43799	0.252548	-13.6132	3.34196e-42	6.9846e-39	130	251	111	24	15	9
Mii78361_c0_g1_i1	605	75.7849	4.98067	0.367492	13.5532	7.5899e-42	1.5654e-38	0	2	1	184	159	199
Mii71136_c1_g2_i1	464	84.2624	4.27426	0.315537	13.546	8.36842e-42	1.70355e-38	5	3	5	198	179	208
Mii78389_c0_g1_i1	5208	167.254	-2.69706	0.199613	-13.5115	1.33826e-41	2.68935e-38	210	382	189	49	59	38
Mii76738_c4_g2_i2	644	84.287	4.12024	0.305209	13.4997	1.5697e-41	3.11451e-38	0	13	4	204	192	192
Mii54332_c0_g1_i1	383	106.238	3.32446	0.246923	13.4635	2.56304e-41	5.0219e-38	6	25	14	248	218	239
Mii80177_c0_g1_i4	3548	151.409	-2.86303	0.212871	-13.4496	3.0966e-41	5.99242e-38	187	349	179	53	38	27
Mii52805_c1_g1_i2	262	124.976	-3.2622	0.243478	-13.3984	6.18123e-41	1.18158e-37	232	287	108	36	24	12
Mii71509_c0_g1_i4	260	78.2145	4.63017	0.346854	13.349	1.20015e-40	2.26653e-37	1	4	2	162	201	187
Mii65058_c5_g1_i2	2073	145.003	2.55216	0.191997	13.2928	2.55026e-40	4.75891e-37	29	64	20	323	269	314
Mii71136_c1_g1_i4	710	70.1118	4.97213	0.374946	13.2609	3.9016e-40	7.19492e-37	0	0	2	169	158	173
Mii65562_c0_g1_i1	525	1427.93	1.3381	0.101067	13.2398	5.17018e-40	9.42344e-37	665	1080	452	2826	2212	2379
Mii36610_c0_g1_i1	248	121.9	-3.18097	0.240863	-13.2066	8.03849e-40	1.44829e-36	149	297	149	36	12	26
Mii66890_c0_g1_i1	3586	178.112	-2.84574	0.216557	-13.1408	1.92077e-39	3.42132e-36	241	375	208	72	38	31
Mii46889_c0_g2_i1	309	146.883	-2.9528	0.224965	-13.1256	2.3499e-39	4.13867e-36	165	363	180	54	27	26
Mii63871_c0_g1_i1	584	67.7953	5.03236	0.384884	13.075	4.575e-39	7.96802e-36	1	0	0	152	147	186
Mii75836_c9_g4_i6	1086	186.805	-2.62617	0.20088	-13.0734	4.67577e-39	8.05405e-36	287	447	167	92	48	35
Mii70634_c0_g1_i5	2552	118.033	-3.03322	0.232203	-13.0628	5.37222e-39	9.15309e-36	151	273	141	38	22	20
Mii109492_c0_g1_i1	480	71.8293	4.9267	0.379208	12.9921	1.35708e-38	2.2873e-35	0	0	2	139	160	209
Mii74845_c3_g2_i1	1425	77.9983	4.08687	0.3159	12.9372	2.77556e-38	4.62833e-35	3	4	7	192	155	192
Mii67076_c1_g1_i1	870	68.2861	4.62376	0.358877	12.884	5.54011e-38	9.14106e-35	0	2	3	176	133	176
Mii51007_c0_g1_i1	383	84.3658	3.66894	0.28517	12.8658	7.01005e-38	1.1446e-34	3	17	6	185	203	186
Mii59958_c5_g3_i1	607	1353.26	1.32592	0.103177	12.8509	8.50061e-38	1.37366e-34	629	1025	436	2686	2076	2252
Mii61635_c0_g1_i1	777	82.8624	3.93916	0.306657	12.8455	9.11731e-38	1.45827e-34	5	7	6	179	161	228
Mii75836_c9_g4_i5	1208	164.566	-2.42549	0.188832	-12.8447	9.21026e-38	1.45827e-34	224	390	158	82	54	39
Mii54332_c0_g1_i2	371	78.8623	3.83545	0.298664	12.8421	9.53149e-38	1.49404e-34	6	6	7	208	162	171
Mii50407_c0_g2_i1	428	144.896	-2.82687	0.220405	-12.8258	1.17552e-37	1.82436e-34	193	314	168	56	34	25
Mii52575_c0_g1_i1	442	76.4395	4.07809	0.318123	12.8192	1.27958e-37	1.96638e-34	2	6	6	173	156	199
Mii79909_c0_g2_i5	14660	1910.4	-1.56155	0.121827	-12.8178	1.30316e-37	1.98319e-34	2003	3974	1798	1386	1121	944
Mii70634_c0_g1_i4	2342	107.549	-2.90221	0.226656	-12.8044	1.54824e-37	2.33349e-34	147	252	118	34	26	20
Mii66552_c1_g2_i2	421	65.0887	4.59438	0.359196	12.7907	1.84743e-37	2.75791e-34	0	3	2	167	144	152
Mii69809_c1_g2_i1	770	222.387	4.68892	0.366723	12.786	1.96293e-37	2.90269e-34	2	6	8	470	519	577
Mii65211_c0_g1_i2	2038	64.9837	4.52104	0.354828	12.7415	3.47687e-37	5.09338e-34	0	5	1	167	147	149
Mii70125_c0_g2_i1	5019	178.456	-2.71181	0.213424	-12.7062	5.4596e-37	7.87257e-34	204	392	222	72	43	39
Mii25047_c0_g2_i1	429	62.305	5.03235	0.39606	12.706	5.47446e-37	7.87257e-34	0	0	0	189	105	160
Mii64367_c0_g1_i1	1652	141.788	-2.9172	0.229862	-12.6911	6.62535e-37	9.441e-34	172	322	174	54	28	23
Mii66613_c0_g1_i1	251	414.088	1.61343	0.127243	12.6799	7.6456e-37	1.07967e-33	188	286	92	857	692	721
Mii48141_c1_g1_i1	430	65.3292	4.82364	0.380949	12.6622	9.58038e-37	1.34081e-33	0	0	2	186	108	176
Mii69814_c0_g1_i1	794	83.7499	3.74026	0.295873	12.6414	1.24793e-36	1.7257e-33	3	13	7	170	176	223
Mii72319_c4_g2_i8	326	178.831	-2.32192	0.183683	-12.641	1.25507e-36	1.7257e-33	196	433	194	73	72	56
Mii59444_c0_g2_i2	1311	79.0293	-3.2785	0.259859	-12.6165	1.71327e-36	2.33523e-33	112	203	85	19	12	12
Mii8045_c0_g1_i1	395	109.907	3.10108	0.245901	12.6111	1.83378e-36	2.47794e-33	11	22	19	284	196	239
Mii71509_c0_g1_i2	280	65.2178	4.38795	0.349142	12.5678	3.17364e-36	4.25181e-33	0	3	4	158	156	144
Mii80222_c1_g1_i1	18447	2535.02	-1.28094	0.101971	-12.5617	3.4268e-36	4.55207e-33	2665	5354	2043	2201	1653	1472
Mii79909_c0_g2_i3	14690	1897.64	-1.53369	0.122111	-12.5598	3.51236e-36	4.62652e-33	2013	3884	1770	1416	1117	948
Mii70702_c0_g5_i1	229	67.3557	4.48773	0.357472	12.554	3.77697e-36	4.93361e-33	0	3	3	138	182	152
Mii76896_c2_g6_i1	1006	141.914	-2.40549	0.191715	-12.5472	4.11843e-36	5.33517e-33	200	321	136	59	53	39
Mii65894_c0_g1_i1	521	61.2347	4.76977	0.380841	12.5243	5.49616e-36	7.06157e-33	0	0	2	132	144	158
Mii67746_c0_g1_i2	801	72.1367	3.82694	0.305936	12.509	6.66846e-36	8.49811e-33	3	11	4	171	171	155
Mii36238_c0_g1_i1	284	95.5591	3.22147	0.257838	12.4942	8.03251e-36	1.01539e-32	16	15	10	202	200	225
Mii37648_c1_g1_i1	624	136.86	-2.79451	0.223813	-12.4859	8.90809e-36	1.11706e-32	162	328	161	57	25	29
Mii75836_c9_g4_i1	948	156.574	-2.4505	0.196709	-12.4575	1.27237e-35	1.58287e-32	245	379	128	79	48	37
Mii60536_c0_g1_i1	626	71.222	3.9122	0.314254	12.4492	1.41309e-35	1.74409e-32	3	5	7	174	155	160
Mii61800_c0_g1_i1	398	101.605	-2.98389	0.239898	-12.4382	1.62171e-35	1.98593e-32	129	233	122	30	21	19
Mii76738_c4_g3_i1	1002	61.5281	4.49159	0.361416	12.4277	1.84766e-35	2.2451e-32	0	2	3	145	143	146
Mii79740_c1_g1_i3	806	58.3291	4.56911	0.369881	12.3529	4.69634e-35	5.66263e-32	0	4	0	150	131	137
Mii49419_c0_g1_i1	791	59.5754	4.5541	0.368856	12.3466	5.0837e-35	6.0829e-32	0	2	2	176	128	123
Mii66552_c1_g2_i1	420	57.5584	4.71769	0.382839	12.3229	6.8196e-35	8.09818e-32	0	1	1	136	121	154
Mii74327_c2_g1_i1	2338	98.4889	-3.12084	0.253817	-12.2957	9.55645e-35	1.12628e-31	140	225	112	33	18	10
Mii58393_c0_g1_i1	717	90.7241	3.31212	0.269407	12.2941	9.73956e-35	1.1393e-31	14	11	10	193	213	192
Mii60745_c0_g2_i1	1084	121.812	-2.70471	0.220176	-12.2843	1.10034e-34	1.27761e-31	162	261	139	45	29	30
Mii48141_c1_g2_i1	430	54.6686	4.88585	0.399192	12.2393	1.9159e-34	2.20819e-31	0	0	0	172	100	127
Mii58025_c0_g1_i2	524	59.1161	4.37583	0.357689	12.2336	2.05603e-34	2.3524e-31	0	4	2	150	128	141
Mii74274_c4_g6_i1	820	58.1547	4.50788	0.368538	12.2318	2.1028e-34	2.38563e-31	0	1	3	141	135	135
Mii66821_c0_g1_i2	236	139.161	-2.46181	0.201272	-12.2313	2.11551e-34	2.38563e-31	151	372	147	64	43	36
Mii79499_c0_g1_i3	4459	224.155	-2.1613	0.177038	-12.2081	2.81359e-34	3.15018e-31	261	491	239	124	84	73
Mii60536_c1_g1_i2	533	67.5847	3.97646	0.326971	12.1615	4.98205e-34	5.53848e-31	3	6	4	163	124	182
Mii66070_c0_g1_i1	1533	100.367	-3.14236	0.258924	-12.1363	6.78556e-34	7.4903e-31	130	239	120	36	11	14
Mii91763_c0_g1_i1	423	53.3588	4.739	0.391129	12.1162	8.66991e-34	9.50343e-31	0	0	1	124	126	131
Mii51535_c0_g1_i1	833	82.1654	3.31412	0.273599	12.1131	9.00546e-34	9.80269e-31	9	13	10	175	177	191
Mii67063_c2_g1_i1	2161	164.671	2.11042	0.1743	12.108	9.58353e-34	1.036e-30	38	98	34	342	312	320
Mii68004_c1_g1_i1	228	60.2631	4.28389	0.353832	12.1071	9.68292e-34	1.03957e-30	0	4	3	137	129	157
Mii74523_c2_g1_i2	1914	281.254	-1.97003	0.16273	-12.1061	9.80109e-34	1.0451e-30	300	624	296	164	120	113
Mii66821_c0_g1_i4	488	183.576	-2.00934	0.166347	-12.0792	1.36021e-33	1.44061e-30	255	439	146	110	77	68
Mii52144_c0_g1_i1	540	145.617	2.44034	0.202123	12.0735	1.45771e-33	1.53351e-30	43	55	19	283	282	328
Mii70107_c3_g1_i3	1619	160.158	-2.32977	0.193131	-12.0632	1.65286e-33	1.72721e-30	182	375	175	79	52	48
Mii60264_c0_g1_i1	2682	67.8641	-3.42923	0.285229	-12.0227	2.70007e-33	2.78696e-30	99	167	76	13	6	12
Mii75836_c9_g4_i4	758	131.242	-2.40527	0.200062	-12.0226	2.70254e-33	2.78696e-30	182	334	116	70	35	36
Mii69177_c2_g1_i1	283	336.266	-1.99585	0.166488	-11.9879	4.1098e-33	4.21047e-30	335	781	361	203	137	129
Mii60536_c1_g1_i1	533	59.4422	4.19511	0.350019	11.9854	4.239e-33	4.31464e-30	1	5	2	129	146	141
Mii49727_c0_g1_i1	873	62.5496	4.14628	0.346207	11.9763	4.72828e-33	4.7816e-30	0	5	4	126	152	156
Mii67076_c1_g1_i3	565	58.2417	4.31754	0.360598	11.9733	4.90573e-33	4.92925e-30	1	3	2	152	152	108
Mii80322_c1_g1_i2	5289	156.036	-2.4487	0.204918	-11.9496	6.51993e-33	6.50947e-30	226	321	159	77	43	41
Mii62479_c0_g1_i1	815	54.8878	4.70918	0.394211	11.9458	6.8252e-33	6.77111e-30	0	0	1	104	127	158
Mii78659_c0_g1_i2	1818	103.812	-2.91381	0.243943	-11.9446	6.92424e-33	6.82617e-30	136	228	124	37	21	17
Mii72319_c4_g2_i15	320	145.578	-2.55948	0.214365	-11.9398	7.33682e-33	7.1877e-30	150	345	178	50	48	39
Mii73188_c0_g1_i3	1796	132.796	-2.40395	0.201516	-11.9293	8.32457e-33	8.10471e-30	153	329	141	62	34	45
Mii72319_c4_g2_i1	294	142.299	-2.30051	0.193387	-11.8959	1.2433e-32	1.20299e-29	158	341	154	62	50	49
Mii80322_c1_g1_i8	5289	152.333	-2.50477	0.210613	-11.8928	1.29039e-32	1.24089e-29	195	379	153	77	49	26
Mii80322_c1_g1_i6	5118	145.722	-2.58759	0.217656	-11.8885	1.35889e-32	1.2988e-29	196	332	154	74	30	33
Mii79893_c3_g1_i4	5588	340.639	-1.71037	0.14411	-11.8686	1.72395e-32	1.63773e-29	370	784	310	225	195	142
Mii74523_c2_g1_i3	1306	84.7085	-3.41479	0.288179	-11.8496	2.16286e-32	2.04231e-29	82	218	119	18	9	12
Mii58412_c1_g1_i1	860	50.331	4.57131	0.387371	11.8008	3.8644e-32	3.62717e-29	0	2	0	123	109	129
Mii87058_c0_g1_i1	356	49.4702	4.7469	0.403052	11.7774	5.10519e-32	4.76327e-29	0	0	0	117	95	144
Mii73188_c0_g1_i2	1791	155.708	-2.28718	0.194551	-11.7562	6.56378e-32	6.08792e-29	181	357	168	75	60	43
Mii53135_c0_g1_i1	819	60.6919	3.99496	0.340726	11.7248	9.51018e-32	8.76883e-29	1	3	6	134	133	151
Mii64745_c0_g1_i1	586	1429.47	1.3172	0.11246	11.7126	1.09904e-31	1.00744e-28	627	1116	476	2443	2211	2700
Mii75404_c1_g3_i12	3827	82.2213	-3.19251	0.272613	-11.7108	1.12202e-31	1.02253e-28	105	179	106	21	14	11
Mii71509_c0_g1_i6	289	50.6935	4.45191	0.380808	11.6907	1.42225e-31	1.28864e-28	0	2	1	115	121	124
Mii51329_c1_g1_i1	609	46.8563	4.70946	0.403102	11.6831	1.55586e-31	1.4016e-28	0	0	0	118	96	124
Mii78140_c8_g2_i1	2631	216.805	-2.31418	0.198443	-11.6617	1.99972e-31	1.79115e-28	257	432	254	110	72	62
Mii61800_c0_g1_i3	290	83.5271	-3.12538	0.268299	-11.6489	2.32572e-31	2.07131e-28	94	212	105	26	12	12
Mii60536_c0_g1_i2	628	62.9933	4.05232	0.348216	11.6374	2.66029e-31	2.35591e-28	1	6	3	115	136	185
Mii65395_c0_g1_i2	1135	47.1059	4.69326	0.404154	11.6126	3.55814e-31	3.13332e-28	0	0	0	99	111	127
Mii79200_c0_g1_i1	762	139.733	-2.42953	0.209276	-11.6092	3.70173e-31	3.24155e-28	195	320	136	73	44	29
Mii74274_c1_g1_i1	624	48.3777	4.59965	0.397237	11.5791	5.26032e-31	4.58081e-28	0	1	0	99	115	131
Mii76799_c1_g2_i3	1465	377.273	1.68169	0.145393	11.5665	6.09485e-31	5.27821e-28	143	229	105	650	667	751
Mii78361_c2_g4_i1	246	51.6864	4.41762	0.382526	11.5485	7.50864e-31	6.46684e-28	0	1	2	110	106	149
Mii70702_c0_g3_i3	348	52.6405	4.33134	0.375256	11.5423	8.07011e-31	6.91242e-28	0	1	3	109	118	142
Mii76799_c0_g1_i2	848	154.116	2.16816	0.188295	11.5147	1.11292e-30	9.48087e-28	46	80	25	294	279	344
Mii51960_c0_g1_i2	1218	100.826	2.70048	0.234545	11.5137	1.12593e-30	9.53989e-28	18	38	12	194	204	240
Mii78906_c0_g1_i2	10518	943.42	-1.58486	0.137739	-11.5063	1.2266e-30	1.03369e-27	983	1917	920	674	558	441
Mii47850_c0_g1_i1	742	49.128	4.47511	0.390726	11.4533	2.26302e-30	1.89692e-27	0	1	1	105	100	144
Mii80327_c0_g2_i1	3038	108.248	-2.54639	0.222627	-11.4379	2.70306e-30	2.25372e-27	135	239	123	43	29	30
Mii66965_c1_g3_i2	359	73.9029	3.25738	0.285557	11.4071	3.85425e-30	3.19654e-27	10	11	8	150	179	158
Mii66576_c0_g1_i4	1242	47.597	4.35507	0.381878	11.4044	3.97677e-30	3.28079e-27	0	1	2	129	112	98
Mii67781_c1_g1_i3	876	75.5786	3.02362	0.265309	11.3966	4.34782e-30	3.56813e-27	10	19	9	173	149	172
Mii75555_c2_g1_i1	4081	92.2861	-2.88591	0.253343	-11.3913	4.6204e-30	3.77208e-27	119	204	111	34	15	18
Mii51960_c0_g1_i1	1173	80.3151	3.04779	0.268413	11.3548	7.01618e-30	5.6983e-27	12	27	3	164	167	199
Mii68974_c2_g1_i1	1145	52.8954	4.20664	0.370977	11.3394	8.37491e-30	6.76676e-27	0	1	4	109	145	114
Mii36610_c0_g2_i1	244	121.935	-2.76085	0.243623	-11.3325	9.06131e-30	7.2838e-27	132	270	159	48	26	24
Mii67526_c1_g1_i2	653	97.2122	-2.45985	0.217102	-11.3304	9.27867e-30	7.42048e-27	123	241	98	41	26	31
Mii42458_c0_g2_i1	426	47.3822	4.43163	0.391649	11.3153	1.10233e-29	8.77097e-27	0	1	1	93	119	123
Mii53444_c0_g1_i1	259	163.494	-2.49725	0.220716	-11.3143	1.11457e-29	8.82357e-27	148	394	209	64	46	50
Mii54332_c0_g1_i3	419	66.6523	3.30153	0.292499	11.2873	1.51593e-29	1.19406e-26	4	15	7	145	143	157
Mii77722_c0_g1_i2	826	148.027	-2.46356	0.218647	-11.2673	1.90297e-29	1.49143e-26	170	300	183	63	40	45
Mii24870_c0_g1_i1	353	57.8846	3.60235	0.320211	11.2499	2.31769e-29	1.80743e-26	5	8	3	128	130	137
Mii65058_c5_g1_i1	2066	134.105	2.21401	0.197029	11.237	2.68381e-29	2.08259e-26	32	63	29	275	233	293
Mii78252_c2_g2_i3	4705	2058.43	-0.952661	0.084806	-11.2334	2.79488e-29	2.15809e-26	2056	4124	1486	1971	1573	1514
Mii71407_c3_g2_i4	904	67.3774	3.41788	0.304474	11.2255	3.05529e-29	2.3476e-26	7	8	7	132	146	171
Mii40914_c0_g1_i1	233	99.1277	2.51466	0.224245	11.2139	3.48472e-29	2.6645e-26	21	36	17	208	193	213
Mii44734_c0_g1_i1	556	66.4194	3.29193	0.293936	11.1995	4.10102e-29	3.12052e-26	4	15	7	148	131	165
Mii78937_c0_g1_i2	525	59.2767	3.55722	0.317826	11.1924	4.44413e-29	3.36526e-26	5	12	1	129	148	129
Mii79893_c3_g1_i1	6064	426.5	-1.72609	0.154274	-11.1885	4.64422e-29	3.49987e-26	443	993	401	281	254	161
Mii80327_c0_g2_i6	4036	138.956	-2.44187	0.21839	-11.1812	5.04051e-29	3.78034e-26	164	285	167	62	41	38
Mii80186_c0_g1_i3	16068	1187.34	-1.21651	0.108988	-11.1619	6.26264e-29	4.67455e-26	1158	2458	1001	1003	806	752
Mii44958_c0_g2_i1	1455	123.432	2.22353	0.199446	11.1485	7.28197e-29	5.40964e-26	33	60	22	241	243	255
Mii80086_c1_g2_i1	1071	90.7982	-2.69356	0.24165	-11.1465	7.44492e-29	5.50461e-26	117	203	104	34	24	18
Mii71549_c0_g1_i1	2049	54.149	-3.92891	0.352718	-11.139	8.10633e-29	5.9655e-26	66	117	80	8	3	1
Mii62612_c0_g1_i1	1541	46.5048	4.21479	0.37878	11.1273	9.2415e-29	6.7691e-26	1	2	1	101	105	122
Mii69837_c0_g1_i4	800	66.6933	3.55255	0.319521	11.1184	1.02133e-28	7.44611e-26	3	6	9	130	140	177
Mii70702_c0_g1_i1	224	49.4355	4.16413	0.374559	11.1174	1.03203e-28	7.48928e-26	0	3	2	96	113	137
Mii69809_c0_g2_i1	452	48.8829	4.07255	0.366432	11.1141	1.07163e-28	7.74084e-26	0	3	3	105	117	119
Mii74745_c0_g4_i1	522	158.927	-1.97178	0.17792	-11.0824	1.52782e-28	1.09855e-25	183	363	156	92	69	61
Mii37165_c0_g1_i1	1747	67.5937	-3.41202	0.308047	-11.0763	1.63543e-28	1.17055e-25	84	136	96	13	8	8
Mii69473_c0_g1_i1	2298	76.3131	-2.91165	0.263108	-11.0664	1.82664e-28	1.30146e-25	104	168	89	22	19	12
Mii76814_c0_g2_i2	356	197.176	-1.89585	0.171642	-11.0454	2.3069e-28	1.63621e-25	230	450	186	133	73	85
Mii62146_c0_g1_i2	442	50.2971	3.9881	0.361369	11.0361	2.55884e-28	1.80673e-25	2	2	3	101	120	127
Mii70702_c0_g2_i1	229	47.8088	4.37285	0.39635	11.0328	2.65429e-28	1.86572e-25	0	1	1	103	79	158
Mii80266_c2_g2_i3	3398	117.101	-2.78448	0.252655	-11.0209	3.03164e-28	2.11894e-25	120	253	160	30	37	23
Mii6724_c0_g1_i1	555	83.6427	-3.21524	0.29175	-11.0206	3.04158e-28	2.11894e-25	91	171	123	20	14	10
Mii79581_c9_g3_i1	536	189.939	-1.8673	0.169804	-10.9968	3.95803e-28	2.74519e-25	217	413	187	118	80	85
Mii79953_c0_g1_i1	8646	1222.81	-2.92952	0.26778	-10.94	7.41703e-28	5.12161e-25	1661	2939	1347	421	240	203
Mii50407_c1_g1_i2	338	97.2232	-2.80903	0.257115	-10.9252	8.73549e-28	6.00557e-25	147	185	111	36	14	24
Mii81672_c0_g1_i1	296	127.825	-2.58813	0.237653	-10.8904	1.2812e-27	8.75469e-25	131	310	157	61	29	27
Mii75058_c0_g1_i2	256	113.631	-2.42401	0.222588	-10.8901	1.2846e-27	8.75469e-25	124	263	133	49	37	30
Mii79682_c0_g1_i2	323	56.1791	3.44623	0.316958	10.8728	1.55296e-27	1.05378e-24	4	10	4	121	132	127
Mii79581_c9_g3_i4	374	129.206	-2.19766	0.202217	-10.8678	1.64025e-27	1.10821e-24	165	277	133	67	49	39
Mii79863_c5_g1_i2	855	205.763	-1.69003	0.155752	-10.8508	1.97692e-27	1.32995e-24	240	458	181	144	99	99
Mii63360_c0_g1_i1	315	45.1454	4.05123	0.374059	10.8305	2.46899e-27	1.65388e-24	0	2	3	103	95	118
Mii45821_c0_g1_i1	1118	55.7405	-3.54758	0.327601	-10.829	2.5098e-27	1.67407e-24	75	119	75	12	4	4
Mii57348_c0_g1_i1	1364	164.131	3.85672	0.356735	10.8111	3.04836e-27	2.02468e-24	5	11	12	346	376	410
Mii77982_c1_g5_i1	312	210.326	-1.86053	0.172211	-10.8038	3.30337e-27	2.1848e-24	254	420	210	131	87	96
Mii61416_c2_g2_i3	813	43.4825	4.36639	0.404376	10.7978	3.52367e-27	2.32071e-24	0	0	1	71	113	122
Mii72319_c4_g2_i14	329	125.388	-2.43933	0.226196	-10.7842	4.08943e-27	2.68205e-24	129	304	148	57	43	27
Mii66576_c0_g1_i1	984	37.848	4.42913	0.410799	10.7817	4.19844e-27	2.74207e-24	0	0	0	91	102	79
Mii68974_c2_g1_i2	649	38.1426	4.42876	0.411068	10.7738	4.57787e-27	2.97748e-24	0	0	0	81	89	103
Mii73551_c0_g2_i7	1442	49.6754	3.61989	0.336173	10.768	4.87712e-27	3.15901e-24	3	9	1	126	109	110
Mii74845_c3_g1_i2	1930	41.455	4.24719	0.394494	10.7662	4.97222e-27	3.20735e-24	0	0	2	88	107	97
Mii66735_c0_g1_i3	228	98.5764	-2.6143	0.243057	-10.7559	5.55616e-27	3.56933e-24	124	230	110	48	21	19
Mii84127_c0_g1_i1	313	138.3	-2.39145	0.222676	-10.7396	6.63282e-27	4.2436e-24	156	315	159	75	38	33
Mii70242_c0_g1_i1	322	156.454	-1.90825	0.17781	-10.732	7.20157e-27	4.58875e-24	183	352	150	96	69	62
Mii78361_c2_g2_i1	338	36.6152	4.40785	0.410814	10.7296	7.3936e-27	4.69203e-24	0	0	0	93	87	84
Mii52606_c0_g2_i1	394	49.8159	3.75922	0.351045	10.7087	9.26865e-27	5.85823e-24	3	5	2	98	112	133
Mii67617_c0_g1_i1	4261	77.3165	-2.64456	0.247064	-10.704	9.752e-27	6.13898e-24	104	191	79	33	19	15
Mii42458_c0_g1_i1	345	44.9398	3.94617	0.368753	10.7014	1.00253e-26	6.2858e-24	1	2	3	109	88	117
Mii80292_c2_g1_i2	2132	204.305	-1.9527	0.182517	-10.6987	1.03237e-26	6.44708e-24	237	443	206	128	96	65
Mii79695_c0_g1_i2	2054	112.747	-2.52369	0.23595	-10.6959	1.06416e-26	6.61925e-24	132	227	141	44	28	34
Mii80254_c0_g1_i2	732	78.3762	-2.73551	0.255891	-10.6901	1.13189e-26	7.01269e-24	91	183	95	22	18	22
Mii72319_c4_g2_i12	293	108.222	-2.49276	0.233528	-10.6743	1.34234e-26	8.28382e-24	133	231	126	51	25	29
Mii56819_c0_g1_i1	818	47.245	3.90639	0.366303	10.6644	1.49415e-26	9.18451e-24	2	3	2	89	111	127
Mii66576_c0_g1_i2	964	37.3823	4.3046	0.403899	10.6576	1.60634e-26	9.83554e-24	0	1	0	97	92	80
Mii78997_c1_g2_i1	265	88.3191	-2.81661	0.264353	-10.6547	1.65743e-26	1.01089e-23	106	188	113	34	16	16
Mii79253_c3_g1_i1	595	37.652	4.29087	0.402846	10.6514	1.71804e-26	1.0438e-23	0	0	1	100	78	92
Mii69474_c0_g1_i1	2325	113.774	-2.45057	0.230878	-10.6141	2.56168e-26	1.55034e-23	173	273	99	65	27	24
Mii97707_c0_g1_i1	365	38.6875	4.20194	0.396309	10.6027	2.89565e-26	1.74572e-23	0	1	1	90	86	99
Mii72927_c0_g1_i1	3208	396.023	4.40822	0.416094	10.5943	3.16685e-26	1.9019e-23	4	4	9	875	961	973
Mii69809_c0_g1_i1	665	223.413	4.25407	0.401968	10.5831	3.56869e-26	2.13506e-23	3	4	8	483	507	585
Mii80214_c1_g1_i1	2730	78.9546	-2.75917	0.260731	-10.5824	3.59541e-26	2.14286e-23	105	162	95	24	17	20
Mii58153_c1_g1_i1	292	80.2228	2.71066	0.256474	10.5689	4.15169e-26	2.46504e-23	17	25	9	151	179	178
Mii63360_c0_g1_i3	319	42.3826	3.98435	0.377525	10.5539	4.87466e-26	2.88337e-23	0	3	2	92	93	112
Mii79211_c2_g1_i5	2995	47.6094	3.61927	0.342969	10.5528	4.93157e-26	2.90607e-23	1	9	2	114	101	115
Mii14341_c0_g1_i1	264	45.8491	3.80411	0.360596	10.5495	5.10494e-26	2.99696e-23	1	4	3	103	91	124
Mii71136_c0_g1_i2	351	46.5621	3.68628	0.349541	10.5461	5.29748e-26	3.0984e-23	5	4	1	108	100	114
Mii61816_c0_g1_i5	342	179.903	-2.14486	0.203427	-10.5436	5.4358e-26	3.16748e-23	223	354	197	105	67	52
Mii80327_c0_g2_i4	4027	129.806	-2.35708	0.224169	-10.5147	7.38962e-26	4.29003e-23	148	307	143	62	53	24
Mii66671_c2_g1_i1	973	77.7296	-2.69325	0.256444	-10.5023	8.43039e-26	4.87619e-23	88	184	94	19	23	21
Mii75404_c1_g3_i6	3817	75.4516	-2.56877	0.244616	-10.5012	8.52457e-26	4.91254e-23	99	190	76	33	18	18
Mii80080_c2_g2_i1	12724	699.854	-1.07883	0.1028	-10.4944	9.1611e-26	5.26002e-23	702	1473	524	616	529	469
Mii79695_c0_g1_i1	2045	109.841	-2.527	0.241909	-10.4461	1.527e-25	8.73556e-23	140	219	131	49	33	21
Mii31261_c0_g1_i1	357	50.6352	-3.2312	0.310256	-10.4146	2.12638e-25	1.21202e-22	59	142	60	11	9	5
Mii74845_c3_g1_i3	1959	36.1691	4.23622	0.406791	10.4138	2.14576e-25	1.21864e-22	0	1	0	89	69	102
Mii63749_c0_g1_i1	899	77.7487	2.6845	0.257903	10.4089	2.25732e-25	1.27737e-22	18	18	12	165	156	169
Mii75716_c0_g1_i3	4721	71.1621	-3.0006	0.288298	-10.408	2.28036e-25	1.28576e-22	85	173	88	28	8	9
Mii90995_c0_g1_i1	311	67.8052	-3.03658	0.291817	-10.4058	2.33367e-25	1.31111e-22	88	149	85	22	5	14
Mii78252_c2_g1_i1	246	88.4736	-2.47807	0.238826	-10.376	3.1869e-25	1.78407e-22	123	196	91	39	30	17
Mii76814_c0_g2_i3	433	225.151	-1.83328	0.176718	-10.3741	3.25404e-25	1.81517e-22	241	491	229	130	128	82
Mii75404_c1_g3_i8	3784	74.3073	-2.7152	0.261801	-10.3712	3.35194e-25	1.86315e-22	112	162	77	31	13	16
Mii80266_c0_g1_i1	3195	83.5453	-2.83742	0.273698	-10.367	3.50423e-25	1.94092e-22	96	167	114	27	17	16
Mii73720_c2_g3_i2	2848	150.31	-2.38528	0.230201	-10.3618	3.70122e-25	2.04281e-22	159	296	195	65	53	38
Mii80266_c2_g2_i2	3386	108.195	-2.68254	0.259281	-10.3461	4.36007e-25	2.39801e-22	103	243	148	38	32	19
Mii118322_c0_g1_i1	469	224.53	-1.88554	0.182275	-10.3445	4.4329e-25	2.42954e-22	218	505	243	142	98	90
Mii80327_c0_g2_i7	3333	109.814	-2.45295	0.237511	-10.3277	5.27988e-25	2.88366e-22	130	259	122	60	28	22
Mii50536_c0_g1_i1	694	463.95	3.84655	0.372483	10.3268	5.3314e-25	2.90169e-22	19	24	27	995	1096	1124
Mii69837_c0_g1_i6	718	64.8252	3.1853	0.308799	10.3151	6.0193e-25	3.26475e-22	13	11	2	113	149	167
Mii73188_c0_g1_i1	1743	100.619	-2.41462	0.234362	-10.3029	6.83557e-25	3.6947e-22	114	219	120	45	27	30
Mii75404_c1_g3_i7	3910	68.322	-2.86686	0.278551	-10.292	7.65446e-25	4.1231e-22	99	147	77	25	15	8
Mii62034_c1_g1_i3	552	50.1366	3.38189	0.328642	10.2905	7.77892e-25	4.17579e-22	8	7	1	109	113	118
Mii50082_c0_g1_i1	2145	69.6753	-2.88291	0.28018	-10.2895	7.86011e-25	4.20497e-22	86	152	88	23	9	16
Mii72677_c2_g1_i4	1595	81.2056	-2.58136	0.251198	-10.2762	9.0199e-25	4.80902e-22	87	220	90	34	25	14
Mii69812_c0_g1_i1	13631	4412.68	-1.11409	0.10845	-10.2729	9.33705e-25	4.96123e-22	4011	9128	3699	3994	3060	2983
Mii76546_c2_g1_i2	3490	90.5177	-2.52064	0.245596	-10.2634	1.03035e-24	5.45624e-22	102	195	112	33	23	28
Mii78370_c5_g1_i2	3312	332.318	-1.62568	0.15849	-10.2573	1.09787e-24	5.79425e-22	381	712	297	253	191	130
Mii80272_c7_g1_i3	2734	383.697	-2.69299	0.262776	-10.2482	1.20533e-24	6.34006e-22	432	863	480	131	91	95
Mii80274_c4_g2_i1	3938	200.458	-1.86832	0.182707	-10.2258	1.52024e-24	7.96969e-22	210	417	217	122	89	85
Mii43608_c0_g1_i1	239	50.0839	3.36174	0.32899	10.2183	1.64122e-24	8.57528e-22	6	7	3	101	116	120
Mii68564_c0_g1_i1	1178	37.5874	3.93973	0.385817	10.2114	1.76318e-24	9.18188e-22	1	2	1	88	81	96
Mii75404_c1_g3_i1	3877	66.1917	-2.73765	0.268436	-10.1985	2.0128e-24	1.04471e-21	97	149	69	12	20	19
Mii60317_c0_g1_i1	2263	291.447	1.35017	0.132431	10.1953	2.08083e-24	1.07646e-21	136	242	81	533	468	516
Mii62034_c1_g1_i2	669	55.0298	3.16706	0.312147	10.146	3.45053e-24	1.77916e-21	4	8	9	124	112	127
Mii80327_c0_g2_i2	4057	143.291	-2.28285	0.225034	-10.1444	3.50788e-24	1.8028e-21	150	320	170	77	51	33
Mii45186_c0_g1_i1	783	159.451	-2.12906	0.209905	-10.143	3.56125e-24	1.82424e-21	196	327	171	98	59	43
Mii72319_c3_g2_i8	333	387.364	-1.69676	0.167324	-10.1406	3.65016e-24	1.8606e-21	367	814	414	254	213	170
Mii76930_c1_g1_i1	4393	164.982	-2.08264	0.20538	-10.1404	3.65596e-24	1.8606e-21	158	361	196	82	67	62
Mii62972_c1_g1_i2	3029	58.5757	-2.99121	0.295375	-10.1268	4.20076e-24	2.13094e-21	97	117	63	16	10	10
Mii63519_c0_g1_i2	1574	51.6	-3.12468	0.308577	-10.1261	4.23132e-24	2.13952e-21	72	128	58	16	3	9
Mii79586_c0_g1_i10	667	80.6892	-2.65076	0.262045	-10.1157	4.70821e-24	2.373e-21	100	178	96	36	14	18
Mii51769_c0_g1_i2	768	58.505	3.02978	0.300264	10.0904	6.09245e-24	3.06083e-21	11	9	6	120	124	138
Mii80214_c1_g1_i7	2092	54.5909	-3.00835	0.298225	-10.0875	6.27466e-24	3.1423e-21	87	119	58	16	10	7
Mii77758_c1_g1_i1	5347	556.021	-1.43649	0.142433	-10.0854	6.41003e-24	3.19987e-21	550	1147	523	417	366	279
Mii63970_c0_g2_i3	2077	57.3352	-2.97298	0.295063	-10.0757	7.07194e-24	3.51909e-21	75	135	68	20	9	7
Mii72319_c4_g2_i6	489	294.558	-1.49281	0.148248	-10.0697	7.52204e-24	3.73122e-21	305	638	266	219	183	143
Mii5005_c0_g1_i1	342	43.046	3.52652	0.350281	10.0677	7.67573e-24	3.79544e-21	2	7	2	96	104	96
Mii59958_c3_g1_i1	427	867.244	1.22913	0.122152	10.0623	8.11042e-24	3.99777e-21	384	684	320	1489	1324	1569
Mii36342_c0_g1_i1	363	265.874	-3.15059	0.313176	-10.0601	8.28966e-24	4.07332e-21	491	657	220	76	37	32
Mii18517_c0_g1_i1	408	37.9952	3.89577	0.387381	10.0567	8.58461e-24	4.20506e-21	1	1	2	78	82	105
Mii78419_c4_g1_i1	990	117.219	2.37248	0.236027	10.0517	9.02646e-24	4.40772e-21	33	50	14	180	269	264
Mii90016_c0_g1_i1	508	36.4799	3.88897	0.386909	10.0514	9.05952e-24	4.41013e-21	0	2	2	84	83	89
Mii79654_c4_g4_i4	638	157.549	-1.97332	0.196335	-10.0508	9.11423e-24	4.42303e-21	177	341	165	98	69	51
Mii65366_c0_g1_i1	476	50.4582	3.30103	0.328946	10.0352	1.06774e-23	5.16564e-21	8	7	2	107	98	135
Mii56819_c0_g1_i2	835	33.4129	4.02594	0.401393	10.0299	1.12606e-23	5.43101e-21	1	1	0	86	71	82
Mii10203_c0_g2_i1	522	329.514	-3.03571	0.30296	-10.0201	1.24324e-23	5.97775e-21	346	778	448	83	60	55
Mii69422_c2_g1_i1	1801	79.36	-2.51946	0.251499	-10.0178	1.27307e-23	6.10248e-21	107	198	78	42	18	15
Mii33835_c0_g1_i1	380	36.2956	3.95862	0.396085	9.99438	1.61293e-23	7.70805e-21	2	1	0	75	75	106
Mii78002_c0_g1_i1	8365	1553.42	-0.878036	0.0878837	-9.9909	1.67066e-23	7.95965e-21	1490	3053	1126	1465	1274	1198
Mii66735_c1_g5_i1	266	95.8499	-2.49547	0.249808	-9.98958	1.69292e-23	8.04127e-21	148	197	95	50	17	25
Mii74018_c2_g1_i2	1330	98.7507	-2.35087	0.2357	-9.97401	1.9806e-23	9.37931e-21	119	201	116	46	29	29
Mii79552_c1_g2_i1	3177	68.5733	-2.59338	0.260243	-9.96522	2.16399e-23	1.02169e-20	90	158	75	29	15	16
Mii74018_c2_g1_i1	680	177.202	-1.9942	0.200311	-9.95554	2.38534e-23	1.12282e-20	176	369	207	95	67	78
Mii43666_c0_g1_i1	355	37.0308	3.74893	0.376603	9.9546	2.4079e-23	1.13004e-20	2	4	0	92	79	90
Mii62972_c1_g1_i3	3044	57.528	-3.10028	0.311468	-9.95376	2.4283e-23	1.13621e-20	84	106	74	14	11	6
Mii77752_c1_g3_i1	2236	73.3771	-2.84943	0.286312	-9.9522	2.46676e-23	1.15077e-20	84	150	100	24	17	10
Mii69837_c1_g1_i2	887	71.8502	2.81467	0.282999	9.94587	2.62874e-23	1.2227e-20	13	16	10	134	131	194
Mii52110_c4_g1_i1	229	213.713	-1.89057	0.190307	-9.93431	2.95206e-23	1.36902e-20	262	460	203	149	103	62
Mii70426_c0_g1_i1	2834	59.8	-2.96903	0.29947	-9.91428	3.60856e-23	1.66854e-20	72	129	79	19	9	9
Mii72677_c1_g2_i1	239	116.644	-2.27962	0.230034	-9.9099	3.77015e-23	1.73813e-20	137	239	136	61	40	29
Mii79586_c0_g1_i4	2675	138.999	-1.90512	0.192796	-9.88156	5.00452e-23	2.30044e-20	155	291	146	69	65	64
Mii50047_c0_g1_i1	583	56.5217	2.87788	0.291559	9.87068	5.57873e-23	2.55689e-20	9	12	8	130	113	123
Mii80322_c1_g1_i5	2773	78.9808	-2.67081	0.27062	-9.86922	5.66022e-23	2.58667e-20	88	187	97	36	17	12
Mii70634_c0_g1_i2	1797	48.2942	-3.09924	0.31413	-9.86611	5.83856e-23	2.66041e-20	58	121	60	13	7	6
Mii38524_c0_g1_i1	466	255.74	1.45894	0.147899	9.86449	5.93352e-23	2.69585e-20	129	183	62	488	437	436
Mii51987_c0_g1_i1	368	31.7507	4.06219	0.411843	9.86344	5.99607e-23	2.71639e-20	0	1	0	70	66	91
Mii80266_c1_g1_i3	3069	138.599	-2.10698	0.21364	-9.86233	6.06283e-23	2.73872e-20	145	283	165	66	49	58
Mii61158_c2_g1_i1	510	34.1951	3.83601	0.389587	9.84635	7.10795e-23	3.2016e-20	0	3	1	93	75	75
Mii68958_c0_g1_i3	2513	56.0223	-3.16243	0.321839	-9.82612	8.69034e-23	3.90313e-20	64	115	81	15	6	7
Mii79863_c5_g1_i1	381	147.462	-1.92741	0.19616	-9.8257	8.72626e-23	3.90807e-20	180	327	140	102	61	48
Mii80188_c0_g2_i1	5017	290.109	-3.0383	0.309615	-9.81314	9.88458e-23	4.41421e-20	320	764	360	86	38	49
Mii80332_c1_g1_i1	1373	63.9227	-2.71189	0.276414	-9.81097	1.00989e-22	4.49713e-20	79	143	77	24	12	14
Mii75404_c1_g3_i5	3860	73.5723	-2.77891	0.28334	-9.80769	1.04332e-22	4.6328e-20	94	137	97	25	17	12
Mii41520_c0_g1_i1	428	34.4908	3.8977	0.397452	9.80672	1.05335e-22	4.65319e-20	2	1	0	71	74	98
Mii60548_c0_g1_i1	1146	339.533	1.27039	0.129543	9.80667	1.05385e-22	4.65319e-20	180	287	90	627	559	556
Mii79740_c1_g1_i1	4294	523.817	4.17325	0.425595	9.80568	1.06425e-22	4.68595e-20	4	8	13	1214	1228	1279
Mii68004_c1_g1_i3	267	34.5073	3.87916	0.395874	9.79898	1.13727e-22	4.9934e-20	2	0	1	74	73	95
Mii73551_c0_g2_i6	1392	50.5941	3.12897	0.319531	9.79241	1.21366e-22	5.31156e-20	8	8	4	106	128	101
Mii34314_c0_g1_i1	308	46.6612	3.27173	0.334117	9.79217	1.21651e-22	5.31156e-20	4	5	6	99	100	112
Mii44512_c0_g1_i1	380	52.4611	2.98234	0.30458	9.79166	1.22277e-22	5.32408e-20	4	14	7	135	97	115
Mii80272_c6_g1_i2	3505	581.487	-1.28815	0.131639	-9.7855	1.29946e-22	5.64232e-20	601	1097	525	404	393	396
Mii75316_c4_g2_i4	3414	86.9383	-2.6472	0.27115	-9.76286	1.62502e-22	7.03641e-20	104	165	115	36	19	17
Mii70603_c0_g1_i2	3534	81.375	-2.62885	0.269378	-9.75896	1.68871e-22	7.29207e-20	84	194	103	37	15	17
Mii80157_c0_g1_i1	5334	83.0243	-2.58145	0.264844	-9.74704	1.89926e-22	8.17871e-20	90	189	104	38	20	15
Mii61416_c2_g2_i1	1131	38.1843	3.61775	0.371556	9.73676	2.10153e-22	9.02495e-20	3	2	2	81	82	100
Mii70533_c1_g1_i3	517	59.0102	-2.9699	0.305064	-9.73536	2.13058e-22	9.12472e-20	82	115	75	19	11	6
Mii78361_c2_g1_i1	338	31.4918	3.93068	0.403979	9.72991	2.24784e-22	9.60068e-20	0	1	1	78	65	81
Mii102356_c0_g1_i1	304	60.4984	-2.82454	0.290594	-9.71988	2.48078e-22	1.05668e-19	86	137	67	25	12	6
Mii80292_c2_g1_i1	2167	199.487	-1.85908	0.191406	-9.71278	2.6598e-22	1.12986e-19	239	391	204	139	87	71
Mii75186_c1_g2_i1	863	61.3292	-2.94229	0.302976	-9.71131	2.69843e-22	1.14317e-19	89	129	72	25	8	6
Mii61378_c0_g1_i1	252	150.971	-2.08487	0.214917	-9.70079	2.99162e-22	1.26396e-19	144	326	182	81	58	53
Mii75404_c1_g3_i11	3867	65.3627	-2.72993	0.2817	-9.69092	3.29532e-22	1.38853e-19	72	155	82	23	18	9
Mii71509_c0_g1_i7	225	32.7235	3.91551	0.404087	9.68977	3.33263e-22	1.40049e-19	0	0	2	65	83	81
Mii74624_c4_g2_i1	415	33.9053	3.79199	0.391642	9.68229	3.58593e-22	1.50291e-19	2	2	0	71	85	82
Mii79559_c8_g1_i2	266	238.67	-1.75528	0.181409	-9.67581	3.8206e-22	1.59699e-19	231	504	258	156	121	100
Mii62972_c1_g1_i4	3071	63.14	-2.69233	0.278317	-9.67361	3.90361e-22	1.62735e-19	90	132	71	25	14	11
Mii79645_c0_g1_i5	12462	693.813	-1.22295	0.126677	-9.65407	4.7244e-22	1.9643e-19	679	1415	595	576	509	399
Mii78274_c2_g1_i1	1319	161.963	1.62711	0.168805	9.63898	5.47283e-22	2.26946e-19	64	105	44	313	276	297
Mii22432_c0_g1_i1	537	30.7343	3.97863	0.412788	9.63845	5.50126e-22	2.27523e-19	0	0	1	60	74	83
Mii80266_c2_g1_i3	1207	61.39	-2.76435	0.286833	-9.63747	5.55416e-22	2.29106e-19	81	124	76	19	16	10
Mii63259_c0_g2_i1	559	269.568	1.31734	0.136826	9.62783	6.10019e-22	2.50969e-19	123	212	87	510	428	453
Mii79552_c1_g2_i4	3175	69.8989	-2.5937	0.269941	-9.60841	7.36775e-22	3.02325e-19	94	141	82	29	14	17
Mii78721_c1_g1_i1	1270	76.1301	-2.5723	0.267768	-9.60645	7.50915e-22	3.07322e-19	86	155	99	27	21	18
Mii78597_c0_g1_i2	5750	2101.05	-2.83259	0.295088	-9.59913	8.06232e-22	3.29102e-19	2573	4981	2511	733	425	351
Mii80219_c0_g1_i2	1005	72.4382	-2.56364	0.267401	-9.58726	9.04554e-22	3.68278e-19	96	150	84	33	15	16
Mii62683_c0_g1_i1	733	59.6634	-2.68857	0.280962	-9.56918	1.07761e-21	4.37598e-19	73	137	71	22	15	10
Mii79654_c4_g3_i1	272	106.781	-2.14895	0.224578	-9.5688	1.08154e-21	4.3806e-19	142	213	111	62	34	34
Mii76750_c3_g2_i1	1511	35.7592	3.56133	0.372753	9.55411	1.24649e-21	5.03568e-19	2	3	2	81	79	87
Mii76063_c1_g1_i8	2516	86.2165	-2.26454	0.237119	-9.55024	1.29395e-21	5.21397e-19	100	189	97	32	37	26
Mii80263_c41_g7_i1	254	247.868	-1.64092	0.172272	-9.52518	1.64757e-21	6.62186e-19	235	537	255	177	121	122
Mii75874_c2_g1_i1	260	58.3989	-3.0801	0.32363	-9.51736	1.77639e-21	7.12137e-19	58	124	88	16	10	5
Mii65058_c1_g2_i1	644	31.5416	3.8055	0.399997	9.5138	1.83818e-21	7.35027e-19	0	2	1	80	58	86
Mii50982_c1_g1_i1	487	43.0943	3.25564	0.342804	9.49711	2.15801e-21	8.60722e-19	5	6	3	84	95	110
Mii72449_c0_g1_i2	2161	49.9434	-3.06056	0.322349	-9.49455	2.21166e-21	8.7988e-19	58	111	68	15	7	5
Mii75822_c2_g1_i1	438	33.9546	3.65712	0.385302	9.49159	2.27543e-21	9.02961e-19	0	2	3	80	69	87
Mii22432_c0_g2_i1	537	32.4254	3.86241	0.406986	9.49028	2.30417e-21	9.12055e-19	0	0	2	57	78	91
Mii80277_c1_g1_i3	5439	132.099	-1.81672	0.191443	-9.48959	2.31944e-21	9.15786e-19	155	272	131	77	66	56
Mii78361_c2_g3_i1	338	28.3658	3.93152	0.415035	9.47272	2.72643e-21	1.07378e-18	0	1	0	65	61	77
Mii32078_c1_g1_i1	2748	51.6418	-2.76238	0.291729	-9.46899	2.82565e-21	1.11006e-18	85	119	48	16	14	8
Mii78472_c2_g3_i2	3997	61.7735	-2.77745	0.293379	-9.46711	2.87692e-21	1.12738e-18	80	134	75	25	6	14
Mii44966_c0_g1_i1	817	33.1805	3.6485	0.386232	9.44641	3.50648e-21	1.36989e-18	2	2	1	73	84	74
Mii63749_c0_g1_i3	904	44.5536	3.09294	0.327427	9.44621	3.51325e-21	1.36989e-18	4	13	2	95	101	103
Mii62034_c1_g1_i1	435	35.887	3.57855	0.380355	9.40845	5.03519e-21	1.95845e-18	2	1	3	72	76	98
Mii78995_c1_g2_i1	1280	48.8089	-3.13024	0.332764	-9.4068	5.11467e-21	1.98444e-18	57	100	70	13	4	7
Mii69826_c0_g2_i1	372	60.2851	-2.64124	0.28084	-9.40479	5.21357e-21	2.01782e-18	96	121	62	20	18	11
Mii80086_c2_g3_i2	550	66.3172	-2.71947	0.289194	-9.40362	5.2715e-21	2.03521e-18	89	142	78	30	14	7
Mii69352_c0_g1_i1	574	57.1706	-2.695	0.286694	-9.40028	5.44187e-21	2.09583e-18	72	122	70	18	14	12
Mii65236_c1_g1_i1	2123	56.7941	-2.90357	0.309006	-9.39648	5.64209e-21	2.16761e-18	58	130	79	18	11	7
Mii71549_c0_g1_i2	2050	45.1257	-3.21319	0.342269	-9.3879	6.12098e-21	2.34585e-18	49	102	65	12	4	4
Mii68004_c2_g3_i1	305	26.5379	3.97271	0.423314	9.3848	6.30388e-21	2.41005e-18	0	0	0	58	70	62
Mii80332_c1_g1_i6	1378	62.51	-2.70414	0.288225	-9.38204	6.47115e-21	2.46798e-18	68	139	82	23	14	11
Mii75530_c0_g1_i1	1265	119.718	-2.12026	0.226025	-9.38064	6.55706e-21	2.49467e-18	148	229	134	70	42	36
Mii73720_c2_g3_i1	2390	93.3263	-2.15939	0.230301	-9.37635	6.82952e-21	2.59204e-18	91	253	97	51	35	27
Mii63219_c0_g2_i1	1435	52.8228	-2.70957	0.289006	-9.37547	6.88662e-21	2.60407e-18	66	141	56	22	7	12
Mii49226_c0_g1_i3	610	38.9759	3.31617	0.353711	9.37535	6.89444e-21	2.60407e-18	3	4	4	85	83	95
Mii79874_c8_g1_i1	239	157.165	-1.71338	0.182861	-9.36984	7.26404e-21	2.73707e-18	172	325	157	103	79	71
Mii36687_c0_g1_i1	404	27.5321	3.89604	0.415993	9.36565	7.55821e-21	2.84109e-18	0	1	0	70	54	74
Mii71703_c0_g1_i4	644	79.6623	-2.67755	0.285948	-9.36379	7.69279e-21	2.88476e-18	92	135	114	23	19	20
Mii62111_c2_g4_i2	440	29.2911	3.79975	0.406195	9.35448	8.40123e-21	3.1429e-18	0	0	2	69	69	68
Mii62612_c0_g1_i3	1543	37.2061	3.36865	0.36019	9.35245	8.56433e-21	3.19629e-18	0	6	4	94	76	85
Mii67304_c1_g2_i2	1431	27.1161	3.88684	0.415887	9.34589	9.11194e-21	3.39259e-18	0	1	0	71	67	57
Mii80280_c1_g3_i2	1763	65.0284	-2.70112	0.289123	-9.34245	9.41293e-21	3.49634e-18	75	134	86	25	14	11
Mii40893_c0_g1_i1	811	38.128	-3.24681	0.347637	-9.33966	9.66409e-21	3.58115e-18	39	110	49	8	4	4
Mii76390_c1_g1_i1	4124	132.965	-1.98217	0.21233	-9.33532	1.00686e-20	3.72224e-18	133	283	153	76	53	51
Mii61085_c0_g1_i1	583	26.0295	3.95179	0.423821	9.3242	1.11821e-20	4.12415e-18	0	0	0	60	56	71
Mii71407_c3_g2_i5	856	42.3117	3.1433	0.337153	9.32307	1.13017e-20	4.1585e-18	4	9	3	85	94	104
Mii44293_c1_g1_i1	260	202.374	-3.04081	0.326229	-9.3211	1.15145e-20	4.22686e-18	244	435	272	54	33	27
Mii69030_c1_g1_i1	334	27.1932	3.86433	0.414662	9.31924	1.17177e-20	4.29141e-18	0	0	1	70	61	63
Mii80011_c1_g1_i2	2328	58.8456	-2.82605	0.303311	-9.31734	1.19293e-20	4.35873e-18	66	122	81	20	11	9
Mii74323_c0_g2_i2	3764	58.6959	-2.61198	0.280693	-9.30544	1.33433e-20	4.86405e-18	86	124	63	24	10	15
Mii56054_c0_g1_i1	252	43.7853	3.04356	0.327272	9.29977	1.40746e-20	5.11873e-18	5	8	5	94	100	95
Mii74624_c2_g1_i1	563	72.0383	2.36628	0.254541	9.29624	1.45506e-20	5.27958e-18	14	26	16	150	131	159
Mii63573_c0_g1_i1	1430	45.133	3.09379	0.333071	9.28868	1.56208e-20	5.65478e-18	4	10	4	82	103	114
Mii79871_c0_g1_i1	949	45.0081	-3.07185	0.331378	-9.26993	1.86264e-20	6.72731e-18	49	108	61	6	5	12
Mii79287_c8_g1_i1	407	29.3366	3.78949	0.408826	9.26921	1.87527e-20	6.75737e-18	2	0	0	68	55	85
Mii76209_c0_g1_i1	3831	69.6033	-2.36358	0.255002	-9.26885	1.88156e-20	6.76446e-18	94	163	69	37	20	15
Mii80259_c2_g2_i2	3856	329.132	-2.50573	0.27049	-9.26368	1.97498e-20	7.08409e-18	407	734	376	144	91	72
Mii60239_c2_g2_i1	1235	279.933	-1.45057	0.156625	-9.2614	2.01768e-20	7.22071e-18	275	601	260	212	179	137
Mii15895_c0_g2_i1	227	66.0324	-2.68353	0.289801	-9.25991	2.04607e-20	7.29693e-18	62	149	92	20	14	17
Mii74327_c1_g1_i1	1665	58.2726	-2.8368	0.306357	-9.25979	2.04829e-20	7.29693e-18	84	106	73	19	14	6
Mii79874_c8_g4_i1	245	219.916	-1.70584	0.184302	-9.25569	2.12853e-20	7.5656e-18	236	424	232	147	119	90
Mii61800_c1_g1_i1	229	53.7418	-2.74505	0.296739	-9.25069	2.23045e-20	7.90993e-18	70	131	60	24	9	7
Mii60799_c0_g1_i2	1442	64.5157	-2.87852	0.31127	-9.24765	2.29473e-20	8.11949e-18	58	134	99	15	15	11
Mii69837_c1_g1_i1	1134	96.4503	2.19378	0.237297	9.24487	2.35521e-20	8.31474e-18	20	54	17	162	181	235
Mii65366_c0_g1_i3	476	47.7452	2.91403	0.315701	9.23033	2.69788e-20	9.50307e-18	7	8	7	123	84	106
Mii45069_c0_g1_i1	334	44.9396	3.07257	0.332933	9.22879	2.73703e-20	9.61938e-18	4	6	7	90	96	109
Mii20196_c0_g1_i1	473	29.2549	3.72975	0.404212	9.22721	2.77775e-20	9.74066e-18	0	3	0	62	77	68
Mii77616_c1_g3_i2	2006	56.019	-2.7355	0.296796	-9.21677	3.06196e-20	1.07133e-17	64	119	74	17	10	14
Mii74171_c1_g1_i1	1828	53.0241	2.67987	0.290822	9.21482	3.11815e-20	1.08856e-17	10	15	7	112	114	112
Mii78597_c0_g1_i3	5771	3202.88	-2.65573	0.28865	-9.20051	3.56253e-20	1.24093e-17	3582	7275	4014	1142	833	643
Mii67515_c5_g1_i3	358	62.8495	-2.75652	0.299856	-9.19279	3.82788e-20	1.32786e-17	84	126	78	28	8	10
Mii51769_c0_g1_i1	765	51.3686	2.72594	0.296531	9.19276	3.82902e-20	1.32786e-17	9	12	8	118	100	111
Mii80332_c1_g1_i2	1342	59.3983	-2.66753	0.290326	-9.18804	4.00064e-20	1.38431e-17	64	144	74	25	13	9
Mii79682_c0_g1_i1	302	46.2411	2.93915	0.319919	9.18719	4.03227e-20	1.39218e-17	3	10	8	112	103	88
Mii98588_c0_g1_i1	464	28.3575	3.75116	0.408629	9.17987	4.31597e-20	1.48685e-17	1	0	1	59	70	70
Mii80272_c6_g1_i5	575	76.271	-2.57654	0.280695	-9.17916	4.34462e-20	1.49345e-17	73	163	106	30	18	17
Mii102488_c0_g1_i1	371	57.8235	-2.63188	0.286847	-9.17519	4.50766e-20	1.5461e-17	69	134	69	23	16	8
Mii75154_c4_g5_i4	929	76.6295	-2.45302	0.267462	-9.17147	4.66619e-20	1.59698e-17	94	142	97	29	18	25
Mii54128_c0_g2_i1	460	43.6244	3.04808	0.332614	9.16403	4.99952e-20	1.70733e-17	6	9	3	97	77	117
Mii25858_c0_g1_i1	695	76.4369	2.21395	0.241846	9.15438	5.46687e-20	1.86287e-17	16	40	14	147	149	165
Mii38493_c0_g3_i1	567	24.6796	3.88792	0.425465	9.13807	6.35797e-20	2.16182e-17	0	0	0	56	63	58
Mii39567_c0_g1_i1	229	38.9951	3.18457	0.348661	9.13371	6.61907e-20	2.24573e-17	3	6	4	80	84	97
Mii63385_c3_g1_i2	1490	93.6566	-2.25314	0.246842	-9.12786	6.98672e-20	2.36535e-17	104	208	108	55	27	23
Mii31916_c1_g1_i1	270	35.5009	3.51482	0.385293	9.12247	7.34333e-20	2.48072e-17	2	1	3	68	66	109
Mii79788_c2_g1_i13	1422	94.7696	-2.26319	0.248231	-9.11729	7.70238e-20	2.59641e-17	85	248	110	35	45	24
Mii79932_c2_g2_i3	2878	213.507	1.40705	0.154374	9.11457	7.89836e-20	2.65676e-17	92	172	60	357	380	383
Mii68575_c0_g1_i1	1940	54.7361	-2.727	0.29927	-9.11217	8.0754e-20	2.7105e-17	92	155	40	26	10	6
Mii76546_c1_g1_i3	517	58.9006	-2.65814	0.291842	-9.10816	8.3788e-20	2.80632e-17	75	133	69	27	7	13
Mii76546_c1_g1_i4	457	58.6003	-2.47554	0.271893	-9.10485	8.63864e-20	2.88718e-17	87	138	55	28	16	11
Mii75404_c1_g3_i4	3834	59.9755	-2.38028	0.261469	-9.10348	8.74845e-20	2.91766e-17	84	152	54	29	19	13
Mii70634_c0_g1_i1	4121	190.643	-2.97724	0.32708	-9.1025	8.82727e-20	2.9377e-17	238	449	236	58	33	22
Mii36687_c0_g2_i1	286	25.0165	3.87844	0.426396	9.09585	9.38532e-20	3.10806e-17	0	0	0	66	43	72
Mii79101_c3_g1_i3	297	55.3424	-2.66187	0.292647	-9.09583	9.38633e-20	3.10806e-17	64	119	71	17	14	12
Mii62105_c2_g1_i1	1709	49.9884	-2.66454	0.292946	-9.09569	9.39865e-20	3.10806e-17	69	110	56	17	11	11
Mii79612_c3_g1_i3	7728	512.241	-1.06272	0.116847	-9.09494	9.46399e-20	3.12308e-17	476	1073	408	456	364	367
Mii76896_c2_g3_i1	513	45.1084	-2.74902	0.302566	-9.08568	1.03048e-19	3.39341e-17	59	123	46	17	10	6
Mii52647_c0_g1_i1	1919	52.5365	2.59964	0.286183	9.08385	1.04798e-19	3.44377e-17	11	19	5	121	107	108
Mii79654_c4_g1_i1	233	83.1225	-2.30854	0.254261	-9.0794	1.09177e-19	3.5802e-17	111	152	96	40	25	23
Mii80062_c10_g1_i1	510	160.267	-1.75833	0.194014	-9.0629	1.27032e-19	4.15701e-17	196	336	148	111	89	52
Mii80214_c1_g1_i3	2656	73.9617	-2.50998	0.277121	-9.05735	1.33656e-19	4.36466e-17	87	136	98	29	20	17
Mii79381_c3_g2_i1	232	152.293	-1.7046	0.188418	-9.04695	1.4702e-19	4.79107e-17	171	309	151	103	80	63
Mii56227_c0_g1_i1	435	25.8388	3.77633	0.4177	9.04078	1.55563e-19	5.05895e-17	0	0	1	57	58	68
Mii68575_c0_g1_i4	2007	43.8258	-2.75425	0.30474	-9.03801	1.59548e-19	5.1778e-17	56	139	39	13	13	6
Mii7305_c0_g1_i1	602	26.7059	3.7145	0.411203	9.03326	1.66639e-19	5.39676e-17	1	1	0	71	50	70
Mii47665_c0_g1_i1	2036	61.8645	-2.55191	0.282665	-9.02805	1.74762e-19	5.64816e-17	74	126	78	22	19	12
Mii10203_c0_g1_i1	495	290.506	-2.83385	0.314078	-9.02275	1.83424e-19	5.9159e-17	323	713	365	99	49	51
Mii76228_c0_g1_i1	2629	137.818	-1.65301	0.183332	-9.01645	1.94279e-19	6.25314e-17	153	365	105	82	90	60
Mii79581_c9_g3_i2	251	142.541	-1.86153	0.206471	-9.01594	1.95186e-19	6.26946e-17	151	294	155	86	73	49
Mii69809_c1_g1_i1	355	25.0236	3.77796	0.419157	9.01324	2.00051e-19	6.4126e-17	0	1	0	58	58	63
Mii78274_c1_g1_i1	849	147.965	1.64942	0.183173	9.00471	2.16228e-19	6.91701e-17	58	98	37	298	218	302
Mii70577_c2_g1_i4	2917	74.3413	-2.19167	0.243561	-8.99846	2.28914e-19	7.30791e-17	93	160	79	38	25	23
Mii62903_c0_g1_i2	1533	52.0099	-2.63717	0.293263	-8.9925	2.41676e-19	7.69962e-17	61	133	59	23	8	11
Mii58581_c0_g1_i1	1389	60.4936	-2.82557	0.314276	-8.99074	2.45567e-19	7.80773e-17	72	107	87	20	13	7
Mii112986_c0_g1_i1	263	41.2043	-2.98067	0.331791	-8.98359	2.62075e-19	8.31575e-17	67	89	44	11	2	10
Mii79101_c1_g1_i2	345	86.7862	-2.28135	0.253958	-8.98318	2.63057e-19	8.33002e-17	108	167	102	46	27	21
Mii76814_c0_g2_i1	295	124.35	-1.81112	0.201938	-8.96868	3.00099e-19	9.48386e-17	164	252	113	88	50	51
Mii75555_c1_g1_i1	1977	59.4719	-2.642	0.294787	-8.9624	3.17691e-19	1.00196e-16	72	116	78	23	12	12
Mii78229_c0_g1_i1	3438	94.5068	-2.08054	0.232184	-8.96077	3.22421e-19	1.01484e-16	112	187	106	49	39	30
Mii72319_c4_g2_i10	317	102.7	-2.15472	0.240714	-8.95137	3.51097e-19	1.10288e-16	92	235	127	51	38	33
Mii54331_c0_g1_i1	400	42.2273	2.89789	0.323748	8.95106	3.52096e-19	1.10381e-16	5	10	5	94	86	97
Mii75442_c3_g2_i3	1041	134.633	-1.86791	0.209311	-8.9241	4.49331e-19	1.40582e-16	145	264	150	81	62	52
Mii80062_c10_g1_i4	472	119.846	-1.85641	0.208047	-8.92304	4.53664e-19	1.41655e-16	128	243	131	64	52	58
Mii118821_c0_g1_i1	318	65.8629	-2.46625	0.276442	-8.92138	4.60502e-19	1.43504e-16	71	169	75	34	10	18
Mii75866_c1_g4_i1	344	185.96	-1.60545	0.179969	-8.92071	4.63304e-19	1.44091e-16	204	388	176	145	98	78
Mii76896_c2_g4_i1	390	41.9872	-2.87583	0.322569	-8.9154	4.8606e-19	1.50869e-16	50	99	53	12	6	8
Mii72319_c3_g2_i4	266	409.888	-1.38559	0.155431	-8.91452	4.89927e-19	1.51769e-16	362	908	386	328	265	210
Mii77352_c0_g2_i1	337	85.1175	-2.22443	0.249805	-8.90467	5.35475e-19	1.65551e-16	105	185	92	52	25	20
Mii74171_c1_g1_i2	1893	53.8663	2.56982	0.289053	8.89049	6.08425e-19	1.87735e-16	13	18	5	106	110	125
Mii96278_c0_g1_i1	416	65.7332	-2.52514	0.284065	-8.88931	6.14913e-19	1.89364e-16	65	141	89	20	21	16
Mii56304_c0_g1_i1	446	29.0928	3.49882	0.393802	8.88471	6.40851e-19	1.96965e-16	0	4	1	62	71	70
Mii76359_c6_g2_i3	617	29.9809	3.48584	0.392728	8.87596	6.93337e-19	2.1268e-16	2	2	1	63	60	85
Mii78597_c0_g1_i4	3119	811.153	-2.79896	0.315637	-8.86766	7.47022e-19	2.28699e-16	1007	1853	989	291	151	129
Mii79654_c3_g1_i1	392	155.457	-1.70835	0.192753	-8.8629	7.79594e-19	2.38206e-16	169	337	151	116	78	58
Mii75027_c1_g2_i1	1251	68.0086	-2.52314	0.284998	-8.85321	8.50385e-19	2.59331e-16	96	147	73	38	13	10
Mii74068_c3_g1_i1	432	561.813	1.05305	0.119097	8.84194	9.40717e-19	2.86321e-16	272	577	190	1011	743	999
Mii80254_c0_g2_i1	497	43.1926	-2.80147	0.316896	-8.84035	9.54222e-19	2.89869e-16	68	92	46	15	7	7
Mii78680_c0_g1_i8	4544	62.3426	-2.57292	0.291057	-8.83992	9.57834e-19	2.90403e-16	70	122	84	24	14	14
Mii78274_c2_g1_i3	1230	175.256	1.5171	0.171656	8.83798	9.74644e-19	2.9493e-16	78	109	52	327	286	325
Mii52851_c0_g1_i1	904	45.7009	-2.79385	0.316299	-8.83296	1.01944e-18	3.07891e-16	63	99	54	18	6	7
Mii79581_c9_g2_i1	243	109.968	-1.74182	0.197253	-8.83037	1.04327e-18	3.1448e-16	126	248	101	75	47	52
Mii66576_c0_g1_i3	671	24.2432	3.70805	0.420106	8.82646	1.08043e-18	3.25058e-16	1	0	0	58	50	65
Mii79559_c8_g2_i1	292	126.661	-1.61712	0.183304	-8.82207	1.12364e-18	3.3741e-16	140	282	114	88	62	66
Mii75078_c1_g1_i1	914	77.301	-2.41135	0.273373	-8.82072	1.13729e-18	3.40856e-16	82	185	92	44	18	14
Mii44329_c0_g1_i1	290	73.7557	-2.35818	0.267599	-8.81234	1.22556e-18	3.66611e-16	88	143	91	32	26	16
Mii39741_c0_g1_i1	312	37.8517	-3.06742	0.348191	-8.80958	1.25619e-18	3.75058e-16	53	73	50	6	7	5
Mii80086_c2_g3_i1	478	57.129	-2.70113	0.306692	-8.80731	1.28183e-18	3.81625e-16	79	104	72	18	18	6
Mii49154_c0_g1_i1	2561	456.434	-2.89026	0.32817	-8.8072	1.28306e-18	3.81625e-16	528	1064	588	148	74	68
Mii64108_c0_g1_i1	2205	85.75	1.93929	0.220281	8.80374	1.32327e-18	3.92841e-16	24	49	20	176	163	158
Mii89765_c0_g1_i1	353	66.4781	-2.48927	0.282828	-8.80134	1.3519e-18	4.00582e-16	82	127	84	30	13	17
Mii72319_c3_g2_i1	317	300.838	-1.42743	0.162307	-8.79458	1.43578e-18	4.24632e-16	287	659	278	246	190	140
Mii67519_c0_g1_i3	764	40.7201	2.96318	0.336949	8.79415	1.44133e-18	4.25472e-16	5	7	5	80	84	103
Mii78680_c0_g1_i4	4661	67.8921	-2.37864	0.27058	-8.79087	1.48401e-18	4.37249e-16	79	155	78	37	17	14
Mii74975_c0_g1_i1	988	63.2482	-2.25621	0.257298	-8.76886	1.80482e-18	5.30773e-16	77	143	68	28	17	24
Mii66075_c0_g1_i1	2302	65.9708	-2.42459	0.276815	-8.7589	1.97171e-18	5.78766e-16	86	153	70	38	15	11
Mii62146_c0_g1_i1	444	26.0292	3.54948	0.405319	8.75725	2.0008e-18	5.86208e-16	1	1	1	71	53	60
Mii68239_c0_g1_i2	359	25.2914	3.62599	0.414389	8.75019	2.12992e-18	6.22873e-16	1	1	0	57	71	51
Mii72927_c0_g1_i3	3183	385.425	3.77188	0.431512	8.74107	2.30917e-18	6.74036e-16	6	6	13	919	844	967
Mii70385_c0_g1_i4	2597	47.41	-2.75966	0.315749	-8.74005	2.3301e-18	6.78883e-16	50	114	62	18	7	8
Mii72319_c4_g2_i11	573	308.639	-1.43588	0.164464	-8.73065	2.53209e-18	7.36365e-16	293	609	310	232	189	163
Mii76063_c1_g1_i5	2861	87.3333	-2.09865	0.240588	-8.72299	2.70954e-18	7.86509e-16	102	181	97	43	41	23
Mii51960_c1_g1_i1	753	49.9273	2.63587	0.302328	8.71858	2.81724e-18	8.16261e-16	12	18	2	104	94	124
Mii55453_c1_g1_i1	316	50.8238	-2.57694	0.29559	-8.71795	2.83279e-18	8.19251e-16	61	112	62	20	12	10
Mii74745_c0_g3_i1	2857	681.008	-1.12376	0.12893	-8.71605	2.88082e-18	8.31606e-16	698	1232	585	621	460	450
Mii73551_c0_g2_i5	562	23.2264	3.67792	0.422167	8.712	2.9857e-18	8.603e-16	0	1	0	53	53	60
Mii78472_c2_g3_i7	3989	65.6472	-2.5829	0.296567	-8.70932	3.05714e-18	8.79266e-16	91	127	78	34	11	10
Mii63749_c0_g1_i2	703	31.6355	3.26181	0.374597	8.70753	3.10569e-18	8.91595e-16	4	2	2	86	71	60
Mii55600_c0_g1_i2	1837	48.9186	-2.93368	0.337485	-8.69276	3.53726e-18	1.01364e-15	38	131	71	15	9	4
Mii62407_c1_g2_i1	229	55.5903	-2.71401	0.312564	-8.68307	3.8524e-18	1.10192e-15	47	132	80	16	9	15
Mii74745_c0_g3_i5	2680	650.085	-1.23057	0.141724	-8.68286	3.85941e-18	1.10192e-15	656	1178	598	578	397	410
Mii79682_c0_g1_i3	305	42.493	2.76605	0.3191	8.66829	4.38672e-18	1.2502e-15	7	9	6	100	93	82
Mii80214_c1_g2_i3	1738	79.8694	-2.47158	0.285202	-8.66606	4.47341e-18	1.27259e-15	95	137	108	38	18	17
Mii79763_c0_g2_i2	3282	67.4001	-2.29368	0.264704	-8.66509	4.51139e-18	1.28107e-15	71	149	82	31	20	20
Mii74687_c2_g1_i2	781	34.0427	3.08711	0.356452	8.66069	4.68933e-18	1.32919e-15	3	6	3	80	81	68
Mii51940_c0_g2_i1	1645	39.2008	-2.91489	0.336595	-8.65994	4.72023e-18	1.33553e-15	59	96	41	15	7	1
Mii53397_c0_g1_i4	574	107.808	-1.7957	0.207478	-8.65491	4.9332e-18	1.39328e-15	134	221	102	63	60	40
Mii73974_c0_g1_i1	419	53.6848	-2.66823	0.30883	-8.6398	5.63097e-18	1.58749e-15	72	110	65	25	6	10
Mii76750_c3_g2_i2	1434	32.3277	3.20746	0.371323	8.63794	5.72356e-18	1.61069e-15	4	3	2	76	59	85
Mii52805_c1_g1_i1	251	155.831	-2.95626	0.342282	-8.63692	5.77497e-18	1.62225e-15	298	392	118	49	22	19
Mii70831_c0_g1_i2	3023	62.2813	-2.47292	0.28644	-8.63329	5.96135e-18	1.67161e-15	69	124	82	24	19	13
Mii42638_c0_g1_i1	441	22.8854	3.63242	0.421365	8.62062	6.65954e-18	1.86405e-15	0	0	1	60	54	49
Mii52149_c2_g1_i1	1420	54.6019	-2.77758	0.322305	-8.61786	6.82191e-18	1.9061e-15	71	98	74	22	5	10
Mii63749_c0_g1_i4	680	42.953	2.83412	0.328876	8.61759	6.83795e-18	1.90718e-15	4	14	4	80	87	114
Mii71223_c0_g1_i1	2346	774.976	0.875523	0.101718	8.60737	7.47568e-18	2.08135e-15	455	797	279	1228	1186	1202
Mii62972_c1_g1_i1	3056	64.7542	-2.49135	0.289714	-8.59936	8.01641e-18	2.22794e-15	79	126	82	32	13	13
Mii80214_c1_g1_i6	2295	53.5596	-2.40148	0.27943	-8.5942	8.38462e-18	2.32615e-15	74	111	58	17	16	18
Mii58153_c0_g1_i2	272	45.5124	2.70352	0.314659	8.5919	8.55449e-18	2.36908e-15	6	17	4	91	86	118
Mii68794_c0_g1_i2	3274	45.391	-2.78337	0.323979	-8.5912	8.60681e-18	2.37937e-15	47	110	60	12	14	4
Mii49553_c0_g1_i1	409	24.3192	3.57333	0.415983	8.59008	8.69094e-18	2.39839e-15	1	1	0	52	51	69
Mii110332_c0_g1_i1	478	614.813	-3.08698	0.359463	-8.58777	8.86747e-18	2.44281e-15	710	1367	852	158	77	66
Mii56054_c0_g2_i2	285	42.9436	2.84495	0.331401	8.58461	9.11465e-18	2.5065e-15	6	5	8	105	76	98
Mii79863_c5_g2_i4	470	100.149	-1.81098	0.21119	-8.57511	9.89894e-18	2.71741e-15	118	202	101	54	44	51
Mii79881_c1_g1_i4	7292	206.62	-1.60047	0.186692	-8.57276	1.01033e-17	2.76865e-15	187	448	216	154	106	96
Mii55497_c1_g1_i1	465	23.3791	3.5685	0.416523	8.56736	1.05883e-17	2.89592e-15	0	2	0	59	58	50
Mii63970_c0_g2_i2	1668	33.9515	-3.01187	0.351559	-8.56718	1.06046e-17	2.89592e-15	42	82	43	10	4	3
Mii80214_c1_g2_i1	1545	59.8974	-2.33005	0.272017	-8.56583	1.07299e-17	2.92503e-15	91	118	60	25	22	14
Mii79654_c3_g1_i2	240	110.31	-1.87207	0.218648	-8.56206	1.1087e-17	3.01713e-15	127	220	117	72	48	39
Mii65366_c0_g2_i1	282	35.4095	3.06172	0.357827	8.55643	1.16413e-17	3.15973e-15	6	3	3	71	85	79
Mii69931_c0_g1_i1	1104	49.4218	-2.57431	0.300866	-8.55633	1.16513e-17	3.15973e-15	81	106	47	21	14	6
Mii50097_c1_g2_i1	257	99.8959	-1.72625	0.201773	-8.55544	1.17425e-17	3.17894e-15	123	232	83	61	58	40
Mii80701_c0_g1_i1	324	40.56	2.80631	0.328076	8.55385	1.19052e-17	3.21745e-15	6	12	3	79	90	96
Mii74105_c0_g1_i1	332	39.6735	-2.78282	0.325479	-8.54994	1.23151e-17	3.32248e-15	46	94	50	10	10	6
Mii75186_c1_g2_i2	464	37.8796	-2.92737	0.342656	-8.54317	1.3059e-17	3.51714e-15	40	90	52	10	4	7
Mii78937_c0_g1_i1	496	27.2554	3.40475	0.398677	8.54012	1.34081e-17	3.60496e-15	1	4	0	53	65	72
Mii75836_c9_g4_i3	642	49.9537	-2.49256	0.291924	-8.53838	1.3612e-17	3.65352e-15	71	105	54	18	17	9
Mii75716_c0_g1_i1	4764	69.608	-2.35432	0.275825	-8.53558	1.39452e-17	3.73656e-15	78	170	78	42	16	13
Mii78137_c2_g1_i1	10730	4832.04	-0.813187	0.0952866	-8.53412	1.4123e-17	3.77773e-15	4258	9389	3629	4909	3770	3968
Mii79249_c0_g1_i1	5446	361.57	-2.99426	0.351048	-8.52949	1.46997e-17	3.92528e-15	392	904	477	105	48	44
Mii80086_c2_g1_i1	2820	291.992	-2.60099	0.305158	-8.52341	1.54917e-17	4.12975e-15	360	629	355	112	76	52
Mii78283_c3_g1_i2	2108	48.344	-2.70976	0.317946	-8.52269	1.55892e-17	4.14868e-15	55	92	68	13	11	10
Mii75058_c0_g1_i1	298	386.781	-2.67284	0.313675	-8.52103	1.58137e-17	4.20129e-15	459	1001	436	159	76	65
Mii78499_c3_g1_i1	1959	51.1576	-2.58992	0.303999	-8.5195	1.60249e-17	4.2502e-15	59	105	67	19	13	9
Mii80232_c0_g1_i1	4641	135.666	-1.67466	0.196592	-8.51846	1.61693e-17	4.27434e-15	145	270	140	88	72	61
Mii56713_c0_g2_i1	813	188.008	1.32357	0.155376	8.51845	1.61704e-17	4.27434e-15	88	168	48	357	288	336
Mii62329_c0_g1_i1	720	51.0876	2.56777	0.301726	8.51027	1.73532e-17	4.57925e-15	7	15	10	106	87	129
Mii77701_c0_g1_i1	2432	75.3071	-2.34347	0.275392	-8.5096	1.74538e-17	4.59807e-15	108	149	80	43	23	11
Mii79581_c9_g6_i1	301	127.131	-1.64904	0.193858	-8.50645	1.79338e-17	4.71658e-15	152	256	118	85	73	53
Mii61839_c1_g2_i1	1069	46.1322	-2.77519	0.326544	-8.49867	1.9178e-17	5.03536e-15	50	108	61	19	4	8
Mii55489_c0_g1_i1	717	42.1358	-2.78761	0.328043	-8.49769	1.93403e-17	5.06948e-15	53	83	56	8	10	9
Mii53830_c0_g1_i1	4031	1421.32	0.720954	0.084979	8.48391	2.17752e-17	5.69819e-15	820	1688	556	2346	2121	1933
Mii16745_c0_g1_i1	286	20.5987	3.65989	0.431647	8.47891	2.27323e-17	5.93873e-15	0	0	0	48	47	53
Mii41090_c0_g1_i1	488	20.9917	3.66167	0.432032	8.47548	2.34122e-17	6.10617e-15	0	0	0	44	58	48
Mii65517_c0_g1_i1	1116	32.6622	3.03075	0.357754	8.4716	2.42053e-17	6.30254e-15	3	6	3	75	70	74
Mii68004_c1_g2_i1	315	33.5723	3.14229	0.370936	8.47123	2.42813e-17	6.31185e-15	0	5	5	67	67	91
Mii70634_c0_g1_i6	979	48.3276	-2.6484	0.312695	-8.4696	2.46235e-17	6.39022e-15	67	102	56	22	10	5
Mii80292_c2_g2_i4	2262	250.27	-1.59239	0.188065	-8.46721	2.51334e-17	6.51175e-15	260	445	271	178	139	114
Mii39203_c0_g1_i1	773	45.2764	-2.91921	0.344783	-8.46678	2.52269e-17	6.52518e-15	40	93	72	11	8	6
Mii78992_c2_g1_i1	1243	56.8491	-2.34595	0.277092	-8.46632	2.53262e-17	6.54009e-15	72	124	63	26	20	11
Mii78998_c2_g1_i7	10332	1130.62	-1.00157	0.118311	-8.46559	2.54869e-17	6.57075e-15	1051	2100	955	1049	827	823
Mii70426_c0_g1_i2	2852	56.1508	-2.4955	0.294846	-8.46376	2.58897e-17	6.66365e-15	79	107	65	20	21	8
Mii69809_c0_g3_i1	230	22.7551	3.58441	0.423729	8.4592	2.69218e-17	6.91794e-15	0	0	1	44	56	60
Mii50938_c0_g1_i1	1354	44.2956	-2.82661	0.334748	-8.44399	3.06697e-17	7.8681e-15	55	97	57	19	3	6
Mii125884_c0_g1_i1	254	61.5336	-2.43917	0.288886	-8.44336	3.08333e-17	7.89714e-15	75	120	77	30	15	12
Mii79681_c1_g1_i4	2517	68.9177	-2.19226	0.259725	-8.44067	3.15513e-17	8.06786e-15	71	154	82	33	25	20
Mii78937_c1_g1_i1	3083	259.368	3.60379	0.426979	8.44019	3.16811e-17	8.08787e-15	2	12	12	576	594	651
Mii69422_c1_g1_i1	1636	50.0566	-2.43209	0.288269	-8.43688	3.25922e-17	8.30693e-15	54	134	55	23	14	10
Mii80011_c1_g1_i8	2292	47.8171	-2.57906	0.305758	-8.43498	3.31268e-17	8.42947e-15	47	128	58	19	13	7
Mii72697_c2_g1_i1	492	47.1213	-2.6336	0.312283	-8.43337	3.35854e-17	8.53233e-15	52	103	62	17	7	12
Mii3554_c0_g2_i1	237	41.8284	-2.6885	0.318977	-8.42853	3.50049e-17	8.87856e-15	46	97	54	12	8	10
Mii79458_c2_g1_i1	305	43.9561	-2.61067	0.309857	-8.42542	3.59447e-17	9.1022e-15	55	112	48	20	5	10
Mii72572_c0_g1_i1	2368	381.215	-1.27171	0.151004	-8.42173	3.70957e-17	9.37851e-15	396	740	335	304	289	196
Mii78998_c2_g1_i6	10347	1127.59	-0.996987	0.118409	-8.41983	3.77046e-17	9.5171e-15	1032	2162	938	1050	877	771
Mii78277_c0_g1_i1	349	60.7167	-2.22133	0.263896	-8.41746	3.84737e-17	9.69563e-15	83	136	59	22	30	15
Mii68004_c1_g1_i2	240	24.5244	3.5044	0.416403	8.41589	3.89932e-17	9.79983e-15	0	0	2	45	63	62
Mii80266_c0_g1_i2	3184	74.2527	-2.13111	0.253226	-8.41583	3.90123e-17	9.79983e-15	84	153	86	38	29	21
Mii75100_c1_g14_i1	1180	136.485	-1.58183	0.188057	-8.41145	4.04985e-17	1.01569e-14	150	270	133	81	80	73
Mii79612_c3_g1_i5	7727	501.566	-1.04174	0.123886	-8.40886	4.14008e-17	1.03666e-14	462	1009	412	463	349	361
Mii73357_c2_g4_i1	365	21.9481	3.56217	0.423703	8.40723	4.1982e-17	1.04954e-14	0	0	1	48	52	55
Mii64646_c0_g1_i1	476	241.56	1.17043	0.139232	8.40629	4.23172e-17	1.05623e-14	120	217	77	467	361	388
Mii73647_c0_g1_i2	1858	28.3671	-3.30039	0.392688	-8.40462	4.29248e-17	1.06969e-14	36	56	42	5	0	3
Mii10154_c0_g1_i1	438	39.1314	2.73192	0.325068	8.40414	4.30996e-17	1.07234e-14	7	10	4	87	83	84
Mii72319_c4_g2_i5	282	156.088	-1.65537	0.197085	-8.39928	4.49239e-17	1.11596e-14	157	326	161	105	92	61
Mii72319_c4_g2_i4	237	136.594	-1.59799	0.190383	-8.39357	4.71601e-17	1.16966e-14	131	320	130	97	77	61
Mii63122_c0_g1_i2	1137	23.4047	3.50388	0.417605	8.39042	4.84395e-17	1.19949e-14	0	1	1	47	64	53
Mii72583_c0_g1_i3	3775	89.2783	-1.83952	0.219302	-8.38809	4.94115e-17	1.21976e-14	102	211	83	59	43	30
Mii80011_c1_g1_i5	2197	44.3506	-2.4952	0.29747	-8.38808	4.94137e-17	1.21976e-14	58	107	47	19	10	10
Mii38682_c0_g1_i2	328	49.5757	-2.60282	0.310349	-8.38674	4.99818e-17	1.23185e-14	49	113	67	19	11	9
Mii26629_c0_g1_i1	254	32.2241	3.15761	0.376981	8.37603	5.47437e-17	1.34709e-14	4	3	2	59	64	94
Mii78307_c1_g1_i1	1378	66.377	-2.41697	0.288686	-8.37233	5.64901e-17	1.38788e-14	69	146	85	35	11	17
Mii76063_c1_g1_i10	973	58.5417	-2.66916	0.318854	-8.37112	5.70754e-17	1.40007e-14	65	99	87	22	12	9
Mii79967_c0_g1_i3	773	50.767	-2.55704	0.305907	-8.35887	6.33239e-17	1.55092e-14	53	149	55	27	8	8
Mii70831_c0_g1_i1	3026	63.6952	-2.39334	0.286364	-8.35771	6.39491e-17	1.56379e-14	76	142	74	37	14	11
Mii61989_c0_g1_i1	691	20.6297	3.62166	0.433451	8.35541	6.52054e-17	1.59203e-14	0	0	0	39	50	58
Mii103891_c0_g1_i1	230	32.0757	-2.89675	0.346878	-8.35093	6.77252e-17	1.65098e-14	38	86	38	8	4	6
Mii38547_c0_g1_i1	304	309.648	-2.32359	0.278262	-8.35036	6.80568e-17	1.65649e-14	341	678	371	101	125	90
Mii76063_c1_g1_i6	2849	91.861	-1.97103	0.236111	-8.34791	6.94816e-17	1.68854e-14	108	171	104	49	32	41
Mii67804_c2_g2_i1	499	47.8502	-2.92138	0.349994	-8.34694	7.00556e-17	1.69986e-14	70	62	70	13	7	6
Mii7734_c0_g1_i1	624	287.055	-2.40092	0.287869	-8.34031	7.40946e-17	1.79508e-14	293	642	363	117	78	83
Mii76063_c1_g1_i9	2525	85.1949	-2.12985	0.255391	-8.33955	7.45717e-17	1.80385e-14	96	151	107	37	31	32
Mii79510_c3_g2_i1	236	142.848	-1.65717	0.19887	-8.33293	7.88683e-17	1.90484e-14	158	296	139	107	77	53
Mii80219_c1_g3_i1	355	47.4092	-2.511	0.301578	-8.3262	8.34764e-17	2.01304e-14	62	113	51	21	15	5
Mii41090_c0_g2_i1	488	21.7826	3.53737	0.424858	8.32602	8.36073e-17	2.0131e-14	0	0	1	55	39	61
Mii76864_c2_g2_i3	3198	90.905	-1.9334	0.232321	-8.32212	8.64041e-17	2.07725e-14	107	173	100	40	45	38
Mii78274_c2_g1_i2	1331	164.352	1.40266	0.168732	8.31293	9.33643e-17	2.24065e-14	72	116	53	308	259	295
Mii80263_c41_g6_i1	2971	1880.61	-1.67638	0.201663	-8.31278	9.34866e-17	2.24065e-14	2121	3770	1844	1286	979	841
Mii9625_c0_g1_i1	255	22.3983	3.47124	0.41774	8.30956	9.60543e-17	2.29867e-14	0	1	1	61	55	43
Mii79559_c8_g1_i1	264	135.414	-1.615	0.194378	-8.30854	9.68855e-17	2.31503e-14	146	268	136	87	79	62
Mii51673_c0_g1_i1	522	44.2235	-2.41316	0.29057	-8.30491	9.98943e-17	2.38329e-14	55	120	43	19	11	12
Mii52090_c1_g1_i1	396	32.4986	3.05771	0.368222	8.30398	1.0068e-16	2.3984e-14	3	2	5	74	79	63
Mii91174_c0_g1_i1	360	486.896	-3.05092	0.367437	-8.30325	1.01301e-16	2.40953e-14	502	1043	728	112	58	65
Mii69110_c3_g2_i1	747	22.2954	3.46668	0.417725	8.29896	1.05031e-16	2.49136e-14	0	1	1	51	55	51
Mii80157_c0_g1_i3	13416	379.659	-2.57098	0.309797	-8.29892	1.05059e-16	2.49136e-14	474	821	455	160	82	76
Mii57945_c0_g1_i1	2205	40.2972	-2.64338	0.318547	-8.29822	1.05684e-16	2.50237e-14	47	93	50	13	8	9
Mii15895_c0_g1_i1	230	45.277	-2.66126	0.32071	-8.29804	1.05846e-16	2.50243e-14	46	104	61	12	6	15
Mii79581_c9_g3_i3	351	106.273	-1.79986	0.217036	-8.29289	1.10525e-16	2.60913e-14	115	232	108	77	43	41
Mii70385_c0_g1_i6	1724	30.3846	-2.97513	0.358811	-8.29163	1.1171e-16	2.63313e-14	44	68	36	7	5	3
Mii63577_c0_g3_i3	3070	135.782	1.52384	0.183844	8.28881	1.1439e-16	2.69224e-14	62	89	36	252	251	227
Mii70798_c1_g2_i5	774	23.2103	3.40893	0.411283	8.28852	1.14666e-16	2.69469e-14	0	2	1	62	56	46
Mii73014_c0_g1_i6	5608	527.325	-0.963809	0.116314	-8.28625	1.1687e-16	2.74209e-14	511	1013	412	495	407	377
Mii78998_c2_g1_i5	10317	1126.74	-0.991618	0.119673	-8.28609	1.17032e-16	2.74209e-14	1009	2134	958	1011	860	826
Mii79874_c8_g3_i1	243	132.319	-1.58274	0.191098	-8.28235	1.2077e-16	2.82543e-14	147	280	122	96	78	55
Mii72449_c0_g1_i1	2107	45.5197	-2.68716	0.324545	-8.27978	1.23407e-16	2.88284e-14	52	98	60	10	17	5
Mii92137_c0_g1_i1	246	23.5502	3.39857	0.410508	8.27893	1.24286e-16	2.89905e-14	1	1	1	58	61	46
Mii65200_c0_g1_i3	739	44.4334	2.66794	0.322322	8.27726	1.26046e-16	2.93573e-14	7	12	6	81	82	121
Mii80307_c0_g1_i3	841	45.0902	-2.67566	0.32348	-8.27148	1.32302e-16	3.07322e-14	55	101	56	21	7	5
Mii7813_c0_g1_i1	291	60.8979	-2.29134	0.277018	-8.27145	1.32341e-16	3.07322e-14	80	129	66	35	16	13
Mii70098_c1_g1_i3	781	32.3118	-3.0555	0.369423	-8.27099	1.32847e-16	3.08041e-14	44	60	45	7	2	5
Mii59191_c0_g1_i1	722	68.2849	-2.08124	0.251786	-8.26591	1.38637e-16	3.20991e-14	73	155	76	37	23	24
Mii25090_c0_g1_i1	501	654.924	-2.80883	0.339991	-8.26149	1.43869e-16	3.32613e-14	714	1571	853	220	113	95
Mii75866_c1_g4_i2	244	107.69	-1.72327	0.208875	-8.25023	1.58087e-16	3.64947e-14	115	267	96	84	45	44
Mii77752_c1_g2_i1	2173	44.731	-2.79873	0.3394	-8.24612	1.63625e-16	3.77174e-14	54	81	64	16	8	4
Mii83417_c0_g1_i1	259	25.3248	3.37163	0.408892	8.24576	1.64121e-16	3.77762e-14	1	3	0	48	50	79
Mii22660_c0_g1_i1	412	73.7249	1.92693	0.233733	8.24416	1.66323e-16	3.82269e-14	21	47	14	164	141	127
Mii50139_c0_g1_i1	1843	52.2621	-2.27893	0.276437	-8.24392	1.66655e-16	3.82471e-14	61	124	57	25	15	15
Mii78680_c0_g1_i1	4717	70.5189	-2.37587	0.288268	-8.24188	1.69526e-16	3.88492e-14	78	125	96	22	29	16
Mii74018_c2_g3_i1	301	59.8329	-2.23399	0.271161	-8.23861	1.74223e-16	3.98672e-14	62	140	70	27	23	15
Mii68004_c2_g2_i1	226	19.7638	3.57775	0.43445	8.23512	1.79377e-16	4.09868e-14	0	0	0	45	38	59
Mii61416_c1_g2_i1	448	28.7645	3.18596	0.386971	8.23309	1.82447e-16	4.16277e-14	0	3	4	62	55	78
Mii67844_c2_g2_i2	663	293.565	1.12733	0.136943	8.23213	1.83906e-16	4.18995e-14	156	242	102	511	462	479
Mii76182_c3_g3_i1	1433	45.7468	-2.64343	0.321125	-8.23176	1.84481e-16	4.19695e-14	62	85	58	18	10	6
Mii73053_c0_g2_i1	330	309.501	-1.12136	0.136227	-8.23154	1.84817e-16	4.19851e-14	299	676	239	264	243	188
Mii78484_c1_g1_i1	1583	31.9672	2.92169	0.355194	8.22561	1.94196e-16	4.40518e-14	4	6	3	77	68	68
Mii56636_c0_g1_i1	1737	46.6725	-2.59638	0.316166	-8.2121	2.1736e-16	4.92353e-14	47	102	64	14	14	8
Mii73640_c2_g1_i1	1558	511.712	0.877872	0.106919	8.21064	2.20005e-16	4.97624e-14	274	594	175	855	752	797
Mii62903_c0_g1_i1	1513	49.4763	-2.54087	0.309512	-8.20928	2.22521e-16	5.02589e-14	51	112	65	22	10	9
Mii69679_c0_g1_i1	1385	85.1138	-2.09622	0.255364	-8.20874	2.23525e-16	5.04131e-14	86	201	96	57	23	25
Mii59472_c0_g1_i1	883	32.6792	-2.89539	0.352801	-8.20687	2.27028e-16	5.10798e-14	42	78	40	11	5	2
Mii78998_c2_g1_i9	10332	1136.87	-0.987009	0.120269	-8.20671	2.27324e-16	5.10798e-14	1026	2123	969	1038	847	844
Mii65978_c0_g1_i2	1164	35.814	2.784	0.339237	8.20664	2.27459e-16	5.10798e-14	7	6	4	86	74	74
Mii78142_c0_g2_i1	516	41.4343	-2.66732	0.325137	-8.2037	2.3309e-16	5.22696e-14	45	96	54	16	8	6
Mii74105_c1_g1_i1	2355	737.768	-2.56838	0.31336	-8.19626	2.47981e-16	5.55293e-14	810	1531	979	267	177	166
Mii80292_c2_g3_i1	1062	39.6786	-2.65499	0.324013	-8.19409	2.52496e-16	5.64596e-14	55	82	47	15	7	7
Mii73014_c0_g1_i2	5623	536.663	-0.994442	0.121378	-8.19291	2.54993e-16	5.69368e-14	524	1016	430	499	416	367
Mii55497_c0_g1_i1	260	19.1706	3.55952	0.434539	8.19149	2.58018e-16	5.75303e-14	0	0	0	46	39	53
Mii78771_c1_g1_i1	2140	58.8996	-2.58906	0.316086	-8.191	2.5907e-16	5.76828e-14	55	109	90	21	14	11
Mii78884_c0_g1_i5	2547	42.2523	-2.64562	0.323039	-8.18978	2.61703e-16	5.81865e-14	53	83	55	15	8	8
Mii71703_c0_g1_i5	513	54.0701	-2.64163	0.322783	-8.1839	2.74804e-16	6.10126e-14	55	102	80	18	6	16
Mii77982_c1_g5_i2	313	110.879	-1.65286	0.202	-8.18249	2.78036e-16	6.1643e-14	121	224	111	70	56	56
Mii66473_c3_g2_i5	766	50.3706	-2.43102	0.297133	-8.18158	2.80151e-16	6.20241e-14	65	122	53	28	7	12
Mii77215_c1_g2_i2	2181	41.7709	-2.76481	0.33821	-8.17482	2.96306e-16	6.55082e-14	51	82	57	16	7	4
Mii53397_c0_g1_i3	520	85.9733	-1.92268	0.235266	-8.17235	3.02432e-16	6.67685e-14	101	178	90	57	33	29
Mii77919_c0_g2_i1	1445	24.5222	3.27478	0.400799	8.17064	3.06752e-16	6.76269e-14	0	4	1	72	51	50
Mii70798_c1_g1_i1	541	24.4574	3.25947	0.398995	8.1692	3.10433e-16	6.83425e-14	1	3	1	59	58	53
Mii80323_c1_g1_i1	3944	233.524	-2.63095	0.3224	-8.16054	3.33534e-16	7.33251e-14	309	484	281	80	65	35
Mii74624_c2_g1_i2	531	89.539	1.97146	0.241656	8.1581	3.40329e-16	7.4714e-14	17	43	29	176	149	193
Mii50218_c2_g1_i1	256	29.8444	2.98317	0.365725	8.15687	3.43822e-16	7.53755e-14	2	6	3	74	61	66
Mii25371_c0_g1_i1	319	35.7814	-2.65252	0.325472	-8.14978	3.64597e-16	7.98182e-14	56	80	36	9	8	9
Mii74105_c1_g1_i2	2382	2497.38	-2.45346	0.301226	-8.1449	3.79593e-16	8.29853e-14	2513	5691	3201	984	696	613
Mii70376_c0_g1_i2	650	4177.55	-2.33067	0.28648	-8.13554	4.10101e-16	8.95299e-14	4290	9152	5233	1763	1288	1214
Mii79949_c0_g1_i1	371	31.2752	2.9616	0.364274	8.13015	4.28774e-16	9.34762e-14	2	7	3	65	62	82
Mii18848_c0_g1_i1	379	366.251	-2.98353	0.367005	-8.1294	4.31411e-16	9.39206e-14	404	794	523	98	45	45
Mii79858_c18_g1_i1	361	22.1162	3.40035	0.418337	8.12825	4.35545e-16	9.4689e-14	0	0	2	55	42	58
Mii80246_c3_g1_i3	2786	171.468	-1.6525	0.203463	-8.12185	4.59123e-16	9.96768e-14	186	352	170	128	101	56
Mii57076_c1_g1_i1	474	22.1885	3.3526	0.412863	8.12035	4.6483e-16	1.00681e-13	0	2	1	61	45	51
Mii79381_c3_g1_i1	320	108.696	-1.65546	0.203867	-8.1203	4.65035e-16	1.00681e-13	128	219	103	76	56	47
Mii79863_c5_g2_i6	406	79.2916	-1.88243	0.231949	-8.11574	4.82832e-16	1.0439e-13	100	167	76	44	42	26
Mii76844_c1_g2_i9	783	61.2799	-2.4348	0.300029	-8.11523	4.84866e-16	1.04686e-13	74	115	79	31	16	9
Mii73640_c3_g2_i2	1892	512.842	0.912136	0.112409	8.11445	4.87992e-16	1.05216e-13	272	601	165	827	783	818
Mii70798_c1_g2_i6	641	21.0181	3.4072	0.419925	8.11384	4.90458e-16	1.05602e-13	1	1	0	51	51	47
Mii72749_c6_g1_i2	258	267.007	-2.54121	0.3133	-8.1111	5.01629e-16	1.07859e-13	340	487	344	96	59	69
Mii54718_c0_g1_i1	1481	50.4747	-2.39769	0.295796	-8.10589	5.23604e-16	1.1243e-13	63	122	54	26	16	6
Mii79605_c0_g1_i1	4069	77.6815	-1.86764	0.230466	-8.10375	5.32921e-16	1.14274e-13	96	162	76	47	33	31
Mii89704_c0_g1_i1	279	34.5077	-2.9609	0.365459	-8.10187	5.412e-16	1.15891e-13	31	88	50	10	1	6
Mii49998_c0_g1_i1	855	26.9395	-3.15171	0.389433	-8.09307	5.81809e-16	1.24417e-13	35	52	39	3	2	4
Mii66671_c1_g1_i1	288	48.8115	-2.55233	0.315421	-8.09182	5.87811e-16	1.25529e-13	53	103	65	15	18	6
Mii118333_c0_g1_i1	230	80.7617	-2.22585	0.275254	-8.08651	6.13999e-16	1.30943e-13	91	158	100	49	24	16
Mii65255_c1_g5_i6	453	209.597	1.20871	0.14948	8.08611	6.16021e-16	1.31196e-13	109	197	54	374	331	361
Mii65893_c1_g1_i1	1173	678.34	-2.4126	0.298398	-8.08517	6.20774e-16	1.32029e-13	726	1437	868	264	211	166
Mii54278_c1_g1_i2	834	30.9574	-2.91594	0.360753	-8.08294	6.32245e-16	1.34263e-13	32	78	42	8	4	4
Mii25883_c0_g1_i1	519	82.1415	1.8165	0.224737	8.08279	6.32993e-16	1.34263e-13	30	45	19	157	156	153
Mii80265_c13_g3_i1	1657	171.237	-1.308	0.16183	-8.08254	6.34327e-16	1.34364e-13	216	366	117	143	107	100
Mii25514_c0_g1_i1	602	21.4643	3.38561	0.418987	8.08046	6.45223e-16	1.36488e-13	1	0	1	53	42	56
Mii74327_c2_g1_i2	1324	37.7867	-2.69643	0.333714	-8.08006	6.4734e-16	1.36751e-13	52	80	45	13	10	3
Mii116134_c0_g1_i1	662	203.806	-1.26816	0.15699	-8.07797	6.5856e-16	1.38934e-13	196	440	175	163	141	118
Mii50285_c0_g1_i1	494	29.4364	-3.01709	0.373569	-8.07639	6.67139e-16	1.40555e-13	48	57	35	8	4	1
Mii55267_c1_g1_i2	273	29.5509	2.95785	0.366268	8.07564	6.71221e-16	1.41225e-13	4	5	2	67	66	65
Mii48052_c0_g1_i1	361	107.838	3.01871	0.373842	8.0748	6.75846e-16	1.42007e-13	15	8	10	241	238	244
Mii80254_c0_g1_i1	4421	825.098	-2.55675	0.316739	-8.0721	6.90974e-16	1.44992e-13	1001	2022	931	365	178	149
Mii79101_c3_g1_i2	246	43.3731	-2.60437	0.32272	-8.07006	7.0261e-16	1.47044e-13	50	91	57	16	5	12
Mii103813_c0_g1_i1	296	35.6099	-2.60816	0.323189	-8.07006	7.02631e-16	1.47044e-13	50	89	36	9	12	6
Mii79819_c0_g1_i2	8146	520.394	-1.06578	0.13208	-8.06916	7.07826e-16	1.47934e-13	490	1017	437	499	369	336
Mii80134_c0_g1_i1	11966	784.693	-0.976517	0.121064	-8.06612	7.25661e-16	1.51459e-13	712	1588	622	752	632	513
Mii80145_c4_g2_i3	2346	90.3501	-1.95666	0.242646	-8.06384	7.39339e-16	1.54109e-13	93	180	107	54	32	35
Mii79429_c0_g3_i2	2299	47.2645	-2.45001	0.30384	-8.06349	7.41491e-16	1.54352e-13	56	122	51	26	10	7
Mii77919_c0_g2_i5	1457	18.2412	3.51159	0.435547	8.06248	7.47627e-16	1.55423e-13	0	0	0	50	43	39
Mii76814_c1_g1_i1	4312	398.485	-2.75418	0.341644	-8.06156	7.53257e-16	1.56386e-13	461	998	484	148	60	63
Mii113314_c0_g1_i1	511	19.8307	-3.38141	0.419523	-8.06013	7.62141e-16	1.58021e-13	24	52	27	2	0	1
Mii79057_c1_g3_i2	2801	63.4836	-2.29689	0.285164	-8.05465	7.97083e-16	1.65048e-13	70	116	84	23	24	17
Mii67663_c2_g1_i1	382	68.3029	-1.90798	0.236963	-8.05183	8.15678e-16	1.68675e-13	80	157	66	39	28	28
Mii68410_c0_g2_i2	1572	30.3378	-2.81687	0.349857	-8.05149	8.17949e-16	1.68922e-13	38	79	35	9	4	5
Mii80332_c5_g1_i3	4267	232.486	-1.41587	0.17587	-8.05068	8.23346e-16	1.69813e-13	247	405	233	155	148	136
Mii61161_c0_g1_i3	681	20.5278	3.39568	0.421865	8.04921	8.33281e-16	1.71636e-13	0	2	0	48	49	49
Mii79249_c0_g2_i1	6498	401.747	-2.64746	0.328938	-8.04851	8.38106e-16	1.72404e-13	374	956	550	133	89	80
Mii79755_c0_g1_i1	9024	993.357	-2.59255	0.322151	-8.04762	8.44219e-16	1.73433e-13	1150	2290	1217	412	192	197
Mii76738_c4_g2_i5	859	22.9235	3.27443	0.407095	8.04339	8.73836e-16	1.79283e-13	2	2	0	58	45	58
Mii75874_c4_g2_i2	4122	374.891	-2.53602	0.315358	-8.04174	8.85712e-16	1.81482e-13	429	753	492	138	100	77
Mii39470_c0_g1_i1	939	29.5653	-2.87741	0.35782	-8.04152	8.87293e-16	1.81568e-13	33	78	37	7	5	4
Mii96862_c0_g1_i1	234	48.2725	-2.5071	0.3118	-8.04073	8.93076e-16	1.82514e-13	46	120	62	22	7	12
Mii80327_c0_g2_i8	11470	441.123	-2.51522	0.313015	-8.03546	9.32302e-16	1.90282e-13	541	990	518	192	105	85
Mii75836_c9_g3_i1	258	52.0757	-2.42605	0.301961	-8.03432	9.4099e-16	1.91577e-13	91	102	47	25	16	7
Mii39421_c0_g1_i1	617	37.0228	-2.55018	0.317411	-8.03431	9.41092e-16	1.91577e-13	47	96	39	14	10	6
Mii65766_c0_g2_i1	332	39.7521	-2.44183	0.303962	-8.03332	9.48689e-16	1.92873e-13	53	102	39	17	10	9
Mii76738_c4_g3_i2	595	20.3977	3.38963	0.422035	8.03163	9.61844e-16	1.95294e-13	0	2	0	55	49	42
Mii25090_c0_g2_i1	297	270.594	-2.77549	0.346248	-8.01591	1.09328e-15	2.21695e-13	311	667	336	97	37	44
Mii66946_c0_g1_i1	461	4777.33	-2.2876	0.285602	-8.00974	1.1495e-15	2.32583e-13	4945	10456	5899	2093	1583	1351
Mii79573_c2_g2_i3	8293	2686.78	-0.806074	0.100637	-8.00969	1.14995e-15	2.32583e-13	2437	5239	1959	2874	2210	1981
Mii51960_c1_g1_i2	714	45.1681	2.45115	0.306057	8.0088	1.15829e-15	2.33968e-13	6	16	9	97	78	108
Mii76460_c2_g1_i1	949	18.2832	3.49427	0.436339	8.00814	1.16456e-15	2.34933e-13	0	0	0	41	50	40
Mii80332_c5_g1_i5	4296	233.518	-1.47496	0.184305	-8.00283	1.21587e-15	2.44969e-13	249	416	237	190	126	115
Mii76448_c0_g1_i2	1871	135.811	-3.04855	0.380991	-8.00163	1.22778e-15	2.47051e-13	151	325	187	35	13	13
Mii74032_c0_g1_i4	1789	52.5078	-2.50258	0.312821	-8.00005	1.24365e-15	2.49923e-13	57	121	66	28	11	6
Mii57527_c0_g1_i1	761	19.1646	3.43263	0.429156	7.99856	1.25885e-15	2.52653e-13	0	1	0	45	44	48
Mii75836_c9_g6_i1	642	42.144	-2.39836	0.299883	-7.99765	1.26818e-15	2.542e-13	60	99	41	11	17	11
Mii105437_c0_g1_i1	226	51.1531	-2.48737	0.311057	-7.99651	1.27996e-15	2.56235e-13	59	105	66	24	6	14
Mii80072_c2_g1_i1	11263	1873.2	-0.705318	0.0882192	-7.99506	1.29508e-15	2.5893e-13	1687	3554	1310	1928	1651	1551
Mii80186_c0_g1_i2	11774	828.583	-0.856311	0.107133	-7.99299	1.31703e-15	2.62983e-13	774	1712	579	826	715	582
Mii40229_c0_g1_i1	390	150.225	3.26109	0.408871	7.97583	1.51359e-15	3.01847e-13	2	17	12	392	355	295
Mii74656_c1_g1_i1	1246	45.8765	-2.57286	0.323006	-7.96534	1.64766e-15	3.28167e-13	53	93	61	21	8	7
Mii77668_c1_g2_i2	2806	89.7151	-2.03295	0.255511	-7.95641	1.77103e-15	3.52291e-13	82	199	109	45	45	23
Mii74845_c2_g1_i1	432	17.7196	3.47344	0.436574	7.95612	1.77514e-15	3.52662e-13	0	0	0	47	43	38
Mii75551_c1_g5_i1	2403	70.9511	-2.10373	0.264468	-7.95454	1.79797e-15	3.56745e-13	95	132	77	41	27	17
Mii80266_c2_g2_i4	1902	47.1708	-2.49642	0.31402	-7.94987	1.86702e-15	3.69583e-13	48	100	64	11	17	11
Mii96749_c0_g1_i1	224	40.4378	-2.64982	0.333316	-7.94985	1.86739e-15	3.69583e-13	49	86	52	16	10	3
Mii71407_c3_g2_i2	616	30.5162	2.85924	0.359791	7.94694	1.91174e-15	3.77884e-13	3	7	3	64	69	69
Mii77215_c1_g2_i3	2180	38.2904	-2.56947	0.323386	-7.94551	1.93388e-15	3.81778e-13	52	83	44	16	6	8
Mii68397_c3_g5_i3	1956	43.7739	-2.53637	0.319542	-7.93753	2.06244e-15	4.06646e-13	51	108	51	22	10	4
Mii72677_c2_g1_i3	899	48.0358	-2.31586	0.291774	-7.93718	2.06836e-15	4.07301e-13	49	120	56	20	17	11
Mii65938_c0_g1_i1	437	40.3459	2.74647	0.346157	7.93415	2.11936e-15	4.1682e-13	10	3	5	75	100	84
Mii72677_c2_g1_i5	3222	231.891	-1.42542	0.179662	-7.93394	2.12299e-15	4.17011e-13	203	485	235	159	158	120
Mii20944_c0_g1_i1	408	41.2531	-2.59389	0.32714	-7.92898	2.20949e-15	4.33459e-13	61	91	44	21	4	7
Mii76937_c0_g4_i1	322	590.38	-1.99339	0.251705	-7.91953	2.38408e-15	4.67125e-13	753	1289	570	385	207	196
Mii77752_c0_g1_i1	2003	42.283	-2.47878	0.313005	-7.91929	2.38863e-15	4.67431e-13	52	88	52	17	10	9
Mii65190_c1_g1_i1	1436	34.2456	2.70001	0.34103	7.91721	2.42901e-15	4.74741e-13	3	10	5	78	65	80
Mii50084_c0_g1_i1	398	25.5531	3.10951	0.393029	7.91165	2.54e-15	4.95816e-13	1	5	1	50	56	69
Mii73357_c2_g3_i1	232	21.0702	3.32737	0.420642	7.9102	2.56977e-15	5.01003e-13	0	0	2	49	41	57
Mii80323_c1_g1_i2	3971	232.998	-2.53113	0.320074	-7.90795	2.61668e-15	5.09514e-13	296	478	284	93	61	41
Mii57703_c0_g1_i1	596	52.5658	-2.23683	0.282916	-7.90635	2.6505e-15	5.15461e-13	64	113	59	24	21	11
Mii78329_c2_g1_i1	2922	58.1161	-2.27569	0.287852	-7.90576	2.66299e-15	5.17072e-13	78	105	68	29	19	12
Mii49419_c0_g1_i2	378	17.4943	3.45534	0.437072	7.90565	2.66539e-15	5.17072e-13	0	0	0	43	39	44
Mii78624_c1_g1_i1	1029	105.695	-1.68199	0.212849	-7.90228	2.73844e-15	5.30588e-13	124	201	106	71	54	45
Mii75404_c1_g2_i1	482	48.3316	-2.35517	0.298257	-7.89644	2.8698e-15	5.55352e-13	55	98	61	19	14	13
Mii79863_c5_g1_i3	520	104.107	-1.56971	0.198816	-7.89525	2.89723e-15	5.5997e-13	122	239	85	77	61	44
Mii79253_c1_g1_i1	424	20.4758	3.34076	0.423274	7.89267	2.95798e-15	5.71007e-13	1	1	0	62	33	52
Mii76930_c0_g2_i1	1106	33.2902	-2.75192	0.348732	-7.89121	2.99262e-15	5.76983e-13	43	75	41	13	3	5
Mii76359_c6_g2_i2	584	25.6863	3.06244	0.388145	7.88993	3.02355e-15	5.8223e-13	3	2	2	58	53	63
Mii76083_c0_g1_i1	3968	226.206	-2.37165	0.300605	-7.8896	3.03156e-15	5.82765e-13	243	565	259	110	60	51
Mii41862_c0_g1_i4	715	190.981	-1.35951	0.172321	-7.88939	3.03661e-15	5.82765e-13	194	391	173	149	133	93
Mii66473_c3_g2_i2	667	35.3334	-2.69725	0.341885	-7.88936	3.03748e-15	5.82765e-13	33	101	44	13	7	4
Mii98555_c0_g1_i1	398	23.4556	3.28809	0.416905	7.88691	3.09763e-15	5.93578e-13	0	1	2	37	54	70
Mii55648_c0_g1_i4	235	27.1815	-2.83939	0.360337	-7.87981	3.27874e-15	6.27516e-13	36	72	30	5	4	6
Mii76762_c0_g1_i2	1917	60.3158	-2.10211	0.2669	-7.87602	3.37964e-15	6.46039e-13	66	137	67	32	25	15
Mii72319_c3_g2_i6	461	290.146	-1.37118	0.174208	-7.87092	3.52038e-15	6.72122e-13	247	590	297	228	176	163
Mii38926_c0_g1_i1	519	35.3621	2.64998	0.336755	7.86918	3.56976e-15	6.80721e-13	6	14	1	76	71	85
Mii102173_c0_g1_i1	900	65.1883	3.35972	0.427045	7.86736	3.6221e-15	6.89863e-13	0	4	4	194	87	182
Mii65321_c0_g1_i4	740	18.0759	3.44663	0.438178	7.86582	3.66696e-15	6.97559e-13	0	0	0	35	39	55
Mii79620_c0_g2_i1	243	52.3391	-2.37752	0.302522	-7.85901	3.87192e-15	7.35655e-13	55	129	62	29	14	7
Mii46894_c0_g1_i1	357	33.4642	-2.68174	0.341668	-7.84896	4.19509e-15	7.96091e-13	36	91	40	13	6	4
Mii55267_c1_g1_i1	270	30.8838	2.79287	0.355906	7.84722	4.25356e-15	8.06212e-13	6	6	2	70	62	72
Mii79976_c0_g1_i5	1922	54.4293	-2.25993	0.288037	-7.84597	4.29624e-15	8.13318e-13	72	105	62	29	12	16
Mii61816_c0_g1_i3	611	489.698	-1.99805	0.254819	-7.84106	4.46757e-15	8.44731e-13	576	1092	499	314	171	164
Mii79407_c2_g1_i3	1219	35.1284	-2.67647	0.341409	-7.83948	4.52422e-15	8.54412e-13	60	66	37	12	7	5
Mii73551_c1_g1_i4	748	25.8164	3.00768	0.383699	7.83864	4.55463e-15	8.5912e-13	1	4	3	65	55	55
Mii59958_c5_g5_i1	246	331.699	0.944414	0.12051	7.83683	4.62073e-15	8.70541e-13	174	350	118	577	491	514
Mii78210_c4_g5_i1	1466	35.1534	-2.61211	0.334099	-7.81837	5.35122e-15	1.00695e-12	45	82	41	15	6	5
Mii77352_c3_g1_i4	4808	696.739	-0.979395	0.125299	-7.81645	5.43325e-15	1.02116e-12	735	1237	544	706	508	470
Mii65267_c2_g1_i1	444	24.0463	3.07958	0.394346	7.80933	5.74913e-15	1.07924e-12	1	6	0	57	55	55
Mii61676_c1_g1_i1	963	29.2944	-2.88093	0.369148	-7.80425	5.98545e-15	1.12226e-12	35	67	39	9	5	1
Mii65200_c0_g1_i1	661	27.521	2.98426	0.382539	7.80118	6.13293e-15	1.14854e-12	4	4	1	51	59	75
Mii70536_c0_g1_i2	1185	214.021	1.16612	0.149722	7.78854	6.77887e-15	1.26799e-12	116	194	60	410	310	360
Mii79884_c0_g1_i2	13388	567.476	-2.58535	0.332143	-7.78385	7.03494e-15	1.31432e-12	615	1298	730	223	123	101
Mii76448_c0_g1_i1	3086	281.033	-2.96009	0.380864	-7.77204	7.72298e-15	1.44115e-12	306	695	379	79	30	29
Mii68958_c0_g1_i4	2353	46.1932	-2.46241	0.316942	-7.76929	7.89251e-15	1.47103e-12	48	104	60	23	9	8
Mii72224_c1_g2_i1	224	28.0593	2.88066	0.371071	7.76309	8.2886e-15	1.54302e-12	2	6	3	77	62	50
Mii42315_c0_g1_i1	573	215.119	1.17022	0.150769	7.76172	8.37879e-15	1.55796e-12	122	194	56	387	351	346
Mii79318_c0_g2_i1	3205	93.6554	-1.682	0.216761	-7.75968	8.51416e-15	1.58125e-12	104	192	93	47	56	46
Mii77352_c0_g1_i1	337	50.7084	-2.20059	0.283605	-7.75937	8.53555e-15	1.58335e-12	76	106	48	28	12	16
Mii79728_c2_g1_i2	8369	943.519	-1.01139	0.130361	-7.75836	8.60346e-15	1.59381e-12	792	1889	814	888	695	658
Mii79503_c1_g1_i2	6558	275.57	-1.41645	0.182574	-7.75823	8.61226e-15	1.59381e-12	237	562	286	218	172	135
Mii74263_c6_g1_i1	350	44.5749	-2.44603	0.315484	-7.75327	8.95563e-15	1.6554e-12	49	97	57	21	7	11
Mii80234_c2_g1_i1	7947	2250.13	-2.57215	0.331781	-7.75257	9.00542e-15	1.66264e-12	2689	5268	2681	930	482	388
Mii80143_c2_g6_i4	868	67.8525	-2.10893	0.272108	-7.75033	9.16533e-15	1.69017e-12	67	156	80	43	18	20
Mii76466_c0_g1_i1	4135	90.0623	-1.82106	0.23497	-7.75018	9.17607e-15	1.69017e-12	88	188	102	50	47	34
Mii115589_c0_g1_i1	258	2267.66	-2.34098	0.302393	-7.74151	9.82457e-15	1.80749e-12	2153	5390	2850	967	693	585
Mii80332_c4_g1_i1	2770	155.625	-2.59891	0.3358	-7.73947	9.98292e-15	1.83447e-12	222	324	177	65	29	26
Mii72319_c3_g2_i10	294	158.149	-1.53378	0.19822	-7.73774	1.01196e-14	1.85741e-12	157	326	158	107	108	64
Mii46889_c0_g1_i1	315	220.241	-2.81609	0.363994	-7.73665	1.0207e-14	1.87125e-12	233	452	322	63	33	34
Mii80246_c3_g1_i1	813	84.6343	-1.73085	0.223758	-7.7354	1.03078e-14	1.88753e-12	116	175	71	61	37	35
Mii79500_c0_g2_i5	752	79.6335	-1.82265	0.235864	-7.72756	1.0963e-14	2.00516e-12	110	186	62	51	45	22
Mii51329_c0_g1_i1	235	16.6633	3.39088	0.438854	7.72667	1.10401e-14	2.01691e-12	0	0	0	48	33	40
Mii64367_c1_g1_i1	637	36.1851	-2.54413	0.329298	-7.72593	1.11038e-14	2.0262e-12	50	72	43	11	10	7
Mii72453_c1_g1_i3	1360	33.4114	-2.57618	0.333784	-7.71811	1.18066e-14	2.15193e-12	49	73	36	8	6	11
Mii78659_c0_g2_i1	4054	246.448	-2.84259	0.368533	-7.71326	1.22646e-14	2.23282e-12	297	536	329	77	36	28
Mii79863_c5_g2_i1	326	72.0199	-1.99742	0.258988	-7.71241	1.2346e-14	2.24502e-12	85	143	80	46	27	20
Mii79957_c4_g1_i4	307	164.471	1.24574	0.161547	7.71134	1.24505e-14	2.2614e-12	80	156	42	305	258	283
Mii80219_c0_g1_i5	498	26.1112	-2.9644	0.384736	-7.70504	1.30804e-14	2.37307e-12	38	48	35	5	4	2
Mii36403_c0_g1_i1	569	682.907	-2.80281	0.363779	-7.70473	1.31122e-14	2.37609e-12	729	1380	998	201	100	110
Mii68307_c0_g2_i1	934	26.0192	-2.87597	0.373307	-7.70405	1.31823e-14	2.38415e-12	32	63	33	7	3	3
Mii79345_c1_g1_i1	8646	963.182	-0.816453	0.105978	-7.704	1.31872e-14	2.38415e-12	859	1922	704	971	825	714
Mii55987_c0_g1_i1	476	24.0982	3.00633	0.390306	7.7025	1.33427e-14	2.40949e-12	2	3	2	60	53	51
Mii74323_c0_g2_i1	3758	58.2541	-2.28501	0.296723	-7.7008	1.35213e-14	2.43893e-12	63	101	80	21	20	17
Mii75100_c1_g1_i1	1180	115.451	-1.50802	0.195946	-7.69612	1.4026e-14	2.52707e-12	140	224	102	74	75	57
Mii75169_c1_g1_i1	2649	474.196	0.862518	0.112084	7.69526	1.41209e-14	2.54124e-12	286	496	165	773	719	719
Mii79932_c2_g2_i1	2878	241.609	1.0712	0.139269	7.6916	1.45309e-14	2.61203e-12	118	249	77	408	370	410
Mii49306_c0_g1_i1	364	32.716	2.64088	0.343422	7.68988	1.4727e-14	2.64424e-12	4	10	4	69	66	77
Mii50691_c0_g1_i1	522	20.31	3.21899	0.418889	7.6846	1.53479e-14	2.75258e-12	1	2	0	40	48	54
Mii48095_c0_g1_i1	953	23.5246	-3.01477	0.392361	-7.68367	1.546e-14	2.76951e-12	34	53	29	6	3	0
Mii118082_c0_g1_i1	295	21.0463	3.19657	0.416117	7.68191	1.56738e-14	2.80462e-12	2	0	1	42	53	50
Mii79469_c0_g2_i2	7103	162.772	-1.32534	0.172628	-7.67744	1.62304e-14	2.9009e-12	154	353	146	132	102	92
Mii80086_c1_g3_i1	574	45.1155	-2.3532	0.306578	-7.67569	1.64533e-14	2.93739e-12	51	102	54	22	7	14
Mii50683_c0_g1_i1	340	32.4901	2.8322	0.369046	7.67439	1.66212e-14	2.96398e-12	5	2	5	57	68	86
Mii78833_c1_g2_i1	7939	1309.74	-0.821951	0.107123	-7.67297	1.68065e-14	2.99363e-12	1187	2512	982	1321	1132	951
Mii35284_c0_g2_i1	913	25.4731	-2.86043	0.372813	-7.67257	1.68582e-14	2.99942e-12	31	66	31	7	3	3
Mii78624_c1_g1_i7	1046	102.283	-1.66146	0.21663	-7.66958	1.72567e-14	3.06684e-12	121	186	104	61	57	47
Mii14757_c0_g1_i1	270	75.703	-1.88968	0.246459	-7.66732	1.75626e-14	3.11768e-12	83	150	85	46	30	29
Mii49226_c0_g1_i1	554	29.8793	2.81945	0.367827	7.66514	1.7864e-14	3.16759e-12	5	4	3	59	79	58
Mii43342_c0_g1_i1	407	38.9377	2.5051	0.326888	7.6635	1.80937e-14	3.20469e-12	9	7	7	78	82	84
Mii68916_c0_g1_i1	3127	193.346	-2.54555	0.33232	-7.65995	1.86011e-14	3.29084e-12	252	376	241	79	39	38
Mii4040_c0_g1_i1	405	465.633	-2.84291	0.371197	-7.65876	1.87743e-14	3.31774e-12	531	1096	615	135	85	43
Mii64706_c2_g1_i2	697	20.4163	3.20673	0.418808	7.6568	1.90619e-14	3.36477e-12	0	2	1	40	46	56
Mii63916_c0_g1_i1	1350	39.6048	-2.43726	0.318631	-7.64915	2.0232e-14	3.56729e-12	52	77	48	13	12	9
Mii80262_c0_g2_i3	4890	71.9805	-1.95227	0.255306	-7.64681	2.06029e-14	3.6286e-12	96	135	74	47	26	23
Mii42765_c0_g1_i1	343	335.908	-3.0604	0.400313	-7.64501	2.08925e-14	3.67548e-12	335	752	512	69	39	24
Mii75186_c1_g1_i1	3076	217.553	-1.34302	0.175694	-7.6441	2.10418e-14	3.6976e-12	187	458	214	174	131	126
Mii50484_c0_g1_i1	847	24.0172	-3.00595	0.39353	-7.63844	2.19873e-14	3.85942e-12	28	51	35	4	2	3
Mii47439_c0_g1_i2	331	20.0948	3.18525	0.417019	7.63814	2.20378e-14	3.86395e-12	1	1	1	54	37	50
Mii67617_c0_g1_i2	3037	33.4175	-2.483	0.325184	-7.63567	2.24644e-14	3.93436e-12	42	90	34	13	9	6
Mii79211_c0_g1_i1	640	20.4589	3.20055	0.419386	7.63152	2.32011e-14	4.05884e-12	0	2	1	38	48	56
Mii77215_c1_g2_i6	2178	34.4361	-2.65604	0.348111	-7.62986	2.35013e-14	4.10678e-12	40	67	48	10	8	5
Mii75836_c9_g5_i1	258	35.2397	-2.42967	0.318618	-7.62565	2.42813e-14	4.23835e-12	45	88	37	14	10	7
Mii79561_c1_g1_i1	355	16.3198	3.35236	0.439996	7.61907	2.55514e-14	4.4551e-12	0	0	0	36	37	44
Mii72749_c6_g1_i14	515	256.602	-2.41504	0.317017	-7.61801	2.57607e-14	4.48659e-12	323	463	327	104	64	66
Mii78472_c2_g3_i1	3666	45.6042	-2.34695	0.30818	-7.61552	2.6263e-14	4.569e-12	57	106	50	26	12	6
Mii61085_c0_g1_i2	555	16.0585	3.3487	0.439836	7.61354	2.66698e-14	4.63464e-12	0	0	0	42	35	39
Mii68772_c2_g4_i1	1037	31.7893	-2.69478	0.354016	-7.61204	2.6981e-14	4.68353e-12	40	61	43	7	6	7
Mii80138_c0_g1_i2	4808	120.082	-1.79891	0.236445	-7.60816	2.78029e-14	4.82084e-12	145	201	133	68	71	38
Mii70136_c2_g2_i1	244	27.9419	-2.81102	0.369482	-7.608	2.78379e-14	4.82158e-12	30	64	39	7	4	4
Mii56054_c0_g2_i1	268	31.355	2.76465	0.363713	7.60116	2.93481e-14	5.07754e-12	3	4	6	61	62	80
Mii77919_c0_g2_i6	1336	17.2018	3.29207	0.433207	7.5993	2.97731e-14	5.14539e-12	0	1	0	41	38	44
Mii80214_c1_g1_i5	1958	59.9605	-2.10683	0.277257	-7.59884	2.98798e-14	5.15815e-12	78	111	67	17	23	29
Mii59191_c0_g2_i1	804	61.6895	-1.95831	0.257733	-7.59821	3.00263e-14	5.17774e-12	72	126	67	34	24	23
Mii94155_c0_g1_i1	750	25.9158	2.91185	0.383238	7.59803	3.00677e-14	5.17917e-12	1	5	3	51	63	59
Mii78472_c2_g3_i3	3240	42.6152	-2.50281	0.3295	-7.59578	3.05936e-14	5.26398e-12	51	74	59	15	12	7
Mii78531_c4_g1_i6	301	254.239	-1.38622	0.182533	-7.59438	3.09276e-14	5.31562e-12	227	495	263	200	163	128
Mii15219_c0_g2_i1	296	20.8686	3.11849	0.410713	7.59288	3.12876e-14	5.37159e-12	0	2	2	49	48	47
Mii121761_c0_g1_i1	465	20.1218	3.1674	0.417164	7.59271	3.13287e-14	5.37276e-12	0	1	2	59	40	42
Mii20944_c0_g2_i1	408	41.121	-2.3722	0.312444	-7.5924	3.14037e-14	5.37974e-12	58	81	46	19	10	9
Mii67250_c0_g2_i1	2913	595.519	0.766657	0.101033	7.5882	3.24369e-14	5.55068e-12	342	712	216	993	884	843
Mii75312_c1_g4_i1	1901	31.5866	-2.73547	0.360502	-7.58794	3.25044e-14	5.55616e-12	34	67	45	10	3	6
Mii66946_c0_g2_i1	309	3588.5	-2.32065	0.305911	-7.58605	3.29795e-14	5.63123e-12	3541	8205	4516	1572	1094	919
Mii45062_c0_g1_i1	1106	34.6909	-2.726	0.359363	-7.58566	3.30806e-14	5.64235e-12	48	53	49	10	6	5
Mii77886_c0_g1_i1	2678	420.382	-2.59582	0.342236	-7.58488	3.32789e-14	5.67e-12	479	944	536	151	108	59
Mii45431_c0_g1_i1	386	35.2609	-2.57217	0.339181	-7.58347	3.36424e-14	5.72571e-12	49	68	43	11	11	4
Mii80288_c0_g1_i2	6001	422.195	-0.985738	0.130085	-7.57765	3.51866e-14	5.98203e-12	409	807	337	417	312	285
Mii104232_c0_g1_i1	254	37.2671	-2.43536	0.321457	-7.57602	3.56304e-14	6.05091e-12	44	83	45	13	12	7
Mii61816_c0_g1_i1	465	363.345	-2.09171	0.276138	-7.57487	3.59478e-14	6.09821e-12	409	848	386	214	128	101
Mii72319_c4_g1_i1	278	263.513	-2.4085	0.318029	-7.57321	3.64126e-14	6.17039e-12	267	613	333	100	87	53
Mii77102_c0_g1_i2	1689	42.1069	-2.42948	0.321026	-7.56785	3.7944e-14	6.42294e-12	55	86	50	22	8	7
Mii66473_c3_g2_i10	503	33.8575	-2.48656	0.329037	-7.55708	4.12228e-14	6.97043e-12	35	96	38	13	8	7
Mii74300_c0_g1_i1	1734	85.7546	-1.95951	0.259302	-7.55686	4.12916e-14	6.97455e-12	78	165	111	44	37	31
Mii72677_c2_g1_i1	1305	59.7385	-2.13198	0.282292	-7.55242	4.27253e-14	7.20894e-12	61	119	76	29	23	16
Mii90945_c0_g1_i1	305	18.2876	3.21586	0.426005	7.54888	4.39008e-14	7.39932e-12	1	1	0	48	35	47
Mii80322_c1_g1_i4	5290	158.291	-2.48381	0.329275	-7.54327	4.58325e-14	7.71661e-12	226	334	173	72	35	28
Mii106036_c0_g1_i1	226	29.8727	2.85722	0.379316	7.53256	4.97533e-14	8.36126e-12	2	2	6	62	52	82
Mii79654_c0_g1_i1	234	83.1357	-1.76824	0.234748	-7.53253	4.97681e-14	8.36126e-12	83	181	89	57	35	34
Mii75874_c3_g2_i4	533	47.9807	-2.36141	0.313631	-7.52926	5.10292e-14	8.56395e-12	54	84	66	18	11	15
Mii59041_c0_g1_i1	775	40.5704	-2.38161	0.316399	-7.52725	5.1819e-14	8.68719e-12	55	86	45	18	14	5
Mii79777_c0_g1_i3	1684	62.1164	-1.87981	0.24992	-7.52164	5.40943e-14	9.05895e-12	83	131	57	38	27	22
Mii80286_c3_g3_i1	2549	161.333	-1.4191	0.188716	-7.51978	5.48706e-14	9.17914e-12	146	343	159	131	91	84
Mii79754_c0_g1_i2	10370	298.882	-1.057	0.140581	-7.51882	5.52741e-14	9.23678e-12	289	606	238	271	236	184
Mii72072_c1_g1_i1	955	33.8025	-2.62423	0.349031	-7.51861	5.53606e-14	9.24138e-12	43	61	46	9	6	8
Mii69837_c1_g1_i6	835	60.2129	2.08202	0.276941	7.51792	5.56529e-14	9.2803e-12	14	29	13	102	102	153
Mii75100_c1_g5_i1	1180	94.2077	-1.62677	0.216402	-7.51735	5.58957e-14	9.31087e-12	106	184	94	65	46	45
Mii82058_c0_g1_i1	297	442.391	-2.70803	0.360445	-7.51301	5.77841e-14	9.61523e-12	469	905	635	141	80	69
Mii76844_c1_g2_i3	507	28.8066	-2.5917	0.344975	-7.51271	5.79136e-14	9.62655e-12	36	80	30	10	5	6
Mii65769_c1_g1_i2	815	33.1813	-2.57469	0.342846	-7.50975	5.92421e-14	9.83695e-12	46	63	41	9	9	6
Mii80259_c2_g2_i4	1166	59.6106	-1.94166	0.258621	-7.50775	6.01505e-14	9.97722e-12	66	139	61	38	22	20
Mii105436_c0_g1_i1	284	50.1132	-2.24953	0.299727	-7.50526	6.13047e-14	1.01579e-11	50	115	62	27	15	10
Mii74018_c2_g3_i2	240	52.4845	-2.0146	0.268608	-7.50015	6.37459e-14	1.05513e-11	59	139	49	30	23	14
Mii79057_c1_g3_i1	2895	66.4568	-1.98937	0.265266	-7.49953	6.40452e-14	1.05896e-11	81	117	77	29	31	24
Mii76546_c1_g1_i2	359	54.2996	-2.31339	0.30853	-7.4981	6.47512e-14	1.06951e-11	72	112	61	35	11	8
Mii79503_c1_g1_i3	6555	264.686	-1.14865	0.153322	-7.49172	6.79753e-14	1.12158e-11	255	539	223	238	197	149
Mii74078_c1_g2_i1	1781	43.9491	-2.31021	0.308465	-7.48936	6.92103e-14	1.14075e-11	69	88	43	19	6	18
Mii28062_c0_g1_i1	499	498.163	-2.5578	0.341555	-7.48869	6.95643e-14	1.14538e-11	489	1106	686	177	113	98
Mii73674_c0_g2_i3	583	25.0992	-2.95153	0.394204	-7.48731	7.02974e-14	1.15624e-11	35	43	36	6	3	1
Mii48386_c0_g1_i1	367	27.25	2.75748	0.368351	7.48602	7.09925e-14	1.16645e-11	3	6	3	68	49	64
Mii45315_c0_g1_i1	442	20.4285	3.12068	0.417265	7.4789	7.49468e-14	1.23013e-11	0	0	3	48	50	42
Mii61558_c3_g2_i1	264	70.5005	-1.78166	0.238334	-7.47547	7.6927e-14	1.26131e-11	87	144	68	41	37	27
Mii80259_c2_g2_i1	3824	355.763	-2.33436	0.312401	-7.47232	7.87911e-14	1.29053e-11	451	779	397	183	88	80
Mii66473_c3_g2_i6	425	37.3432	-2.42934	0.325138	-7.47172	7.91503e-14	1.29506e-11	43	80	47	15	10	7
Mii39210_c0_g1_i2	1441	28.6079	-2.89219	0.387299	-7.46759	8.16756e-14	1.33498e-11	30	55	45	9	2	2
Mii52149_c0_g1_i1	630	22.9132	-2.99943	0.401757	-7.46578	8.28098e-14	1.35211e-11	26	49	34	4	4	0
Mii64393_c2_g1_i1	1023	46.8711	2.12621	0.284864	7.46396	8.39575e-14	1.36943e-11	13	23	7	115	84	87
Mii44987_c0_g1_i1	266	25.1788	-2.85474	0.382789	-7.45775	8.80153e-14	1.43412e-11	24	63	36	5	3	4
Mii78361_c1_g1_i1	281	17.8147	3.18339	0.426933	7.45642	8.89083e-14	1.44717e-11	1	1	0	50	34	43
Mii69642_c2_g1_i4	964	18.6333	3.18565	0.427461	7.45249	9.15935e-14	1.48933e-11	0	1	1	36	39	55
Mii80191_c0_g1_i3	814	54.3073	-2.07727	0.278906	-7.44792	9.48233e-14	1.53953e-11	63	108	63	23	25	16
Mii47269_c0_g1_i1	392	15.5375	3.28929	0.441643	7.44784	9.48777e-14	1.53953e-11	0	0	0	40	42	30
Mii62034_c0_g2_i1	255	22.1076	2.97953	0.40043	7.44083	1.00056e-13	1.62189e-11	4	2	0	55	45	52
Mii70798_c1_g2_i1	642	26.1727	2.76741	0.37242	7.43087	1.07884e-13	1.74696e-11	3	5	3	59	55	59
Mii70385_c0_g1_i3	1696	23.7383	-2.78016	0.37438	-7.42604	1.11895e-13	1.81004e-11	33	64	25	7	4	2
Mii80329_c6_g3_i1	2488	156.792	-1.39103	0.187352	-7.4247	1.13038e-13	1.82489e-11	170	297	146	117	109	74
Mii79552_c1_g2_i3	1211	30.5035	-2.63931	0.355477	-7.42469	1.13046e-13	1.82489e-11	37	64	40	6	4	10
Mii77102_c0_g1_i1	1719	36.2778	-2.50502	0.337494	-7.42242	1.15002e-13	1.85456e-11	56	73	39	18	7	4
Mii53397_c0_g1_i5	466	85.2515	-1.72652	0.232646	-7.42121	1.16054e-13	1.8696e-11	85	191	88	61	41	31
Mii65887_c2_g1_i2	246	54.4576	-1.98844	0.268004	-7.41944	1.17617e-13	1.89283e-11	72	109	55	23	26	20
Mii62164_c2_g1_i1	781	303.492	1.09451	0.14753	7.41886	1.18133e-13	1.89919e-11	177	233	105	537	456	500
Mii79586_c0_g1_i2	2681	105.037	-1.58941	0.21431	-7.4164	1.20343e-13	1.93274e-11	118	193	107	57	62	57
Mii70376_c0_g1_i1	657	4790.28	-2.22091	0.299465	-7.41626	1.20475e-13	1.93288e-11	4787	10420	5998	2175	1607	1382
Mii74624_c4_g2_i2	349	35.9941	2.40919	0.324869	7.41588	1.20819e-13	1.93641e-11	6	11	7	76	74	75
Mii73055_c0_g1_i3	584	25.2339	-2.72032	0.366896	-7.41443	1.22145e-13	1.95567e-11	37	64	26	6	7	2
Mii116912_c0_g1_i1	245	261.307	-2.50076	0.33739	-7.41209	1.24329e-13	1.9886e-11	250	622	346	103	52	60
Mii12090_c0_g1_i1	396	16.087	3.28023	0.442735	7.40901	1.27244e-13	2.03316e-11	0	0	0	39	25	52
Mii79211_c2_g1_i2	1049	16.7366	3.20956	0.433457	7.40455	1.31591e-13	2.10048e-11	0	0	1	39	38	41
Mii80254_c1_g1_i1	337	41.2791	-2.28873	0.309183	-7.40252	1.33619e-13	2.13067e-11	50	92	47	22	9	10
Mii61158_c0_g1_i2	315	16.7076	3.20843	0.433473	7.4017	1.34457e-13	2.14185e-11	0	0	1	41	41	36
Mii73676_c0_g1_i2	9166	1851.09	-0.787491	0.106432	-7.39902	1.37189e-13	2.18315e-11	1640	3645	1348	1988	1571	1344
Mii24528_c0_g1_i1	422	16.7552	3.2076	0.433583	7.39791	1.38347e-13	2.19936e-11	0	0	1	38	38	42
Mii29192_c0_g1_i1	236	44.8739	-2.27116	0.307136	-7.39464	1.41788e-13	2.25178e-11	55	110	47	28	11	7
Mii72319_c3_g1_i2	257	212.97	-1.406	0.190436	-7.38309	1.54655e-13	2.45364e-11	181	440	220	132	154	116
Mii78277_c1_g2_i1	332	54.3209	-2.13842	0.289749	-7.38023	1.58018e-13	2.50445e-11	66	98	66	28	19	14
Mii79458_c1_g1_i1	11986	2987.27	-2.49392	0.33796	-7.37934	1.59081e-13	2.51875e-11	3400	6321	3848	1217	681	584
Mii110169_c0_g1_i1	240	35.3798	-2.45043	0.332374	-7.3725	1.67463e-13	2.64878e-11	44	69	45	11	10	8
Mii57091_c0_g1_i1	494	20.7364	3.00459	0.407587	7.37165	1.68525e-13	2.66088e-11	0	3	2	46	46	50
Mii78938_c1_g1_i1	1910	48.948	-2.13352	0.289423	-7.37162	1.68567e-13	2.66088e-11	48	109	60	21	17	17
Mii57965_c0_g2_i1	1615	40.3799	-2.27671	0.308879	-7.37089	1.69492e-13	2.67279e-11	46	89	48	17	9	14
Mii79469_c0_g2_i3	7139	164.639	-1.2895	0.175062	-7.36595	1.75887e-13	2.77086e-11	151	369	144	133	115	88
Mii58153_c1_g1_i2	289	47.9668	2.12319	0.288296	7.36463	1.77642e-13	2.79568e-11	11	20	11	88	98	100
Mii63360_c0_g1_i2	360	71.63	3.01034	0.408995	7.36035	1.83429e-13	2.88387e-11	4	4	8	139	172	173
Mii78624_c1_g1_i4	1077	86.9393	-1.69252	0.230072	-7.35651	1.88778e-13	2.96499e-11	91	179	91	62	41	35
Mii78624_c1_g1_i6	1046	93.2255	-1.52992	0.207998	-7.35546	1.90264e-13	2.98533e-11	109	185	85	56	54	53
Mii80011_c1_g1_i7	2299	53.5665	-2.21012	0.300503	-7.35473	1.91308e-13	2.99871e-11	66	100	65	31	16	10
Mii79962_c1_g3_i1	3017	181.923	-2.52937	0.344181	-7.34894	1.99792e-13	3.12857e-11	211	397	231	74	40	30
Mii66671_c2_g1_i2	544	48.0514	-2.27407	0.3095	-7.34756	2.01851e-13	3.15766e-11	45	98	66	15	18	14
Mii62091_c0_g3_i1	942	26.4122	-2.69635	0.367058	-7.34585	2.04454e-13	3.19519e-11	38	57	31	9	4	3
Mii61800_c0_g1_i2	387	114.361	-2.72656	0.371216	-7.34495	2.05834e-13	3.21355e-11	127	306	139	42	14	15
Mii80086_c2_g2_i1	274	45.5676	-2.39132	0.325695	-7.34219	2.10127e-13	3.27731e-11	53	75	64	19	12	9
Mii64706_c2_g1_i4	571	16.0706	3.19943	0.435958	7.33885	2.1543e-13	3.35505e-11	0	1	0	39	33	43
Mii80189_c0_g1_i2	2506	435.14	0.868904	0.118399	7.33879	2.1554e-13	3.35505e-11	262	469	144	690	691	652
Mii51784_c0_g1_i1	801	3512.85	0.554211	0.0755205	7.33855	2.15916e-13	3.35758e-11	2333	4234	1456	5671	4710	4747
Mii51987_c0_g1_i2	368	15.0778	3.24894	0.442753	7.33803	2.16755e-13	3.36728e-11	0	0	0	47	27	36
Mii63122_c0_g1_i3	985	23.2038	2.99552	0.408228	7.33786	2.17044e-13	3.36843e-11	0	1	4	40	61	54
Mii61816_c0_g1_i2	301	175.722	-1.51053	0.205868	-7.33739	2.17799e-13	3.37681e-11	176	328	185	149	91	76
Mii72224_c1_g3_i1	287	54.8149	2.25484	0.307314	7.33724	2.18042e-13	3.37724e-11	12	10	16	129	115	89
Mii56893_c0_g1_i1	550	19.2301	3.04703	0.41531	7.33676	2.18828e-13	3.38607e-11	0	3	1	54	38	43
Mii75836_c9_g4_i2	517	45.9543	-2.01019	0.274135	-7.33287	2.25268e-13	3.48228e-11	62	110	40	22	18	18
Mii79214_c6_g1_i1	843	34.405	-2.40588	0.328139	-7.33189	2.2693e-13	3.50248e-11	48	84	34	11	15	4
Mii80177_c0_g1_i2	3581	143.074	-2.51892	0.343559	-7.33184	2.27022e-13	3.50248e-11	159	370	167	64	24	27
Mii36175_c0_g1_i1	307	28.7239	-2.63847	0.360079	-7.32749	2.34512e-13	3.61447e-11	37	65	35	12	3	4
Mii79755_c0_g1_i2	9027	1021.36	-2.46736	0.337047	-7.32053	2.46998e-13	3.80319e-11	1136	2258	1294	448	207	215
Mii75836_c0_g2_i1	260	38.678	-2.2072	0.30158	-7.3188	2.50207e-13	3.84881e-11	57	86	36	16	12	13
Mii119839_c0_g1_i1	250	37.7508	-2.34064	0.319854	-7.31785	2.51978e-13	3.87226e-11	40	86	47	16	9	10
Mii40867_c0_g1_i1	648	1255.75	-2.26745	0.309967	-7.31515	2.57086e-13	3.94688e-11	1356	2596	1578	528	451	306
Mii40818_c0_g1_i1	249	33.9892	-2.31313	0.316475	-7.30907	2.69002e-13	4.12579e-11	52	87	28	14	10	9
Mii79960_c1_g1_i6	3444	75.7839	-1.72416	0.235943	-7.30754	2.7207e-13	4.16787e-11	100	152	68	53	38	27
Mii65011_c0_g1_i1	1665	18.0423	3.0973	0.423856	7.30744	2.72278e-13	4.16787e-11	0	3	0	39	43	45
Mii71407_c3_g2_i3	493	22.6662	2.89296	0.39601	7.30529	2.76674e-13	4.23103e-11	2	3	2	44	54	54
Mii60179_c0_g1_i1	273	56.8626	-2.0342	0.278553	-7.30275	2.81949e-13	4.30751e-11	73	124	57	40	17	14
Mii76729_c0_g1_i1	1448	235.517	-2.53956	0.3478	-7.30179	2.83971e-13	4.33417e-11	281	505	298	84	65	33
Mii68832_c0_g2_i1	4670	212.294	-2.8071	0.385066	-7.2899	3.10181e-13	4.7296e-11	233	431	311	61	29	25
Mii48215_c1_g1_i1	942	22.7618	-2.85881	0.392183	-7.28949	3.11122e-13	4.73934e-11	28	50	31	4	5	1
Mii78771_c1_g1_i2	1637	26.1292	-2.84363	0.390721	-7.27791	3.39038e-13	5.15956e-11	26	53	41	7	1	4
Mii73311_c4_g2_i2	542	139.885	1.40783	0.193477	7.27646	3.42689e-13	5.21007e-11	75	83	40	260	230	246
Mii79298_c1_g3_i5	2901	40.7351	-2.17826	0.299368	-7.27619	3.43381e-13	5.21554e-11	62	85	38	16	16	12
Mii76885_c0_g1_i4	1261	28.8871	-2.69859	0.370958	-7.27467	3.47278e-13	5.26962e-11	24	70	43	7	4	6
Mii79874_c8_g3_i2	224	155.846	-1.341	0.184344	-7.27443	3.47876e-13	5.27359e-11	151	317	146	111	114	81
Mii78597_c0_g1_i1	1852	2236.86	-2.38964	0.328645	-7.27119	3.5634e-13	5.39668e-11	2368	4651	2945	894	652	488
Mii77230_c1_g1_i2	7154	429.731	-0.908587	0.12504	-7.26636	3.69316e-13	5.5878e-11	402	811	339	369	362	331
Mii70125_c0_g2_i2	1779	38.5936	-2.38294	0.327958	-7.26601	3.70259e-13	5.59666e-11	45	79	49	16	13	5
Mii21287_c0_g1_i1	324	77.0612	-1.80311	0.248229	-7.26387	3.76163e-13	5.68043e-11	78	198	73	58	36	21
Mii96404_c0_g1_i1	804	31.9525	-2.56719	0.353459	-7.26303	3.78506e-13	5.70561e-11	49	63	36	14	7	2
Mii77590_c0_g1_i1	3211	169.473	-2.79074	0.38424	-7.26301	3.78559e-13	5.70561e-11	219	390	211	55	24	15
Mii26167_c0_g1_i1	1454	26.603	-2.69617	0.37133	-7.26085	3.84666e-13	5.79208e-11	37	64	30	10	6	0
Mii76209_c0_g1_i2	3098	49.4593	-2.35129	0.323936	-7.25852	3.91358e-13	5.88719e-11	46	110	67	28	11	7
Mii52201_c0_g1_i1	569	1104.27	-0.719989	0.0992057	-7.25754	3.94198e-13	5.92423e-11	1050	2073	753	1231	914	870
Mii62683_c3_g1_i4	394	25.4883	-2.65257	0.36564	-7.25459	4.02872e-13	6.04879e-11	32	60	31	7	5	4
Mii79828_c0_g1_i1	558	25.9223	-2.75626	0.380044	-7.25247	4.09248e-13	6.13864e-11	34	57	33	9	5	0
Mii53397_c0_g1_i2	520	102.694	-1.72047	0.237399	-7.24718	4.25538e-13	6.37388e-11	102	198	117	76	45	39
Mii79308_c3_g4_i2	3149	147.044	-1.24231	0.171422	-7.24711	4.2575e-13	6.37388e-11	169	279	120	116	92	98
Mii54855_c0_g1_i1	1315	55.7974	-1.86641	0.257543	-7.24699	4.2615e-13	6.37388e-11	71	122	52	30	19	29
Mii75598_c1_g8_i4	6107	567.537	-0.978494	0.135066	-7.24457	4.33802e-13	6.48213e-11	535	1023	481	518	465	378
Mii63044_c1_g3_i4	872	73.2313	-1.75712	0.24259	-7.24318	4.38297e-13	6.54306e-11	82	152	75	51	34	26
Mii122462_c0_g1_i1	242	280.648	-2.47452	0.3418	-7.23967	4.49762e-13	6.70784e-11	288	613	376	114	59	60
Mii80011_c1_g1_i1	9867	590.848	-2.55764	0.353342	-7.23843	4.539e-13	6.76311e-11	617	1345	785	215	142	89
Mii67841_c2_g1_i1	246	80.0559	-1.62975	0.225303	-7.2336	4.70355e-13	7.00164e-11	92	174	73	61	39	33
Mii67781_c1_g1_i2	701	46.6273	2.13007	0.294556	7.23148	4.77751e-13	7.10499e-11	9	19	12	114	72	96
Mii80267_c0_g6_i3	1050	87.7546	-1.84129	0.254656	-7.23051	4.81172e-13	7.1429e-11	109	149	97	58	42	25
Mii79849_c0_g1_i4	3264	133.536	-1.42414	0.196963	-7.2305	4.81212e-13	7.1429e-11	156	245	122	99	90	61
Mii65248_c0_g1_i1	808	41.856	-2.1915	0.30315	-7.2291	4.86214e-13	7.21033e-11	51	99	44	22	16	7
Mii79880_c0_g2_i1	2686	51.4995	-2.16481	0.299603	-7.22558	4.98969e-13	7.39247e-11	53	101	67	26	18	12
Mii60945_c0_g1_i1	901	34.7515	-2.28101	0.315785	-7.2233	5.07407e-13	7.51039e-11	45	85	35	12	14	8
Mii45377_c0_g1_i1	487	16.8857	3.10204	0.429615	7.2205	5.17973e-13	7.65956e-11	1	1	0	38	35	46
Mii74323_c0_g2_i3	3082	38.6981	-2.35015	0.32595	-7.21016	5.5887e-13	8.25653e-11	48	91	43	23	7	6
Mii79960_c1_g1_i4	3495	82.8164	-1.67786	0.232774	-7.20809	5.6741e-13	8.3748e-11	108	159	76	63	37	33
Mii116193_c0_g1_i1	517	700.146	-2.56391	0.355848	-7.20507	5.80132e-13	8.55451e-11	690	1416	1018	235	152	133
Mii75598_c1_g8_i5	6155	551.071	-0.996364	0.138371	-7.20066	5.992e-13	8.82738e-11	548	935	473	522	409	381
Mii61800_c1_g1_i2	253	42.5253	-2.34747	0.32608	-7.19907	6.06243e-13	8.92276e-11	47	109	48	27	7	6
Mii72319_c3_g2_i9	422	198.128	-1.28475	0.17849	-7.19785	6.11683e-13	8.99438e-11	181	384	194	153	137	112
Mii74624_c4_g6_i4	302	26.4362	2.73843	0.380496	7.197	6.15499e-13	9.03625e-11	1	6	4	66	39	71
Mii34048_c0_g1_i1	239	20.6111	-2.99272	0.41583	-7.19696	6.15683e-13	9.03625e-11	21	40	34	3	1	2
Mii75323_c0_g1_i1	2065	52.828	-2.17469	0.302226	-7.19557	6.21987e-13	9.12022e-11	49	114	69	26	21	10
Mii80243_c8_g1_i2	5799	1154.03	-0.719618	0.100019	-7.1948	6.25515e-13	9.16339e-11	1048	2141	828	1197	1028	912
Mii117013_c0_g1_i1	226	33.3066	-2.4255	0.337133	-7.19449	6.26947e-13	9.17578e-11	38	76	41	15	5	8
Mii79101_c0_g2_i1	301	61.3404	-2.11037	0.293416	-7.19242	6.36549e-13	9.30763e-11	69	119	75	40	19	12
Mii75874_c4_g2_i1	4096	371.867	-2.59309	0.360614	-7.19076	6.44316e-13	9.41242e-11	446	780	484	135	83	49
Mii49154_c0_g1_i2	981	570.519	-2.82493	0.392944	-7.18913	6.52033e-13	9.51628e-11	590	1266	831	162	73	59
Mii79344_c2_g2_i1	751	25.735	-2.684	0.373472	-7.18662	6.64153e-13	9.67732e-11	26	63	35	4	4	7
Mii72319_c4_g2_i13	266	179.265	-1.29513	0.180215	-7.18659	6.64302e-13	9.67732e-11	178	380	156	163	119	84
Mii75582_c1_g1_i2	1697	40.1504	-2.27586	0.316768	-7.18465	6.73803e-13	9.80662e-11	46	79	51	17	9	13
Mii72224_c2_g2_i2	354	22.6254	2.78764	0.388076	7.18325	6.80731e-13	9.89826e-11	2	6	1	53	50	50
Mii67973_c0_g1_i1	1688	317.49	0.936868	0.130484	7.17996	6.97302e-13	1.01298e-10	179	324	109	508	527	471
Mii74431_c0_g1_i1	1800	489.976	-2.47647	0.344939	-7.17943	7.00004e-13	1.01597e-10	557	991	648	201	110	93
Mii80327_c0_g2_i5	11500	430.214	-2.29042	0.319208	-7.17532	7.21371e-13	1.04601e-10	548	982	462	224	122	86
Mii53824_c0_g1_i1	1169	25.1542	-2.65797	0.370545	-7.17314	7.32977e-13	1.06186e-10	35	73	24	11	4	1
Mii61085_c0_g3_i1	483	14.2023	3.18468	0.444089	7.17127	7.43056e-13	1.07546e-10	0	0	0	33	34	35
Mii78499_c3_g1_i2	1955	37.1261	-2.40526	0.335442	-7.17043	7.47645e-13	1.08111e-10	38	73	52	9	10	12
Mii80328_c2_g1_i1	8430	805.733	-2.10409	0.293565	-7.16739	7.64391e-13	1.1043e-10	920	1633	940	443	261	248
Mii72749_c6_g1_i10	535	272.589	-2.40602	0.335779	-7.1655	7.75053e-13	1.11867e-10	339	454	366	99	70	70
Mii66965_c0_g1_i1	395	98.2392	2.72279	0.380244	7.16062	8.03125e-13	1.15813e-10	14	10	13	193	215	236
Mii38682_c0_g1_i1	326	33.4573	-2.5611	0.357726	-7.15938	8.1043e-13	1.16759e-10	31	66	51	6	8	9
Mii61740_c0_g1_i1	1357	51.0309	-2.12958	0.297473	-7.1589	8.13293e-13	1.17063e-10	45	114	66	23	13	21
Mii36365_c0_g1_i1	280	60.9787	-1.87539	0.262028	-7.15722	8.23315e-13	1.18397e-10	95	135	45	42	26	18
Mii46801_c0_g1_i1	1051	20.142	2.94161	0.411019	7.15687	8.25382e-13	1.18586e-10	0	3	2	39	45	53
Mii61955_c0_g1_i1	1687	338.844	0.883502	0.123463	7.15601	8.30606e-13	1.19227e-10	195	356	120	627	487	484
Mii80157_c0_g1_i2	14056	437	-2.58692	0.361541	-7.15525	8.35183e-13	1.19774e-10	540	972	540	176	78	63
Mii64964_c0_g1_i1	714	430.38	3.05046	0.426386	7.15423	8.41448e-13	1.20562e-10	14	29	36	909	979	1069
Mii53794_c0_g1_i1	1694	152.25	-2.5935	0.362585	-7.15282	8.50159e-13	1.2163e-10	168	342	201	56	32	20
Mii80219_c0_g1_i4	619	28.7669	-2.60752	0.364547	-7.15277	8.50449e-13	1.2163e-10	54	49	29	9	5	5
Mii74975_c0_g1_i3	834	79.2262	-1.72913	0.24177	-7.15194	8.5563e-13	1.22259e-10	96	141	83	37	37	46
Mii90743_c0_g1_i1	257	18.0914	-2.94294	0.411517	-7.15144	8.58711e-13	1.22588e-10	20	52	23	3	1	2
Mii72319_c3_g2_i7	479	360.645	-1.196	0.167244	-7.15119	8.60294e-13	1.22702e-10	296	742	344	323	248	205
Mii65321_c0_g1_i1	738	14.2504	3.17741	0.444429	7.14942	8.71437e-13	1.24178e-10	0	0	0	31	38	33
Mii62225_c0_g1_i1	545	27.0301	-2.75666	0.385677	-7.14759	8.83132e-13	1.2573e-10	31	49	41	9	3	2
Mii43253_c0_g1_i1	694	303.165	0.963367	0.13485	7.14399	9.0661e-13	1.28956e-10	158	321	104	484	434	532
Mii74868_c0_g1_i1	353	15.3771	3.18301	0.445603	7.14315	9.12153e-13	1.29627e-10	0	0	0	24	33	52
Mii7689_c0_g1_i1	280	15.1598	3.12777	0.437895	7.14273	9.14952e-13	1.29907e-10	0	1	0	42	37	30
Mii35901_c0_g1_i1	399	21.5769	2.91538	0.408173	7.14249	9.16537e-13	1.30014e-10	2	0	3	41	55	48
Mii39350_c0_g1_i2	672	32.9554	2.52243	0.353228	7.14108	9.26015e-13	1.3124e-10	7	9	3	52	67	91
Mii58915_c0_g1_i1	410	25.876	-2.61487	0.366325	-7.13811	9.46245e-13	1.33986e-10	39	58	28	10	2	5
Mii70761_c2_g1_i4	620	19.0554	2.97903	0.417472	7.13587	9.61752e-13	1.36058e-10	1	2	1	45	32	55
Mii16911_c0_g1_i1	380	35.5911	-2.40018	0.336396	-7.13499	9.67949e-13	1.36812e-10	41	88	41	19	9	3
Mii67429_c0_g4_i1	296	45.1001	-2.04997	0.287454	-7.13147	9.92997e-13	1.40225e-10	51	114	45	28	14	13
Mii107989_c0_g1_i1	256	188.609	-2.86571	0.401878	-7.13078	9.97996e-13	1.40805e-10	218	430	260	53	19	16
Mii71374_c0_g1_i3	2947	1270.35	0.658595	0.0923971	7.12788	1.0193e-12	1.43681e-10	802	1435	518	2059	1885	1676
Mii72092_c0_g1_i13	439	217.394	1.0872	0.152535	7.12752	1.02193e-12	1.43923e-10	97	212	79	361	316	392
Mii80090_c4_g1_i5	1866	29.0341	-2.4968	0.350393	-7.12572	1.03538e-12	1.45686e-10	42	68	30	7	12	3
Mii79782_c3_g1_i2	9396	423.487	-0.949681	0.133323	-7.12313	1.055e-12	1.48313e-10	383	797	353	386	298	345
Mii68004_c2_g1_i1	234	14.2739	3.16838	0.444811	7.12298	1.05621e-12	1.4835e-10	0	0	0	29	33	40
Mii73605_c2_g1_i3	1379	30.2107	-2.46055	0.3456	-7.11964	1.08207e-12	1.51846e-10	38	67	36	12	8	4
Mii46246_c0_g1_i1	412	14.047	3.16558	0.444643	7.11937	1.08419e-12	1.52007e-10	0	0	0	33	30	38
Mii48670_c0_g1_i1	380	22.0996	-2.72642	0.383207	-7.11474	1.12122e-12	1.57059e-10	31	54	25	7	2	3
Mii80219_c1_g2_i1	1623	55.4673	-2.00644	0.282024	-7.11442	1.12387e-12	1.57289e-10	66	120	59	39	17	14
Mii106157_c0_g1_i1	474	18.011	3.00986	0.423323	7.11007	1.15984e-12	1.6218e-10	1	1	1	36	50	38
Mii77212_c0_g2_i2	796	32.1314	-2.43931	0.343298	-7.10551	1.19877e-12	1.67473e-10	36	71	41	11	4	11
Mii79713_c1_g1_i1	9587	506.983	-0.994904	0.140041	-7.10439	1.20853e-12	1.68686e-10	496	886	432	505	347	359
Mii54718_c1_g1_i1	1254	36.2285	-2.27993	0.321071	-7.10101	1.2385e-12	1.72716e-10	48	74	41	16	7	12
Mii77759_c0_g1_i1	7930	201.823	-1.02707	0.144651	-7.10035	1.24441e-12	1.73386e-10	198	448	142	166	152	156
Mii68399_c0_g1_i1	1818	32.7489	-2.43718	0.343368	-7.09786	1.26705e-12	1.76384e-10	36	85	38	14	11	2
Mii80062_c10_g2_i1	542	63.1596	-1.72603	0.243198	-7.09721	1.27304e-12	1.7706e-10	78	140	56	44	29	25
Mii77783_c0_g1_i1	1084	40.74	-2.19225	0.30893	-7.09628	1.28164e-12	1.78098e-10	47	87	48	21	9	13
Mii66556_c3_g1_i4	515	15.4982	3.09872	0.436692	7.0959	1.28509e-12	1.7842e-10	0	0	1	35	33	41
Mii76122_c0_g1_i1	4182	359.969	-2.76508	0.389735	-7.09476	1.2958e-12	1.79747e-10	453	780	472	113	53	33
Mii61161_c0_g1_i1	681	18.6895	2.99488	0.422249	7.0927	1.31518e-12	1.82274e-10	1	0	2	34	46	47
Mii79564_c0_g2_i1	350	199.373	-2.83243	0.39949	-7.09012	1.33993e-12	1.8554e-10	200	439	298	54	22	21
Mii74845_c4_g2_i1	390	15.3745	3.11275	0.439038	7.08992	1.34186e-12	1.85643e-10	0	1	0	30	34	45
Mii41450_c0_g2_i1	522	24.4482	-2.6176	0.369237	-7.08922	1.34873e-12	1.86429e-10	36	67	23	9	6	1
Mii74687_c2_g1_i1	753	40.3782	2.32741	0.328398	7.08718	1.36869e-12	1.89022e-10	6	8	12	83	85	79
Mii79496_c1_g1_i10	7648	138.093	-1.26177	0.178049	-7.08666	1.37383e-12	1.89565e-10	141	271	123	103	86	94
Mii50407_c1_g1_i1	350	162.676	-2.46986	0.348664	-7.08379	1.40267e-12	1.93373e-10	221	360	182	76	29	29
Mii76844_c1_g2_i4	281	35.0437	-2.36727	0.334208	-7.08321	1.40848e-12	1.94005e-10	36	86	43	15	12	4
Mii80266_c0_g1_i6	1396	37.4364	-2.32809	0.328722	-7.08226	1.41824e-12	1.95176e-10	45	68	49	15	10	9
Mii78361_c1_g3_i1	281	17.3232	3.01084	0.425253	7.08011	1.44036e-12	1.98047e-10	1	2	0	36	37	48
Mii58800_c0_g2_i1	857	177.525	-2.8345	0.400443	-7.07842	1.45808e-12	2.00307e-10	174	346	283	37	30	17
Mii74264_c0_g1_i1	628	31.2179	-2.55266	0.360659	-7.07777	1.46492e-12	2.01072e-10	31	69	44	13	6	3
Mii79952_c2_g2_i6	759	39.4156	-2.09279	0.295781	-7.07547	1.48941e-12	2.04254e-10	50	98	37	21	14	11
Mii19090_c0_g2_i1	287	19.7206	2.90759	0.410955	7.0752	1.49228e-12	2.04469e-10	2	2	1	38	44	52
Mii79581_c9_g5_i1	253	69.7013	-1.8865	0.266708	-7.07328	1.5131e-12	2.0714e-10	77	137	79	50	25	21
Mii75369_c1_g1_i4	915	75.7756	1.57644	0.222949	7.07088	1.53952e-12	2.10574e-10	29	56	18	156	125	137
Mii76359_c6_g5_i1	303	13.7879	3.14647	0.445034	7.07018	1.54736e-12	2.11461e-10	0	0	0	32	34	33
Mii68575_c0_g1_i2	1015	21.5719	-2.75096	0.389169	-7.06881	1.56273e-12	2.13375e-10	23	63	26	5	5	1
Mii75115_c0_g4_i1	1571	59.5904	-2.07743	0.293922	-7.06798	1.5721e-12	2.14467e-10	53	129	77	35	22	13
Mii94400_c0_g1_i1	232	199.384	-2.47438	0.350115	-7.06733	1.57939e-12	2.15275e-10	189	402	290	61	49	49
Mii77257_c2_g4_i2	949	39.9225	-2.05802	0.29121	-7.06715	1.58152e-12	2.15378e-10	56	97	34	20	14	14
Mii56991_c0_g1_i1	883	91.8003	3.15173	0.446	7.06667	1.58698e-12	2.15934e-10	1	1	5	196	198	250
Mii34376_c0_g1_i1	316	53.8274	-1.95129	0.276225	-7.06415	1.61604e-12	2.19697e-10	53	128	59	17	26	26
Mii80332_c5_g1_i2	4281	232.753	-1.31479	0.186142	-7.06336	1.62529e-12	2.20764e-10	229	402	237	196	146	124
Mii66042_c1_g2_i1	259	22.5262	2.74874	0.389205	7.06244	1.63603e-12	2.2203e-10	3	5	1	48	46	57
Mii78680_c0_g1_i9	3676	44.6179	-2.24887	0.318512	-7.06054	1.65856e-12	2.24893e-10	48	80	61	20	14	10
Mii77642_c1_g3_i1	821	257.717	-1.21189	0.171665	-7.05962	1.66961e-12	2.26195e-10	264	540	210	245	190	117
Mii52857_c0_g1_i1	316	24.2472	-2.67133	0.378418	-7.0592	1.67462e-12	2.26678e-10	31	50	32	7	4	3
Mii80254_c0_g3_i1	1446	276.704	-2.71599	0.384784	-7.0585	1.68309e-12	2.27628e-10	350	625	349	96	39	29
Mii51987_c0_g1_i3	365	16.3348	3.0399	0.43076	7.05708	1.70039e-12	2.2977e-10	0	1	1	36	43	35
Mii79777_c0_g1_i4	7469	308.072	-2.39107	0.338893	-7.05551	1.71963e-12	2.32169e-10	373	623	384	141	72	62
Mii67844_c3_g6_i1	949	249.199	1.01938	0.144529	7.05312	1.74956e-12	2.35855e-10	142	214	90	428	373	403
Mii76750_c3_g3_i1	359	25.8004	2.59419	0.367809	7.05309	1.74994e-12	2.35855e-10	4	6	3	58	59	51
Mii39052_c1_g1_i1	262	38.5285	2.26946	0.321788	7.05264	1.75551e-12	2.36403e-10	12	15	3	70	73	96
Mii46484_c0_g1_i1	1321	35.7314	-2.37222	0.336422	-7.05133	1.77217e-12	2.38441e-10	33	80	49	14	10	7
Mii51208_c0_g1_i1	311	35.5577	-2.36104	0.334843	-7.05117	1.77421e-12	2.38512e-10	34	76	49	12	10	9
Mii80322_c1_g1_i7	1612	41.9355	-2.1043	0.298548	-7.04846	1.80912e-12	2.42996e-10	59	86	42	23	11	14
Mii42932_c0_g1_i1	1484	19.9065	-2.79776	0.396963	-7.04792	1.81613e-12	2.43728e-10	29	47	23	4	4	1
Mii75555_c2_g2_i1	1453	44.496	-2.05524	0.291722	-7.04521	1.8518e-12	2.48303e-10	47	103	50	24	16	13
Mii59444_c0_g2_i3	727	26.4693	-2.52388	0.358263	-7.04476	1.85775e-12	2.48887e-10	33	63	31	6	4	9
Mii78680_c0_g1_i3	3676	48.4469	-2.08981	0.29669	-7.04376	1.87127e-12	2.50485e-10	62	82	58	20	19	16
Mii79586_c0_g1_i1	945	48.0172	-1.94436	0.276074	-7.04288	1.88305e-12	2.51846e-10	57	103	50	20	20	22
Mii58619_c0_g1_i1	407	48.0398	2.0263	0.287732	7.0423	1.89092e-12	2.52683e-10	10	20	14	115	82	88
Mii58742_c0_g1_i1	1362	107.923	-1.39531	0.198166	-7.04112	1.90697e-12	2.54611e-10	128	218	89	72	79	54
Mii65321_c0_g1_i2	699	16.4056	3.1065	0.441259	7.04007	1.92144e-12	2.56326e-10	0	1	0	22	40	53
Mii80191_c0_g2_i1	2539	204.479	-2.14074	0.304368	-7.03339	2.01576e-12	2.68679e-10	222	459	236	114	54	64
Mii75100_c1_g13_i1	1175	121.319	-1.52694	0.217139	-7.03209	2.03464e-12	2.70965e-10	132	219	125	100	57	57
Mii74845_c2_g1_i2	459	13.7218	3.1325	0.445555	7.03056	2.05699e-12	2.73533e-10	0	0	0	42	25	33
Mii76762_c0_g1_i1	1242	30.9622	-2.32303	0.33042	-7.03054	2.05742e-12	2.73533e-10	35	89	31	14	8	7
Mii107816_c0_g1_i1	390	126.116	-1.48792	0.21167	-7.02941	2.07404e-12	2.75511e-10	122	256	128	102	74	52
Mii62105_c1_g1_i1	853	32.7016	-2.39788	0.341275	-7.02623	2.12185e-12	2.81623e-10	36	68	43	7	11	9
Mii57986_c0_g1_i2	2259	479.475	0.767821	0.109317	7.0238	2.15917e-12	2.86333e-10	275	581	170	764	715	710
Mii79931_c3_g1_i1	5025	1716.76	-1.85707	0.264409	-7.02348	2.16401e-12	2.86733e-10	1948	3587	1796	1110	774	567
Mii73170_c1_g1_i1	375	20.6322	2.931	0.417335	7.02313	2.16946e-12	2.87212e-10	1	0	3	33	50	55
Mii18259_c0_g2_i1	329	202.746	-2.75849	0.392795	-7.02272	2.17596e-12	2.87829e-10	215	375	314	54	30	25
Mii67515_c3_g2_i1	253	31.6848	-2.3893	0.340341	-7.02029	2.21402e-12	2.92617e-10	40	67	38	14	8	5
Mii76738_c4_g2_i3	781	15.6474	3.07489	0.438114	7.01847	2.24317e-12	2.96219e-10	0	0	1	34	28	48
Mii52876_c0_g1_i2	2661	39.5552	-2.14271	0.305358	-7.01703	2.26626e-12	2.99017e-10	52	80	43	15	11	17
Mii79308_c3_g4_i1	3116	149.187	-1.38197	0.196967	-7.01626	2.27894e-12	3.00436e-10	167	284	135	136	86	67
Mii66946_c0_g2_i2	229	1035	-2.10846	0.300548	-7.01539	2.29308e-12	3.02047e-10	1049	2107	1298	486	379	332
Mii14652_c0_g2_i1	1208	18.3646	-2.85949	0.407676	-7.01413	2.31389e-12	3.04532e-10	19	55	23	2	3	2
Mii59862_c0_g2_i1	473	160.576	3.11964	0.444817	7.01332	2.32728e-12	3.06037e-10	1	7	9	340	335	448
Mii38418_c0_g1_i2	920	15.2972	3.08697	0.440414	7.00925	2.39603e-12	3.14729e-10	0	1	0	56	24	32
Mii80062_c10_g2_i4	519	75.3419	-1.69437	0.241736	-7.00917	2.39739e-12	3.14729e-10	83	139	82	44	35	38
Mii72449_c0_g1_i4	1563	22.7418	-2.72423	0.388724	-7.00813	2.41525e-12	3.16807e-10	25	57	30	8	1	3
Mii68410_c0_g2_i1	1585	26.9397	-2.50565	0.357553	-7.00778	2.42134e-12	3.17341e-10	42	58	28	11	5	4
Mii77596_c0_g2_i2	979	31.0735	-2.41286	0.344377	-7.00646	2.44418e-12	3.20067e-10	43	69	34	15	8	3
Mii24877_c0_g1_i1	436	17.4047	-3.08961	0.440976	-7.00631	2.44692e-12	3.20159e-10	17	26	33	1	1	0
Mii68399_c0_g1_i2	1569	30.5293	-2.41585	0.344839	-7.00575	2.45674e-12	3.20997e-10	31	76	38	9	11	5
Mii70798_c1_g2_i4	775	20.5878	2.82244	0.402877	7.00571	2.45743e-12	3.20997e-10	3	1	2	46	46	46
Mii29192_c0_g1_i2	245	29.8061	-2.40843	0.343904	-7.00321	2.50165e-12	3.26502e-10	30	81	35	12	8	5
Mii74901_c1_g1_i1	1974	17.3344	2.96393	0.423241	7.00294	2.50651e-12	3.26865e-10	0	1	2	45	34	41
Mii80230_c0_g1_i3	7364	220.41	-1.01991	0.145661	-7.00194	2.52435e-12	3.28916e-10	226	428	170	207	161	150
Mii73203_c0_g1_i1	4454	234.748	-1.03168	0.147354	-7.00138	2.53459e-12	3.29976e-10	221	472	190	215	178	155
Mii76359_c6_g2_i1	629	25.3342	2.60778	0.372596	6.99894	2.57913e-12	3.35497e-10	3	8	2	63	42	63
Mii74685_c0_g1_i5	2211	30.9684	-2.2746	0.325043	-6.99786	2.59907e-12	3.3781e-10	44	78	28	10	11	9
Mii49824_c0_g1_i1	478	29.5811	-2.4545	0.350926	-6.99436	2.66479e-12	3.46065e-10	37	61	37	10	9	4
Mii75874_c4_g1_i2	583	62.2024	-1.6994	0.242994	-6.99358	2.67959e-12	3.47699e-10	78	128	57	37	31	29
Mii79957_c4_g1_i3	732	413.052	0.825013	0.118019	6.99052	2.73877e-12	3.55084e-10	248	434	152	647	631	626
Mii63259_c0_g1_i1	599	252.135	1.08206	0.154807	6.98976	2.75349e-12	3.56698e-10	144	215	82	463	330	451
Mii8626_c0_g2_i1	927	21.7638	-2.79121	0.399344	-6.98948	2.75898e-12	3.57113e-10	17	78	26	3	1	6
Mii79780_c2_g1_i7	760	26.4165	-2.46294	0.35244	-6.98827	2.78298e-12	3.59922e-10	32	78	26	11	4	6
Mii78210_c4_g2_i2	1284	37.4769	-2.22663	0.318635	-6.98804	2.7875e-12	3.60211e-10	47	81	42	19	13	6
Mii6910_c0_g2_i1	282	13.5281	3.11523	0.445887	6.9866	2.81631e-12	3.63634e-10	0	0	0	30	31	36
Mii106809_c0_g1_i1	233	64.91	-1.96125	0.280772	-6.98521	2.84427e-12	3.66941e-10	65	128	80	36	32	15
Mii49972_c0_g2_i1	1552	18.2014	-2.90076	0.415314	-6.9845	2.85878e-12	3.6851e-10	21	42	26	4	1	1
Mii77978_c1_g1_i1	1388	55.3288	-1.8596	0.266275	-6.98377	2.87359e-12	3.70115e-10	61	124	57	31	16	30
Mii76546_c2_g1_i4	1532	32.808	-2.42409	0.347163	-6.98258	2.89811e-12	3.72966e-10	42	68	40	17	6	4
Mii28753_c0_g1_i1	877	1222.05	-2.5379	0.363472	-6.98239	2.902e-12	3.7316e-10	1244	2700	1678	444	268	196
Mii75793_c1_g1_i1	1413	44.8373	-2.02875	0.290568	-6.98199	2.91025e-12	3.73915e-10	46	103	51	20	20	14
Mii75866_c1_g2_i1	239	73.0574	-1.7311	0.247976	-6.98091	2.93269e-12	3.76489e-10	101	135	67	50	38	24
Mii64901_c0_g1_i1	3052	413.871	0.774347	0.110959	6.97867	2.97986e-12	3.82006e-10	237	481	154	704	590	601
Mii77616_c1_g3_i5	779	30.7214	-2.389	0.342331	-6.97864	2.98054e-12	3.82006e-10	33	73	38	12	9	5
Mii52164_c0_g1_i1	1756	213.478	1.04943	0.150419	6.97675	3.02095e-12	3.86869e-10	119	187	74	409	323	313
Mii79654_c4_g5_i4	225	53.8589	-2.03248	0.291364	-6.97574	3.04271e-12	3.89338e-10	58	102	67	32	17	16
Mii64997_c0_g1_i1	1357	46.1196	-2.08601	0.299062	-6.97518	3.05477e-12	3.90563e-10	56	106	48	30	16	8
Mii79654_c4_g4_i1	374	56.656	-1.88419	0.270309	-6.9705	3.1582e-12	4.03457e-10	56	125	64	32	27	18
Mii59958_c5_g9_i1	246	228.63	1.00938	0.144849	6.96849	3.2036e-12	4.08923e-10	118	217	84	368	353	380
Mii80280_c1_g3_i1	1125	35.9116	-2.27316	0.326246	-6.96762	3.22354e-12	4.11133e-10	37	81	45	10	15	9
Mii5762_c0_g1_i1	1185	32.3498	-2.37206	0.340498	-6.96643	3.25087e-12	4.14282e-10	35	73	41	15	6	7
Mii54364_c1_g1_i2	1700	20.7991	-2.70955	0.389405	-6.95818	3.44702e-12	4.38922e-10	27	54	24	6	4	1
Mii77105_c2_g1_i2	1292	25.2688	-2.56214	0.3683	-6.95667	3.48401e-12	4.43272e-10	38	51	29	9	4	4
Mii76460_c1_g1_i2	904	17.9202	2.96463	0.426202	6.95593	3.5024e-12	4.4525e-10	1	1	1	34	56	33
Mii80262_c0_g2_i4	4888	73.4436	-1.8587	0.267217	-6.95577	3.50635e-12	4.45391e-10	85	126	86	48	32	22
Mii79884_c0_g1_i5	1319	26.1329	-2.55348	0.367119	-6.95545	3.51445e-12	4.4606e-10	31	63	32	11	5	2
Mii75442_c2_g1_i1	334	159.931	-2.38733	0.343256	-6.95496	3.52674e-12	4.47256e-10	194	320	201	72	30	39
Mii63044_c1_g3_i7	623	52.0033	-1.88616	0.271412	-6.94943	3.6677e-12	4.64757e-10	62	105	55	25	26	19
Mii66716_c1_g1_i1	1481	265.908	0.949376	0.136637	6.94815	3.70114e-12	4.68616e-10	135	270	101	443	377	446
Mii6565_c0_g1_i1	264	246.39	-2.50914	0.361145	-6.94774	3.71172e-12	4.69577e-10	245	496	356	86	51	50
Mii55914_c0_g1_i1	2031	73.9458	-1.64874	0.237314	-6.94749	3.71833e-12	4.70034e-10	86	145	73	47	43	29
Mii73647_c0_g1_i4	1424	21.8674	-2.7297	0.393192	-6.94241	3.85455e-12	4.8686e-10	31	44	28	7	1	3
Mii78255_c2_g2_i1	8034	241.14	-2.38951	0.344267	-6.94088	3.89673e-12	4.91792e-10	295	542	282	107	68	37
Mii75013_c1_g2_i1	227	578.761	-2.44253	0.351979	-6.93942	3.93704e-12	4.96479e-10	608	1186	792	237	119	124
Mii63577_c0_g3_i2	1950	48.2587	1.93826	0.279324	6.93911	3.94567e-12	4.97167e-10	15	24	10	93	101	88
Mii53765_c0_g1_i1	497	15.1794	3.04372	0.438713	6.93785	3.9811e-12	5.01228e-10	0	0	1	29	34	43
Mii69706_c4_g2_i2	977	26.3399	-2.65639	0.38303	-6.93519	4.05665e-12	5.10331e-10	41	39	35	7	5	3
Mii32874_c0_g1_i1	833	30.8075	-2.40537	0.34688	-6.9343	4.08241e-12	5.13159e-10	42	72	33	17	5	4
Mii78019_c2_g1_i1	8728	1051.61	-0.875971	0.126333	-6.93385	4.09533e-12	5.14371e-10	988	2166	746	1085	942	643
Mii49446_c0_g1_i1	1291	21.7555	-2.80868	0.405099	-6.93332	4.11071e-12	5.1589e-10	28	36	33	5	2	2
Mii75836_c9_g2_i1	258	40.1175	-2.29259	0.330669	-6.93318	4.11476e-12	5.15984e-10	70	90	32	25	10	4
Mii69928_c0_g1_i1	1774	360.896	-2.5017	0.360975	-6.93041	4.19634e-12	5.25794e-10	416	757	473	148	72	59
Mii50903_c0_g1_i2	285	32.7896	-2.5042	0.361371	-6.92972	4.21679e-12	5.27934e-10	32	70	47	14	8	2
Mii35017_c0_g2_i1	722	17.2374	2.91259	0.420408	6.92801	4.26796e-12	5.33914e-10	1	3	0	39	40	41
Mii79586_c0_g1_i5	710	35.7758	-2.15974	0.311747	-6.92787	4.27209e-12	5.34004e-10	46	78	38	12	14	12
Mii63519_c0_g1_i3	1586	60.9986	-2.91455	0.420785	-6.92646	4.31501e-12	5.38682e-10	84	139	78	15	5	2
Mii78472_c2_g3_i5	2193	21.408	-2.74815	0.396764	-6.92642	4.31638e-12	5.38682e-10	22	49	31	2	4	4
Mii80274_c3_g1_i3	1345	27.5564	-2.49894	0.360819	-6.92574	4.33717e-12	5.40845e-10	31	61	36	9	8	3
Mii49212_c0_g1_i1	551	15.4341	2.99467	0.432437	6.9251	4.35652e-12	5.42803e-10	1	1	0	38	32	39
Mii50982_c1_g1_i2	302	20.1262	2.80173	0.404582	6.925	4.35979e-12	5.42803e-10	4	1	1	49	44	43
Mii79740_c0_g1_i1	259	15.5382	2.98916	0.431793	6.92267	4.43201e-12	5.51356e-10	0	1	1	39	36	34
Mii79623_c0_g1_i2	4664	103.211	-1.53937	0.222375	-6.9224	4.44064e-12	5.51992e-10	98	203	111	75	57	47
Mii78755_c0_g2_i1	2515	60.4491	-1.70928	0.247367	-6.90991	4.84968e-12	6.02359e-10	61	172	49	32	34	29
Mii38682_c0_g1_i4	328	40.4006	-2.37909	0.34435	-6.90893	4.8834e-12	6.06067e-10	30	83	63	14	11	9
Mii53444_c0_g1_i2	238	148.26	-2.48031	0.359047	-6.90802	4.91458e-12	6.09455e-10	149	326	203	58	32	26
Mii6384_c0_g2_i1	240	39.381	-2.23067	0.322965	-6.90685	4.95535e-12	6.14024e-10	48	89	44	24	11	5
Mii67304_c1_g2_i1	1426	18.9266	2.81229	0.407296	6.90477	5.02842e-12	6.22587e-10	1	4	1	49	40	41
Mii51810_c0_g1_i1	1422	31.1875	-2.35596	0.341239	-6.90412	5.05143e-12	6.24942e-10	48	58	34	11	6	10
Mii80157_c0_g1_i5	11150	263.836	-2.46343	0.356979	-6.90077	5.172e-12	6.39354e-10	302	583	334	116	49	48
Mii103032_c0_g1_i1	847	25.8372	-2.75929	0.399905	-6.89987	5.20487e-12	6.4291e-10	21	48	45	7	3	2
Mii75100_c1_g15_i1	1175	97.1093	-1.5155	0.219652	-6.89953	5.21743e-12	6.43955e-10	101	198	95	68	64	39
Mii77590_c0_g2_i1	4370	141.396	-2.4422	0.354058	-6.89774	5.2837e-12	6.51621e-10	182	321	162	67	25	25
Mii80254_c0_g4_i1	2269	271.903	-2.72955	0.39584	-6.89558	5.36457e-12	6.61074e-10	326	637	352	90	34	26
Mii91725_c0_g1_i1	320	419.071	-2.6008	0.377389	-6.89157	5.51798e-12	6.79444e-10	427	869	607	145	66	70
Mii70176_c0_g1_i1	832	32.6609	-2.49694	0.362411	-6.8898	5.58692e-12	6.87392e-10	32	66	48	15	4	5
Mii72796_c10_g1_i4	480	73.5043	-1.54827	0.224745	-6.88901	5.61819e-12	6.90698e-10	81	159	67	50	41	36
Mii85133_c0_g1_i1	312	17.3835	2.91851	0.423687	6.88835	5.64431e-12	6.93366e-10	0	4	0	34	46	41
Mii74364_c0_g2_i2	1052	61.0915	-1.81039	0.262835	-6.88795	5.66014e-12	6.94766e-10	63	121	70	34	29	24
Mii78142_c0_g1_i1	5688	247.378	-2.51456	0.365083	-6.88765	5.67227e-12	6.9571e-10	247	477	365	81	47	56
Mii71544_c4_g1_i1	1091	39.3993	2.09001	0.303483	6.88675	5.70797e-12	6.99541e-10	8	23	6	83	72	85
Mii37131_c0_g1_i1	341	15.1204	2.99013	0.434349	6.88416	5.81311e-12	7.1187e-10	0	2	0	34	35	38
Mii63599_c1_g4_i2	404	21.3966	-2.61904	0.38047	-6.88368	5.83252e-12	7.1369e-10	29	56	23	6	2	5
Mii75024_c1_g1_i1	3564	255.129	0.999482	0.145233	6.88192	5.90511e-12	7.22007e-10	123	290	81	498	406	342
Mii41862_c0_g1_i3	710	196.916	-1.17656	0.170968	-6.88177	5.91143e-12	7.22217e-10	181	382	182	174	128	123
Mii78594_c2_g1_i2	2363	123.707	-1.54239	0.224144	-6.88124	5.93332e-12	7.24327e-10	128	217	135	98	64	53
Mii44613_c0_g1_i1	231	25.8222	-2.45055	0.356389	-6.87605	6.15332e-12	7.506e-10	28	69	30	8	5	7
Mii49809_c0_g1_i1	1688	34.8807	-2.36799	0.34442	-6.8753	6.18584e-12	7.5398e-10	34	75	48	17	7	6
Mii62960_c1_g1_i1	1213	19.5668	-2.71302	0.394677	-6.87402	6.24155e-12	7.60179e-10	30	50	20	6	3	1
Mii72319_c3_g2_i5	224	177.702	-1.36041	0.197949	-6.87253	6.30718e-12	7.67576e-10	155	359	181	145	118	83
Mii67617_c0_g1_i3	2430	28.8525	-2.38476	0.347047	-6.87159	6.34892e-12	7.72057e-10	40	59	33	10	9	5
Mii75312_c1_g4_i3	1667	22.6869	-2.55628	0.372079	-6.87026	6.40832e-12	7.78676e-10	28	58	26	5	5	5
Mii62153_c1_g1_i1	2083	42.5998	-2.10896	0.307096	-6.86742	6.53754e-12	7.93761e-10	41	101	51	24	14	10
Mii70533_c1_g1_i1	444	32.6597	-2.32412	0.33852	-6.86555	6.62356e-12	8.03583e-10	53	74	29	17	10	3
Mii63577_c0_g3_i1	3071	114.137	1.36521	0.198958	6.86182	6.79894e-12	8.24223e-10	63	80	28	216	176	208
Mii70159_c4_g7_i2	863	30.6976	-2.29983	0.335192	-6.86125	6.82629e-12	8.26899e-10	42	79	29	16	4	9
Mii79345_c1_g1_i4	8688	987.992	-0.772541	0.112599	-6.86096	6.83978e-12	8.27894e-10	881	1896	726	971	922	724
Mii40579_c0_g1_i1	304	14.7704	3.01231	0.439439	6.8549	7.13631e-12	8.63119e-10	0	0	1	28	36	39
Mii75100_c1_g7_i1	1175	101.073	-1.52891	0.223049	-6.85459	7.15175e-12	8.6432e-10	110	181	105	74	57	45
Mii80219_c1_g2_i4	1632	58.9755	-1.87862	0.274083	-6.85419	7.17169e-12	8.66061e-10	72	120	61	41	26	14
Mii1076_c0_g1_i1	256	23.8853	2.6015	0.379575	6.85372	7.19536e-12	8.68251e-10	2	5	4	48	53	54
Mii78184_c1_g3_i2	1004	23.4447	-2.699	0.393856	-6.85276	7.24375e-12	8.73418e-10	25	45	36	7	3	2
Mii40044_c0_g1_i1	239	23.6402	-2.54065	0.370789	-6.85202	7.28137e-12	8.7728e-10	31	54	28	8	4	4
Mii79581_c9_g4_i1	246	48.9892	-2.01874	0.294646	-6.85141	7.31253e-12	8.80357e-10	72	90	49	32	14	14
Mii68974_c0_g1_i1	355	13.4139	3.06587	0.447577	6.84992	7.38895e-12	8.88874e-10	0	0	0	30	42	24
Mii60626_c0_g1_i1	249	43.5402	-2.02885	0.296212	-6.84932	7.42025e-12	8.91955e-10	60	81	46	21	13	18
Mii64724_c0_g1_i1	771	17.1301	2.91658	0.426011	6.84625	7.58115e-12	9.10598e-10	0	1	2	56	34	30
Mii78884_c0_g3_i1	985	32.766	-2.41975	0.353714	-6.84098	7.86534e-12	9.44009e-10	44	52	44	13	5	8
Mii38418_c0_g1_i1	848	13.1182	3.06031	0.447489	6.83885	7.9833e-12	9.57435e-10	0	0	0	44	29	23
Mii70125_c0_g1_i1	1167	333.598	-2.46167	0.36019	-6.83437	8.23684e-12	9.87086e-10	365	649	463	130	74	61
Mii80272_c6_g1_i4	6130	1302.5	-1.6066	0.235113	-6.83328	8.29961e-12	9.93848e-10	1350	2506	1371	745	746	682
Mii76738_c4_g4_i1	649	15.7894	2.97005	0.434808	6.8307	8.45003e-12	1.01109e-09	1	1	0	29	48	33
Mii75442_c3_g3_i1	824	231.73	-2.1245	0.311057	-6.82993	8.4957e-12	1.01578e-09	260	434	290	116	77	68
Mii50661_c0_g1_i1	287	26.2621	-2.39089	0.350232	-6.82658	8.69606e-12	1.03894e-09	42	64	23	10	7	5
Mii62874_c0_g1_i1	1208	192.926	1.03456	0.151599	6.82431	8.83487e-12	1.05472e-09	103	204	56	338	283	325
Mii72258_c2_g1_i1	2049	296.418	0.867727	0.127198	6.82186	8.98692e-12	1.07206e-09	168	305	112	491	438	454
Mii79755_c1_g1_i1	310	24.2675	-2.53883	0.372204	-6.82105	9.03745e-12	1.07726e-09	33	49	30	4	6	6
Mii44293_c0_g1_i1	839	1287.65	-2.65435	0.389313	-6.81804	9.22885e-12	1.09924e-09	1452	2884	1737	447	195	146
Mii79942_c2_g1_i4	7027	494.57	-0.820736	0.12042	-6.81562	9.38604e-12	1.11712e-09	478	892	372	489	424	366
Mii79316_c0_g1_i8	1366	30.57	-2.30516	0.33831	-6.81373	9.51015e-12	1.13103e-09	30	81	36	12	10	6
Mii61949_c0_g1_i1	1480	98.5474	-2.77808	0.40809	-6.80752	9.92933e-12	1.17999e-09	103	245	136	29	10	8
Mii78624_c1_g1_i5	1048	95.2178	-1.5117	0.22227	-6.80118	1.03766e-11	1.2322e-09	107	197	87	83	49	38
Mii66473_c2_g1_i2	317	21.0368	-2.63856	0.387985	-6.80067	1.04134e-11	1.23563e-09	25	53	26	7	2	3
Mii66392_c0_g1_i1	1737	74.5512	-1.59238	0.234203	-6.79913	1.05256e-11	1.24801e-09	79	149	76	48	42	34
Mii79960_c1_g1_i1	3478	90.967	-1.65385	0.243328	-6.79679	1.06974e-11	1.26742e-09	105	175	92	78	37	33
Mii78283_c3_g2_i1	1064	28.9079	-2.55504	0.375949	-6.79624	1.07385e-11	1.27132e-09	23	67	44	10	2	7
Mii75598_c1_g8_i2	6181	550.898	-0.962281	0.141594	-6.79608	1.07505e-11	1.27179e-09	505	986	475	531	441	361
Mii35743_c0_g1_i1	365	355.877	-2.48007	0.364942	-6.79578	1.07725e-11	1.27343e-09	324	776	513	124	82	67
Mii80162_c5_g2_i2	4587	305.391	-1.01988	0.150141	-6.79278	1.0999e-11	1.29922e-09	281	580	261	257	257	199
Mii66270_c3_g10_i1	519	137.935	1.16302	0.171221	6.7925	1.10204e-11	1.30077e-09	67	125	44	241	229	222
Mii79101_c0_g1_i1	501	192.948	-2.37305	0.349431	-6.79118	1.11223e-11	1.31096e-09	207	400	256	84	41	44
Mii47847_c0_g1_i1	436	13200.6	-2.90575	0.427872	-6.79116	1.11234e-11	1.31096e-09	14806	17432	23243	2009	1429	1105
Mii79628_c0_g8_i7	1545	23.8581	-2.57206	0.378745	-6.79101	1.11352e-11	1.31136e-09	26	52	33	7	3	5
Mii77212_c0_g1_i2	884	30.6334	-2.37385	0.349573	-6.7907	1.1159e-11	1.31317e-09	38	66	37	16	4	6
Mii102776_c0_g1_i1	236	48.5929	-2.17386	0.320168	-6.78974	1.12334e-11	1.32094e-09	57	79	65	28	12	11
Mii80214_c1_g2_i2	1526	57.7979	-1.92733	0.283865	-6.78958	1.12457e-11	1.3214e-09	52	116	74	32	22	21
Mii56227_c1_g1_i1	898	12.7715	3.03856	0.447765	6.78605	1.15243e-11	1.35312e-09	0	0	0	31	25	36
Mii66299_c0_g1_i2	736	66.4633	-1.99395	0.293841	-6.78582	1.15426e-11	1.35425e-09	60	118	92	39	24	19
Mii37908_c0_g1_i1	915	25.8187	-2.51809	0.3711	-6.78549	1.15691e-11	1.35635e-09	26	64	34	11	4	3
Mii56621_c0_g1_i1	742	22.1869	-2.66772	0.393272	-6.7834	1.17384e-11	1.37516e-09	31	46	28	9	1	2
Mii77361_c2_g1_i1	225	45.8234	-1.96764	0.290198	-6.78034	1.19897e-11	1.40356e-09	52	90	53	20	20	17
Mii57397_c0_g1_i1	1023	26.0498	-2.6513	0.391203	-6.77729	1.22448e-11	1.43235e-09	32	37	41	5	5	4
Mii52036_c0_g1_i1	812	27.6797	-2.33921	0.345264	-6.77513	1.24291e-11	1.45282e-09	38	61	30	9	9	6
Mii76220_c0_g1_i2	5305	133.846	-1.21069	0.178837	-6.76978	1.28977e-11	1.50647e-09	136	275	112	99	103	80
Mii102337_c0_g1_i1	446	42.4716	-2.14091	0.316274	-6.76918	1.2951e-11	1.51158e-09	47	78	55	16	19	10
Mii66142_c0_g1_i1	1895	601.853	0.748859	0.110637	6.7686	1.30033e-11	1.51655e-09	366	655	235	1095	861	785
Mii54364_c1_g1_i1	1755	22.3201	-2.60973	0.385577	-6.76839	1.3022e-11	1.5176e-09	23	52	31	5	5	3
Mii69837_c1_g1_i7	736	60.6695	1.73687	0.25662	6.76825	1.30348e-11	1.51796e-09	14	42	17	113	102	128
Mii66473_c3_g2_i7	473	37.7243	-2.24151	0.331314	-6.76552	1.32834e-11	1.54577e-09	50	94	37	26	7	5
Mii80199_c0_g1_i2	488	35.2795	-2.19509	0.324464	-6.76526	1.33067e-11	1.54732e-09	44	72	41	18	11	7
Mii3554_c0_g1_i1	237	23.6741	-2.45593	0.363099	-6.7638	1.34414e-11	1.56183e-09	32	62	24	9	5	4
Mii69110_c3_g1_i2	365	23.2569	2.68456	0.396939	6.76316	1.35014e-11	1.56764e-09	0	8	2	61	31	66
Mii73119_c3_g1_i2	1319	41.8784	-2.02409	0.299295	-6.76288	1.35271e-11	1.56947e-09	44	91	49	21	16	13
Mii65766_c0_g1_i6	352	26.4995	-2.46466	0.36464	-6.75916	1.38794e-11	1.60915e-09	45	60	24	11	8	1
Mii77510_c3_g3_i9	2187	24.0079	-2.49403	0.369094	-6.75716	1.40723e-11	1.6303e-09	27	58	30	8	5	4
Mii79983_c2_g1_i1	413	23.8343	-2.52115	0.373138	-6.75662	1.41251e-11	1.63522e-09	31	55	28	4	9	3
Mii65769_c1_g1_i1	800	21.2024	-2.58386	0.382448	-6.75609	1.41761e-11	1.63991e-09	28	50	25	6	4	3
Mii78114_c1_g2_i1	2458	64.6541	-1.67588	0.248142	-6.75369	1.44132e-11	1.66611e-09	74	123	67	37	33	31
Mii70798_c1_g2_i2	427	15.7893	2.90846	0.430736	6.75229	1.45526e-11	1.68098e-09	0	3	0	49	26	38
Mii63259_c0_g1_i2	495	238.898	0.973207	0.14417	6.75043	1.47411e-11	1.7015e-09	137	219	86	451	338	360
Mii80011_c1_g1_i9	1253	23.6544	-2.49014	0.368898	-6.7502	1.47639e-11	1.70288e-09	40	53	22	8	6	3
Mii75874_c3_g2_i2	1069	157.868	-2.44896	0.362815	-6.74988	1.47969e-11	1.70543e-09	161	298	230	54	32	38
Mii55453_c0_g1_i1	495	26.1288	-2.58808	0.383559	-6.74755	1.50363e-11	1.73175e-09	22	59	40	9	2	5
Mii79677_c2_g2_i2	2983	1103.96	0.669214	0.0991835	6.74723	1.50695e-11	1.7343e-09	691	1301	427	1583	1619	1677
Mii80219_c0_g3_i1	283	32.0896	-2.37975	0.352765	-6.74598	1.51999e-11	1.74803e-09	39	52	45	10	9	7
Mii75177_c2_g1_i4	525	14.8936	2.92587	0.433818	6.74447	1.53591e-11	1.76504e-09	0	1	1	35	37	32
Mii78984_c2_g1_i2	4379	80.4275	-1.6394	0.243085	-6.74413	1.53946e-11	1.76782e-09	89	150	85	57	44	29
Mii65616_c0_g1_i1	283	12.467	3.02116	0.448	6.74368	1.54429e-11	1.77206e-09	0	0	0	32	26	32
Mii80093_c0_g1_i1	6614	151.171	-1.21076	0.179634	-6.74015	1.58219e-11	1.81422e-09	152	333	120	141	106	76
Mii79863_c5_g2_i3	288	46.8585	-1.83131	0.271754	-6.73885	1.59648e-11	1.82928e-09	55	107	45	26	22	18
Mii74442_c1_g1_i2	2716	27.3386	-2.30081	0.341505	-6.73726	1.61397e-11	1.84796e-09	35	69	28	11	7	7
Mii76937_c1_g1_i2	611	585.577	-1.92311	0.285524	-6.73537	1.63514e-11	1.87039e-09	722	1220	598	386	226	176
Mii79949_c2_g1_i1	232	22.2846	2.66508	0.395688	6.7353	1.63594e-11	1.87039e-09	1	2	5	60	47	40
Mii80027_c1_g2_i1	2401	655.487	-2.32937	0.345852	-6.73517	1.63736e-11	1.87065e-09	708	1377	849	302	167	133
Mii80274_c3_g1_i1	2573	119.547	-2.3817	0.353632	-6.73497	1.63968e-11	1.87193e-09	124	246	163	49	29	24
Mii76466_c0_g1_i3	2566	49.5016	-1.88519	0.279949	-6.73404	1.65012e-11	1.88248e-09	52	101	57	25	21	20
Mii61115_c1_g1_i2	1013	28.6796	-2.37053	0.352028	-6.73393	1.6514e-11	1.88257e-09	43	55	32	13	6	5
Mii69826_c2_g1_i1	893	48.2425	-1.95062	0.289677	-6.7338	1.65293e-11	1.88295e-09	52	93	58	25	16	20
Mii71544_c4_g1_i2	926	41.9008	2.02435	0.300658	6.73307	1.66116e-11	1.89095e-09	15	20	5	87	69	96
Mii79778_c2_g2_i6	2123	48.6318	-1.87943	0.279153	-6.73263	1.66629e-11	1.89541e-09	58	94	53	23	21	21
Mii68549_c1_g1_i2	1662	168.744	-1.09745	0.163068	-6.73001	1.69646e-11	1.92833e-09	173	317	141	142	117	119
Mii56982_c0_g1_i2	420	19.0108	2.72239	0.40456	6.72925	1.70535e-11	1.93703e-09	1	5	1	43	44	42
Mii54619_c0_g1_i1	661	27.4448	-2.30158	0.342031	-6.72915	1.70662e-11	1.93706e-09	37	66	28	11	6	8
Mii18259_c0_g1_i1	476	401.076	-2.67628	0.39775	-6.72854	1.71377e-11	1.94378e-09	397	844	602	124	50	54
Mii80011_c1_g1_i6	2431	51.6456	-2.00352	0.297829	-6.7271	1.73083e-11	1.96171e-09	54	113	60	37	13	14
Mii77978_c0_g1_i1	3153	82.8399	-1.80926	0.269027	-6.72519	1.75362e-11	1.9861e-09	81	152	102	58	38	23
Mii79654_c4_g5_i1	266	38.6913	-2.03468	0.302566	-6.72474	1.75908e-11	1.99084e-09	56	79	37	20	11	15
Mii6910_c0_g1_i1	282	12.3768	3.0117	0.448251	6.71877	1.83267e-11	2.07264e-09	0	0	0	37	27	26
Mii76885_c0_g1_i2	4168	155.603	-2.37633	0.353793	-6.71671	1.85872e-11	2.10058e-09	181	326	197	67	42	25
Mii51613_c0_g1_i1	371	77.036	1.60368	0.238813	6.7152	1.87805e-11	2.12089e-09	34	37	23	142	137	141
Mii79976_c0_g1_i4	1109	36.3786	-2.31841	0.345361	-6.71302	1.90641e-11	2.15138e-09	40	83	45	22	8	3
Mii79863_c5_g1_i4	514	70.1088	-1.559	0.232253	-6.71251	1.9131e-11	2.15737e-09	91	161	52	56	30	36
Mii74685_c0_g1_i1	2550	33.842	-2.24167	0.334135	-6.70888	1.96119e-11	2.21002e-09	48	67	37	19	8	6
Mii66671_c2_g1_i4	793	43.644	-1.99822	0.297911	-6.70746	1.98046e-11	2.23013e-09	39	116	48	25	17	12
Mii79628_c0_g8_i5	1637	27.2992	-2.35685	0.351531	-6.70454	2.02043e-11	2.2735e-09	34	61	32	10	4	9
Mii68239_c0_g1_i1	269	15.3989	2.88743	0.430828	6.70205	2.05522e-11	2.31099e-09	0	3	0	47	28	35
Mii60920_c0_g1_i1	1473	24.4507	-2.49477	0.372321	-6.70059	2.07575e-11	2.3324e-09	25	57	33	8	5	4
Mii44987_c0_g2_i1	250	21.627	-2.66426	0.397743	-6.69844	2.10658e-11	2.36535e-09	20	48	33	4	2	5
Mii79211_c1_g1_i1	1045	12.5385	3.00498	0.448655	6.69776	2.1164e-11	2.37467e-09	0	0	0	28	25	37
Mii62111_c2_g4_i1	378	27.6624	2.52018	0.376339	6.69658	2.13361e-11	2.39227e-09	5	3	5	48	50	78
Mii26695_c0_g1_i1	1142	18.1817	-2.72553	0.407469	-6.68891	2.24832e-11	2.51908e-09	18	48	25	3	2	3
Mii69026_c0_g1_i1	2230	89.2259	1.54227	0.230627	6.68728	2.27351e-11	2.54549e-09	37	50	28	206	159	122
Mii78987_c6_g3_i1	1197	43.3936	-2.10269	0.314537	-6.68502	2.30889e-11	2.58326e-09	72	82	39	27	15	7
Mii63672_c0_g1_i2	1392	30.7226	-2.28058	0.34118	-6.68438	2.31897e-11	2.59268e-09	29	90	34	16	7	6
Mii30592_c0_g1_i1	236	24.4718	-2.53701	0.379792	-6.67999	2.38957e-11	2.66972e-09	37	44	30	10	3	3
Mii51384_c0_g1_i1	314	877.851	-2.41402	0.361408	-6.6795	2.39751e-11	2.67668e-09	936	1784	1199	370	185	170
Mii76799_c1_g2_i4	853	229.126	0.938672	0.140557	6.67826	2.41803e-11	2.69766e-09	125	230	83	379	363	346
Mii77485_c4_g1_i3	550	21.7866	-2.50432	0.37504	-6.67747	2.43094e-11	2.70962e-09	28	56	24	7	5	3
Mii72342_c1_g1_i2	448	42.4923	-2.07387	0.310582	-6.67737	2.43263e-11	2.70962e-09	48	82	52	20	19	9
Mii78049_c2_g7_i2	337	41.7023	-2.03768	0.305165	-6.67729	2.43394e-11	2.70962e-09	55	93	41	28	14	8
Mii52090_c0_g1_i1	278	18.1735	2.75789	0.413163	6.67507	2.47122e-11	2.74917e-09	2	1	2	40	45	37
Mii78624_c1_g1_i2	1065	95.8698	-1.34978	0.202225	-6.67467	2.47787e-11	2.75462e-09	106	193	83	76	52	59
Mii79304_c2_g1_i4	7387	171.701	-1.05903	0.158716	-6.67246	2.51543e-11	2.79439e-09	169	347	136	140	136	117
Mii70107_c3_g1_i1	679	60.6185	-1.60552	0.240649	-6.67161	2.53011e-11	2.80871e-09	72	136	52	42	28	31
Mii47631_c0_g1_i1	230	22.2817	-2.59651	0.389314	-6.66944	2.56784e-11	2.84857e-09	21	53	32	7	3	3
Mii79729_c3_g1_i2	1882	49.7854	-1.94357	0.291543	-6.66648	2.62003e-11	2.90441e-09	65	91	54	33	14	17
Mii51937_c0_g1_i1	474	28.6512	-2.26743	0.340159	-6.66582	2.63199e-11	2.91561e-09	38	67	30	14	7	6
Mii76814_c1_g1_i3	4395	407.957	-2.49456	0.374455	-6.66184	2.70428e-11	2.99357e-09	468	919	521	172	61	71
Mii62111_c2_g2_i2	378	19.268	2.72602	0.409212	6.66163	2.70807e-11	2.99566e-09	2	2	2	34	49	45
Mii78302_c1_g5_i1	1377	16.4944	2.83937	0.426277	6.66086	2.72239e-11	3.00937e-09	1	0	2	34	35	43
Mii79581_c9_g7_i2	268	51.1222	-1.94508	0.292081	-6.65938	2.74983e-11	3.03757e-09	61	94	59	29	24	12
Mii48005_c0_g1_i1	291	187.677	1.07278	0.161114	6.6585	2.76632e-11	3.05362e-09	107	156	64	336	268	317
Mii79218_c4_g1_i3	1151	46.3607	-1.80993	0.271841	-6.65806	2.77467e-11	3.06069e-09	55	105	44	24	23	19
Mii76063_c1_g1_i3	2513	75.3076	-1.75299	0.263319	-6.65728	2.78935e-11	3.07472e-09	79	145	85	49	43	20
Mii76729_c0_g2_i3	3099	97.2841	-2.66811	0.400817	-6.65667	2.80097e-11	3.08535e-09	111	208	136	32	10	12
Mii53517_c0_g2_i2	1097	19.9515	-2.62406	0.394276	-6.65539	2.82559e-11	3.11029e-09	22	50	26	6	2	3
Mii68762_c3_g2_i1	304	38.8097	-1.98042	0.297655	-6.65339	2.8641e-11	3.15047e-09	46	88	40	19	17	12
Mii79429_c0_g3_i10	2568	24.8597	-2.41754	0.363397	-6.65261	2.87936e-11	3.16431e-09	31	55	30	7	8	4
Mii79931_c2_g1_i1	567	120.938	-1.19905	0.180239	-6.65254	2.88072e-11	3.16431e-09	125	261	95	107	77	75
Mii80275_c5_g2_i1	321	278.459	-0.991394	0.149038	-6.65193	2.8927e-11	3.17525e-09	275	485	237	248	210	201
Mii63307_c0_g1_i1	1041	109.424	1.36169	0.204764	6.65001	2.93068e-11	3.21468e-09	46	85	34	224	141	212
Mii63122_c0_g1_i1	984	13.0816	2.94384	0.442736	6.6492	2.94699e-11	3.23031e-09	0	1	0	36	28	30
Mii73003_c1_g5_i3	352	13.1958	2.94381	0.442932	6.64619	3.00772e-11	3.29457e-09	0	1	0	30	29	35
Mii70761_c2_g1_i2	519	21.1726	2.58831	0.389498	6.64525	3.02694e-11	3.31313e-09	3	6	1	48	40	53
Mii65058_c6_g2_i5	507	12.5943	2.98614	0.44937	6.64516	3.02888e-11	3.31313e-09	0	0	0	25	25	40
Mii73367_c1_g2_i1	2055	40.5612	-2.10868	0.317437	-6.64284	3.0769e-11	3.36331e-09	46	73	52	18	16	10
Mii68004_c1_g2_i4	273	19.8069	2.67815	0.403172	6.64269	3.08007e-11	3.36443e-09	1	3	3	39	42	50
Mii76896_c2_g7_i1	300	22.76	-2.63087	0.39608	-6.64228	3.08869e-11	3.37149e-09	23	42	36	4	5	3
Mii75013_c0_g1_i1	257	200.141	-2.3586	0.355177	-6.64065	3.12313e-11	3.40671e-09	233	387	263	85	54	35
Mii58541_c0_g1_i2	900	23.2439	-2.48722	0.374587	-6.63989	3.13911e-11	3.42176e-09	31	47	29	7	5	4
Mii47934_c0_g1_i1	521	24.2494	2.46466	0.371223	6.63929	3.15205e-11	3.43348e-09	4	5	4	58	45	53
Mii80280_c2_g2_i1	1269	46.7223	-2.03101	0.305951	-6.63835	3.17209e-11	3.45291e-09	59	79	56	26	18	11
Mii62111_c2_g3_i1	387	17.968	2.8182	0.424593	6.63741	3.19236e-11	3.47256e-09	0	2	2	26	45	50
Mii74624_c4_g6_i1	344	61.0727	1.73154	0.260892	6.63702	3.20079e-11	3.47932e-09	20	39	14	94	125	124
Mii59669_c0_g1_i1	943	23.934	-2.4857	0.37461	-6.63543	3.23563e-11	3.51475e-09	34	56	26	11	5	1
Mii63044_c1_g3_i3	469	80.8987	-1.54684	0.233155	-6.63436	3.25921e-11	3.53791e-09	91	168	75	54	56	29
Mii80219_c0_g1_i1	374	31.2996	-2.24958	0.339091	-6.63416	3.26352e-11	3.54014e-09	35	73	37	17	6	7
Mii79481_c0_g3_i1	3168	38.784	-2.04753	0.308902	-6.62842	3.39306e-11	3.67812e-09	45	79	45	21	12	12
Mii61816_c0_g1_i4	1143	699.43	-2.03728	0.307424	-6.62693	3.42742e-11	3.7128e-09	854	1403	776	416	243	190
Mii67663_c1_g1_i1	384	58.113	-1.74794	0.263787	-6.62634	3.4411e-11	3.72504e-09	72	104	61	35	27	24
Mii74134_c0_g2_i1	1035	24.0188	-2.52195	0.3807	-6.62452	3.48384e-11	3.76871e-09	33	51	29	11	4	1
Mii12421_c0_g1_i1	447	12.0023	2.97463	0.449059	6.62415	3.4926e-11	3.77557e-09	0	0	0	34	28	25
Mii75874_c3_g2_i3	495	20.6874	-2.54187	0.383741	-6.62392	3.49802e-11	3.77882e-09	26	49	25	5	4	4
Mii77352_c3_g1_i1	4805	623.886	-0.857309	0.129442	-6.62311	3.5171e-11	3.79682e-09	617	1103	479	685	474	438
Mii79559_c8_g2_i3	243	87.3012	-1.45253	0.219328	-6.62262	3.5289e-11	3.80694e-09	104	173	76	68	55	37
Mii79581_c9_g3_i5	252	62.5179	-1.72172	0.260014	-6.62162	3.55273e-11	3.83001e-09	82	135	54	52	21	24
Mii77473_c5_g7_i1	246	33.3275	-2.11851	0.320011	-6.62012	3.58911e-11	3.86657e-09	38	77	37	13	14	9
Mii70263_c1_g1_i2	1727	30.2756	-2.38487	0.360255	-6.61995	3.59324e-11	3.86836e-09	30	56	45	11	6	7
Mii74575_c1_g1_i2	1837	88.1591	-1.45028	0.21909	-6.61954	3.60326e-11	3.8746e-09	109	163	78	65	55	41
Mii73357_c2_g2_i3	516	15.2965	2.87332	0.434068	6.61951	3.60398e-11	3.8746e-09	0	0	2	32	31	42
Mii76750_c3_g1_i2	867	15.2981	2.86067	0.432211	6.61871	3.62358e-11	3.893e-09	0	3	0	30	34	43
Mii45638_c0_g1_i1	877	16.3307	-2.77699	0.419578	-6.61853	3.62786e-11	3.89493e-09	27	37	18	5	1	0
Mii76729_c0_g1_i2	2317	307.298	-2.53235	0.382646	-6.618	3.64086e-11	3.90622e-09	340	664	416	120	45	49
Mii49946_c0_g1_i1	1228	17.8536	-2.65807	0.401701	-6.61704	3.66454e-11	3.92892e-09	24	47	20	4	1	4
Mii80284_c1_g1_i3	2650	277.203	-1.93237	0.292102	-6.61538	3.70602e-11	3.97068e-09	309	578	307	179	97	91
Mii80219_c1_g3_i3	265	32.0847	-2.28761	0.345863	-6.6142	3.73572e-11	3.99977e-09	38	63	41	15	10	4
Mii74523_c2_g1_i1	442	23.8987	-2.5263	0.381989	-6.61354	3.75229e-11	4.01477e-09	23	70	29	11	4	1
Mii77752_c0_g1_i2	1688	31.9036	-2.3893	0.361341	-6.61233	3.78316e-11	4.04504e-09	32	72	43	18	4	4
Mii67369_c0_g1_i1	2471	863.087	0.663131	0.100293	6.61195	3.79282e-11	4.0526e-09	556	1069	306	1302	1267	1255
Mii25297_c0_g1_i1	328	95.7756	-2.66291	0.402762	-6.61162	3.80144e-11	4.05904e-09	84	219	146	26	16	10
Mii75024_c1_g1_i2	3539	246.908	0.931966	0.140966	6.61128	3.81004e-11	4.06547e-09	150	248	79	458	370	352
Mii61816_c0_g1_i6	683	333.796	-2.29076	0.346535	-6.61047	3.83109e-11	4.08514e-09	405	753	383	164	96	55
Mii76864_c2_g3_i1	1657	40.2776	-2.05135	0.310326	-6.61031	3.83518e-11	4.08672e-09	50	84	44	25	14	8
Mii2190_c0_g2_i1	621	13.7497	2.92028	0.441802	6.60994	3.84478e-11	4.09417e-09	0	0	1	29	39	28
Mii80272_c6_g1_i3	408	67.5646	-1.62292	0.245551	-6.6093	3.86142e-11	4.1091e-09	76	130	69	48	31	31
Mii74656_c2_g1_i1	885	34.992	-2.18834	0.331138	-6.60854	3.88131e-11	4.12746e-09	37	87	40	21	10	5
Mii56781_c0_g1_i1	1085	20.5187	-2.62616	0.397577	-6.60541	3.96426e-11	4.21281e-09	22	52	27	5	6	0
Mii72319_c3_g2_i11	230	141.887	-1.29724	0.196545	-6.60022	4.10557e-11	4.36003e-09	123	305	135	127	84	76
Mii80322_c1_g2_i1	7240	574.756	-2.25191	0.341199	-6.59999	4.1119e-11	4.36379e-09	643	1316	679	305	138	125
Mii48724_c0_g1_i2	407	32.2352	-2.17183	0.329077	-6.59975	4.11849e-11	4.36783e-09	49	64	32	13	13	7
Mii79294_c1_g3_i1	443	49.0441	-1.87141	0.283583	-6.59916	4.135e-11	4.38237e-09	76	109	37	36	17	15
Mii76738_c4_g2_i1	671	13.3408	2.91251	0.441433	6.59785	4.17165e-11	4.41823e-09	0	0	1	34	29	31
Mii102033_c0_g1_i1	298	12.2489	2.96648	0.449713	6.59639	4.21289e-11	4.4589e-09	0	0	0	43	21	26
Mii72677_c1_g1_i1	252	375.65	-2.098	0.3181	-6.59542	4.24066e-11	4.48526e-09	359	788	482	183	126	117
Mii78601_c0_g2_i1	673	26.7766	-2.46025	0.373109	-6.5939	4.28415e-11	4.5282e-09	39	42	35	9	7	3
Mii34341_c0_g1_i1	768	16.4778	-2.76455	0.419564	-6.58909	4.42541e-11	4.67324e-09	23	34	22	4	1	1
Mii59893_c0_g1_i1	1008	21.017	-2.54077	0.385607	-6.58902	4.42733e-11	4.67324e-09	29	43	26	5	4	4
Mii70345_c0_g1_i1	966	35.8701	-2.20293	0.334378	-6.58815	4.45327e-11	4.69745e-09	53	90	31	24	3	10
Mii77217_c3_g1_i2	354	56.742	-1.74723	0.265367	-6.58422	4.57274e-11	4.82022e-09	71	102	59	35	25	24
Mii73170_c3_g1_i1	721	20.8384	2.57888	0.391719	6.5835	4.595e-11	4.84044e-09	4	3	2	55	43	40
Mii75013_c1_g1_i1	272	224.413	-2.32605	0.35337	-6.58247	4.6271e-11	4.87098e-09	250	470	288	104	56	42
Mii46574_c1_g1_i1	979	27.1222	-2.39376	0.3638	-6.57988	4.70818e-11	4.95301e-09	27	63	36	6	11	4
Mii72504_c2_g2_i5	1071	16.2983	-2.80117	0.425752	-6.57936	4.72477e-11	4.96712e-09	18	37	24	1	4	0
Mii72224_c1_g1_i1	229	33.8057	2.13346	0.324308	6.57851	4.75174e-11	4.99213e-09	7	14	7	82	70	55
Mii66672_c1_g1_i2	464	179.753	-2.51348	0.382114	-6.57783	4.77371e-11	5.01185e-09	189	352	261	65	31	30
Mii62360_c0_g1_i3	1150	19.9613	-2.5683	0.390511	-6.57678	4.80733e-11	5.04377e-09	23	53	24	7	3	2
Mii76288_c4_g2_i1	923	33.6609	-2.29262	0.348678	-6.57516	4.85998e-11	5.0956e-09	36	68	45	14	13	3
Mii76220_c0_g1_i4	5333	130.946	-1.20408	0.183159	-6.57399	4.89857e-11	5.13263e-09	131	254	116	92	94	89
Mii69712_c0_g1_i3	3870	28.7634	-2.33801	0.355652	-6.57386	4.90279e-11	5.13362e-09	35	53	38	10	5	9
Mii78142_c0_g1_i2	4590	285.147	-2.4824	0.377835	-6.57008	5.02886e-11	5.2621e-09	293	523	426	97	61	50
Mii79849_c0_g1_i7	3119	105.629	-1.25917	0.191703	-6.56832	5.08853e-11	5.32099e-09	120	205	87	78	68	70
Mii78601_c0_g4_i7	1013	31.6237	-2.207	0.336108	-6.56634	5.15656e-11	5.38853e-09	43	61	36	14	11	6
Mii63044_c1_g5_i1	304	46.5537	-1.82561	0.278054	-6.56567	5.18002e-11	5.40944e-09	60	107	41	30	23	13
Mii65608_c0_g1_i1	1553	35.1668	-2.09247	0.318705	-6.56553	5.18497e-11	5.41101e-09	55	66	34	17	11	11
Mii18009_c0_g1_i1	227	11.7797	2.95006	0.449604	6.56147	5.32812e-11	5.5567e-09	0	0	0	30	25	30
Mii77230_c0_g1_i1	649	15.4666	-2.74774	0.418801	-6.56098	5.34542e-11	5.57104e-09	28	42	13	4	1	1
Mii74624_c4_g6_i2	292	20.6194	2.57299	0.392267	6.55928	5.40689e-11	5.63135e-09	2	4	3	44	45	46
Mii3066_c0_g1_i1	330	326.784	-2.41398	0.368056	-6.55873	5.42697e-11	5.64851e-09	309	658	477	119	79	63
Mii66473_c2_g1_i1	333	25.7932	-2.34076	0.357216	-6.55279	5.6472e-11	5.87384e-09	36	60	27	13	4	5
Mii77352_c1_g1_i1	276	36.6361	-2.13776	0.326335	-6.55082	5.72207e-11	5.94776e-09	52	71	39	20	14	5
Mii70505_c0_g1_i1	2701	466.452	0.720855	0.110083	6.54832	5.81898e-11	6.04449e-09	267	527	194	766	687	644
Mii72453_c1_g1_i1	1284	25.3521	-2.34479	0.358119	-6.54752	5.84998e-11	6.07266e-09	36	56	27	7	10	4
Mii71703_c0_g1_i1	432	28.9061	-2.38003	0.363729	-6.5434	6.01337e-11	6.23815e-09	28	61	41	12	3	8
Mii2180_c1_g1_i1	383	384.371	0.867204	0.132544	6.54278	6.03865e-11	6.26022e-09	218	366	156	591	551	643
Mii78184_c1_g3_i1	1189	28.6455	-2.31208	0.353494	-6.54065	6.12539e-11	6.34593e-09	25	74	37	12	8	5
Mii51588_c0_g1_i1	1514	1651.77	0.558149	0.0853368	6.54055	6.12942e-11	6.34593e-09	1061	1992	705	2435	2322	2331
Mii57292_c0_g1_i1	1944	134.677	-2.62186	0.400885	-6.54018	6.14468e-11	6.35754e-09	120	266	216	36	22	19
Mii79858_c17_g4_i4	863	278.809	0.913421	0.139676	6.53959	6.16873e-11	6.37821e-09	135	318	101	421	443	452
Mii72786_c3_g1_i2	2483	409.14	-0.939369	0.143649	-6.53933	6.17937e-11	6.385e-09	396	696	347	332	309	350
Mii80283_c3_g1_i3	1090	26.6462	-2.36362	0.361451	-6.53923	6.18345e-11	6.385e-09	34	60	31	14	3	5
Mii78415_c0_g1_i5	3337	37.3311	-2.16484	0.331341	-6.53356	6.42247e-11	6.62744e-09	53	58	45	17	13	8
Mii79605_c0_g1_i2	4021	63.6638	-1.72406	0.263888	-6.53331	6.43298e-11	6.63392e-09	68	124	70	41	35	20
Mii79698_c2_g2_i1	3069	110.085	-1.34302	0.205599	-6.53225	6.47906e-11	6.67705e-09	119	204	103	93	65	57
Mii25976_c0_g1_i1	331	13.1924	2.9048	0.444727	6.53165	6.50502e-11	6.6994e-09	0	1	0	23	33	37
Mii47725_c0_g1_i1	264	51.2506	-1.96588	0.300984	-6.5315	6.51122e-11	6.69951e-09	49	106	64	32	21	11
Mii34678_c0_g2_i1	415	25.5702	2.35944	0.361243	6.53145	6.51368e-11	6.69951e-09	3	8	5	58	54	50
Mii70761_c3_g2_i1	1341	30.1537	2.23376	0.342118	6.5292	6.61236e-11	6.79655e-09	9	9	4	79	59	51
Mii7682_c0_g1_i1	478	1794.28	0.544832	0.0834679	6.52744	6.69045e-11	6.87231e-09	1198	2200	735	2889	2497	2321
Mii76272_c0_g1_i1	2774	60.024	-1.65401	0.253512	-6.5244	6.82755e-11	7.00855e-09	64	123	62	37	33	25
Mii122625_c0_g1_i1	246	33.3809	-2.14512	0.328814	-6.5238	6.855e-11	7.03212e-09	37	81	37	14	16	5
Mii79674_c1_g1_i2	2061	133.421	-2.39402	0.367238	-6.51898	7.07847e-11	7.25662e-09	159	289	166	58	33	18
Mii94792_c0_g1_i1	407	32.2968	-2.25713	0.346477	-6.51451	7.29286e-11	7.47151e-09	33	68	43	17	7	6
Mii66102_c0_g1_i2	3724	469.53	-2.39269	0.367294	-6.51437	7.29962e-11	7.47355e-09	542	788	669	133	149	95
Mii72630_c1_g3_i3	7602	1284.65	-0.719935	0.110546	-6.51254	7.389e-11	7.56012e-09	1052	2445	978	1320	1089	1080
Mii75100_c1_g12_i1	1190	94.9964	-1.44047	0.221194	-6.51227	7.40256e-11	7.56906e-09	95	187	95	78	44	53
Mii73003_c1_g1_i1	359	13.0281	2.88029	0.442305	6.512	7.41561e-11	7.57458e-09	0	0	1	35	27	30
Mii79695_c0_g1_i4	585	30.7858	-2.36296	0.362865	-6.51196	7.41763e-11	7.57458e-09	32	62	43	14	9	2
Mii79294_c1_g5_i1	230	36.7314	-2.03923	0.313492	-6.50487	7.77617e-11	7.93554e-09	57	72	34	21	10	12
Mii79885_c1_g1_i1	10890	1022.53	-0.72621	0.11168	-6.50262	7.89308e-11	8.0496e-09	967	2019	671	1125	939	718
Mii76896_c2_g8_i1	4393	742.175	-0.621567	0.0956035	-6.50151	7.95175e-11	8.10417e-09	692	1434	462	721	687	693
Mii22068_c0_g2_i1	379	19.9505	2.59772	0.399582	6.50109	7.97417e-11	8.12173e-09	3	3	2	46	52	34
Mii49896_c0_g1_i2	230	40.4053	-1.95301	0.300559	-6.49792	8.14392e-11	8.28924e-09	56	80	40	25	12	14
Mii79235_c4_g1_i5	471	47.8317	-1.95258	0.300564	-6.4964	8.22665e-11	8.36801e-09	73	79	48	25	11	24
Mii75027_c1_g2_i2	2177	142.28	-2.32768	0.358325	-6.496	8.24862e-11	8.38492e-09	184	267	177	67	28	31
Mii78255_c2_g2_i4	1866	27.4429	-2.32379	0.357902	-6.4928	8.42573e-11	8.55941e-09	30	55	37	10	7	6
Mii79628_c0_g8_i9	1841	29.05	-2.21729	0.341685	-6.4893	8.62389e-11	8.75504e-09	39	61	32	13	10	5
Mii79410_c1_g1_i1	14290	2550.46	-1.33873	0.206503	-6.48287	8.99968e-11	9.13062e-09	2389	5275	2410	2080	1528	1451
Mii55453_c1_g1_i2	548	182.83	-2.61982	0.404211	-6.48131	9.09281e-11	9.21914e-09	228	377	246	63	18	24
Mii55790_c0_g1_i3	1609	20.1069	-2.50616	0.386718	-6.4806	9.13579e-11	9.25673e-09	27	48	23	7	4	2
Mii75874_c3_g2_i5	1066	124.618	-2.25255	0.347904	-6.47464	9.50404e-11	9.62364e-09	134	267	158	57	39	23
Mii70098_c1_g1_i4	781	16.8385	-2.77922	0.429275	-6.47422	9.53028e-11	9.64398e-09	17	29	29	2	2	1
Mii62677_c0_g2_i1	544	13.627	-2.78336	0.429961	-6.47352	9.57443e-11	9.68241e-09	19	39	15	2	2	0
Mii64348_c1_g1_i2	320	31.5972	2.24323	0.346691	6.4704	9.77433e-11	9.87818e-09	4	10	8	53	75	65
Mii60439_c0_g1_i1	1759	36.7383	-2.13573	0.330145	-6.46908	9.86005e-11	9.9584e-09	46	60	47	15	14	9
Mii79581_c9_g2_i2	225	105.077	-1.46379	0.226315	-6.46792	9.93642e-11	1.00291e-08	114	190	106	90	57	44
Mii56763_c1_g2_i1	462	20.1249	2.54895	0.394178	6.46648	1.0031e-10	1.0118e-08	3	4	2	41	43	48
Mii74685_c0_g1_i6	2729	35.6102	-2.14939	0.332437	-6.46556	1.00923e-10	1.01636e-08	47	65	42	20	11	6
Mii80276_c0_g1_i2	3196	47.7333	-1.9943	0.308452	-6.4655	1.00961e-10	1.01636e-08	43	90	65	23	14	20
Mii73551_c1_g1_i2	582	12.6861	2.86628	0.443321	6.46548	1.00979e-10	1.01636e-08	1	0	0	32	28	30
Mii72319_c3_g2_i3	358	145.816	-1.25006	0.193348	-6.46532	1.01083e-10	1.01636e-08	127	284	145	112	98	89
Mii60239_c2_g1_i1	283	27.9146	-2.23322	0.345416	-6.46532	1.01086e-10	1.01636e-08	33	64	32	7	12	7
Mii73551_c1_g1_i3	575	15.4122	2.77194	0.428753	6.46511	1.01225e-10	1.0171e-08	2	0	1	32	36	37
Mii80216_c1_g2_i3	376	15.6104	-2.80439	0.433812	-6.46454	1.01609e-10	1.02031e-08	18	26	26	2	1	1
Mii58958_c0_g1_i1	1941	30.5924	-2.16165	0.334408	-6.46412	1.0189e-10	1.02247e-08	33	68	37	12	11	8
Mii71407_c2_g2_i1	883	16.0309	2.71535	0.420168	6.46254	1.0296e-10	1.03255e-08	1	4	0	39	35	37
Mii73551_c0_g2_i13	436	14.829	2.77486	0.429394	6.46226	1.03153e-10	1.03382e-08	1	1	1	34	34	34
Mii80332_c3_g1_i4	753	20.8543	-2.46942	0.382511	-6.45582	1.07634e-10	1.07805e-08	28	48	24	4	7	3
Mii76359_c6_g2_i4	359	11.6375	2.90985	0.45074	6.45572	1.07708e-10	1.0781e-08	0	0	0	23	31	29
Mii76266_c3_g3_i6	1856	33.7927	-2.02608	0.313942	-6.45369	1.09161e-10	1.09194e-08	49	79	29	17	15	8
Mii67817_c0_g3_i1	2868	43.4848	-1.92537	0.298463	-6.45096	1.11144e-10	1.11107e-08	50	81	51	20	14	21
Mii73605_c3_g2_i1	1393	21.6404	-2.5713	0.398728	-6.44874	1.12781e-10	1.12672e-08	23	41	33	6	5	1
Mii79558_c1_g2_i1	526	34.7938	-2.12115	0.328973	-6.4478	1.13486e-10	1.13304e-08	40	71	42	18	13	6
Mii80211_c0_g1_i1	7187	130.431	-1.22183	0.189572	-6.44519	1.15454e-10	1.15195e-08	135	236	120	108	83	81
Mii42999_c0_g2_i1	461	22.8057	2.41926	0.375384	6.44477	1.15776e-10	1.15444e-08	2	10	2	52	46	51
Mii77217_c3_g1_i1	404	71.5368	-1.57164	0.243907	-6.44359	1.16682e-10	1.16272e-08	76	136	75	52	36	32
Mii78884_c0_g1_i3	2303	27.0172	-2.22546	0.34541	-6.44296	1.17168e-10	1.16683e-08	31	70	29	13	5	8
Mii57391_c0_g2_i1	912	30.3372	-2.19796	0.341393	-6.43822	1.20883e-10	1.20306e-08	36	68	35	17	8	5
Mii120043_c0_g1_i1	307	32.6311	-2.25161	0.349818	-6.43652	1.22243e-10	1.21582e-08	39	80	36	21	2	8
Mii73367_c1_g2_i2	1426	25.7366	-2.34065	0.363725	-6.43522	1.23293e-10	1.22512e-08	38	47	30	10	7	4
Mii79929_c2_g1_i4	1286	50.0521	-2.00278	0.311225	-6.43517	1.23334e-10	1.22512e-08	56	125	51	41	12	9
Mii66735_c1_g8_i1	383	261.288	-2.34563	0.36454	-6.4345	1.23879e-10	1.22975e-08	391	505	288	127	53	46
Mii59873_c3_g1_i1	230	34.6555	-2.08495	0.324104	-6.43296	1.2514e-10	1.24139e-08	34	77	43	16	13	9
Mii77437_c2_g1_i1	1817	81.5532	-1.6032	0.24922	-6.43288	1.2521e-10	1.24139e-08	79	157	91	58	47	29
Mii42354_c0_g1_i1	292	21.4974	-2.41993	0.376279	-6.4312	1.266e-10	1.25438e-08	40	55	15	5	5	6
Mii80065_c1_g1_i1	3162	154.558	-1.22705	0.190815	-6.43057	1.27125e-10	1.25878e-08	159	274	145	139	99	85
Mii80160_c0_g1_i3	3273	54.0257	-1.78023	0.276849	-6.43033	1.27323e-10	1.25996e-08	62	94	62	30	24	23
Mii79021_c7_g2_i1	234	23.0558	2.48436	0.386418	6.42921	1.28269e-10	1.26851e-08	0	5	6	50	51	47
Mii66735_c1_g4_i1	266	146.439	-2.37102	0.369146	-6.423	1.33611e-10	1.32051e-08	225	297	155	70	30	22
Mii80214_c1_g1_i8	1756	45.8521	-1.78032	0.277211	-6.42224	1.34284e-10	1.32632e-08	51	105	45	22	17	27
Mii56642_c0_g1_i1	648	16.2127	2.69491	0.419635	6.42203	1.34465e-10	1.32728e-08	2	3	0	35	35	41
Mii52136_c0_g1_i1	1591	234.501	0.918103	0.142966	6.42182	1.34656e-10	1.32832e-08	145	235	75	403	367	343
Mii72092_c0_g2_i1	226	75.7575	1.47803	0.23019	6.42093	1.35445e-10	1.33527e-08	26	56	24	155	107	147
Mii76937_c1_g1_i1	1091	2202.93	-1.91736	0.298668	-6.41971	1.36535e-10	1.34516e-08	2691	4577	2284	1454	839	641
Mii63577_c0_g3_i6	2010	82.6682	1.36334	0.212391	6.41903	1.3715e-10	1.35037e-08	36	71	21	153	136	148
Mii60945_c0_g1_i2	743	26.3364	-2.25779	0.351808	-6.41768	1.38371e-10	1.36154e-08	34	57	30	12	6	6
Mii71074_c1_g1_i1	1044	24.5306	-2.41094	0.375709	-6.41704	1.38946e-10	1.36595e-08	45	49	22	4	11	3
Mii76937_c1_g2_i1	290	552.494	-1.93205	0.301084	-6.41699	1.38993e-10	1.36595e-08	692	1163	561	376	187	165
Mii48729_c0_g1_i1	866	26.7677	-2.4504	0.381936	-6.41574	1.40144e-10	1.3764e-08	41	45	33	14	3	2
Mii39827_c0_g1_i1	906	24.7205	-2.39897	0.373946	-6.41529	1.40559e-10	1.37961e-08	39	51	26	13	4	2
Mii65366_c0_g1_i2	282	26.5782	2.41356	0.376275	6.41435	1.41422e-10	1.38721e-08	2	8	5	39	55	74
Mii80144_c1_g2_i6	3901	148.377	-1.39565	0.217609	-6.41357	1.42154e-10	1.39352e-08	139	256	163	119	92	69
Mii51810_c0_g1_i2	1477	30.2227	-2.19017	0.341704	-6.40955	1.45951e-10	1.42984e-08	42	61	33	17	7	6
Mii83365_c0_g1_i1	340	93.5608	1.31722	0.205514	6.40936	1.46133e-10	1.43073e-08	48	80	21	177	145	169
Mii80011_c1_g1_i4	460	18.5792	-2.61225	0.407586	-6.40908	1.46404e-10	1.4319e-08	22	36	27	2	3	4
Mii78520_c1_g1_i3	4827	123.249	-1.31369	0.204975	-6.40904	1.46435e-10	1.4319e-08	135	229	112	105	85	55
Mii78624_c1_g1_i3	1029	89.4467	-1.44898	0.22612	-6.40802	1.47417e-10	1.44061e-08	95	174	87	77	45	42
Mii47948_c0_g1_i1	428	14.6038	2.79706	0.436513	6.40773	1.477e-10	1.44247e-08	0	0	2	30	28	42
Mii77510_c3_g3_i2	2069	26.3337	-2.25684	0.352216	-6.40756	1.4787e-10	1.44323e-08	34	57	30	12	5	7
Mii78210_c4_g4_i1	1078	27.0452	-2.47618	0.386456	-6.40741	1.48015e-10	1.44375e-08	27	46	43	11	2	5
Mii77643_c3_g1_i1	1941	87.172	-1.46399	0.228498	-6.407	1.48411e-10	1.44608e-08	110	163	76	77	41	41
Mii49913_c0_g1_i2	376	25.52	-2.33929	0.365116	-6.40697	1.48438e-10	1.44608e-08	26	66	31	10	9	2
Mii42854_c0_g1_i1	1215	24.5936	-2.47344	0.386178	-6.4049	1.50465e-10	1.46491e-08	24	43	39	6	4	6
Mii70518_c6_g3_i1	1740	166.647	-1.24277	0.19415	-6.40104	1.54317e-10	1.50148e-08	158	291	168	141	106	97
Mii75442_c3_g1_i1	464	136.204	-2.27666	0.355886	-6.39715	1.58304e-10	1.53932e-08	156	272	175	66	31	29
Mii80332_c5_g1_i7	1957	70.8011	-1.5328	0.239668	-6.39551	1.60013e-10	1.55498e-08	69	152	71	49	43	30
Mii79922_c3_g6_i1	482	46.5645	-1.8502	0.289388	-6.3935	1.62133e-10	1.57459e-08	68	79	46	25	18	20
Mii64955_c1_g1_i1	531	18.027	2.67182	0.418025	6.39153	1.64233e-10	1.594e-08	1	1	3	30	41	48
Mii70314_c0_g1_i1	2909	48.2531	-1.74699	0.273341	-6.39127	1.64517e-10	1.59578e-08	65	96	44	24	19	28
Mii72697_c1_g1_i1	296	57.0048	-1.91672	0.299942	-6.3903	1.65561e-10	1.60491e-08	51	107	76	32	27	14
Mii72677_c0_g1_i1	263	187.601	-2.17291	0.340137	-6.38835	1.67687e-10	1.62452e-08	168	386	259	77	58	57
Mii79860_c3_g1_i9	2338	197.062	-2.28773	0.35823	-6.38622	1.70038e-10	1.64531e-08	294	446	192	106	41	35
Mii13293_c0_g1_i1	231	38.6885	-1.9892	0.311483	-6.38621	1.70043e-10	1.64531e-08	42	88	43	24	15	8
Mii59390_c0_g1_i1	730	74.3004	-1.63109	0.255444	-6.38533	1.71026e-10	1.65379e-08	75	167	74	66	30	26
Mii66284_c0_g1_i1	1121	49.6333	-1.87069	0.293003	-6.38454	1.71908e-10	1.6613e-08	48	134	49	36	22	10
Mii79413_c3_g4_i2	2062	29.5278	-2.25254	0.353001	-6.3811	1.75819e-10	1.69804e-08	37	59	36	15	9	3
Mii74885_c0_g1_i1	2753	86.9339	-1.40479	0.220229	-6.37877	1.78518e-10	1.72298e-08	85	176	85	60	58	44
Mii72796_c9_g1_i2	249	76.1518	-1.53365	0.240433	-6.37868	1.78621e-10	1.72298e-08	76	147	81	57	36	38
Mii80272_c7_g1_i1	7856	2431.72	-0.681254	0.106855	-6.37548	1.82391e-10	1.75826e-08	1998	4576	1812	2263	2221	2204
Mii79429_c0_g3_i6	2051	26.6176	-2.37281	0.372211	-6.3749	1.83082e-10	1.76384e-08	40	52	30	14	6	1
Mii76738_c4_g2_i4	671	11.0766	2.87599	0.45118	6.37437	1.83717e-10	1.76888e-08	0	0	0	29	25	26
Mii18235_c0_g1_i1	832	16.9573	-2.71164	0.425421	-6.37402	1.84137e-10	1.77183e-08	15	36	28	3	3	0
Mii75100_c1_g3_i1	1180	92.6132	-1.39989	0.219696	-6.37194	1.86651e-10	1.79492e-08	89	186	92	73	56	45
Mii78661_c0_g2_i3	2799	54.5942	-1.85746	0.291526	-6.37153	1.87157e-10	1.79868e-08	51	105	69	28	29	16
Mii66473_c3_g2_i9	528	24.3032	-2.32701	0.365326	-6.36967	1.8943e-10	1.81941e-08	29	53	30	10	6	4
Mii74901_c1_g1_i2	1541	14.5467	2.74915	0.431705	6.36812	1.91358e-10	1.8368e-08	2	1	0	36	38	27
Mii98885_c0_g1_i1	530	13.4319	-2.74397	0.431025	-6.36617	1.93813e-10	1.85923e-08	23	32	14	1	2	1
Mii73373_c0_g1_i2	3940	132.4	-2.64231	0.415061	-6.36606	1.93941e-10	1.85932e-08	130	308	193	40	17	11
Mii59958_c5_g1_i1	246	206.936	0.926055	0.145496	6.36481	1.95536e-10	1.87346e-08	114	211	74	341	306	334
Mii78495_c0_g1_i4	1924	24.2584	-2.25627	0.354514	-6.36441	1.96042e-10	1.87716e-08	35	56	24	9	6	7
Mii12122_c0_g2_i1	356	30.2098	-2.26383	0.355751	-6.36351	1.97192e-10	1.88702e-08	34	59	40	14	10	3
Mii79838_c2_g1_i2	8798	862.189	-0.625531	0.0983498	-6.36027	2.01401e-10	1.92572e-08	791	1604	570	964	775	708
Mii61658_c1_g1_i2	1180	21.8823	-2.44787	0.384872	-6.36021	2.01481e-10	1.92572e-08	26	46	29	9	3	3
Mii71703_c0_g1_i2	407	20.6345	-2.53084	0.398255	-6.35481	2.08682e-10	1.99332e-08	29	35	28	7	3	2
Mii79552_c1_g2_i2	1218	28.621	-2.28149	0.359043	-6.35436	2.09302e-10	1.99803e-08	36	52	37	14	7	4
Mii79654_c4_g6_i1	244	38.8643	-1.95957	0.30845	-6.35294	2.11233e-10	2.01524e-08	56	72	39	22	16	10
Mii74350_c6_g1_i4	1494	24114.2	-2.64072	0.415851	-6.35016	2.15085e-10	2.05074e-08	24579	41204	39345	6091	3287	3011
Mii72224_c2_g2_i5	369	31.681	2.13342	0.336032	6.34887	2.16899e-10	2.06678e-08	5	12	8	61	57	74
Mii54796_c0_g1_i1	459	14.3551	2.74587	0.432507	6.34874	2.17087e-10	2.06732e-08	0	2	1	31	38	30
Mii76885_c0_g1_i1	1321	24.6906	-2.34436	0.369351	-6.34724	2.19205e-10	2.08622e-08	29	57	30	12	6	2
Mii77030_c1_g1_i1	272	24.9186	-2.51783	0.39672	-6.34662	2.20099e-10	2.09345e-08	38	32	35	9	5	1
Mii61863_c0_g1_i1	2368	88.0391	-2.54268	0.400712	-6.3454	2.21852e-10	2.10884e-08	112	213	105	34	7	14
Mii11381_c0_g1_i1	294	1135.09	-2.74086	0.432012	-6.3444	2.2329e-10	2.12123e-08	1098	1515	2089	194	127	116
Mii80025_c0_g2_i6	4003	71.7736	-1.67994	0.264816	-6.34379	2.24178e-10	2.12838e-08	61	151	84	34	47	29
Mii65053_c0_g1_i1	2094	24.5557	-2.27027	0.358058	-6.3405	2.29027e-10	2.1731e-08	29	65	26	10	3	9
Mii80214_c1_g1_i4	1959	54.1239	-1.76707	0.278807	-6.33796	2.32824e-10	2.20778e-08	61	99	61	31	17	30
Mii78499_c3_g1_i3	1008	24.4913	-2.38476	0.376397	-6.33576	2.36172e-10	2.23818e-08	26	56	32	2	6	10
Mii75876_c2_g2_i5	2706	25.1448	-2.43008	0.383566	-6.33548	2.3661e-10	2.24097e-08	25	57	35	13	2	3
Mii36876_c0_g1_i1	333	104.58	-1.35276	0.213525	-6.33538	2.36753e-10	2.24097e-08	118	194	95	81	75	46
Mii79226_c5_g1_i4	7415	289.517	-0.971659	0.15354	-6.32838	2.47756e-10	2.34371e-08	272	530	244	267	243	183
Mii79852_c0_g1_i3	2880	30.0442	-2.14933	0.339716	-6.32684	2.50234e-10	2.36572e-08	38	69	32	17	10	4
Mii80157_c0_g1_i4	11827	274.545	-2.35303	0.371934	-6.32646	2.50855e-10	2.37016e-08	315	569	356	127	52	51
Mii101481_c0_g1_i1	334	54.6628	-1.71283	0.270794	-6.32519	2.5292e-10	2.38823e-08	55	125	56	35	32	16
Mii74032_c0_g1_i5	985	28.9279	-2.26231	0.357706	-6.32449	2.54078e-10	2.39772e-08	39	54	35	16	6	4
Mii79931_c3_g1_i2	1309	294.352	-0.916391	0.144915	-6.32366	2.55437e-10	2.4091e-08	270	551	240	289	236	201
Mii52201_c2_g1_i1	712	1185.48	-0.630569	0.0997258	-6.32302	2.56493e-10	2.4176e-08	1131	2063	806	1354	988	1018
Mii69712_c0_g1_i4	3886	28.4954	-2.16277	0.342057	-6.32282	2.56833e-10	2.41935e-08	29	75	32	15	6	8
Mii75177_c2_g1_i8	609	13.2731	2.77121	0.438342	6.32204	2.58135e-10	2.43016e-08	0	1	1	35	25	33
Mii64646_c0_g1_i2	370	149.115	1.29658	0.205114	6.32127	2.59426e-10	2.44084e-08	90	87	43	321	224	231
Mii74535_c0_g1_i1	4013	26.9376	-2.23314	0.353318	-6.32049	2.60733e-10	2.45167e-08	26	71	32	11	10	4
Mii55329_c0_g1_i1	460	20.2406	-2.55042	0.403553	-6.3199	2.61735e-10	2.45962e-08	19	46	30	3	1	7
Mii80086_c2_g1_i2	535	29.1375	-2.20847	0.349459	-6.31969	2.62097e-10	2.46154e-08	35	70	32	14	12	2
Mii80011_c1_g1_i3	6748	360.152	-2.30449	0.364724	-6.31846	2.64175e-10	2.47957e-08	383	868	439	169	95	56
Mii65321_c0_g1_i3	706	13.8547	2.79497	0.442523	6.316	2.68415e-10	2.51786e-08	0	2	0	30	20	48
Mii60209_c0_g1_i1	411	23.8859	-2.33532	0.369817	-6.3148	2.70504e-10	2.53594e-08	28	49	31	8	7	4
Mii73386_c2_g1_i11	394	57.6522	-2.65161	0.419925	-6.31448	2.71074e-10	2.53977e-08	83	81	85	14	7	6
Mii80090_c4_g1_i2	1754	21.0735	-2.3445	0.371534	-6.31033	2.7844e-10	2.60722e-08	30	55	20	8	4	5
Mii78113_c0_g2_i1	2873	55.8487	1.64097	0.260085	6.30935	2.80207e-10	2.6222e-08	14	45	14	110	90	114
Mii63259_c0_g2_i2	318	104	1.30141	0.206399	6.30531	2.87611e-10	2.68988e-08	57	69	31	214	161	165
Mii49531_c0_g1_i2	498	5147.25	-2.49363	0.395646	-6.30269	2.92527e-10	2.73358e-08	5949	7274	8094	1401	1026	989
Mii44987_c0_g2_i2	291	11.5427	-2.8365	0.45005	-6.30263	2.92632e-10	2.73358e-08	15	22	18	0	0	1
Mii65887_c2_g1_i1	229	53.0331	-1.60234	0.254299	-6.30101	2.95709e-10	2.76068e-08	65	123	43	37	29	22
Mii74871_c0_g2_i2	496	33.1087	-2.1109	0.335037	-6.30049	2.96714e-10	2.76841e-08	36	66	42	18	9	8
Mii72697_c4_g1_i1	816	170.358	-2.32463	0.368987	-6.30002	2.97599e-10	2.77502e-08	186	345	228	75	41	30
Mii69110_c4_g1_i3	537	13.4555	2.75442	0.437216	6.2999	2.97845e-10	2.77566e-08	1	0	1	32	32	29
Mii79558_c1_g2_i2	2909	192.039	-0.953296	0.151329	-6.2995	2.98602e-10	2.78106e-08	186	368	151	169	147	147
Mii49531_c0_g1_i1	496	5071.82	-2.49397	0.395956	-6.29861	3.00335e-10	2.79554e-08	5883	7248	7938	1405	1053	904
Mii38853_c0_g1_i1	1575	25.6859	-2.30367	0.36577	-6.29812	3.01269e-10	2.80257e-08	31	63	29	13	1	8
Mii74901_c1_g1_i3	1975	16.0593	2.63952	0.419109	6.29794	3.01621e-10	2.80418e-08	2	2	1	47	33	30
Mii79101_c3_g1_i1	1055	474.87	-2.25846	0.358629	-6.2975	3.0249e-10	2.81059e-08	558	1023	574	246	108	93
Mii51463_c1_g1_i1	1461	26.4417	-2.26096	0.359144	-6.29542	3.0657e-10	2.84682e-08	26	59	35	6	9	8
Mii79754_c0_g1_i1	10331	308.466	-0.935606	0.148661	-6.29357	3.10251e-10	2.87929e-08	268	608	254	311	241	204
Mii79852_c0_g1_i11	2881	38.3545	-2.04081	0.324362	-6.29177	3.13869e-10	2.91114e-08	46	75	45	25	12	7
Mii70702_c0_g3_i1	482	146.3	2.83239	0.450228	6.29101	3.15413e-10	2.92373e-08	1	8	10	314	375	328
Mii45890_c0_g1_i1	1369	193.271	2.85856	0.454825	6.28497	3.27907e-10	3.03775e-08	1	7	10	411	409	535
Mii66473_c3_g2_i8	404	24.8947	-2.40092	0.382166	-6.28241	3.33368e-10	3.08652e-08	24	50	37	10	2	6
Mii120147_c0_g1_i1	656	19.8128	-2.58942	0.412388	-6.27908	3.40576e-10	3.14983e-08	11	63	29	6	2	2
Mii74656_c2_g1_i2	631	23.1584	-2.35465	0.375	-6.27907	3.40608e-10	3.14983e-08	26	51	30	10	5	3
Mii53678_c0_g1_i2	651	22.6518	2.33925	0.372653	6.27729	3.44523e-10	3.18416e-08	4	7	3	52	42	51
Mii79848_c1_g8_i2	1754	40.3835	-1.8296	0.291497	-6.27657	3.46118e-10	3.19701e-08	47	94	39	25	19	12
Mii71495_c0_g1_i1	1356	19.6246	-2.40698	0.383493	-6.27648	3.46325e-10	3.19704e-08	26	47	22	6	4	4
Mii71136_c1_g1_i5	234	12.2656	2.7958	0.445557	6.27484	3.50005e-10	3.22911e-08	1	0	0	24	31	31
Mii72592_c1_g2_i1	6189	290.201	-0.807308	0.128716	-6.27201	3.56416e-10	3.28632e-08	268	598	199	290	247	221
Mii71673_c0_g1_i1	2031	882.632	0.612158	0.0976081	6.2716	3.57366e-10	3.29314e-08	556	1006	380	1323	1246	1273
Mii27697_c0_g1_i1	583	17.0562	-2.64476	0.421828	-6.26976	3.61602e-10	3.33023e-08	18	33	27	5	1	1
Mii73311_c3_g1_i5	660	155.214	1.20242	0.191783	6.26965	3.61854e-10	3.33058e-08	87	132	40	222	257	304
Mii34678_c0_g1_i1	415	20.0388	2.44245	0.389613	6.2689	3.63606e-10	3.34475e-08	3	7	1	52	36	45
Mii80005_c1_g1_i3	3155	42.6795	-1.89847	0.302992	-6.26574	3.71064e-10	3.41135e-08	57	102	37	34	13	10
Mii22808_c0_g1_i1	640	16.4196	-2.58674	0.41285	-6.26557	3.71458e-10	3.41297e-08	24	35	20	5	2	1
Mii67237_c0_g1_i1	1463	780.564	0.773049	0.123393	6.26491	3.73031e-10	3.42542e-08	496	822	287	1103	1318	1118
Mii74818_c0_g3_i2	1008	22.0453	-2.32782	0.371712	-6.26242	3.7906e-10	3.47766e-08	33	51	22	10	3	5
Mii76937_c0_g5_i1	322	605.437	-1.96712	0.314118	-6.26237	3.79164e-10	3.47766e-08	755	1288	626	401	201	164
Mii62017_c0_g1_i1	1630	2019.96	-1.8001	0.287475	-6.26176	3.80662e-10	3.48936e-08	1934	4214	2336	1225	909	772
Mii79674_c1_g1_i5	1429	29.7633	-2.10061	0.335522	-6.26072	3.83193e-10	3.51051e-08	39	66	31	16	5	11
Mii78175_c3_g3_i5	2330	18.7568	-2.54653	0.407148	-6.25454	3.98683e-10	3.65027e-08	23	35	27	6	3	1
Mii77215_c1_g2_i5	1996	28.4401	-2.17948	0.348631	-6.25153	4.06454e-10	3.71925e-08	42	56	30	16	5	7
Mii64562_c0_g1_i8	652	789.585	-0.664383	0.106281	-6.25118	4.07353e-10	3.72531e-08	661	1571	546	859	686	658
Mii79521_c0_g1_i1	1903	45.1378	-1.97502	0.315952	-6.25101	4.07811e-10	3.72732e-08	43	94	57	29	8	18
Mii80062_c10_g2_i3	557	56.4052	-1.73659	0.277837	-6.25041	4.09389e-10	3.73957e-08	63	110	61	42	26	16
Mii58121_c0_g1_i1	235	57.764	-1.5818	0.253097	-6.24977	4.11067e-10	3.75271e-08	67	122	53	38	36	22
Mii77722_c1_g1_i2	5129	1138.93	-2.38513	0.381665	-6.24927	4.12363e-10	3.76234e-08	1244	2288	1564	489	213	197
Mii65784_c0_g1_i1	401	25.9188	-2.19799	0.35173	-6.24909	4.1286e-10	3.76469e-08	28	67	29	13	7	5
Mii75177_c2_g1_i9	521	13.856	2.70851	0.433442	6.24884	4.13504e-10	3.76837e-08	0	2	1	41	29	27
Mii123365_c0_g1_i1	241	150.601	-1.1709	0.18742	-6.24748	4.17133e-10	3.79923e-08	135	294	141	115	117	90
Mii70085_c0_g1_i2	989	21.8114	2.454	0.392898	6.2459	4.21364e-10	3.83463e-08	2	6	3	37	39	65
Mii74099_c2_g1_i1	3854	899.639	0.586462	0.0938964	6.24585	4.21509e-10	3.83463e-08	540	1119	384	1429	1301	1174
Mii58959_c0_g1_i1	1622	123.419	1.15255	0.184573	6.24441	4.25402e-10	3.8678e-08	53	114	44	238	169	214
Mii66775_c0_g1_i1	279	15.0417	2.66483	0.426864	6.24279	4.29827e-10	3.90577e-08	1	2	1	29	39	34
Mii75058_c2_g1_i1	253	20.5466	-2.46763	0.39529	-6.24259	4.30385e-10	3.90857e-08	23	42	29	8	3	2
Mii52937_c0_g1_i1	789	22.0677	-2.3602	0.378103	-6.24222	4.31405e-10	3.91557e-08	25	59	25	8	8	1
Mii71407_c3_g2_i1	615	30.9908	2.16501	0.346931	6.24046	4.36274e-10	3.95747e-08	5	8	9	55	64	68
Mii79159_c3_g1_i1	1682	55.2536	-1.84249	0.295417	-6.2369	4.46322e-10	4.04512e-08	58	111	64	42	22	12
Mii48724_c0_g1_i3	389	28.153	-2.09803	0.336393	-6.23686	4.46453e-10	4.04512e-08	33	65	31	13	9	8
Mii63926_c0_g1_i1	851	219.812	-1.93489	0.310281	-6.23592	4.49135e-10	4.06707e-08	199	461	276	114	87	79
Mii33133_c0_g1_i1	391	30.654	-2.11659	0.339751	-6.22985	4.66895e-10	4.22545e-08	42	59	34	16	11	5
Mii61756_c0_g1_i2	1117	24.659	-2.24005	0.359611	-6.22911	4.69106e-10	4.24301e-08	43	70	15	10	9	4
Mii77473_c5_g6_i4	352	48.1818	-1.80636	0.290008	-6.22863	4.70518e-10	4.25333e-08	59	86	53	29	24	14
Mii73003_c1_g1_i2	315	12.9548	2.73603	0.439339	6.22761	4.73614e-10	4.27885e-08	0	1	1	30	33	27
Mii76844_c2_g1_i5	430	23.8247	-2.27349	0.365147	-6.22623	4.77783e-10	4.31403e-08	30	61	25	13	5	3
Mii67841_c1_g1_i1	229	77.7449	-1.47856	0.237548	-6.22424	4.83895e-10	4.3667e-08	77	168	75	68	39	33
Mii58153_c0_g1_i1	259	43.8972	1.83348	0.294728	6.22091	4.94274e-10	4.45779e-08	11	25	11	70	88	94
Mii59400_c0_g2_i1	228	34.5746	-2.03012	0.326462	-6.21855	5.01756e-10	4.52267e-08	40	63	43	17	12	10
Mii80268_c1_g1_i3	945	51.6547	-1.72876	0.278016	-6.21819	5.02913e-10	4.5305e-08	50	112	57	35	25	17
Mii62683_c3_g2_i1	328	15.8536	-2.64931	0.42624	-6.21554	5.11486e-10	4.60507e-08	17	31	25	4	1	1
Mii79674_c1_g3_i1	1263	34.931	-1.95512	0.31466	-6.21345	5.18347e-10	4.66417e-08	46	71	36	21	12	10
Mii34060_c0_g1_i1	430	19.3115	-2.62364	0.422266	-6.21324	5.19029e-10	4.66763e-08	16	35	34	3	5	0
Mii73945_c1_g1_i2	3155	664.589	0.761414	0.122589	6.21112	5.26077e-10	4.72829e-08	390	793	237	1187	1070	785
Mii62683_c2_g1_i1	331	33.3394	-2.18888	0.35259	-6.20802	5.36554e-10	4.8197e-08	31	64	48	18	6	8
Mii74656_c3_g1_i2	421	17.2769	-2.55728	0.411943	-6.20786	5.37096e-10	4.8218e-08	19	46	22	7	2	0
Mii80283_c3_g1_i4	743	20.6743	-2.34093	0.377157	-6.20677	5.40831e-10	4.85255e-08	25	50	24	6	6	4
Mii71495_c0_g1_i11	1331	20.0445	-2.37339	0.382482	-6.20524	5.46144e-10	4.89742e-08	30	48	20	8	5	2
Mii79586_c0_g1_i3	436	28.9976	-2.26092	0.3644	-6.2045	5.48699e-10	4.91753e-08	38	42	40	12	6	7
Mii12421_c0_g2_i1	447	10.5096	2.8077	0.45263	6.20308	5.53685e-10	4.95937e-08	0	0	0	28	22	26
Mii66965_c1_g1_i1	276	27.2773	2.23117	0.359696	6.20293	5.54218e-10	4.96131e-08	8	8	3	44	61	64
Mii80442_c0_g1_i1	789	22.7142	-2.39534	0.386175	-6.20273	5.54937e-10	4.96491e-08	22	45	34	8	4	4
Mii73551_c0_g2_i2	1101	22.0874	2.36673	0.381615	6.20187	5.57962e-10	4.98913e-08	4	4	4	53	51	37
Mii62469_c0_g1_i1	1292	506.04	0.805139	0.129828	6.2016	5.58932e-10	4.9933e-08	321	503	189	731	832	750
Mii78589_c0_g1_i1	3857	77.364	-1.33041	0.214529	-6.20156	5.59066e-10	4.9933e-08	91	161	61	59	49	44
Mii109974_c0_g1_i1	301	10.7681	2.80841	0.452891	6.20108	5.6078e-10	5.00538e-08	0	0	0	22	23	32
Mii75177_c2_g1_i6	561	13.0282	2.72895	0.440083	6.201	5.61057e-10	5.00538e-08	0	1	1	41	29	22
Mii57601_c0_g1_i1	365	230.516	2.82986	0.45641	6.20026	5.63709e-10	5.02618e-08	1	8	11	525	500	598
Mii75369_c1_g1_i3	812	46.863	1.74072	0.280767	6.19988	5.6506e-10	5.03415e-08	19	26	9	83	96	87
Mii68004_c2_g3_i2	314	14.2843	2.67511	0.431481	6.19983	5.65246e-10	5.03415e-08	2	0	1	37	27	34
Mii73605_c3_g2_i3	1080	14.8777	-2.62658	0.423666	-6.19965	5.65888e-10	5.03701e-08	21	32	19	3	0	3
Mii72319_c4_g2_i2	351	194.527	-1.9073	0.307836	-6.19582	5.7981e-10	5.158e-08	193	417	228	115	56	84
Mii35017_c0_g1_i1	674	14.1256	2.6772	0.432125	6.19543	5.81265e-10	5.16802e-08	0	1	2	38	27	32
Mii79198_c4_g6_i4	532	30.6468	-2.05284	0.331389	-6.19467	5.8407e-10	5.19001e-08	37	81	29	20	9	6
Mii67781_c0_g2_i1	306	26.3461	2.17108	0.350484	6.19454	5.84556e-10	5.19139e-08	7	12	2	56	55	54
Mii76546_c2_g1_i5	1136	25.5888	-2.27833	0.367803	-6.19443	5.84962e-10	5.19205e-08	33	52	31	14	5	3
Mii76864_c2_g3_i2	1072	26.7127	-2.28379	0.368847	-6.19171	5.95164e-10	5.27962e-08	31	44	38	8	9	5
Mii415_c0_g2_i1	246	16.8205	2.54668	0.411378	6.19061	5.99305e-10	5.31334e-08	1	5	1	36	40	37
Mii74931_c3_g1_i5	2299	174.168	0.951954	0.153778	6.19044	5.99962e-10	5.31616e-08	93	190	56	296	269	271
Mii56819_c0_g1_i3	696	23.8687	2.26202	0.365483	6.18912	6.04995e-10	5.35772e-08	3	11	3	54	54	44
Mii78142_c0_g1_i3	5641	240.679	-2.33219	0.376861	-6.18847	6.07528e-10	5.37712e-08	217	493	353	95	52	52
Mii21_c0_g1_i1	428	23.4045	2.283	0.36907	6.18583	6.1778e-10	5.46477e-08	6	6	3	60	43	46
Mii65893_c0_g1_i1	358	128.57	-2.35666	0.381101	-6.18383	6.25645e-10	5.53037e-08	130	230	192	42	35	24
Mii24036_c0_g1_i1	1378	19.7529	-2.44202	0.394908	-6.18377	6.25901e-10	5.53037e-08	27	42	24	9	2	2
Mii50903_c0_g1_i1	285	33.6776	-2.21186	0.357801	-6.1818	6.33728e-10	5.59637e-08	42	46	48	16	8	7
Mii57890_c1_g2_i1	225	29.0292	-2.18966	0.354263	-6.18089	6.37403e-10	5.62566e-08	42	46	35	8	12	7
Mii55265_c0_g1_i1	1098	16.6761	-2.48971	0.402831	-6.18053	6.38873e-10	5.63545e-08	29	43	14	5	3	2
Mii65550_c0_g1_i1	313	28.0028	-2.17141	0.351343	-6.18032	6.39726e-10	5.63981e-08	28	62	36	11	11	5
Mii58135_c0_g1_i1	734	19.1443	-2.58232	0.417984	-6.17803	6.49059e-10	5.71887e-08	21	32	31	7	1	1
Mii71136_c1_g1_i2	234	10.8321	2.797	0.453289	6.17046	6.80925e-10	5.99627e-08	0	0	0	19	26	32
Mii76937_c1_g3_i1	290	347.868	-1.78205	0.288833	-6.16982	6.83663e-10	6.017e-08	407	772	337	255	148	107
Mii72796_c10_g1_i7	607	102.39	-1.28521	0.208345	-6.16865	6.88757e-10	6.05843e-08	94	222	93	79	76	51
Mii75085_c0_g3_i5	2600	31.4265	-2.02046	0.327644	-6.16664	6.97583e-10	6.13263e-08	38	66	35	17	11	8
Mii57112_c0_g1_i1	1141	24.1361	-2.22206	0.360497	-6.16387	7.09904e-10	6.23745e-08	30	53	28	11	6	5
Mii70761_c3_g2_i7	946	12.8952	2.71352	0.440367	6.16195	7.18538e-10	6.30977e-08	0	1	1	25	30	34
Mii74235_c1_g1_i2	575	1030.32	-2.01778	0.327633	-6.15865	7.33679e-10	6.43912e-08	1356	2250	1029	655	332	247
Mii76830_c2_g1_i1	2677	615.922	-0.673684	0.109399	-6.15804	7.36498e-10	6.46025e-08	574	1147	417	647	581	478
Mii79952_c2_g2_i4	757	29.9185	-2.02675	0.329167	-6.15721	7.40361e-10	6.4905e-08	42	79	24	18	11	6
Mii67515_c5_g1_i2	542	235.548	-2.32325	0.377386	-6.15615	7.45338e-10	6.52798e-08	292	445	305	104	57	36
Mii72342_c1_g1_i1	450	34.406	-2.09049	0.339579	-6.15612	7.45469e-10	6.52798e-08	26	83	46	9	15	12
Mii79633_c3_g1_i3	3044	552.706	0.669902	0.108829	6.15556	7.48146e-10	6.54776e-08	327	714	202	846	766	847
Mii80180_c0_g1_i5	6341	484.818	-0.804325	0.130717	-6.15317	7.5947e-10	6.64316e-08	432	1006	340	501	445	323
Mii37525_c1_g1_i1	446	48.359	1.66986	0.271443	6.1518	7.66066e-10	6.69712e-08	13	32	14	93	88	90
Mii80327_c0_g2_i3	5736	222.509	-2.14126	0.348145	-6.15048	7.72468e-10	6.74932e-08	280	469	250	129	57	48
Mii79702_c0_g1_i4	309	27.0037	-2.20832	0.35914	-6.1489	7.80206e-10	6.81313e-08	30	55	35	14	6	5
Mii79960_c1_g1_i2	1117	17.0027	-2.48642	0.404452	-6.14763	7.86484e-10	6.86413e-08	22	42	20	6	1	3
Mii73426_c0_g1_i1	320	16.5035	-2.51495	0.409139	-6.14693	7.89981e-10	6.89082e-08	19	50	18	2	6	1
Mii61810_c0_g1_i1	1340	1316.58	0.561292	0.0913528	6.14422	8.03588e-10	7.00561e-08	908	1660	490	2068	1840	1775
Mii80214_c1_g1_i2	1757	51.065	-1.87244	0.304793	-6.14334	8.08041e-10	7.04052e-08	55	88	64	30	11	26
Mii80191_c0_g2_i2	856	38.7095	-2.03238	0.330945	-6.14114	8.19318e-10	7.1348e-08	48	71	46	24	15	5
Mii73551_c0_g2_i4	1151	24.2171	2.25391	0.36705	6.14061	8.22032e-10	7.15149e-08	5	7	4	51	41	60
Mii38144_c0_g2_i1	320	18.3991	-2.46332	0.401154	-6.14059	8.22147e-10	7.15149e-08	20	39	26	4	4	3
Mii76288_c4_g1_i1	1566	27.11	-2.13981	0.348529	-6.13955	8.27559e-10	7.19458e-08	34	54	32	12	9	6
Mii75442_c0_g1_i1	591	142.874	-2.06061	0.335696	-6.13831	8.34021e-10	7.24674e-08	149	272	185	69	53	38
Mii67844_c3_g6_i4	1519	383.613	0.910439	0.148343	6.13741	8.3879e-10	7.28414e-08	241	315	148	646	515	648
Mii72651_c0_g1_i2	1094	19.0444	-2.376	0.387205	-6.1363	8.44658e-10	7.33103e-08	32	48	16	7	5	2
Mii78277_c1_g2_i4	346	51.7014	-1.78181	0.290402	-6.13567	8.48016e-10	7.35611e-08	47	111	61	38	18	18
Mii75086_c5_g5_i1	330	82.8863	1.30667	0.213037	6.13354	8.59426e-10	7.45096e-08	32	67	29	158	135	137
Mii35117_c0_g2_i1	1165	14.8447	-2.65343	0.432619	-6.1334	8.60216e-10	7.45369e-08	18	27	23	4	0	1
Mii73311_c3_g1_i4	725	200.275	1.05972	0.172785	6.13314	8.6162e-10	7.46172e-08	104	178	71	288	299	387
Mii70136_c2_g1_i1	439	21.8445	-2.28268	0.372194	-6.13302	8.62239e-10	7.46296e-08	29	50	24	5	9	4
Mii78351_c1_g6_i1	233	53.7591	-1.6985	0.276962	-6.13262	8.64448e-10	7.47796e-08	59	110	56	29	36	16
Mii78797_c3_g1_i1	3252	610.071	0.651924	0.106337	6.13072	8.74827e-10	7.56356e-08	377	773	224	943	814	944
Mii50818_c0_g1_i1	1325	20.6914	-2.44591	0.398988	-6.13029	8.77195e-10	7.57985e-08	18	47	31	6	1	6
Mii55198_c2_g3_i1	227	32.9433	-2.00062	0.326359	-6.13011	8.78159e-10	7.584e-08	34	82	36	21	7	11
Mii78995_c1_g1_i3	2082	32.025	-2.30264	0.37564	-6.12991	8.79316e-10	7.58835e-08	27	52	53	15	5	6
Mii73003_c1_g1_i4	326	10.5276	2.77959	0.453451	6.12985	8.7963e-10	7.58835e-08	0	0	0	20	27	28
Mii25185_c0_g1_i1	697	18.4048	-2.42285	0.395604	-6.12442	9.10146e-10	7.84728e-08	20	44	24	5	4	3
Mii80219_c1_g2_i2	828	41.1919	-2.0061	0.327576	-6.12406	9.12212e-10	7.86077e-08	47	94	45	30	4	15
Mii68549_c1_g1_i1	1299	27.9679	-2.12285	0.346652	-6.12387	9.1331e-10	7.86591e-08	32	55	35	9	10	9
Mii78274_c2_g2_i4	271	53.9257	1.61627	0.263946	6.12348	9.15561e-10	7.88096e-08	20	32	15	123	78	100
Mii79044_c3_g1_i3	277	180.572	-1.06036	0.173178	-6.12293	9.18689e-10	7.90355e-08	167	325	165	153	130	127
Mii79309_c0_g2_i3	1704	18.3551	-2.4305	0.397005	-6.12208	9.23628e-10	7.94168e-08	20	47	23	7	2	3
Mii32356_c0_g2_i1	448	3819.77	-2.69605	0.440391	-6.12193	9.24464e-10	7.94451e-08	3751	4779	7150	528	446	361
Mii80266_c1_g1_i4	421	25.1508	-2.29531	0.375067	-6.11975	9.37235e-10	8.04985e-08	27	43	37	7	7	6
Mii48163_c0_g1_i1	1756	43.2975	-1.77884	0.290743	-6.11826	9.46002e-10	8.1207e-08	40	100	48	19	23	19
Mii31563_c0_g1_i1	361	17.6394	-2.6806	0.438188	-6.11748	9.5067e-10	8.1563e-08	12	25	36	1	1	3
Mii50896_c0_g1_i1	1177	32.7647	-1.98594	0.324682	-6.11657	9.5612e-10	8.19857e-08	34	77	37	20	10	9
Mii72291_c0_g1_i2	980	16.3266	-2.58916	0.423354	-6.11584	9.6051e-10	8.23171e-08	13	42	25	3	0	4
Mii57683_c0_g1_i1	723	25.0628	-2.20325	0.360294	-6.11515	9.64674e-10	8.26288e-08	34	49	29	10	9	4
Mii79429_c0_g3_i9	2541	23.3607	-2.22718	0.36432	-6.11324	9.76296e-10	8.35787e-08	32	52	25	10	8	3
Mii66735_c0_g1_i2	658	315.034	-2.25877	0.369529	-6.11257	9.80406e-10	8.38846e-08	469	691	316	162	78	47
Mii53397_c0_g1_i1	293	40.0794	-1.96386	0.32146	-6.10919	1.0014e-09	8.56343e-08	41	71	53	23	12	13
Mii76738_c4_g1_i1	279	11.4718	2.72928	0.44686	6.10767	1.01097e-09	8.64054e-08	1	0	0	27	25	29
Mii70107_c3_g1_i5	635	46.4564	-1.66523	0.272728	-6.10581	1.02278e-09	8.73187e-08	47	105	47	26	23	23
Mii61629_c1_g1_i1	1644	27.5851	-2.18668	0.358132	-6.1058	1.02285e-09	8.73187e-08	30	56	36	14	8	4
Mii74745_c0_g3_i3	2672	455.014	-0.901102	0.147583	-6.10573	1.02333e-09	8.73187e-08	438	766	382	486	313	337
Mii41453_c0_g1_i1	272	22.0598	2.3332	0.382172	6.10511	1.02731e-09	8.76112e-08	5	3	4	44	46	49
Mii40033_c0_g1_i1	361	344.087	-2.74905	0.450367	-6.10403	1.03429e-09	8.81585e-08	303	382	698	30	26	28
Mii57986_c0_g1_i1	2245	468.371	0.730847	0.119755	6.10284	1.04198e-09	8.87655e-08	309	541	157	709	682	723
Mii73003_c1_g1_i3	359	12.5775	2.68985	0.44078	6.10249	1.0443e-09	8.89146e-08	0	1	1	27	33	27
Mii55105_c0_g1_i2	1076	16.5613	-2.4699	0.404876	-6.10039	1.05812e-09	9.00427e-08	20	48	18	6	1	3
Mii2443_c0_g1_i1	229	11.1215	2.73376	0.448136	6.10029	1.05874e-09	9.0046e-08	0	1	0	32	23	25
Mii79654_c4_g4_i3	236	27.5897	-2.07398	0.339996	-6.1	1.06068e-09	9.01627e-08	28	73	30	14	9	7
Mii62147_c0_g1_i1	888	22.1001	-2.25875	0.370345	-6.09904	1.06709e-09	9.06581e-08	31	48	24	10	5	4
Mii65343_c0_g1_i1	474	25.8806	-2.10761	0.34564	-6.09771	1.07601e-09	9.13667e-08	35	59	26	13	8	6
Mii79874_c8_g2_i1	245	66.4696	-1.45846	0.239195	-6.09739	1.07814e-09	9.14981e-08	77	135	59	51	41	28
Mii121518_c0_g1_i1	462	10.3845	2.76625	0.453752	6.09638	1.08495e-09	9.20255e-08	0	0	0	34	17	25
Mii31755_c0_g1_i1	340	13.2934	2.65213	0.435059	6.09601	1.08746e-09	9.2189e-08	0	2	1	32	26	34
Mii51157_c0_g1_i1	1075	24.9123	-2.21635	0.363588	-6.09578	1.08905e-09	9.22735e-08	31	48	31	5	8	9
Mii32356_c0_g1_i1	448	3831.45	-2.68919	0.441177	-6.09548	1.09109e-09	9.23963e-08	3803	4759	7161	538	452	340
Mii79777_c0_g1_i2	7525	322.387	-2.14579	0.352178	-6.09293	1.10865e-09	9.37885e-08	353	693	394	170	98	65
Mii62302_c2_g2_i1	672	16.2288	-2.57437	0.422519	-6.09292	1.10872e-09	9.37885e-08	22	26	24	3	1	3
Mii79316_c0_g1_i6	1534	32.4009	-2.16062	0.354639	-6.09244	1.112e-09	9.40151e-08	37	62	42	21	6	5
Mii77125_c1_g3_i3	3543	116.434	-1.26571	0.207795	-6.09114	1.12108e-09	9.47319e-08	120	209	111	97	81	58
Mii70761_c3_g2_i11	881	13.073	2.67486	0.439204	6.09025	1.12734e-09	9.52095e-08	0	0	2	35	30	25
Mii63028_c1_g1_i1	1255	23.8023	-2.18588	0.358931	-6.08999	1.12916e-09	9.53118e-08	25	71	24	12	6	5
Mii80214_c2_g2_i3	1915	55.3806	-1.67723	0.275428	-6.08956	1.13223e-09	9.55192e-08	60	98	63	30	32	22
Mii68307_c0_g2_i2	566	17.2557	-2.43561	0.400198	-6.08602	1.15755e-09	9.76026e-08	23	44	19	6	4	1
Mii104049_c0_g1_i1	426	15.4688	-2.59923	0.427217	-6.08409	1.17154e-09	9.87292e-08	15	31	25	2	3	1
Mii67494_c0_g1_i2	536	22.2973	-2.24234	0.368586	-6.08361	1.17505e-09	9.8972e-08	32	59	20	11	2	7
Mii76738_c2_g3_i1	356	12.3472	2.72272	0.447597	6.08297	1.17979e-09	9.9318e-08	0	0	1	18	32	35
Mii79456_c2_g1_i7	656	13.1599	2.6454	0.434988	6.08153	1.19038e-09	1.00155e-07	0	2	1	32	30	29
Mii50001_c0_g2_i1	677	17.0365	-2.4638	0.405158	-6.08109	1.1937e-09	1.00381e-07	24	35	21	5	3	2
Mii78830_c0_g1_i1	5634	336.317	-0.813998	0.133871	-6.08046	1.19841e-09	1.00723e-07	321	594	260	331	285	253
Mii80272_c6_g1_i8	299	61.3866	-1.62197	0.266785	-6.07967	1.20433e-09	1.01166e-07	59	112	72	34	33	30
Mii79615_c12_g1_i2	476	119.309	-1.11647	0.18372	-6.07703	1.22427e-09	1.02761e-07	117	244	98	99	91	74
Mii47855_c0_g1_i1	1046	22.8767	-2.27371	0.374151	-6.07699	1.22462e-09	1.02761e-07	25	49	30	10	5	4
Mii77345_c1_g4_i2	1331	44.0646	-1.83655	0.302253	-6.07621	1.23056e-09	1.03204e-07	59	79	46	32	13	15
Mii65334_c0_g1_i4	421	19.1684	-2.58739	0.425869	-6.07555	1.23566e-09	1.03576e-07	22	22	34	5	2	1
Mii79226_c5_g1_i5	7397	295.247	-0.974121	0.160401	-6.07304	1.25512e-09	1.05151e-07	261	551	257	301	222	186
Mii76069_c4_g1_i8	329	36.7023	-2.13139	0.351047	-6.07151	1.26711e-09	1.06099e-07	57	49	44	20	12	5
Mii77386_c1_g1_i2	4884	60.3623	-1.51738	0.249935	-6.07108	1.27053e-09	1.06328e-07	66	154	47	40	22	44
Mii68274_c0_g1_i2	967	1060.83	0.540476	0.0890367	6.07026	1.27705e-09	1.06817e-07	697	1308	442	1585	1440	1511
Mii80273_c0_g1_i2	3382	89.2714	-1.31386	0.216487	-6.06901	1.28701e-09	1.07538e-07	81	186	86	71	54	51
Mii75177_c2_g1_i7	545	10.1859	2.75414	0.453804	6.06901	1.28704e-09	1.07538e-07	0	0	0	23	28	22
Mii117977_c0_g1_i1	237	31.4329	-2.09973	0.346042	-6.06785	1.29635e-09	1.08241e-07	31	57	44	11	9	12
Mii77352_c2_g1_i1	531	213.756	-2.17177	0.357917	-6.06779	1.29683e-09	1.08241e-07	294	475	220	122	55	38
Mii68612_c1_g1_i3	766	20.03	-2.33524	0.384933	-6.06662	1.30631e-09	1.08974e-07	28	48	21	3	3	9
Mii80014_c0_g1_i1	3180	145.677	-1.10978	0.183024	-6.0636	1.33105e-09	1.10979e-07	140	264	133	124	103	95
Mii51083_c0_g1_i1	515	625.536	-2.17271	0.358575	-6.05929	1.36721e-09	1.13933e-07	856	1318	670	358	144	128
Mii55080_c0_g1_i1	1926	28.083	-2.32262	0.383325	-6.05914	1.36849e-09	1.13979e-07	24	57	43	15	5	2
Mii77485_c4_g1_i2	603	20.7477	-2.28678	0.377426	-6.05888	1.37071e-09	1.14074e-07	30	46	22	9	3	5
Mii79952_c2_g2_i1	812	32.9321	-1.86494	0.307805	-6.05884	1.37109e-09	1.14074e-07	43	81	28	19	13	12
Mii46794_c0_g1_i1	685	216.304	0.870343	0.143657	6.05849	1.37403e-09	1.14258e-07	129	216	79	361	323	327
Mii71136_c1_g1_i3	234	12.5545	2.66345	0.439714	6.05724	1.38477e-09	1.1509e-07	1	0	1	33	26	28
Mii86853_c0_g2_i1	588	143.96	-2.61955	0.432485	-6.05698	1.38703e-09	1.15217e-07	136	200	262	24	17	20
Mii76896_c2_g1_i1	345	19.6512	-2.32715	0.384333	-6.05505	1.40375e-09	1.16544e-07	21	50	24	7	4	4
Mii76937_c0_g2_i1	1123	2364.07	-1.88979	0.312147	-6.05417	1.41144e-09	1.17121e-07	2916	4903	2436	1596	899	657
Mii36065_c0_g2_i1	271	18.5404	-2.45893	0.406206	-6.0534	1.4182e-09	1.17619e-07	31	31	22	7	3	1
Mii62571_c0_g1_i1	1029	21.7901	-2.32329	0.383839	-6.05277	1.42376e-09	1.18018e-07	34	45	23	11	5	1
Mii79695_c0_g1_i5	411	18.7428	-2.37539	0.392458	-6.05259	1.42532e-09	1.18085e-07	25	39	23	6	4	3
Mii56304_c0_g1_i2	310	10.087	2.7471	0.453919	6.05196	1.43097e-09	1.1849e-07	0	0	0	27	19	27
Mii78447_c0_g1_i1	2755	86.1124	-1.60699	0.265564	-6.05124	1.43733e-09	1.18954e-07	77	142	109	51	52	35
Mii80099_c0_g1_i2	6091	252.177	-0.85003	0.140491	-6.0504	1.44483e-09	1.19511e-07	230	506	186	255	209	180
Mii79852_c0_g1_i1	2877	36.0273	-1.87768	0.31038	-6.04961	1.45197e-09	1.20039e-07	50	71	35	22	15	10
Mii54331_c0_g1_i2	391	72.1492	2.42891	0.401524	6.04922	1.45545e-09	1.20263e-07	11	7	12	159	150	160
Mii19090_c0_g1_i1	287	17.6788	2.47568	0.409318	6.04832	1.46368e-09	1.2088e-07	2	2	3	34	35	46
Mii54990_c0_g2_i2	241	22.8853	-2.24589	0.371333	-6.04819	1.46478e-09	1.20907e-07	31	57	23	10	9	1
Mii73311_c3_g1_i2	483	85.0591	1.2992	0.214944	6.04437	1.49996e-09	1.23745e-07	39	59	30	163	133	143
Mii66435_c1_g1_i4	418	58.5845	-1.49033	0.24658	-6.044	1.5034e-09	1.23963e-07	67	118	54	42	30	31
Mii11436_c0_g1_i1	337	179.86	-2.17985	0.360785	-6.04196	1.52251e-09	1.25473e-07	176	397	234	86	56	34
Mii79962_c1_g1_i1	578	15.7758	-2.52082	0.417335	-6.04029	1.53835e-09	1.26712e-07	14	46	21	5	2	1
Mii79674_c1_g1_i4	700	42.9437	-1.85829	0.30767	-6.03988	1.54225e-09	1.26967e-07	51	79	49	30	16	11
Mii65378_c0_g1_i1	1824	28.8235	-1.98938	0.329408	-6.03927	1.54811e-09	1.27382e-07	34	76	27	13	14	7
Mii79309_c0_g2_i6	1615	18.2625	-2.44456	0.404815	-6.03871	1.55355e-09	1.27763e-07	26	38	22	4	0	7
Mii4160_c0_g1_i1	331	65.9406	-1.50254	0.248841	-6.03816	1.55885e-09	1.28128e-07	88	146	48	53	42	22
Mii78277_c1_g2_i3	264	38.1349	-1.79364	0.297055	-6.03808	1.55963e-09	1.28128e-07	45	80	39	19	14	20
Mii77473_c5_g5_i1	233	55.6206	-1.67283	0.277233	-6.03402	1.59934e-09	1.31322e-07	55	101	66	36	25	24
Mii49896_c0_g1_i1	251	46.5155	-1.85609	0.307672	-6.03268	1.61262e-09	1.32343e-07	50	75	60	27	15	19
Mii117064_c0_g1_i1	282	10.5866	2.74166	0.454577	6.03123	1.62712e-09	1.33463e-07	0	0	0	18	35	22
Mii73367_c1_g2_i6	1721	20.4674	-2.32205	0.38508	-6.03005	1.6391e-09	1.34375e-07	33	48	19	10	5	1
Mii76549_c2_g3_i2	2156	18.6096	-2.40962	0.399683	-6.02881	1.6517e-09	1.35338e-07	21	41	25	6	5	1
Mii76002_c0_g1_i1	2934	230.985	-1.00499	0.166702	-6.02869	1.65292e-09	1.35367e-07	238	403	192	217	191	135
Mii72174_c4_g5_i1	3362	578.127	-0.666457	0.110573	-6.02733	1.66693e-09	1.36443e-07	545	1026	403	611	528	465
Mii84829_c0_g1_i1	232	23.4043	-2.28159	0.378624	-6.02599	1.68081e-09	1.37507e-07	26	46	32	11	5	3
Mii10711_c0_g1_i1	732	18.0426	-2.46921	0.40983	-6.02497	1.6914e-09	1.38271e-07	24	29	26	4	2	4
Mii56982_c0_g1_i1	307	12.7985	2.64142	0.438415	6.02492	1.69191e-09	1.38271e-07	0	3	0	31	24	35
Mii68651_c0_g1_i3	776	19.7119	-2.36184	0.392056	-6.02425	1.69899e-09	1.38777e-07	23	42	26	8	2	4
Mii74745_c0_g3_i2	2801	554.104	-0.792224	0.13151	-6.02406	1.70099e-09	1.38868e-07	541	954	421	626	411	423
Mii72319_c3_g2_i2	224	109.042	-1.39935	0.232337	-6.02296	1.71256e-09	1.3974e-07	110	190	115	91	69	44
Mii32219_c0_g2_i1	559	15.4832	2.55664	0.424554	6.02195	1.72327e-09	1.40497e-07	0	6	0	30	38	38
Mii79922_c3_g8_i1	293	14.886	-2.49919	0.415016	-6.02192	1.72364e-09	1.40497e-07	25	40	13	5	2	1
Mii72319_c4_g2_i16	291	84.9391	-1.41054	0.234376	-6.01829	1.76265e-09	1.43603e-07	81	161	89	66	52	39
Mii74845_c0_g1_i1	263	10.9017	2.70097	0.449031	6.0151	1.79771e-09	1.46383e-07	0	1	0	28	21	29
Mii74745_c0_g4_i2	555	222.445	-2.17627	0.361995	-6.01189	1.83376e-09	1.49241e-07	294	458	250	122	58	40
Mii76729_c0_g2_i2	3217	103.926	-2.43358	0.40481	-6.01164	1.8365e-09	1.49387e-07	131	229	130	44	12	14
Mii80145_c4_g2_i2	1588	60.6158	-1.51567	0.252136	-6.01133	1.84007e-09	1.49599e-07	66	116	61	41	36	27
Mii75404_c1_g3_i2	1088	26.3651	-2.06763	0.344163	-6.00769	1.88181e-09	1.52913e-07	32	64	27	7	13	8
Mii60799_c0_g1_i1	1443	68.75	-2.46539	0.410581	-6.00462	1.91776e-09	1.55754e-07	66	133	107	21	13	8
Mii70603_c0_g1_i1	4137	119.312	-2.45948	0.409645	-6.00394	1.92589e-09	1.56333e-07	133	264	162	46	12	18
Mii60920_c0_g1_i3	833	15.3317	-2.53726	0.422674	-6.00286	1.9387e-09	1.57291e-07	23	28	20	4	0	3
Mii74235_c1_g1_i1	371	693.24	-2.09206	0.348535	-6.00245	1.94367e-09	1.57613e-07	854	1569	744	422	188	148
Mii69376_c2_g11_i3	1589	19.0539	-2.37932	0.396539	-6.00023	1.97032e-09	1.59692e-07	18	47	26	7	4	2
Mii79628_c0_g8_i1	1835	27.6707	-2.09629	0.349388	-5.99988	1.97459e-09	1.59955e-07	30	56	35	8	12	8
Mii47229_c0_g1_i1	727	20.0278	-2.28166	0.380329	-5.99917	1.98327e-09	1.60575e-07	27	43	23	6	4	6
Mii79863_c5_g2_i5	346	43.7366	-1.65599	0.276171	-5.99624	2.01941e-09	1.63417e-07	53	100	38	31	17	21
Mii77460_c0_g1_i1	1049	745.068	-2.23236	0.372355	-5.99524	2.03185e-09	1.64338e-07	944	1549	880	376	187	123
Mii37909_c0_g1_i1	311	465.308	-2.16641	0.361488	-5.99304	2.05949e-09	1.66488e-07	599	974	526	248	138	78
Mii77355_c1_g1_i12	1581	30.3979	-2.00193	0.334206	-5.99012	2.09688e-09	1.69423e-07	34	66	35	18	7	10
Mii64734_c1_g2_i2	434	14.04	-2.50868	0.418997	-5.98733	2.13315e-09	1.72265e-07	21	38	14	3	3	1
Mii67515_c3_g1_i1	377	93.5785	-2.35053	0.39266	-5.98618	2.14823e-09	1.73394e-07	93	196	133	37	21	13
Mii64791_c3_g1_i1	242	22.4003	-2.17544	0.363425	-5.98595	2.15129e-09	1.73551e-07	34	48	22	9	6	6
Mii73551_c1_g1_i6	410	11.7782	2.65796	0.444086	5.98523	2.16085e-09	1.74233e-07	0	2	0	27	32	24
Mii71231_c6_g2_i1	620	15.9772	-2.45281	0.409825	-5.98502	2.16358e-09	1.74363e-07	23	34	19	2	3	4
Mii80219_c0_g3_i2	283	17.2813	-2.40561	0.402142	-5.982	2.20417e-09	1.77508e-07	28	34	19	5	4	2
Mii76450_c1_g1_i2	969	21.5635	-2.33571	0.39046	-5.98195	2.20487e-09	1.77508e-07	25	44	29	11	3	2
Mii77722_c1_g1_i1	753	100.589	-2.21882	0.370942	-5.98158	2.2099e-09	1.77822e-07	96	204	141	43	20	29
Mii73688_c3_g1_i1	1856	38.939	-1.81314	0.303249	-5.97904	2.24452e-09	1.80515e-07	49	71	42	23	15	15
Mii43199_c0_g2_i1	616	65.704	1.45555	0.24352	5.97711	2.27129e-09	1.82575e-07	16	57	22	133	112	110
Mii80062_c10_g2_i2	514	64.5962	-1.60217	0.268115	-5.97568	2.29134e-09	1.84092e-07	75	117	67	49	37	19
Mii61953_c0_g1_i1	1876	13.012	2.60504	0.43596	5.97542	2.29499e-09	1.8429e-07	2	1	0	39	25	27
Mii53201_c0_g1_i1	633	9.24468	-2.73218	0.457244	-5.97533	2.29627e-09	1.84299e-07	13	18	14	0	0	0
Mii78393_c5_g2_i12	1315	13.3464	-2.57851	0.431571	-5.97471	2.30495e-09	1.84826e-07	17	30	18	3	2	0
Mii71711_c7_g6_i2	930	22.4637	-2.23915	0.374773	-5.9747	2.30519e-09	1.84826e-07	30	41	28	9	5	5
Mii75716_c0_g1_i2	1708	25.3255	-2.30067	0.385103	-5.97416	2.31278e-09	1.8534e-07	25	50	37	14	3	3
Mii76496_c3_g3_i2	309	22.8639	-2.32168	0.388701	-5.97292	2.3304e-09	1.86655e-07	23	46	33	8	8	1
Mii46522_c0_g1_i1	523	19.03	2.39481	0.400952	5.9728	2.33213e-09	1.86699e-07	3	3	3	55	27	43
Mii79932_c2_g2_i6	2910	238.283	0.838174	0.14034	5.97245	2.33717e-09	1.86991e-07	145	257	81	393	378	337
Mii79885_c1_g1_i3	10854	1021.73	-0.710838	0.119021	-5.97238	2.33817e-09	1.86991e-07	974	2038	651	1156	951	694
Mii34772_c0_g1_i1	390	12.8132	-2.61116	0.437217	-5.97223	2.34034e-09	1.87069e-07	11	35	19	1	2	1
Mii41453_c0_g1_i2	270	19.4328	2.38764	0.39981	5.97195	2.34435e-09	1.87295e-07	6	4	0	38	37	52
Mii69404_c0_g1_i1	2630	900.75	0.547721	0.0917223	5.97152	2.3506e-09	1.87627e-07	547	1161	384	1359	1271	1232
Mii73336_c0_g1_i1	1945	344.664	0.765535	0.128198	5.97149	2.3509e-09	1.87627e-07	189	367	149	535	481	546
Mii68181_c2_g1_i3	493	11.6884	-2.63747	0.441731	-5.97076	2.36149e-09	1.88376e-07	20	23	14	1	1	1
Mii74624_c4_g4_i1	230	15.2494	2.53305	0.424268	5.9704	2.36675e-09	1.88699e-07	2	2	1	28	30	44
Mii57038_c0_g1_i1	1444	43.9879	-1.80939	0.303082	-5.96996	2.37313e-09	1.89112e-07	65	77	42	32	17	12
Mii80189_c0_g1_i3	2362	379.804	0.784266	0.131373	5.96976	2.376e-09	1.89245e-07	253	373	140	607	526	602
Mii72504_c2_g2_i1	1487	18.5774	-2.31358	0.38788	-5.96469	2.45103e-09	1.95122e-07	21	47	22	5	5	4
Mii52065_c0_g1_i1	488	9.87863	2.71173	0.454649	5.96445	2.45466e-09	1.95311e-07	0	0	0	24	28	19
Mii57890_c0_g1_i1	239	37.0951	-1.90019	0.318701	-5.96229	2.48726e-09	1.97804e-07	37	77	45	24	12	11
Mii61854_c0_g3_i1	679	9.72062	2.70988	0.454521	5.96204	2.49104e-09	1.98005e-07	0	0	0	24	23	23
Mii61629_c0_g1_i1	919	21.1485	-2.20947	0.370598	-5.96191	2.49301e-09	1.98061e-07	31	51	20	8	3	8
Mii70486_c1_g1_i1	2306	25.8102	2.08679	0.350091	5.96069	2.51175e-09	1.99449e-07	5	11	5	54	53	51
Mii79407_c2_g1_i10	1308	32.858	-1.84526	0.309697	-5.95827	2.54921e-09	2.02321e-07	44	95	22	17	12	16
Mii76869_c1_g1_i1	231	24.0949	-2.22361	0.373368	-5.95554	2.59221e-09	2.0563e-07	27	48	32	12	3	6
Mii78940_c1_g1_i1	1529	25.3117	-2.09934	0.352605	-5.9538	2.61988e-09	2.07719e-07	37	51	26	13	7	6
Mii76738_c3_g1_i2	439	12.274	2.62486	0.440971	5.95245	2.6415e-09	2.09328e-07	1	0	1	33	29	23
Mii75442_c3_g2_i2	3546	728.548	-1.59487	0.267982	-5.95139	2.6588e-09	2.10592e-07	718	1375	809	500	353	354
Mii77182_c1_g1_i1	1044	22.1913	-2.19213	0.368376	-5.9508	2.66833e-09	2.1124e-07	34	44	23	7	5	8
Mii79429_c0_g3_i11	1477	22.297	-2.1925	0.368598	-5.94822	2.7108e-09	2.14405e-07	30	44	26	8	6	6
Mii91253_c0_g1_i1	863	15.762	-2.44384	0.410853	-5.9482	2.71105e-09	2.14405e-07	17	44	19	2	5	2
Mii74580_c5_g4_i2	1540	19.1387	-2.3697	0.398451	-5.94727	2.72653e-09	2.15521e-07	28	34	24	8	3	2
Mii42239_c0_g1_i1	553	269.287	0.913883	0.153692	5.94618	2.74469e-09	2.16847e-07	164	257	93	397	385	486
Mii73551_c0_g3_i2	295	13.1347	2.60235	0.437711	5.94537	2.75836e-09	2.17801e-07	0	2	1	25	26	39
Mii72429_c0_g3_i1	1346	29.694	2.00824	0.337786	5.9453	2.75955e-09	2.17801e-07	10	9	6	72	55	52
Mii92689_c0_g1_i1	516	15.0489	-2.47113	0.415705	-5.94443	2.77414e-09	2.18843e-07	27	31	15	3	3	2
Mii70159_c3_g1_i1	1603	63.4438	-1.47709	0.248488	-5.94432	2.77607e-09	2.18885e-07	74	125	58	43	44	25
Mii48838_c0_g1_i1	359	51.0854	1.56031	0.262505	5.9439	2.7832e-09	2.19337e-07	18	35	14	98	84	99
Mii66984_c0_g1_i1	1688	1202.93	0.630849	0.106253	5.93726	2.89823e-09	2.28287e-07	812	1582	390	1913	1714	1676
Mii66473_c3_g2_i3	512	26.4945	-2.08853	0.351823	-5.93629	2.91537e-09	2.29522e-07	31	51	33	11	9	7
Mii55986_c0_g1_i1	345	18.5105	-2.35098	0.396052	-5.93605	2.91971e-09	2.29748e-07	22	43	23	7	5	1
Mii415_c0_g1_i1	246	15.1902	2.52903	0.426062	5.93583	2.92356e-09	2.29936e-07	0	3	2	38	22	43
Mii25680_c0_g1_i1	663	17.7974	-2.37995	0.40101	-5.93488	2.94067e-09	2.31166e-07	19	47	22	8	2	2
Mii71374_c0_g1_i2	1848	646.281	0.660904	0.111378	5.93388	2.95851e-09	2.32451e-07	352	745	296	1019	968	867
Mii80266_c2_g2_i1	1493	31.0581	-2.0565	0.346635	-5.93276	2.97891e-09	2.33937e-07	30	76	37	21	8	5
Mii70761_c2_g1_i1	489	17.3399	2.41901	0.407746	5.93265	2.9808e-09	2.33969e-07	2	4	2	40	46	28
Mii79702_c0_g1_i1	333	19.003	-2.28645	0.385477	-5.93147	3.00228e-09	2.35536e-07	21	50	22	7	5	3
Mii63519_c0_g1_i1	353	15.2181	-2.51628	0.424278	-5.93074	3.01573e-09	2.36473e-07	19	29	22	5	1	1
[truncated: 259,268+ more rows]

## Sheet: Fig2b adj. p-value<0,01 FC>8
#Feature	length	baseMean	log2FoldChange	lfcSE	stat	pvalue	padj	MiA1	MiA2	MiA3	Mii1	Mii2	Mii3
Mii59046_c1_g1_i2	256	923.772	8.0048	0.304434	26.2941	2.24136e-152	1.75665e-147	0	2	3	2773	1730	2213
Mii59046_c1_g1_i1	266	546.017	7.47466	0.322816	23.1545	1.30874e-118	2.93061e-114	0	0	3	1673	1029	1270
Mii40291_c0_g2_i2	292	403.189	7.28358	0.339874	21.4303	6.97933e-102	1.21555e-97	0	0	1	1193	775	962
Mii40291_c0_g3_i1	337	418.744	7.27076	0.330727	21.9841	4.08512e-107	8.00417e-103	0	0	2	1113	892	1018
Mii40291_c0_g1_i1	274	318.091	7.1131	0.350209	20.311	1.02772e-91	1.46448e-87	0	0	0	846	670	784
Mii38105_c0_g2_i1	229	278.511	6.93344	0.354021	19.5848	2.08428e-85	2.17805e-81	0	0	0	783	547	690
Mii40291_c0_g2_i1	274	294.94	6.91558	0.345581	20.0114	4.37767e-89	5.2784e-85	0	1	0	820	592	725
Mii38105_c0_g3_i1	265	189.292	6.36709	0.355217	17.9245	7.58896e-72	5.66454e-68	0	1	0	503	394	471
Mii103283_c0_g1_i1	516	175.373	6.35025	0.365533	17.3726	1.33121e-67	8.02556e-64	0	0	0	531	336	410
Mii74868_c2_g1_i2	2620	223.531	6.33719	0.340204	18.6276	1.91945e-77	1.6715e-73	1	0	2	483	520	592
Mii59862_c0_g1_i1	821	276.629	6.31621	0.313328	20.1585	2.26772e-90	2.96217e-86	0	3	4	619	686	667
Mii79740_c1_g1_i2	4229	473.532	6.20366	0.247326	25.0829	7.63954e-139	3.99161e-134	6	7	10	1159	1126	1087
Mii38105_c0_g1_i1	265	165.235	6.19338	0.357902	17.3047	4.33747e-67	2.51811e-63	0	0	1	459	349	387
Mii39740_c0_g1_i1	1086	186.822	6.14355	0.342943	17.9142	9.13903e-72	6.51147e-68	2	1	0	464	389	490
Mii78361_c3_g1_i1	3179	602.335	6.12579	0.225951	27.1112	7.2641e-162	1.13863e-156	11	18	6	1366	1366	1548
Mii48141_c2_g1_i2	308	186.106	6.11702	0.34411	17.7763	1.07804e-70	7.04087e-67	0	1	2	516	346	482
Mii83983_c0_g1_i1	368	160.379	6.04225	0.352077	17.1617	5.13451e-66	2.87437e-62	0	0	2	439	324	394
Mii79253_c2_g1_i1	5341	402.86	5.90747	0.245352	24.0775	4.30279e-128	1.34891e-123	5	10	10	1110	827	944
Mii72927_c0_g1_i2	1964	236.696	5.8392	0.297791	19.6084	1.31166e-85	1.46857e-81	3	3	5	536	578	566
Mii48141_c2_g1_i1	235	123.816	5.82031	0.365835	15.9097	5.43003e-57	2.36429e-53	0	0	1	343	249	303
Mii69030_c2_g1_i1	2149	214.043	5.73561	0.299029	19.1808	5.35967e-82	5.25074e-78	1	6	4	619	459	461
Mii40648_c0_g1_i2	834	125.336	5.68832	0.36152	15.7345	8.78008e-56	3.62174e-52	2	0	0	297	244	358
Mii71509_c0_g1_i5	542	129.84	5.68757	0.36273	15.6799	2.07557e-55	8.3421e-52	0	0	2	244	341	335
Mii65894_c0_g1_i2	613	102.335	5.68042	0.379687	14.9608	1.32406e-50	4.41581e-47	0	0	0	235	224	276
Mii58307_c0_g1_i1	464	124.841	5.64409	0.353155	15.9819	1.70803e-57	7.8744e-54	0	3	0	320	259	320
Mii74868_c1_g1_i1	1543	144.455	5.62806	0.33737	16.6821	1.7676e-62	9.23558e-59	1	2	2	327	340	362
Mii40648_c0_g1_i1	687	86.8241	5.49016	0.383551	14.3141	1.78788e-46	4.9166e-43	0	0	0	217	183	226
Mii70702_c0_g3_i4	428	91.5189	5.43189	0.374415	14.5077	1.08364e-47	3.14552e-44	0	0	1	213	223	219
Mii53816_c0_g1_i1	630	177.059	5.40838	0.298266	18.1327	1.75748e-73	1.37741e-69	2	5	5	429	423	404
Mii25047_c0_g1_i1	429	75.581	5.3016	0.388572	13.6438	2.19808e-42	4.71978e-39	0	0	0	210	141	197
Mii58307_c1_g1_i1	609	133.1	5.28381	0.327229	16.1471	1.18953e-58	5.6502e-55	0	6	2	324	260	366
Mii52153_c0_g1_i1	1313	116.637	5.16023	0.333659	15.4656	5.92289e-54	2.21048e-50	0	3	4	257	261	307
Mii69809_c1_g1_i2	787	100.775	5.15261	0.345344	14.9202	2.43531e-50	7.95272e-47	1	1	3	242	230	244
Mii71509_c0_g1_i1	353	79.4561	5.14588	0.373542	13.7759	3.55943e-43	8.32736e-40	0	2	0	181	175	213
Mii63871_c0_g1_i1	584	67.7953	5.03236	0.384884	13.075	4.575e-39	7.96802e-36	1	0	0	152	147	186
Mii25047_c0_g2_i1	429	62.305	5.03235	0.39606	12.706	5.47446e-37	7.87257e-34	0	0	0	189	105	160
Mii78361_c0_g1_i1	605	75.7849	4.98067	0.367492	13.5532	7.5899e-42	1.5654e-38	0	2	1	184	159	199
Mii71136_c1_g1_i4	710	70.1118	4.97213	0.374946	13.2609	3.9016e-40	7.19492e-37	0	0	2	169	158	173
Mii26999_c0_g1_i1	756	92.5607	4.95004	0.346197	14.2983	2.24121e-46	5.95432e-43	0	4	2	197	221	237
Mii109492_c0_g1_i1	480	71.8293	4.9267	0.379208	12.9921	1.35708e-38	2.2873e-35	0	0	2	139	160	209
Mii48141_c1_g2_i1	430	54.6686	4.88585	0.399192	12.2393	1.9159e-34	2.20819e-31	0	0	0	172	100	127
Mii65395_c0_g1_i1	1135	83.3629	4.86131	0.353344	13.758	4.55807e-43	1.05069e-39	0	1	4	184	184	220
Mii69030_c0_g1_i1	690	77.9241	4.8287	0.35279	13.6872	1.21135e-42	2.75183e-39	1	2	2	209	175	172
Mii62447_c1_g1_i1	1278	136.797	4.82781	0.30366	15.8987	6.46656e-57	2.73952e-53	3	8	4	263	331	362
Mii48141_c1_g1_i1	430	65.3292	4.82364	0.380949	12.6622	9.58038e-37	1.34081e-33	0	0	2	186	108	176
Mii65894_c0_g1_i1	521	61.2347	4.76977	0.380841	12.5243	5.49616e-36	7.06157e-33	0	0	2	132	144	158
Mii87058_c0_g1_i1	356	49.4702	4.7469	0.403052	11.7774	5.10519e-32	4.76327e-29	0	0	0	117	95	144
Mii91763_c0_g1_i1	423	53.3588	4.739	0.391129	12.1162	8.66991e-34	9.50343e-31	0	0	1	124	126	131
Mii66552_c1_g2_i1	420	57.5584	4.71769	0.382839	12.3229	6.8196e-35	8.09818e-32	0	1	1	136	121	154
Mii51329_c1_g1_i1	609	46.8563	4.70946	0.403102	11.6831	1.55586e-31	1.4016e-28	0	0	0	118	96	124
Mii62479_c0_g1_i1	815	54.8878	4.70918	0.394211	11.9458	6.8252e-33	6.77111e-30	0	0	1	104	127	158
Mii65395_c0_g1_i2	1135	47.1059	4.69326	0.404154	11.6126	3.55814e-31	3.13332e-28	0	0	0	99	111	127
Mii69809_c1_g2_i1	770	222.387	4.68892	0.366723	12.786	1.96293e-37	2.90269e-34	2	6	8	470	519	577
Mii71509_c0_g1_i4	260	78.2145	4.63017	0.346854	13.349	1.20015e-40	2.26653e-37	1	4	2	162	201	187
Mii67076_c1_g1_i1	870	68.2861	4.62376	0.358877	12.884	5.54011e-38	9.14106e-35	0	2	3	176	133	176
Mii74274_c1_g1_i1	624	48.3777	4.59965	0.397237	11.5791	5.26032e-31	4.58081e-28	0	1	0	99	115	131
Mii66552_c1_g2_i2	421	65.0887	4.59438	0.359196	12.7907	1.84743e-37	2.75791e-34	0	3	2	167	144	152
Mii52575_c0_g1_i2	454	94.9804	4.58413	0.32306	14.1897	1.06091e-45	2.7716e-42	2	5	4	212	194	260
Mii58412_c1_g1_i1	860	50.331	4.57131	0.387371	11.8008	3.8644e-32	3.62717e-29	0	2	0	123	109	129
Mii79740_c1_g1_i3	806	58.3291	4.56911	0.369881	12.3529	4.69634e-35	5.66263e-32	0	4	0	150	131	137
Mii49419_c0_g1_i1	791	59.5754	4.5541	0.368856	12.3466	5.0837e-35	6.0829e-32	0	2	2	176	128	123
Mii65211_c0_g1_i2	2038	64.9837	4.52104	0.354828	12.7415	3.47687e-37	5.09338e-34	0	5	1	167	147	149
Mii74274_c4_g6_i1	820	58.1547	4.50788	0.368538	12.2318	2.1028e-34	2.38563e-31	0	1	3	141	135	135
Mii76738_c4_g3_i1	1002	61.5281	4.49159	0.361416	12.4277	1.84766e-35	2.2451e-32	0	2	3	145	143	146
Mii71136_c0_g1_i1	710	94.528	4.48874	0.323494	13.8758	8.8787e-44	2.17456e-40	2	6	4	183	215	260
Mii70702_c0_g5_i1	229	67.3557	4.48773	0.357472	12.554	3.77697e-36	4.93361e-33	0	3	3	138	182	152
Mii59171_c1_g1_i1	781	115.048	4.48691	0.289966	15.4739	5.20579e-54	1.99024e-50	1	11	6	279	258	268
Mii47850_c0_g1_i1	742	49.128	4.47511	0.390726	11.4533	2.26302e-30	1.89692e-27	0	1	1	105	100	144
Mii71509_c0_g1_i6	289	50.6935	4.45191	0.380808	11.6907	1.42225e-31	1.28864e-28	0	2	1	115	121	124
Mii65211_c0_g1_i1	2019	96.1265	4.44784	0.309862	14.3543	1.00147e-46	2.8032e-43	0	9	5	219	226	227
Mii42458_c0_g2_i1	426	47.3822	4.43163	0.391649	11.3153	1.10233e-29	8.77097e-27	0	1	1	93	119	123
Mii66576_c0_g1_i1	984	37.848	4.42913	0.410799	10.7817	4.19844e-27	2.74207e-24	0	0	0	91	102	79
Mii68974_c2_g1_i2	649	38.1426	4.42876	0.411068	10.7738	4.57787e-27	2.97748e-24	0	0	0	81	89	103
Mii79211_c2_g1_i3	3013	88.6717	4.42157	0.316869	13.9539	2.9779e-44	7.4092e-41	1	10	2	201	204	218
Mii78361_c2_g4_i1	246	51.6864	4.41762	0.382526	11.5485	7.50864e-31	6.46684e-28	0	1	2	110	106	149
Mii72927_c0_g1_i1	3208	396.023	4.40822	0.416094	10.5943	3.16685e-26	1.9019e-23	4	4	9	875	961	973
Mii78361_c2_g2_i1	338	36.6152	4.40785	0.410814	10.7296	7.3936e-27	4.69203e-24	0	0	0	93	87	84
Mii71509_c0_g1_i2	280	65.2178	4.38795	0.349142	12.5678	3.17364e-36	4.25181e-33	0	3	4	158	156	144
Mii58025_c0_g1_i2	524	59.1161	4.37583	0.357689	12.2336	2.05603e-34	2.3524e-31	0	4	2	150	128	141
Mii70702_c0_g2_i1	229	47.8088	4.37285	0.39635	11.0328	2.65429e-28	1.86572e-25	0	1	1	103	79	158
Mii61416_c2_g2_i3	813	43.4825	4.36639	0.404376	10.7978	3.52367e-27	2.32071e-24	0	0	1	71	113	122
Mii66576_c0_g1_i4	1242	47.597	4.35507	0.381878	11.4044	3.97677e-30	3.28079e-27	0	1	2	129	112	98
Mii67781_c1_g1_i1	876	102.702	4.34004	0.296456	14.6398	1.56628e-48	4.91023e-45	3	7	7	241	221	251
Mii70702_c0_g3_i3	348	52.6405	4.33134	0.375256	11.5423	8.07011e-31	6.91242e-28	0	1	3	109	118	142
Mii67076_c1_g1_i3	565	58.2417	4.31754	0.360598	11.9733	4.90573e-33	4.92925e-30	1	3	2	152	152	108
Mii66576_c0_g1_i2	964	37.3823	4.3046	0.403899	10.6576	1.60634e-26	9.83554e-24	0	1	0	97	92	80
Mii79253_c3_g1_i1	595	37.652	4.29087	0.402846	10.6514	1.71804e-26	1.0438e-23	0	0	1	100	78	92
Mii68004_c1_g1_i1	228	60.2631	4.28389	0.353832	12.1071	9.68292e-34	1.03957e-30	0	4	3	137	129	157
Mii64964_c0_g1_i3	1316	418.617	4.28042	0.178787	23.9415	1.13362e-126	2.96153e-122	29	43	28	944	902	1021
Mii71136_c1_g2_i1	464	84.2624	4.27426	0.315537	13.546	8.36842e-42	1.70355e-38	5	3	5	198	179	208
Mii64964_c0_g1_i2	339	105.15	4.25907	0.292883	14.5419	6.57562e-48	1.98215e-44	2	9	8	230	237	259
Mii69809_c0_g1_i1	665	223.413	4.25407	0.401968	10.5831	3.56869e-26	2.13506e-23	3	4	8	483	507	585
Mii74845_c3_g1_i2	1930	41.455	4.24719	0.394494	10.7662	4.97222e-27	3.20735e-24	0	0	2	88	107	97
Mii74845_c3_g1_i3	1959	36.1691	4.23622	0.406791	10.4138	2.14576e-25	1.21864e-22	0	1	0	89	69	102
Mii79949_c1_g1_i3	5442	463.239	4.23265	0.171689	24.653	3.4144e-134	1.338e-129	24	65	30	1006	1105	1056
Mii62612_c0_g1_i1	1541	46.5048	4.21479	0.37878	11.1273	9.2415e-29	6.7691e-26	1	2	1	101	105	122
Mii68974_c2_g1_i1	1145	52.8954	4.20664	0.370977	11.3394	8.37491e-30	6.76676e-27	0	1	4	109	145	114
Mii97707_c0_g1_i1	365	38.6875	4.20194	0.396309	10.6027	2.89565e-26	1.74572e-23	0	1	1	90	86	99
Mii60536_c1_g1_i1	533	59.4422	4.19511	0.350019	11.9854	4.239e-33	4.31464e-30	1	5	2	129	146	141
Mii79740_c1_g1_i1	4294	523.817	4.17325	0.425595	9.80568	1.06425e-22	4.68595e-20	4	8	13	1214	1228	1279
Mii70702_c0_g1_i1	224	49.4355	4.16413	0.374559	11.1174	1.03203e-28	7.48928e-26	0	3	2	96	113	137
Mii68239_c0_g1_i3	2586	175.997	4.15825	0.233255	17.827	4.35909e-71	2.97078e-67	9	20	13	487	353	378
Mii49727_c0_g1_i1	873	62.5496	4.14628	0.346207	11.9763	4.72828e-33	4.7816e-30	0	5	4	126	152	156
Mii76738_c4_g2_i2	644	84.287	4.12024	0.305209	13.4997	1.5697e-41	3.11451e-38	0	13	4	204	192	192
Mii74845_c3_g2_i1	1425	77.9983	4.08687	0.3159	12.9372	2.77556e-38	4.62833e-35	3	4	7	192	155	192
Mii52575_c0_g1_i1	442	76.4395	4.07809	0.318123	12.8192	1.27958e-37	1.96638e-34	2	6	6	173	156	199
Mii69809_c0_g2_i1	452	48.8829	4.07255	0.366432	11.1141	1.07163e-28	7.74084e-26	0	3	3	105	117	119
Mii51987_c0_g1_i1	368	31.7507	4.06219	0.411843	9.86344	5.99607e-23	2.71639e-20	0	1	0	70	66	91
Mii60536_c0_g1_i2	628	62.9933	4.05232	0.348216	11.6374	2.66029e-31	2.35591e-28	1	6	3	115	136	185
Mii63360_c0_g1_i1	315	45.1454	4.05123	0.374059	10.8305	2.46899e-27	1.65388e-24	0	2	3	103	95	118
Mii56819_c0_g1_i2	835	33.4129	4.02594	0.401393	10.0299	1.12606e-23	5.43101e-21	1	1	0	86	71	82
Mii53135_c0_g1_i1	819	60.6919	3.99496	0.340726	11.7248	9.51018e-32	8.76883e-29	1	3	6	134	133	151
Mii62146_c0_g1_i2	442	50.2971	3.9881	0.361369	11.0361	2.55884e-28	1.80673e-25	2	2	3	101	120	127
Mii63360_c0_g1_i3	319	42.3826	3.98435	0.377525	10.5539	4.87466e-26	2.88337e-23	0	3	2	92	93	112
Mii22432_c0_g1_i1	537	30.7343	3.97863	0.412788	9.63845	5.50126e-22	2.27523e-19	0	0	1	60	74	83
Mii60536_c1_g1_i2	533	67.5847	3.97646	0.326971	12.1615	4.98205e-34	5.53848e-31	3	6	4	163	124	182
Mii68004_c2_g3_i1	305	26.5379	3.97271	0.423314	9.3848	6.30388e-21	2.41005e-18	0	0	0	58	70	62
Mii33835_c0_g1_i1	380	36.2956	3.95862	0.396085	9.99438	1.61293e-23	7.70805e-21	2	1	0	75	75	106
Mii61085_c0_g1_i1	583	26.0295	3.95179	0.423821	9.3242	1.11821e-20	4.12415e-18	0	0	0	60	56	71
Mii42458_c0_g1_i1	345	44.9398	3.94617	0.368753	10.7014	1.00253e-26	6.2858e-24	1	2	3	109	88	117
Mii68564_c0_g1_i1	1178	37.5874	3.93973	0.385817	10.2114	1.76318e-24	9.18188e-22	1	2	1	88	81	96
Mii61635_c0_g1_i1	777	82.8624	3.93916	0.306657	12.8455	9.11731e-38	1.45827e-34	5	7	6	179	161	228
Mii78361_c2_g3_i1	338	28.3658	3.93152	0.415035	9.47272	2.72643e-21	1.07378e-18	0	1	0	65	61	77
Mii78361_c2_g1_i1	338	31.4918	3.93068	0.403979	9.72991	2.24784e-22	9.60068e-20	0	1	1	78	65	81
Mii71509_c0_g1_i7	225	32.7235	3.91551	0.404087	9.68977	3.33263e-22	1.40049e-19	0	0	2	65	83	81
Mii60536_c0_g1_i1	626	71.222	3.9122	0.314254	12.4492	1.41309e-35	1.74409e-32	3	5	7	174	155	160
Mii56819_c0_g1_i1	818	47.245	3.90639	0.366303	10.6644	1.49415e-26	9.18451e-24	2	3	2	89	111	127
Mii41520_c0_g1_i1	428	34.4908	3.8977	0.397452	9.80672	1.05335e-22	4.65319e-20	2	1	0	71	74	98
Mii36687_c0_g1_i1	404	27.5321	3.89604	0.415993	9.36565	7.55821e-21	2.84109e-18	0	1	0	70	54	74
Mii18517_c0_g1_i1	408	37.9952	3.89577	0.387381	10.0567	8.58461e-24	4.20506e-21	1	1	2	78	82	105
Mii90016_c0_g1_i1	508	36.4799	3.88897	0.386909	10.0514	9.05952e-24	4.41013e-21	0	2	2	84	83	89
Mii38493_c0_g3_i1	567	24.6796	3.88792	0.425465	9.13807	6.35797e-20	2.16182e-17	0	0	0	56	63	58
Mii67304_c1_g2_i2	1431	27.1161	3.88684	0.415887	9.34589	9.11194e-21	3.39259e-18	0	1	0	71	67	57
Mii75533_c4_g4_i1	922	273.452	3.88104	0.19039	20.3847	2.28677e-92	3.58447e-88	21	39	25	615	610	621
Mii68004_c1_g1_i3	267	34.5073	3.87916	0.395874	9.79898	1.13727e-22	4.9934e-20	2	0	1	74	73	95
Mii36687_c0_g2_i1	286	25.0165	3.87844	0.426396	9.09585	9.38532e-20	3.10806e-17	0	0	0	66	43	72
Mii69030_c1_g1_i1	334	27.1932	3.86433	0.414662	9.31924	1.17177e-20	4.29141e-18	0	0	1	70	61	63
Mii22432_c0_g2_i1	537	32.4254	3.86241	0.406986	9.49028	2.30417e-21	9.12055e-19	0	0	2	57	78	91
Mii57348_c0_g1_i1	1364	164.131	3.85672	0.356735	10.8111	3.04836e-27	2.02468e-24	5	11	12	346	376	410
Mii50536_c0_g1_i1	694	463.95	3.84655	0.372483	10.3268	5.3314e-25	2.90169e-22	19	24	27	995	1096	1124
Mii61158_c2_g1_i1	510	34.1951	3.83601	0.389587	9.84635	7.10795e-23	3.2016e-20	0	3	1	93	75	75
Mii54332_c0_g1_i2	371	78.8623	3.83545	0.298664	12.8421	9.53149e-38	1.49404e-34	6	6	7	208	162	171
Mii67746_c0_g1_i2	801	72.1367	3.82694	0.305936	12.509	6.66846e-36	8.49811e-33	3	11	4	171	171	155
Mii65058_c1_g2_i1	644	31.5416	3.8055	0.399997	9.5138	1.83818e-21	7.35027e-19	0	2	1	80	58	86
Mii14341_c0_g1_i1	264	45.8491	3.80411	0.360596	10.5495	5.10494e-26	2.99696e-23	1	4	3	103	91	124
Mii62111_c2_g4_i2	440	29.2911	3.79975	0.406195	9.35448	8.40123e-21	3.1429e-18	0	0	2	69	69	68
Mii74624_c4_g2_i1	415	33.9053	3.79199	0.391642	9.68229	3.58593e-22	1.50291e-19	2	2	0	71	85	82
Mii79287_c8_g1_i1	407	29.3366	3.78949	0.408826	9.26921	1.87527e-20	6.75737e-18	2	0	0	68	55	85
Mii79949_c1_g1_i1	1092	94.0691	3.78831	0.274395	13.806	2.34335e-43	5.65101e-40	10	14	3	225	202	218
Mii69809_c1_g1_i1	355	25.0236	3.77796	0.419157	9.01324	2.00051e-19	6.4126e-17	0	1	0	58	58	63
Mii56227_c0_g1_i1	435	25.8388	3.77633	0.4177	9.04078	1.55563e-19	5.05895e-17	0	0	1	57	58	68
Mii72927_c0_g1_i3	3183	385.425	3.77188	0.431512	8.74107	2.30917e-18	6.74036e-16	6	6	13	919	844	967
Mii52606_c0_g2_i1	394	49.8159	3.75922	0.351045	10.7087	9.26865e-27	5.85823e-24	3	5	2	98	112	133
Mii98588_c0_g1_i1	464	28.3575	3.75116	0.408629	9.17987	4.31597e-20	1.48685e-17	1	0	1	59	70	70
Mii43666_c0_g1_i1	355	37.0308	3.74893	0.376603	9.9546	2.4079e-23	1.13004e-20	2	4	0	92	79	90
Mii69814_c0_g1_i1	794	83.7499	3.74026	0.295873	12.6414	1.24793e-36	1.7257e-33	3	13	7	170	176	223
Mii20196_c0_g1_i1	473	29.2549	3.72975	0.404212	9.22721	2.77775e-20	9.74066e-18	0	3	0	62	77	68
Mii7305_c0_g1_i1	602	26.7059	3.7145	0.411203	9.03326	1.66639e-19	5.39676e-17	1	1	0	71	50	70
Mii66576_c0_g1_i3	671	24.2432	3.70805	0.420106	8.82646	1.08043e-18	3.25058e-16	1	0	0	58	50	65
Mii49965_c0_g1_i1	634	118.718	3.68921	0.261705	14.0968	3.97127e-45	1.00401e-41	6	22	10	340	193	282
Mii71136_c0_g1_i2	351	46.5621	3.68628	0.349541	10.5461	5.29748e-26	3.0984e-23	5	4	1	108	100	114
Mii73551_c0_g2_i5	562	23.2264	3.67792	0.422167	8.712	2.9857e-18	8.603e-16	0	1	0	53	53	60
Mii51007_c0_g1_i1	383	84.3658	3.66894	0.28517	12.8658	7.01005e-38	1.1446e-34	3	17	6	185	203	186
Mii41090_c0_g1_i1	488	20.9917	3.66167	0.432032	8.47548	2.34122e-17	6.10617e-15	0	0	0	44	58	48
Mii16745_c0_g1_i1	286	20.5987	3.65989	0.431647	8.47891	2.27323e-17	5.93873e-15	0	0	0	48	47	53
Mii75822_c2_g1_i1	438	33.9546	3.65712	0.385302	9.49159	2.27543e-21	9.02961e-19	0	2	3	80	69	87
Mii44966_c0_g1_i1	817	33.1805	3.6485	0.386232	9.44641	3.50648e-21	1.36989e-18	2	2	1	73	84	74
Mii42638_c0_g1_i1	441	22.8854	3.63242	0.421365	8.62062	6.65954e-18	1.86405e-15	0	0	1	60	54	49
Mii68239_c0_g1_i2	359	25.2914	3.62599	0.414389	8.75019	2.12992e-18	6.22873e-16	1	1	0	57	71	51
Mii61989_c0_g1_i1	691	20.6297	3.62166	0.433451	8.35541	6.52054e-17	1.59203e-14	0	0	0	39	50	58
Mii73551_c0_g2_i7	1442	49.6754	3.61989	0.336173	10.768	4.87712e-27	3.15901e-24	3	9	1	126	109	110
Mii79211_c2_g1_i5	2995	47.6094	3.61927	0.342969	10.5528	4.93157e-26	2.90607e-23	1	9	2	114	101	115
Mii61416_c2_g2_i1	1131	38.1843	3.61775	0.371556	9.73676	2.10153e-22	9.02495e-20	3	2	2	81	82	100
Mii78937_c1_g1_i1	3083	259.368	3.60379	0.426979	8.44019	3.16811e-17	8.08787e-15	2	12	12	576	594	651
Mii24870_c0_g1_i1	353	57.8846	3.60235	0.320211	11.2499	2.31769e-29	1.80743e-26	5	8	3	128	130	137
Mii69809_c0_g3_i1	230	22.7551	3.58441	0.423729	8.4592	2.69218e-17	6.91794e-15	0	0	1	44	56	60
Mii62034_c1_g1_i1	435	35.887	3.57855	0.380355	9.40845	5.03519e-21	1.95845e-18	2	1	3	72	76	98
Mii68004_c2_g2_i1	226	19.7638	3.57775	0.43445	8.23512	1.79377e-16	4.09868e-14	0	0	0	45	38	59
Mii49553_c0_g1_i1	409	24.3192	3.57333	0.415983	8.59008	8.69094e-18	2.39839e-15	1	1	0	52	51	69
Mii55497_c1_g1_i1	465	23.3791	3.5685	0.416523	8.56736	1.05883e-17	2.89592e-15	0	2	0	59	58	50
Mii75533_c2_g1_i1	396	130.009	3.56838	0.234312	15.2292	2.26344e-52	8.25092e-49	12	26	10	289	290	294
Mii73357_c2_g4_i1	365	21.9481	3.56217	0.423703	8.40723	4.1982e-17	1.04954e-14	0	0	1	48	52	55
Mii76750_c3_g2_i1	1511	35.7592	3.56133	0.372753	9.55411	1.24649e-21	5.03568e-19	2	3	2	81	79	87
Mii55497_c0_g1_i1	260	19.1706	3.55952	0.434539	8.19149	2.58018e-16	5.75303e-14	0	0	0	46	39	53
Mii78937_c0_g1_i2	525	59.2767	3.55722	0.317826	11.1924	4.44413e-29	3.36526e-26	5	12	1	129	148	129
Mii69837_c0_g1_i4	800	66.6933	3.55255	0.319521	11.1184	1.02133e-28	7.44611e-26	3	6	9	130	140	177
Mii62146_c0_g1_i1	444	26.0292	3.54948	0.405319	8.75725	2.0008e-18	5.86208e-16	1	1	1	71	53	60
Mii41090_c0_g2_i1	488	21.7826	3.53737	0.424858	8.32602	8.36073e-17	2.0131e-14	0	0	1	55	39	61
Mii5005_c0_g1_i1	342	43.046	3.52652	0.350281	10.0677	7.67573e-24	3.79544e-21	2	7	2	96	104	96
Mii31916_c1_g1_i1	270	35.5009	3.51482	0.385293	9.12247	7.34333e-20	2.48072e-17	2	1	3	68	66	109
Mii77919_c0_g2_i5	1457	18.2412	3.51159	0.435547	8.06248	7.47627e-16	1.55423e-13	0	0	0	50	43	39
Mii68004_c1_g1_i2	240	24.5244	3.5044	0.416403	8.41589	3.89932e-17	9.79983e-15	0	0	2	45	63	62
Mii63122_c0_g1_i2	1137	23.4047	3.50388	0.417605	8.39042	4.84395e-17	1.19949e-14	0	1	1	47	64	53
Mii56304_c0_g1_i1	446	29.0928	3.49882	0.393802	8.88471	6.40851e-19	1.96965e-16	0	4	1	62	71	70
Mii67746_c0_g1_i1	957	113.794	3.49595	0.255611	13.6769	1.39596e-42	3.08189e-39	11	15	14	247	227	283
Mii76460_c2_g1_i1	949	18.2832	3.49427	0.436339	8.00814	1.16456e-15	2.34933e-13	0	0	0	41	50	40
Mii76359_c6_g2_i3	617	29.9809	3.48584	0.392728	8.87596	6.93337e-19	2.1268e-16	2	2	1	63	60	85
Mii74845_c2_g1_i1	432	17.7196	3.47344	0.436574	7.95612	1.77514e-15	3.52662e-13	0	0	0	47	43	38
Mii9625_c0_g1_i1	255	22.3983	3.47124	0.41774	8.30956	9.60543e-17	2.29867e-14	0	1	1	61	55	43
Mii69110_c3_g2_i1	747	22.2954	3.46668	0.417725	8.29896	1.05031e-16	2.49136e-14	0	1	1	51	55	51
Mii49419_c0_g1_i2	378	17.4943	3.45534	0.437072	7.90565	2.66539e-15	5.17072e-13	0	0	0	43	39	44
Mii75533_c4_g4_i2	751	200.073	3.45345	0.208544	16.5598	1.35957e-61	6.87452e-58	27	30	22	439	476	407
Mii65321_c0_g1_i4	740	18.0759	3.44663	0.438178	7.86582	3.66696e-15	6.97559e-13	0	0	0	35	39	55
Mii79682_c0_g1_i2	323	56.1791	3.44623	0.316958	10.8728	1.55296e-27	1.05378e-24	4	10	4	121	132	127
Mii57527_c0_g1_i1	761	19.1646	3.43263	0.429156	7.99856	1.25885e-15	2.52653e-13	0	1	0	45	44	48
Mii71407_c3_g2_i4	904	67.3774	3.41788	0.304474	11.2255	3.05529e-29	2.3476e-26	7	8	7	132	146	171
Mii70798_c1_g2_i5	774	23.2103	3.40893	0.411283	8.28852	1.14666e-16	2.69469e-14	0	2	1	62	56	46
Mii70798_c1_g2_i6	641	21.0181	3.4072	0.419925	8.11384	4.90458e-16	1.05602e-13	1	1	0	51	51	47
Mii78937_c0_g1_i1	496	27.2554	3.40475	0.398677	8.54012	1.34081e-17	3.60496e-15	1	4	0	53	65	72
Mii79858_c18_g1_i1	361	22.1162	3.40035	0.418337	8.12825	4.35545e-16	9.4689e-14	0	0	2	55	42	58
Mii92137_c0_g1_i1	246	23.5502	3.39857	0.410508	8.27893	1.24286e-16	2.89905e-14	1	1	1	58	61	46
Mii61161_c0_g1_i3	681	20.5278	3.39568	0.421865	8.04921	8.33281e-16	1.71636e-13	0	2	0	48	49	49
Mii51329_c0_g1_i1	235	16.6633	3.39088	0.438854	7.72667	1.10401e-14	2.01691e-12	0	0	0	48	33	40
Mii76738_c4_g3_i2	595	20.3977	3.38963	0.422035	8.03163	9.61844e-16	1.95294e-13	0	2	0	55	49	42
Mii25514_c0_g1_i1	602	21.4643	3.38561	0.418987	8.08046	6.45223e-16	1.36488e-13	1	0	1	53	42	56
Mii61416_c1_g1_i1	526	134.438	3.38292	0.23656	14.3005	2.17286e-46	5.87228e-43	13	27	15	264	289	334
Mii62034_c1_g1_i3	552	50.1366	3.38189	0.328642	10.2905	7.77892e-25	4.17579e-22	8	7	1	109	113	118
Mii83417_c0_g1_i1	259	25.3248	3.37163	0.408892	8.24576	1.64121e-16	3.77762e-14	1	3	0	48	50	79
Mii62612_c0_g1_i3	1543	37.2061	3.36865	0.36019	9.35245	8.56433e-21	3.19629e-18	0	6	4	94	76	85
Mii43608_c0_g1_i1	239	50.0839	3.36174	0.32899	10.2183	1.64122e-24	8.57528e-22	6	7	3	101	116	120
Mii102173_c0_g1_i1	900	65.1883	3.35972	0.427045	7.86736	3.6221e-15	6.89863e-13	0	4	4	194	87	182
Mii57076_c1_g1_i1	474	22.1885	3.3526	0.412863	8.12035	4.6483e-16	1.00681e-13	0	2	1	61	45	51
Mii79561_c1_g1_i1	355	16.3198	3.35236	0.439996	7.61907	2.55514e-14	4.4551e-12	0	0	0	36	37	44
Mii61085_c0_g1_i2	555	16.0585	3.3487	0.439836	7.61354	2.66698e-14	4.63464e-12	0	0	0	42	35	39
Mii79253_c1_g1_i1	424	20.4758	3.34076	0.423274	7.89267	2.95798e-15	5.71007e-13	1	1	0	62	33	52
Mii73357_c2_g3_i1	232	21.0702	3.32737	0.420642	7.9102	2.56977e-15	5.01003e-13	0	0	2	49	41	57
Mii54332_c0_g1_i1	383	106.238	3.32446	0.246923	13.4635	2.56304e-41	5.0219e-38	6	25	14	248	218	239
Mii61416_c2_g1_i1	759	185.168	3.32358	0.202409	16.4201	1.37314e-60	6.72617e-57	15	45	24	423	365	433
Mii49226_c0_g1_i3	610	38.9759	3.31617	0.353711	9.37535	6.89444e-21	2.60407e-18	3	4	4	85	83	95
Mii68315_c0_g1_i1	1156	133.547	3.31528	0.225379	14.7098	5.57841e-49	1.7845e-45	17	26	15	292	302	285
Mii51535_c0_g1_i1	833	82.1654	3.31412	0.273599	12.1131	9.00546e-34	9.80269e-31	9	13	10	175	177	191
Mii58393_c0_g1_i1	717	90.7241	3.31212	0.269407	12.2941	9.73956e-35	1.1393e-31	14	11	10	193	213	192
Mii54332_c0_g1_i3	419	66.6523	3.30153	0.292499	11.2873	1.51593e-29	1.19406e-26	4	15	7	145	143	157
Mii65366_c0_g1_i1	476	50.4582	3.30103	0.328946	10.0352	1.06774e-23	5.16564e-21	8	7	2	107	98	135
Mii77919_c0_g2_i6	1336	17.2018	3.29207	0.433207	7.5993	2.97731e-14	5.14539e-12	0	1	0	41	38	44
Mii44734_c0_g1_i1	556	66.4194	3.29193	0.293936	11.1995	4.10102e-29	3.12052e-26	4	15	7	148	131	165
Mii47269_c0_g1_i1	392	15.5375	3.28929	0.441643	7.44784	9.48777e-14	1.53953e-11	0	0	0	40	42	30
Mii98555_c0_g1_i1	398	23.4556	3.28809	0.416905	7.88691	3.09763e-15	5.93578e-13	0	1	2	37	54	70
Mii12090_c0_g1_i1	396	16.087	3.28023	0.442735	7.40901	1.27244e-13	2.03316e-11	0	0	0	39	25	52
Mii77919_c0_g2_i1	1445	24.5222	3.27478	0.400799	8.17064	3.06752e-16	6.76269e-14	0	4	1	72	51	50
Mii76738_c4_g2_i5	859	22.9235	3.27443	0.407095	8.04339	8.73836e-16	1.79283e-13	2	2	0	58	45	58
Mii34314_c0_g1_i1	308	46.6612	3.27173	0.334117	9.79217	1.21651e-22	5.31156e-20	4	5	6	99	100	112
Mii63749_c0_g1_i2	703	31.6355	3.26181	0.374597	8.70753	3.10569e-18	8.91595e-16	4	2	2	86	71	60
Mii40229_c0_g1_i1	390	150.225	3.26109	0.408871	7.97583	1.51359e-15	3.01847e-13	2	17	12	392	355	295
Mii70798_c1_g1_i1	541	24.4574	3.25947	0.398995	8.1692	3.10433e-16	6.83425e-14	1	3	1	59	58	53
Mii66965_c1_g3_i2	359	73.9029	3.25738	0.285557	11.4071	3.85425e-30	3.19654e-27	10	11	8	150	179	158
Mii50982_c1_g1_i1	487	43.0943	3.25564	0.342804	9.49711	2.15801e-21	8.60722e-19	5	6	3	84	95	110
Mii51987_c0_g1_i2	368	15.0778	3.24894	0.442753	7.33803	2.16755e-13	3.36728e-11	0	0	0	47	27	36
Mii71407_c3_g1_i1	919	193.223	3.23352	0.212672	15.2042	3.31536e-52	1.18108e-48	34	31	22	391	437	430
Mii36238_c0_g1_i1	284	95.5591	3.22147	0.257838	12.4942	8.03251e-36	1.01539e-32	16	15	10	202	200	225
Mii50691_c0_g1_i1	522	20.31	3.21899	0.418889	7.6846	1.53479e-14	2.75258e-12	1	2	0	40	48	54
Mii90945_c0_g1_i1	305	18.2876	3.21586	0.426005	7.54888	4.39008e-14	7.39932e-12	1	1	0	48	35	47
Mii79211_c2_g1_i2	1049	16.7366	3.20956	0.433457	7.40455	1.31591e-13	2.10048e-11	0	0	1	39	38	41
Mii61158_c0_g1_i2	315	16.7076	3.20843	0.433473	7.4017	1.34457e-13	2.14185e-11	0	0	1	41	41	36
Mii24528_c0_g1_i1	422	16.7552	3.2076	0.433583	7.39791	1.38347e-13	2.19936e-11	0	0	1	38	38	42
Mii76750_c3_g2_i2	1434	32.3277	3.20746	0.371323	8.63794	5.72356e-18	1.61069e-15	4	3	2	76	59	85
Mii64706_c2_g1_i2	697	20.4163	3.20673	0.418808	7.6568	1.90619e-14	3.36477e-12	0	2	1	40	46	56
Mii79211_c0_g1_i1	640	20.4589	3.20055	0.419386	7.63152	2.32011e-14	4.05884e-12	0	2	1	38	48	56
Mii64706_c2_g1_i4	571	16.0706	3.19943	0.435958	7.33885	2.1543e-13	3.35505e-11	0	1	0	39	33	43
Mii118082_c0_g1_i1	295	21.0463	3.19657	0.416117	7.68191	1.56738e-14	2.80462e-12	2	0	1	42	53	50
Mii61416_c1_g2_i1	448	28.7645	3.18596	0.386971	8.23309	1.82447e-16	4.16277e-14	0	3	4	62	55	78
Mii69642_c2_g1_i4	964	18.6333	3.18565	0.427461	7.45249	9.15935e-14	1.48933e-11	0	1	1	36	39	55
Mii69837_c0_g1_i6	718	64.8252	3.1853	0.308799	10.3151	6.0193e-25	3.26475e-22	13	11	2	113	149	167
Mii47439_c0_g1_i2	331	20.0948	3.18525	0.417019	7.63814	2.20378e-14	3.86395e-12	1	1	1	54	37	50
Mii61085_c0_g3_i1	483	14.2023	3.18468	0.444089	7.17127	7.43056e-13	1.07546e-10	0	0	0	33	34	35
Mii39567_c0_g1_i1	229	38.9951	3.18457	0.348661	9.13371	6.61907e-20	2.24573e-17	3	6	4	80	84	97
Mii78361_c1_g1_i1	281	17.8147	3.18339	0.426933	7.45642	8.89083e-14	1.44717e-11	1	1	0	50	34	43
Mii74868_c0_g1_i1	353	15.3771	3.18301	0.445603	7.14315	9.12153e-13	1.29627e-10	0	0	0	24	33	52
Mii65321_c0_g1_i1	738	14.2504	3.17741	0.444429	7.14942	8.71437e-13	1.24178e-10	0	0	0	31	38	33
Mii68004_c2_g1_i1	234	14.2739	3.16838	0.444811	7.12298	1.05621e-12	1.4835e-10	0	0	0	29	33	40
Mii121761_c0_g1_i1	465	20.1218	3.1674	0.417164	7.59271	3.13287e-14	5.37276e-12	0	1	2	59	40	42
Mii62034_c1_g1_i2	669	55.0298	3.16706	0.312147	10.146	3.45053e-24	1.77916e-21	4	8	9	124	112	127
Mii46246_c0_g1_i1	412	14.047	3.16558	0.444643	7.11937	1.08419e-12	1.52007e-10	0	0	0	33	30	38
Mii26629_c0_g1_i1	254	32.2241	3.15761	0.376981	8.37603	5.47437e-17	1.34709e-14	4	3	2	59	64	94
Mii56991_c0_g1_i1	883	91.8003	3.15173	0.446	7.06667	1.58698e-12	2.15934e-10	1	1	5	196	198	250
Mii76359_c6_g5_i1	303	13.7879	3.14647	0.445034	7.07018	1.54736e-12	2.11461e-10	0	0	0	32	34	33
Mii71407_c3_g2_i5	856	42.3117	3.1433	0.337153	9.32307	1.13017e-20	4.1585e-18	4	9	3	85	94	104
Mii68004_c1_g2_i1	315	33.5723	3.14229	0.370936	8.47123	2.42813e-17	6.31185e-15	0	5	5	67	67	91
Mii74845_c2_g1_i2	459	13.7218	3.1325	0.445555	7.03056	2.05699e-12	2.73533e-10	0	0	0	42	25	33
Mii73551_c0_g2_i6	1392	50.5941	3.12897	0.319531	9.79241	1.21366e-22	5.31156e-20	8	8	4	106	128	101
Mii7689_c0_g1_i1	280	15.1598	3.12777	0.437895	7.14273	9.14952e-13	1.29907e-10	0	1	0	42	37	30
Mii45315_c0_g1_i1	442	20.4285	3.12068	0.417265	7.4789	7.49468e-14	1.23013e-11	0	0	3	48	50	42
Mii59862_c0_g2_i1	473	160.576	3.11964	0.444817	7.01332	2.32728e-12	3.06037e-10	1	7	9	340	335	448
Mii15219_c0_g2_i1	296	20.8686	3.11849	0.410713	7.59288	3.12876e-14	5.37159e-12	0	2	2	49	48	47
Mii6910_c0_g2_i1	282	13.5281	3.11523	0.445887	6.9866	2.81631e-12	3.63634e-10	0	0	0	30	31	36
Mii74845_c4_g2_i1	390	15.3745	3.11275	0.439038	7.08992	1.34186e-12	1.85643e-10	0	1	0	30	34	45
Mii50084_c0_g1_i1	398	25.5531	3.10951	0.393029	7.91165	2.54e-15	4.95816e-13	1	5	1	50	56	69
Mii65321_c0_g1_i2	699	16.4056	3.1065	0.441259	7.04007	1.92144e-12	2.56326e-10	0	1	0	22	40	53
Mii45377_c0_g1_i1	487	16.8857	3.10204	0.429615	7.2205	5.17973e-13	7.65956e-11	1	1	0	38	35	46
Mii8045_c0_g1_i1	395	109.907	3.10108	0.245901	12.6111	1.83378e-36	2.47794e-33	11	22	19	284	196	239
Mii66556_c3_g1_i4	515	15.4982	3.09872	0.436692	7.0959	1.28509e-12	1.7842e-10	0	0	1	35	33	41
Mii65011_c0_g1_i1	1665	18.0423	3.0973	0.423856	7.30744	2.72278e-13	4.16787e-11	0	3	0	39	43	45
Mii63573_c0_g1_i1	1430	45.133	3.09379	0.333071	9.28868	1.56208e-20	5.65478e-18	4	10	4	82	103	114
Mii63749_c0_g1_i3	904	44.5536	3.09294	0.327427	9.44621	3.51325e-21	1.36989e-18	4	13	2	95	101	103
Mii74687_c2_g1_i2	781	34.0427	3.08711	0.356452	8.66069	4.68933e-18	1.32919e-15	3	6	3	80	81	68
Mii38418_c0_g1_i2	920	15.2972	3.08697	0.440414	7.00925	2.39603e-12	3.14729e-10	0	1	0	56	24	32
Mii65267_c2_g1_i1	444	24.0463	3.07958	0.394346	7.80933	5.74913e-15	1.07924e-12	1	6	0	57	55	55
Mii76738_c4_g2_i3	781	15.6474	3.07489	0.438114	7.01847	2.24317e-12	2.96219e-10	0	0	1	34	28	48
Mii45069_c0_g1_i1	334	44.9396	3.07257	0.332933	9.22879	2.73703e-20	9.61938e-18	4	6	7	90	96	109
Mii68974_c0_g1_i1	355	13.4139	3.06587	0.447577	6.84992	7.38895e-12	8.88874e-10	0	0	0	30	42	24
Mii76359_c6_g2_i2	584	25.6863	3.06244	0.388145	7.88993	3.02355e-15	5.8223e-13	3	2	2	58	53	63
Mii65366_c0_g2_i1	282	35.4095	3.06172	0.357827	8.55643	1.16413e-17	3.15973e-15	6	3	3	71	85	79
Mii38418_c0_g1_i1	848	13.1182	3.06031	0.447489	6.83885	7.9833e-12	9.57435e-10	0	0	0	44	29	23
Mii52090_c1_g1_i1	396	32.4986	3.05771	0.368222	8.30398	1.0068e-16	2.3984e-14	3	2	5	74	79	63
Mii64964_c0_g1_i1	714	430.38	3.05046	0.426386	7.15423	8.41448e-13	1.20562e-10	14	29	36	909	979	1069
Mii54128_c0_g2_i1	460	43.6244	3.04808	0.332614	9.16403	4.99952e-20	1.70733e-17	6	9	3	97	77	117
Mii51960_c0_g1_i1	1173	80.3151	3.04779	0.268413	11.3548	7.01618e-30	5.6983e-27	12	27	3	164	167	199
Mii56893_c0_g1_i1	550	19.2301	3.04703	0.41531	7.33676	2.18828e-13	3.38607e-11	0	3	1	54	38	43
Mii53765_c0_g1_i1	497	15.1794	3.04372	0.438713	6.93785	3.9811e-12	5.01228e-10	0	0	1	29	34	43
Mii56054_c0_g1_i1	252	43.7853	3.04356	0.327272	9.29977	1.40746e-20	5.11873e-18	5	8	5	94	100	95
Mii51987_c0_g1_i3	365	16.3348	3.0399	0.43076	7.05708	1.70039e-12	2.2977e-10	0	1	1	36	43	35
Mii56227_c1_g1_i1	898	12.7715	3.03856	0.447765	6.78605	1.15243e-11	1.35312e-09	0	0	0	31	25	36
Mii65517_c0_g1_i1	1116	32.6622	3.03075	0.357754	8.4716	2.42053e-17	6.30254e-15	3	6	3	75	70	74
Mii51769_c0_g1_i2	768	58.505	3.02978	0.300264	10.0904	6.09245e-24	3.06083e-21	11	9	6	120	124	138
Mii67781_c1_g1_i3	876	75.5786	3.02362	0.265309	11.3966	4.34782e-30	3.56813e-27	10	19	9	173	149	172
Mii65616_c0_g1_i1	283	12.467	3.02116	0.448	6.74368	1.54429e-11	1.77206e-09	0	0	0	32	26	32
Mii48052_c0_g1_i1	361	107.838	3.01871	0.373842	8.0748	6.75846e-16	1.42007e-13	15	8	10	241	238	244
Mii40579_c0_g1_i1	304	14.7704	3.01231	0.439439	6.8549	7.13631e-12	8.63119e-10	0	0	1	28	36	39
Mii6910_c0_g1_i1	282	12.3768	3.0117	0.448251	6.71877	1.83267e-11	2.07264e-09	0	0	0	37	27	26
Mii78361_c1_g3_i1	281	17.3232	3.01084	0.425253	7.08011	1.44036e-12	1.98047e-10	1	2	0	36	37	48
Mii63360_c0_g1_i2	360	71.63	3.01034	0.408995	7.36035	1.83429e-13	2.88387e-11	4	4	8	139	172	173
Mii106157_c0_g1_i1	474	18.011	3.00986	0.423323	7.11007	1.15984e-12	1.6218e-10	1	1	1	36	50	38
Mii73551_c1_g1_i4	748	25.8164	3.00768	0.383699	7.83864	4.55463e-15	8.5912e-13	1	4	3	65	55	55
Mii55987_c0_g1_i1	476	24.0982	3.00633	0.390306	7.7025	1.33427e-14	2.40949e-12	2	3	2	60	53	51
Mii79211_c1_g1_i1	1045	12.5385	3.00498	0.448655	6.69776	2.1164e-11	2.37467e-09	0	0	0	28	25	37
Mii57091_c0_g1_i1	494	20.7364	3.00459	0.407587	7.37165	1.68525e-13	2.66088e-11	0	3	2	46	46	50
